# Supplementary material for: Delving Deep into the Structural Aspects of the BPro28-BLys29 Exchange in Insulin Lispro: A Structural Biophysical Lesson
Source: Preprints.org preprint supplement (doi:10.20944/preprints202007.0552.v1), 2020-07-23
Supplement: Supplementary file 1 [file supplementary]

# Delving Deep into the Structural Aspects of the BPro28-BLys29 Exchange in Insulin *Lispro*: A Structural Biophysical Lesson

Wei Li \*

July 13, 2020

---

\*Institute of Special Environmental Medicine, Nantong University, No. 9, Seyuan Road, Nantong City, Jiangsu Province, People's Republic of China

# Graphical Abstract

# Regular insulin

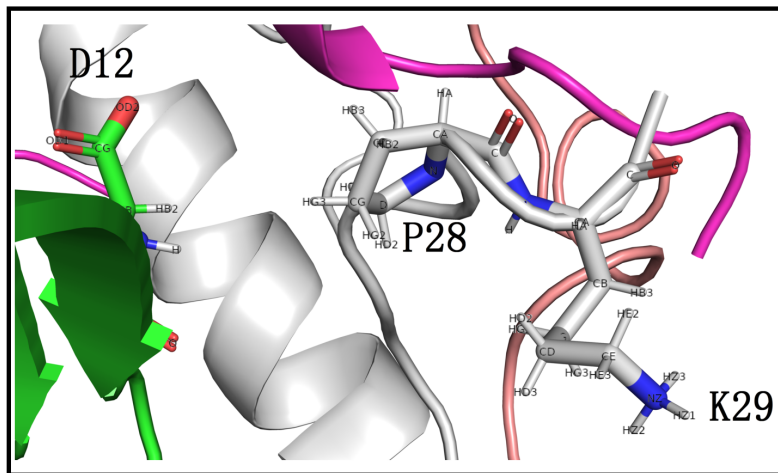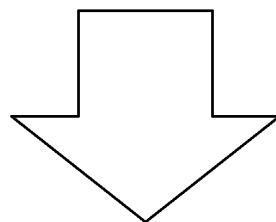

# Insulin lispro

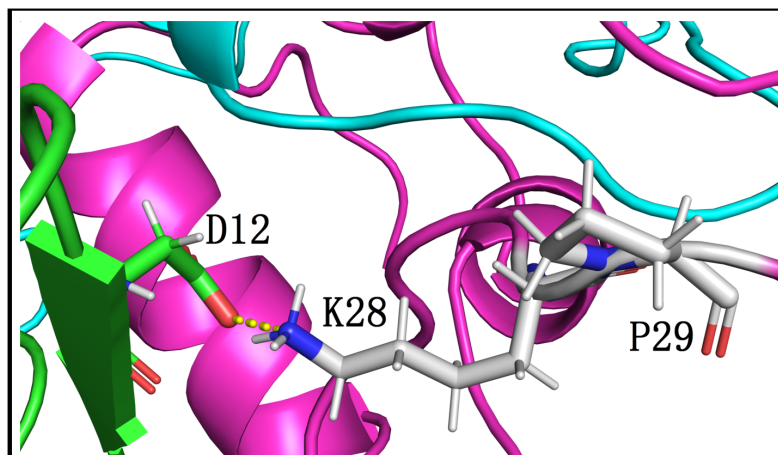

Figure 1: The net biophysical impact of the simple BPro28-BLys29 exchange is a novel set of interfacial structurally stabilizing interactions (yellow dotted line, including salt bridges and side chain hydrogen bond) between Lys28 of insulin lispro and Asp12 of insulin receptor (IR).
