# Supplementary material for: Delving Deep into the Structural Aspects of the BPro28-BLys29 Exchange in Insulin Lispro: A Structural Biophysical Lesson
Source: Preprints.org preprint supplement (doi:10.20944/preprints202007.0552.v1), 2020-07-23
Supplement: Supplementary file 3 [file supplementary]

Archive with 3 entries (3 files):
- grafic.pdf
- lispro.pdb
- supps.pdf
