# Supplementary material for: Delving Deep into the Structural Aspects of the BPro28-BLys29 Exchange in Insulin Lispro: A Structural Biophysical Lesson
Source: Preprints.org preprint supplement (doi:10.20944/preprints202007.0552.v1), 2020-07-23
Supplement: Supplementary file 3 [file supplementary › lispro.pdb]

TITLE     SWISS-MODEL SERVER (https://swissmodel.expasy.org)
TITLE    2 Multiple target project
EXPDTA    THEORETICAL MODEL (SWISS-MODEL SERVER)
AUTHOR    SWISS-MODEL SERVER (SEE REFERENCE IN JRNL Records)
REVDAT   1   12-MAY-20 1MOD    1       09:44
JRNL        AUTH   A.WATERHOUSE,M.BERTONI,S.BIENERT,G.STUDER,G.TAURIELLO,
JRNL        AUTH 2 R.GUMIENNY,F.T.HEER,T.A.P.DE BEER,C.REMPFER,L.BORDOLI,
JRNL        AUTH 3 R.LEPORE,T.SCHWEDE
JRNL        TITL   SWISS-MODEL: HOMOLOGY MODELLING OF PROTEIN STRUCTURES AND
JRNL        TITL 2 COMPLEXES
JRNL        REF    NUCLEIC.ACIDS.RES..           V.  46 W296  2018
JRNL        PMID   29788355
JRNL        DOI    10.1093/nar/gky427
REMARK   1
REMARK   1 REFERENCE 1
REMARK   1  AUTH   S.BIENERT,A.WATERHOUSE,T.A.P.DE BEER,G.TAURIELLO,G.STUDER,
REMARK   1  AUTH 2 L.BORDOLI,T.SCHWEDE
REMARK   1  TITL   THE SWISS-MODEL REPOSITORY - NEW FEATURES AND FUNCTIONALITY
REMARK   1  REF    NUCLEIC.ACIDS.RES..           V.  22       2017
REMARK   1  REFN                   ISSN 0305-1048
REMARK   1  PMID   27899672
REMARK   1  DOI    10.1093/nar/gkw1132
REMARK   1
REMARK   1 REFERENCE 2
REMARK   1  AUTH   N.GUEX,M.C.PEITSCH,T.SCHWEDE
REMARK   1  TITL   AUTOMATED COMPARATIVE PROTEIN STRUCTURE MODELING WITH
REMARK   1  TITL 2 SWISS-MODEL AND SWISS-PDBVIEWER: A HISTORICAL PERSPECTIVE
REMARK   1  REF    ELECTROPHORESIS               V.  30       2009
REMARK   1  REFN                   ISSN 0173-0835
REMARK   1  PMID   19517507
REMARK   1  DOI    10.1002/elps.200900140
REMARK   1
REMARK   1 REFERENCE 3
REMARK   1  AUTH   P.BENKERT,M.BIASINI,T.SCHWEDE
REMARK   1  TITL   TOWARD THE ESTIMATION OF THE ABSOLUTE QUALITY OF INDIVIDUAL
REMARK   1  TITL 2 PROTEIN STRUCTURE MODELS
REMARK   1  REF    BIOINFORMATICS                V.  27       2011
REMARK   1  REFN                   ISSN 1367-4803
REMARK   1  PMID   21134891
REMARK   1  DOI    10.1093/bioinformatics/btq662
REMARK   1
REMARK   1 REFERENCE 4
REMARK   1  AUTH   M.BERTONI,F.KIEFER,M.BIASINI,L.BORDOLI,T.SCHWEDE
REMARK   1  TITL   MODELING PROTEIN QUATERNARY STRUCTURE OF HOMO- AND
REMARK   1  TITL 2 HETERO-OLIGOMERS BEYOND BINARY INTERACTIONS BY HOMOLOGY
REMARK   1  REF    SCI.REP.                      V.   7       2017
REMARK   1  REFN                   ISSN
REMARK   1  PMID   28874689
REMARK   1  DOI    10.1038/s41598-017-09654-8
REMARK   1
REMARK   1 DISCLAIMER
REMARK   1 The SWISS-MODEL SERVER produces theoretical models for proteins.
REMARK   1 The results of any theoretical modelling procedure is
REMARK   1 NON-EXPERIMENTAL and MUST be considered with care. These models may
REMARK   1 contain significant errors. This is especially true for automated
REMARK   1 modeling since there is no human intervention during model
REMARK   1 building. Please read the header section and the logfile carefully
REMARK   1 to know what templates and alignments were used during the model
REMARK   1 building process. All information by the SWISS-MODEL SERVER is
REMARK   1 provided "AS-IS", without any warranty, expressed or implied.
REMARK   2
REMARK   2 COPYRIGHT NOTICE
REMARK   2 This SWISS-MODEL protein model is copyright. It is produced by the
REMARK   2 SWISS-MODEL server, developed by the Computational Structural
REMARK   2 Biology Group at the SIB Swiss Institute of Bioinformatics at the
REMARK   2 Biozentrum, University of Basel (https://swissmodel.expasy.org). This
REMARK   2 model is licensed under the CC BY-SA 4.0 Creative Commons
REMARK   2 Attribution-ShareAlike 4.0 International License
REMARK   2 (https://creativecommons.org/licenses/by-sa/4.0/legalcode), i.e. you
REMARK   2 can copy and redistribute the model in any medium or format,
REMARK   2 transform and build upon the model for any purpose, even
REMARK   2 commercially, under the following terms:
REMARK   2 Attribution - You must give appropriate credit, provide a link to
REMARK   2 the license, and indicate if changes were made. You may do so in any
REMARK   2 reasonable manner, but not in any way that suggests the licensor
REMARK   2 endorses you or your use. When you publish, patent or distribute
REMARK   2 results that were fully or partially based on the model, please cite
REMARK   2 the corresponding papers mentioned under JRNL.
REMARK   2 ShareAlike - If you remix, transform, or build upon the material,
REMARK   2 you must distribute your contributions under the same license as the
REMARK   2 original.
REMARK   2 No additional restrictions - you may not apply legal terms or
REMARK   2 technological measures that legally restrict others from doing
REMARK   2 anything the license permits.
REMARK   2 Find a human-readable summary of (and not a substitute for) the
REMARK   2 CC BY-SA 4.0 license at this link:
REMARK   2 https://creativecommons.org/licenses/by-sa/4.0/
REMARK   3 
REMARK   3 MODEL INFORMATION
REMARK   3  ENGIN   PROMOD3
REMARK   3  VERSN   3.0.0
REMARK   3  OSTAT   hetero-2-4-mer
REMARK   3  OSRSN   TEMPLATE
REMARK   3  QSPRD   0.759
REMARK   3  QMN4    -2.51
REMARK   3  MODT    FALSE
REMARK   3 
REMARK   3 TEMPLATE 1
REMARK   3  PDBID   6pxv
REMARK   3  CHAIN   D
REMARK   3  MMCIF   C
REMARK   3  CHAIN   E
REMARK   3  MMCIF   D
REMARK   3  CHAIN   F
REMARK   3  MMCIF   E
REMARK   3  CHAIN   G
REMARK   3  MMCIF   F
REMARK   3  CHAIN   A
REMARK   3  MMCIF   A
REMARK   3  CHAIN   C
REMARK   3  MMCIF   B
REMARK   3  PDBV    2020-05-01
REMARK   3  SMTLE   6pxv.1
REMARK   3  SMTLV   2020-05-06
REMARK   3  MTHD    ELECTRON MICROSCOPY 0.00 A
REMARK   3  FOUND   HHblits
REMARK   3  SIM     0.62
REMARK   3  SID     99.86
REMARK   3  OSTAT   hetero-2-4-mer
REMARK   3  ALN C TRG FVNQHLCGSHLVEALYLVCGERGFFYTKPTRREAEDLQGSLQPLALEGSLQKRGIVEQ
REMARK   3  ALN C TRG CCTSICSLYQLENYCN
REMARK   3  ALN C TPL FVNQHLCGSHLVEALYLVCGERGFFYTPKTRREAEDLQGSLQPLALEGSLQKRGIVEQ
REMARK   3  ALN C TPL CCTSICSLYQLENYCN
REMARK   3  ALN C OFF 0
REMARK   3  ALN D TRG FVNQHLCGSHLVEALYLVCGERGFFYTKPTRREAEDLQGSLQPLALEGSLQKRGIVEQ
REMARK   3  ALN D TRG CCTSICSLYQLENYCN
REMARK   3  ALN D TPL FVNQHLCGSHLVEALYLVCGERGFFYTPKTRREAEDLQGSLQPLALEGSLQKRGIVEQ
REMARK   3  ALN D TPL CCTSICSLYQLENYCN
REMARK   3  ALN D OFF 0
REMARK   3  ALN E TRG FVNQHLCGSHLVEALYLVCGERGFFYTKPTRREAEDLQGSLQPLALEGSLQKRGIVEQ
REMARK   3  ALN E TRG CCTSICSLYQLENYCN
REMARK   3  ALN E TPL FVNQHLCGSHLVEALYLVCGERGFFYTPKTRREAEDLQGSLQPLALEGSLQKRGIVEQ
REMARK   3  ALN E TPL CCTSICSLYQLENYCN
REMARK   3  ALN E OFF 0
REMARK   3  ALN F TRG FVNQHLCGSHLVEALYLVCGERGFFYTKPTRREAEDLQGSLQPLALEGSLQKRGIVEQ
REMARK   3  ALN F TRG CCTSICSLYQLENYCN
REMARK   3  ALN F TPL FVNQHLCGSHLVEALYLVCGERGFFYTPKTRREAEDLQGSLQPLALEGSLQKRGIVEQ
REMARK   3  ALN F TPL CCTSICSLYQLENYCN
REMARK   3  ALN F OFF 0
REMARK   3  ALN A TRG HLYPGEVCPGMDIRNNLTRLHELENCSVIEGHLQILLMFKTRPEDFRDLSFPKLIMIT
REMARK   3  ALN A TRG DYLLLFRVYGLESLKDLFPNLTVIRGSRLFFNYALVIFEMVHLKELGLYNLMNITRGS
REMARK   3  ALN A TRG VRIEKNNELCYLATIDWSRILDSVEDNYIVLNKDDNEECGDICPGTAKGKTNCPATVI
REMARK   3  ALN A TRG NGQFVERCWTHSHCQKVCPTICKSHGCTAEGLCCHSECLGNCSQPDDPTKCVACRNFY
REMARK   3  ALN A TRG LDGRCVETCPPPYYHFQDWRCVNFSFCQDLHHKCKNSRRQGCHQYVIHNNKCIPECPS
REMARK   3  ALN A TRG GYTMNSSNLLCTPCLGPCPKVCHLLEGEKTIDSVTSAQELRGCTVINGSLIINIRGGN
REMARK   3  ALN A TRG NLAAELEANLGLIEEISGYLKIRRSYALVSLSFFRKLRLIRGETLEIGNYSFYALDNQ
REMARK   3  ALN A TRG NLRQLWDWSKHNLTITQGKLFFHYNPKLCLSEIHKMEEVSGTKGRQERNDIALKTNGD
REMARK   3  ALN A TRG QASCENELLKFSYIRTSFDKILLRWEPYWPPDFRDLLGFMLFYKEAPYQNVTEFDGQD
REMARK   3  ALN A TRG ACGSNSWTVVDIDPPLRSNDPKSQNHPGWLMRGLKPWTQYAIFVKTLVTFSDERRTYG
REMARK   3  ALN A TRG AKSDIIYVQTDATNPSVPLDPISVSNSSSQIILKWKPPSDPNGNITHYLVFWERQAED
REMARK   3  ALN A TRG SELFELDYCLKGLKLPSRTWSPPFESEDSQKHNQSEYEDSAGECCSCPKTDSQILKEL
REMARK   3  ALN A TRG EESSFRKTFEDYLHNVVFVPRPSRKRRSLGDVGNVTVAVPTVAAFPNTSSTSVPTSPE
REMARK   3  ALN A TRG EHRPFEKVVNKESLVISGLRHFTGYRIELQACNQDTPEERCSVAAYVSARTMPEAKAD
REMARK   3  ALN A TRG DIVGPVTHEIFENNVVHLMWQEPKEPNGLIVLYEVSYRRYGDEELHLCVSRKHFALER
REMARK   3  ALN A TRG GCRLRGLSPGNYSVRIRATSLAGNGSWTEPTYFYVTDYLDVPSNIAKIIIGPLIFVFL
REMARK   3  ALN A TRG FSVVIGSIYLFLRKRQPDGPLGPLYASSNPEFLTASDVFPCSVYVPDEWEVSREKITL
REMARK   3  ALN A TRG LRELGQGSFGMVYEGNARDIIKGEAETRVAVKTVNESASLRERIEFLNEASVMKGFTC
REMARK   3  ALN A TRG HHVVRLLGVVSKGQPTLVVMELMAHGDLKSYLRSLRPEAENNPGRPPPTLQEMIQMAA
REMARK   3  ALN A TRG EIADGMAYLNAKKFVHRNLAARNCMVAHDFTVKIGDFGMTRDIYETDYYRKGGKGLLP
REMARK   3  ALN A TRG VRWMAPESLKDGVFTTSSDMWSFGVVLWEITSLAEQPYQGLSNEQVLKFVMDGGYLDQ
REMARK   3  ALN A TRG PDNCPERVTDLMRMCWQFNPKMRPTFLEIVNLLKDDLHPSFPEVSFFHSEENKAPESE
REMARK   3  ALN A TRG ELEMEFEDMENVPLDRSSHCQREEAGGRDGGSSLGFKRSYEEHIPYTHMNGGKKNGAA
REMARK   3  ALN A TRG ATAPRSNPSLESSGLEVLFQ
REMARK   3  ALN A TPL HLYPGEVCPGMDIRNNLTRLHELENCSVIEGHLQILLMFKTRPEDFRDLSFPKLIMIT
REMARK   3  ALN A TPL DYLLLFRVYGLESLKDLFPNLTVIRGSRLFFNYALVIFEMVHLKELGLYNLMNITRGS
REMARK   3  ALN A TPL VRIEKNNELCYLATIDWSRILDSVEDNYIVLNKDDNEECGDICPGTAKGKTNCPATVI
REMARK   3  ALN A TPL NGQFVERCWTHSHCQKVCPTICKSHGCTAEGLCCHSECLGNCSQPDDPTKCVACRNFY
REMARK   3  ALN A TPL LDGRCVETCPPPYYHFQDWRCVNFSFCQDLHHKCKNSRRQGCHQYVIHNNKCIPECPS
REMARK   3  ALN A TPL GYTMNSSNLLCTPCLGPCPKVCHLLEGEKTIDSVTSAQELRGCTVINGSLIINIRGGN
REMARK   3  ALN A TPL NLAAELEANLGLIEEISGYLKIRRSYALVSLSFFRKLRLIRGETLEIGNYSFYALDNQ
REMARK   3  ALN A TPL NLRQLWDWSKHNLTITQGKLFFHYNPKLCLSEIHKMEEVSGTKGRQERNDIALKTNGD
REMARK   3  ALN A TPL QASCENELLKFSYIRTSFDKILLRWEPYWPPDFRDLLGFMLFYKEAPYQNVTEFDGQD
REMARK   3  ALN A TPL ACGSNSWTVVDIDPPLRSNDPKSQNHPGWLMRGLKPWTQYAIFVKTLVTFSDERRTYG
REMARK   3  ALN A TPL AKSDIIYVQTDATNPSVPLDPISVSNSSSQIILKWKPPSDPNGNITHYLVFWERQAED
REMARK   3  ALN A TPL SELFELDYCLKGLKLPSRTWSPPFESEDSQKHNQSEYEDSAGECCSCPKTDSQILKEL
REMARK   3  ALN A TPL EESSFRKTFEDYLHNVVFVPRPSRKRRSLGDVGNVTVAVPTVAAFPNTSSTSVPTSPE
REMARK   3  ALN A TPL EHRPFEKVVNKESLVISGLRHFTGYRIELQACNQDTPEERCSVAAYVSARTMPEAKAD
REMARK   3  ALN A TPL DIVGPVTHEIFENNVVHLMWQEPKEPNGLIVLYEVSYRRYGDEELHLCVSRKHFALER
REMARK   3  ALN A TPL GCRLRGLSPGNYSVRIRATSLAGNGSWTEPTYFYVTDYLDVPSNIAKIIIGPLIFVFL
REMARK   3  ALN A TPL FSVVIGSIYLFLRKRQPDGPLGPLYASSNPEFLTASDVFPCSVYVPDEWEVSREKITL
REMARK   3  ALN A TPL LRELGQGSFGMVYEGNARDIIKGEAETRVAVKTVNESASLRERIEFLNEASVMKGFTC
REMARK   3  ALN A TPL HHVVRLLGVVSKGQPTLVVMELMAHGDLKSYLRSLRPEAENNPGRPPPTLQEMIQMAA
REMARK   3  ALN A TPL EIADGMAYLNAKKFVHRNLAARNCMVAHDFTVKIGDFGMTRDIYETDYYRKGGKGLLP
REMARK   3  ALN A TPL VRWMAPESLKDGVFTTSSDMWSFGVVLWEITSLAEQPYQGLSNEQVLKFVMDGGYLDQ
REMARK   3  ALN A TPL PDNCPERVTDLMRMCWQFNPKMRPTFLEIVNLLKDDLHPSFPEVSFFHSEENKAPESE
REMARK   3  ALN A TPL ELEMEFEDMENVPLDRSSHCQREEAGGRDGGSSLGFKRSYEEHIPYTHMNGGKKNGAA
REMARK   3  ALN A TPL ATAPRSNPS-----------
REMARK   3  ALN A OFF 0
REMARK   3  ALN B TRG HLYPGEVCPGMDIRNNLTRLHELENCSVIEGHLQILLMFKTRPEDFRDLSFPKLIMIT
REMARK   3  ALN B TRG DYLLLFRVYGLESLKDLFPNLTVIRGSRLFFNYALVIFEMVHLKELGLYNLMNITRGS
REMARK   3  ALN B TRG VRIEKNNELCYLATIDWSRILDSVEDNYIVLNKDDNEECGDICPGTAKGKTNCPATVI
REMARK   3  ALN B TRG NGQFVERCWTHSHCQKVCPTICKSHGCTAEGLCCHSECLGNCSQPDDPTKCVACRNFY
REMARK   3  ALN B TRG LDGRCVETCPPPYYHFQDWRCVNFSFCQDLHHKCKNSRRQGCHQYVIHNNKCIPECPS
REMARK   3  ALN B TRG GYTMNSSNLLCTPCLGPCPKVCHLLEGEKTIDSVTSAQELRGCTVINGSLIINIRGGN
REMARK   3  ALN B TRG NLAAELEANLGLIEEISGYLKIRRSYALVSLSFFRKLRLIRGETLEIGNYSFYALDNQ
REMARK   3  ALN B TRG NLRQLWDWSKHNLTITQGKLFFHYNPKLCLSEIHKMEEVSGTKGRQERNDIALKTNGD
REMARK   3  ALN B TRG QASCENELLKFSYIRTSFDKILLRWEPYWPPDFRDLLGFMLFYKEAPYQNVTEFDGQD
REMARK   3  ALN B TRG ACGSNSWTVVDIDPPLRSNDPKSQNHPGWLMRGLKPWTQYAIFVKTLVTFSDERRTYG
REMARK   3  ALN B TRG AKSDIIYVQTDATNPSVPLDPISVSNSSSQIILKWKPPSDPNGNITHYLVFWERQAED
REMARK   3  ALN B TRG SELFELDYCLKGLKLPSRTWSPPFESEDSQKHNQSEYEDSAGECCSCPKTDSQILKEL
REMARK   3  ALN B TRG EESSFRKTFEDYLHNVVFVPRPSRKRRSLGDVGNVTVAVPTVAAFPNTSSTSVPTSPE
REMARK   3  ALN B TRG EHRPFEKVVNKESLVISGLRHFTGYRIELQACNQDTPEERCSVAAYVSARTMPEAKAD
REMARK   3  ALN B TRG DIVGPVTHEIFENNVVHLMWQEPKEPNGLIVLYEVSYRRYGDEELHLCVSRKHFALER
REMARK   3  ALN B TRG GCRLRGLSPGNYSVRIRATSLAGNGSWTEPTYFYVTDYLDVPSNIAKIIIGPLIFVFL
REMARK   3  ALN B TRG FSVVIGSIYLFLRKRQPDGPLGPLYASSNPEFLTASDVFPCSVYVPDEWEVSREKITL
REMARK   3  ALN B TRG LRELGQGSFGMVYEGNARDIIKGEAETRVAVKTVNESASLRERIEFLNEASVMKGFTC
REMARK   3  ALN B TRG HHVVRLLGVVSKGQPTLVVMELMAHGDLKSYLRSLRPEAENNPGRPPPTLQEMIQMAA
REMARK   3  ALN B TRG EIADGMAYLNAKKFVHRNLAARNCMVAHDFTVKIGDFGMTRDIYETDYYRKGGKGLLP
REMARK   3  ALN B TRG VRWMAPESLKDGVFTTSSDMWSFGVVLWEITSLAEQPYQGLSNEQVLKFVMDGGYLDQ
REMARK   3  ALN B TRG PDNCPERVTDLMRMCWQFNPKMRPTFLEIVNLLKDDLHPSFPEVSFFHSEENKAPESE
REMARK   3  ALN B TRG ELEMEFEDMENVPLDRSSHCQREEAGGRDGGSSLGFKRSYEEHIPYTHMNGGKKNGAA
REMARK   3  ALN B TRG ATAPRSNPSLESSGLEVLFQ
REMARK   3  ALN B TPL HLYPGEVCPGMDIRNNLTRLHELENCSVIEGHLQILLMFKTRPEDFRDLSFPKLIMIT
REMARK   3  ALN B TPL DYLLLFRVYGLESLKDLFPNLTVIRGSRLFFNYALVIFEMVHLKELGLYNLMNITRGS
REMARK   3  ALN B TPL VRIEKNNELCYLATIDWSRILDSVEDNYIVLNKDDNEECGDICPGTAKGKTNCPATVI
REMARK   3  ALN B TPL NGQFVERCWTHSHCQKVCPTICKSHGCTAEGLCCHSECLGNCSQPDDPTKCVACRNFY
REMARK   3  ALN B TPL LDGRCVETCPPPYYHFQDWRCVNFSFCQDLHHKCKNSRRQGCHQYVIHNNKCIPECPS
REMARK   3  ALN B TPL GYTMNSSNLLCTPCLGPCPKVCHLLEGEKTIDSVTSAQELRGCTVINGSLIINIRGGN
REMARK   3  ALN B TPL NLAAELEANLGLIEEISGYLKIRRSYALVSLSFFRKLRLIRGETLEIGNYSFYALDNQ
REMARK   3  ALN B TPL NLRQLWDWSKHNLTITQGKLFFHYNPKLCLSEIHKMEEVSGTKGRQERNDIALKTNGD
REMARK   3  ALN B TPL QASCENELLKFSYIRTSFDKILLRWEPYWPPDFRDLLGFMLFYKEAPYQNVTEFDGQD
REMARK   3  ALN B TPL ACGSNSWTVVDIDPPLRSNDPKSQNHPGWLMRGLKPWTQYAIFVKTLVTFSDERRTYG
REMARK   3  ALN B TPL AKSDIIYVQTDATNPSVPLDPISVSNSSSQIILKWKPPSDPNGNITHYLVFWERQAED
REMARK   3  ALN B TPL SELFELDYCLKGLKLPSRTWSPPFESEDSQKHNQSEYEDSAGECCSCPKTDSQILKEL
REMARK   3  ALN B TPL EESSFRKTFEDYLHNVVFVPRPSRKRRSLGDVGNVTVAVPTVAAFPNTSSTSVPTSPE
REMARK   3  ALN B TPL EHRPFEKVVNKESLVISGLRHFTGYRIELQACNQDTPEERCSVAAYVSARTMPEAKAD
REMARK   3  ALN B TPL DIVGPVTHEIFENNVVHLMWQEPKEPNGLIVLYEVSYRRYGDEELHLCVSRKHFALER
REMARK   3  ALN B TPL GCRLRGLSPGNYSVRIRATSLAGNGSWTEPTYFYVTDYLDVPSNIAKIIIGPLIFVFL
REMARK   3  ALN B TPL FSVVIGSIYLFLRKRQPDGPLGPLYASSNPEFLTASDVFPCSVYVPDEWEVSREKITL
REMARK   3  ALN B TPL LRELGQGSFGMVYEGNARDIIKGEAETRVAVKTVNESASLRERIEFLNEASVMKGFTC
REMARK   3  ALN B TPL HHVVRLLGVVSKGQPTLVVMELMAHGDLKSYLRSLRPEAENNPGRPPPTLQEMIQMAA
REMARK   3  ALN B TPL EIADGMAYLNAKKFVHRNLAARNCMVAHDFTVKIGDFGMTRDIYETDYYRKGGKGLLP
REMARK   3  ALN B TPL VRWMAPESLKDGVFTTSSDMWSFGVVLWEITSLAEQPYQGLSNEQVLKFVMDGGYLDQ
REMARK   3  ALN B TPL PDNCPERVTDLMRMCWQFNPKMRPTFLEIVNLLKDDLHPSFPEVSFFHSEENKAPESE
REMARK   3  ALN B TPL ELEMEFEDMENVPLDRSSHCQREEAGGRDGGSSLGFKRSYEEHIPYTHMNGGKKNGAA
REMARK   3  ALN B TPL ATAPRSNPS-----------
REMARK   3  ALN B OFF 0
HELIX    1   1 THR A   18  LEU A   23  1                                   6
HELIX    2   2 TRP A  133  ARG A  135  1                                   3
HELIX    3   3 PHE A  256  LYS A  267  1                                  12
HELIX    4   4 LEU A  315  GLY A  317  1                                   3
HELIX    5   5 VAL A  324  LEU A  330  1                                   7
HELIX    6   6 ALA A  351  ASN A  357  1                                   7
HELIX    7   7 LEU A  436  SER A  446  1                                  11
HELIX    8   8 PHE A  497  ASP A  499  1                                   3
HELIX    9   9 GLU A  640  PHE A  642  1                                   3
HELIX   10  10 ILE A  692  VAL A  713  1                                  22
HELIX   11  11 ARG A  863  GLU A  869  1                                   7
HELIX   12  12 THR B   18  LEU B   23  1                                   6
HELIX   13  13 TRP B  133  ARG B  135  1                                   3
HELIX   14  14 PHE B  256  LYS B  267  1                                  12
HELIX   15  15 LEU B  315  GLY B  317  1                                   3
HELIX   16  16 VAL B  324  LEU B  330  1                                   7
HELIX   17  17 ALA B  351  ASN B  357  1                                   7
HELIX   18  18 LEU B  436  SER B  446  1                                  11
HELIX   19  19 PHE B  497  ASP B  499  1                                   3
HELIX   20  20 SER B  639  PHE B  642  1                                   4
HELIX   21  21 ILE B  692  VAL B  713  1                                  22
HELIX   22  22 ARG B  863  GLU B  869  1                                   7
HELIX   23  23 GLY C    8  VAL C   18  1                                  11
HELIX   24  24 ARG C   32  GLU C   35  1                                   4
HELIX   25  25 VAL C   56  CYS C   59  1                                   4
HELIX   26  26 LEU C   66  TYR C   72  1                                   7
HELIX   27  27 GLY D    8  VAL D   18  1                                  11
HELIX   28  28 VAL D   56  THR D   61  1                                   6
HELIX   29  29 LEU D   66  TYR D   72  1                                   7
HELIX   30  30 GLY E    8  VAL E   18  1                                  11
HELIX   31  31 ILE E   55  THR E   61  1                                   7
HELIX   32  32 LEU E   66  TYR E   72  1                                   7
HELIX   33  33 GLY F    8  TYR F   16  1                                   9
HELIX   34  34 GLY F   54  THR F   61  1                                   8
HELIX   35  35 LEU F   66  TYR F   72  1                                   7
SHEET    1   1 1 MET A  11  ARG A  14  0
SHEET    2   2 1 LEU A  33  LEU A  36  0
SHEET    3   3 1 LEU A  61  PHE A  64  0
SHEET    4   4 1 TYR A  91  PHE A  96  0
SHEET    5   5 1 SER A 116  GLU A 120  0
SHEET    6   6 1 TYR A 144  VAL A 146  0
SHEET    7   7 1 ALA A 171  VAL A 173  0
SHEET    8   8 1 PHE A 178  GLU A 180  0
SHEET    9   9 1 PHE A 231  LEU A 233  0
SHEET   10  10 1 ARG A 236  VAL A 238  0
SHEET   11  11 1 TYR A 245  PHE A 248  0
SHEET   12  12 1 ARG A 252  ASN A 255  0
SHEET   13  13 1 VAL A 278  HIS A 280  0
SHEET   14  14 1 LYS A 283  ILE A 285  0
SHEET   15  15 1 TYR A 292  MET A 294  0
SHEET   16  16 1 CYS A 301  PRO A 303  0
SHEET   17  17 1 VAL A 311  HIS A 313  0
SHEET   18  18 1 GLU A 318  ILE A 321  0
SHEET   19  19 1 VAL A 335  ASN A 337  0
SHEET   20  20 1 SER A 339  ILE A 342  0
SHEET   21  21 1 LEU A 368  ARG A 371  0
SHEET   22  22 1 TYR A 398  LEU A 403  0
SHEET   23  23 1 LYS A 425  HIS A 429  0
SHEET   24  24 1 PHE A 475  SER A 481  0
SHEET   25  25 1 LYS A 484  TRP A 489  0
SHEET   26  26 1 LEU A 500  GLU A 509  0
SHEET   27  27 1 THR A 530  ILE A 534  0
SHEET   28  28 1 TRP A 551  ARG A 554  0
SHEET   29  29 1 GLN A 561  VAL A 570  0
SHEET   30  30 1 ILE A 586  GLN A 589  0
SHEET   31  31 1 ILE A 602  SER A 605  0
SHEET   32  32 1 ILE A 611  LYS A 614  0
SHEET   33  33 1 HIS A 627  ARG A 634  0
SHEET   34  34 1 PHE A 759  VAL A 762  0
SHEET   35  35 1 SER A 767  ILE A 770  0
SHEET   36  36 1 GLY A 778  CYS A 786  0
SHEET   37  37 1 ALA A 799  ARG A 804  0
SHEET   38  38 1 THR A 819  ILE A 822  0
SHEET   39  39 1 VAL A 828  MET A 831  0
SHEET   40  40 1 ILE A 842  ARG A 851  0
SHEET   41  41 1 LEU A 857  SER A 862  0
SHEET   42  42 1 CYS A 872  LEU A 874  0
SHEET   43  43 1 GLY A 880  SER A 890  0
SHEET   44  44 1 THR A 901  VAL A 905  0
SHEET   45  45 1 MET B  11  ARG B  14  0
SHEET   46  46 1 LEU B  33  LEU B  36  0
SHEET   47  47 1 LEU B  61  PHE B  64  0
SHEET   48  48 1 TYR B  91  PHE B  96  0
SHEET   49  49 1 SER B 116  GLU B 120  0
SHEET   50  50 1 TYR B 144  VAL B 146  0
SHEET   51  51 1 ALA B 171  VAL B 173  0
SHEET   52  52 1 PHE B 178  GLU B 180  0
SHEET   53  53 1 PHE B 231  LEU B 233  0
SHEET   54  54 1 ARG B 236  VAL B 238  0
SHEET   55  55 1 TYR B 245  PHE B 248  0
SHEET   56  56 1 ARG B 252  ASN B 255  0
SHEET   57  57 1 VAL B 278  HIS B 280  0
SHEET   58  58 1 LYS B 283  ILE B 285  0
SHEET   59  59 1 TYR B 292  MET B 294  0
SHEET   60  60 1 CYS B 301  PRO B 303  0
SHEET   61  61 1 VAL B 311  HIS B 313  0
SHEET   62  62 1 GLU B 318  ILE B 321  0
SHEET   63  63 1 VAL B 335  ASN B 337  0
SHEET   64  64 1 SER B 339  ILE B 342  0
SHEET   65  65 1 LEU B 368  ARG B 371  0
SHEET   66  66 1 TYR B 398  LEU B 403  0
SHEET   67  67 1 LYS B 425  HIS B 429  0
SHEET   68  68 1 PHE B 475  SER B 481  0
SHEET   69  69 1 LYS B 484  TRP B 489  0
SHEET   70  70 1 LEU B 500  GLU B 509  0
SHEET   71  71 1 THR B 530  ILE B 534  0
SHEET   72  72 1 TRP B 551  ARG B 554  0
SHEET   73  73 1 GLN B 561  VAL B 570  0
SHEET   74  74 1 ILE B 586  GLN B 589  0
SHEET   75  75 1 ILE B 602  SER B 605  0
SHEET   76  76 1 ILE B 611  LYS B 614  0
SHEET   77  77 1 HIS B 627  ARG B 634  0
SHEET   78  78 1 PHE B 759  VAL B 762  0
SHEET   79  79 1 SER B 767  ILE B 770  0
SHEET   80  80 1 GLY B 778  CYS B 786  0
SHEET   81  81 1 ALA B 799  ARG B 804  0
SHEET   82  82 1 THR B 819  ILE B 822  0
SHEET   83  83 1 VAL B 828  MET B 831  0
SHEET   84  84 1 ILE B 842  ARG B 851  0
SHEET   85  85 1 LEU B 857  SER B 862  0
SHEET   86  86 1 CYS B 872  LEU B 874  0
SHEET   87  87 1 GLY B 880  SER B 890  0
SHEET   88  88 1 THR B 901  VAL B 905  0
ATOM      1  N   HIS A   1     211.082 122.727 121.484  1.00  0.52           N
ATOM      2  CA  HIS A   1     211.054 121.360 120.890  1.00  0.52           C
ATOM      3  C   HIS A   1     210.758 121.424 119.417  1.00  0.52           C
ATOM      4  O   HIS A   1     210.322 122.459 118.923  1.00  0.52           O
ATOM      5  CB  HIS A   1     209.995 120.512 121.633  1.00  0.52           C
ATOM      6  CG  HIS A   1     210.451 120.251 123.027  1.00  0.52           C
ATOM      7  ND1 HIS A   1     211.524 119.405 123.175  1.00  0.52           N
ATOM      8  CD2 HIS A   1     210.119 120.812 124.219  1.00  0.52           C
ATOM      9  CE1 HIS A   1     211.819 119.442 124.459  1.00  0.52           C
ATOM     10  NE2 HIS A   1     211.006 120.288 125.135  1.00  0.52           N
ATOM     11  HA  HIS A   1     212.032 120.899 121.030  1.00  0.00           H
ATOM     12  HB2 HIS A   1     209.859 119.564 121.112  1.00  0.00           H
ATOM     13  HB3 HIS A   1     209.048 121.052 121.656  1.00  0.00           H
ATOM     14  HD2 HIS A   1     209.326 121.520 124.409  1.00  0.00           H
ATOM     15  HE1 HIS A   1     212.612 118.868 124.916  1.00  0.00           H
ATOM     16  H1  HIS A   1     211.028 123.415 120.747  1.00  0.00           H
ATOM     17  H2  HIS A   1     211.941 122.853 122.000  1.00  0.00           H
ATOM     18  H3  HIS A   1     210.296 122.839 122.108  1.00  0.00           H
ATOM     19  HE2 HIS A   1     211.043 120.496 126.123  1.00  0.00           H
ATOM     20  N   LEU A   2     210.962 120.322 118.669  1.00  0.53           N
ATOM     21  CA  LEU A   2     210.411 120.207 117.331  1.00  0.53           C
ATOM     22  C   LEU A   2     208.920 119.928 117.452  1.00  0.53           C
ATOM     23  O   LEU A   2     208.428 119.596 118.529  1.00  0.53           O
ATOM     24  CB  LEU A   2     211.059 119.069 116.490  1.00  0.53           C
ATOM     25  CG  LEU A   2     212.473 119.363 115.940  1.00  0.53           C
ATOM     26  CD1 LEU A   2     213.577 119.228 116.999  1.00  0.53           C
ATOM     27  CD2 LEU A   2     212.780 118.433 114.755  1.00  0.53           C
ATOM     28  H   LEU A   2     211.509 119.561 119.047  1.00  0.00           H
ATOM     29  HA  LEU A   2     210.551 121.154 116.810  1.00  0.00           H
ATOM     30  HB2 LEU A   2     211.123 118.182 117.120  1.00  0.00           H
ATOM     31  HB3 LEU A   2     210.402 118.847 115.649  1.00  0.00           H
ATOM     32  HG  LEU A   2     212.484 120.389 115.573  1.00  0.00           H
ATOM     33 HD11 LEU A   2     213.358 119.888 117.839  1.00  0.00           H
ATOM     34 HD12 LEU A   2     213.620 118.197 117.349  1.00  0.00           H
ATOM     35 HD13 LEU A   2     214.536 119.503 116.561  1.00  0.00           H
ATOM     36 HD21 LEU A   2     211.996 118.530 114.004  1.00  0.00           H
ATOM     37 HD22 LEU A   2     212.823 117.401 115.105  1.00  0.00           H
ATOM     38 HD23 LEU A   2     213.739 118.708 114.316  1.00  0.00           H
ATOM     39  N   TYR A   3     208.167 120.046 116.349  1.00  0.67           N
ATOM     40  CA  TYR A   3     206.807 119.551 116.295  1.00  0.67           C
ATOM     41  C   TYR A   3     206.787 118.105 115.793  1.00  0.67           C
ATOM     42  O   TYR A   3     207.067 117.880 114.616  1.00  0.67           O
ATOM     43  CB  TYR A   3     205.941 120.413 115.334  1.00  0.67           C
ATOM     44  CG  TYR A   3     205.680 121.807 115.856  1.00  0.67           C
ATOM     45  CD1 TYR A   3     205.373 122.064 117.207  1.00  0.67           C
ATOM     46  CD2 TYR A   3     205.675 122.884 114.953  1.00  0.67           C
ATOM     47  CE1 TYR A   3     205.101 123.368 117.647  1.00  0.67           C
ATOM     48  CE2 TYR A   3     205.399 124.188 115.392  1.00  0.67           C
ATOM     49  CZ  TYR A   3     205.115 124.430 116.740  1.00  0.67           C
ATOM     50  OH  TYR A   3     204.826 125.741 117.174  1.00  0.67           O
ATOM     51  H   TYR A   3     208.559 120.493 115.533  1.00  0.00           H
ATOM     52  HA  TYR A   3     206.374 119.588 117.295  1.00  0.00           H
ATOM     53  HB2 TYR A   3     206.459 120.493 114.378  1.00  0.00           H
ATOM     54  HB3 TYR A   3     204.986 119.912 115.176  1.00  0.00           H
ATOM     55  HD1 TYR A   3     205.347 121.247 117.913  1.00  0.00           H
ATOM     56  HD2 TYR A   3     205.886 122.706 113.909  1.00  0.00           H
ATOM     57  HE1 TYR A   3     204.881 123.551 118.688  1.00  0.00           H
ATOM     58  HE2 TYR A   3     205.406 125.007 114.687  1.00  0.00           H
ATOM     59  HH  TYR A   3     204.052 126.068 116.711  1.00  0.00           H
ATOM     60  N   PRO A   4     206.448 117.091 116.594  1.00  0.71           N
ATOM     61  CA  PRO A   4     206.328 115.735 116.075  1.00  0.71           C
ATOM     62  C   PRO A   4     204.891 115.526 115.629  1.00  0.71           C
ATOM     63  O   PRO A   4     203.982 115.400 116.447  1.00  0.71           O
ATOM     64  CB  PRO A   4     206.685 114.843 117.283  1.00  0.71           C
ATOM     65  CG  PRO A   4     206.302 115.682 118.507  1.00  0.71           C
ATOM     66  CD  PRO A   4     206.624 117.103 118.051  1.00  0.71           C
ATOM     67  HA  PRO A   4     207.021 115.570 115.250  1.00  0.00           H
ATOM     68  HB2 PRO A   4     206.114 113.915 117.258  1.00  0.00           H
ATOM     69  HB3 PRO A   4     207.754 114.629 117.291  1.00  0.00           H
ATOM     70  HG2 PRO A   4     205.243 115.575 118.742  1.00  0.00           H
ATOM     71  HG3 PRO A   4     206.914 115.408 119.366  1.00  0.00           H
ATOM     72  HD2 PRO A   4     207.650 117.363 118.309  1.00  0.00           H
ATOM     73  HD3 PRO A   4     205.931 117.810 118.507  1.00  0.00           H
ATOM     74  N   GLY A   5     204.664 115.483 114.307  1.00  0.79           N
ATOM     75  CA  GLY A   5     203.332 115.383 113.740  1.00  0.79           C
ATOM     76  C   GLY A   5     203.171 116.345 112.607  1.00  0.79           C
ATOM     77  O   GLY A   5     204.066 117.113 112.267  1.00  0.79           O
ATOM     78  H   GLY A   5     205.454 115.522 113.680  1.00  0.00           H
ATOM     79  HA2 GLY A   5     203.173 114.369 113.374  1.00  0.00           H
ATOM     80  HA3 GLY A   5     202.595 115.607 114.511  1.00  0.00           H
ATOM     81  N   GLU A   6     202.002 116.286 111.967  1.00  0.77           N
ATOM     82  CA  GLU A   6     201.697 116.989 110.746  1.00  0.77           C
ATOM     83  C   GLU A   6     201.056 118.345 110.999  1.00  0.77           C
ATOM     84  O   GLU A   6     200.730 118.723 112.126  1.00  0.77           O
ATOM     85  CB  GLU A   6     200.803 116.109 109.851  1.00  0.77           C
ATOM     86  CG  GLU A   6     201.487 114.776 109.455  1.00  0.77           C
ATOM     87  CD  GLU A   6     200.530 113.841 108.723  1.00  0.77           C
ATOM     88  OE1 GLU A   6     199.406 114.286 108.383  1.00  0.77           O
ATOM     89  OE2 GLU A   6     200.921 112.664 108.525  1.00  0.77           O
ATOM     90  H   GLU A   6     201.278 115.707 112.367  1.00  0.00           H
ATOM     91  HA  GLU A   6     202.635 117.158 110.216  1.00  0.00           H
ATOM     92  HB2 GLU A   6     199.883 115.883 110.391  1.00  0.00           H
ATOM     93  HB3 GLU A   6     200.555 116.662 108.945  1.00  0.00           H
ATOM     94  HG2 GLU A   6     201.842 114.280 110.359  1.00  0.00           H
ATOM     95  HG3 GLU A   6     202.338 114.991 108.809  1.00  0.00           H
ATOM     96  N   VAL A   7     200.901 119.125 109.907  1.00  0.83           N
ATOM     97  CA  VAL A   7     200.507 120.528 109.926  1.00  0.83           C
ATOM     98  C   VAL A   7     199.016 120.708 109.635  1.00  0.83           C
ATOM     99  O   VAL A   7     198.501 121.821 109.617  1.00  0.83           O
ATOM    100  CB  VAL A   7     201.329 121.329 108.905  1.00  0.83           C
ATOM    101  CG1 VAL A   7     201.348 122.817 109.299  1.00  0.83           C
ATOM    102  CG2 VAL A   7     202.784 120.815 108.842  1.00  0.83           C
ATOM    103  H   VAL A   7     201.072 118.702 109.006  1.00  0.00           H
ATOM    104  HA  VAL A   7     200.712 120.927 110.919  1.00  0.00           H
ATOM    105  HB  VAL A   7     200.872 121.227 107.921  1.00  0.00           H
ATOM    106 HG21 VAL A   7     203.422 121.581 108.401  1.00  0.00           H
ATOM    107 HG22 VAL A   7     202.824 119.913 108.232  1.00  0.00           H
ATOM    108 HG23 VAL A   7     203.133 120.588 109.849  1.00  0.00           H
ATOM    109 HG11 VAL A   7     200.326 123.194 109.347  1.00  0.00           H
ATOM    110 HG12 VAL A   7     201.823 122.928 110.274  1.00  0.00           H
ATOM    111 HG13 VAL A   7     201.909 123.383 108.555  1.00  0.00           H
ATOM    112  N   CYS A   8     198.293 119.584 109.432  1.00  0.84           N
ATOM    113  CA  CYS A   8     196.843 119.445 109.291  1.00  0.84           C
ATOM    114  C   CYS A   8     195.995 120.664 108.905  1.00  0.84           C
ATOM    115  O   CYS A   8     195.612 121.426 109.795  1.00  0.84           O
ATOM    116  CB  CYS A   8     196.259 118.860 110.591  1.00  0.84           C
ATOM    117  SG  CYS A   8     196.917 117.205 110.924  1.00  0.84           S
ATOM    118  H   CYS A   8     198.824 118.727 109.369  1.00  0.00           H
ATOM    119  HA  CYS A   8     196.679 118.697 108.515  1.00  0.00           H
ATOM    120  HB2 CYS A   8     195.175 118.798 110.496  1.00  0.00           H
ATOM    121  HB3 CYS A   8     196.509 119.518 111.423  1.00  0.00           H
ATOM    122  HG  CYS A   8     197.887 116.926 110.048  1.00  0.00           H
ATOM    123  N   PRO A   9     195.678 120.905 107.627  1.00  0.85           N
ATOM    124  CA  PRO A   9     194.677 121.888 107.211  1.00  0.85           C
ATOM    125  C   PRO A   9     193.361 121.852 107.977  1.00  0.85           C
ATOM    126  O   PRO A   9     192.895 120.765 108.315  1.00  0.85           O
ATOM    127  CB  PRO A   9     194.475 121.629 105.707  1.00  0.85           C
ATOM    128  CG  PRO A   9     195.763 120.926 105.269  1.00  0.85           C
ATOM    129  CD  PRO A   9     196.121 120.090 106.495  1.00  0.85           C
ATOM    130  HA  PRO A   9     195.110 122.882 107.328  1.00  0.00           H
ATOM    131  HB2 PRO A   9     193.609 120.989 105.538  1.00  0.00           H
ATOM    132  HB3 PRO A   9     194.358 122.572 105.173  1.00  0.00           H
ATOM    133  HG2 PRO A   9     195.589 120.293 104.399  1.00  0.00           H
ATOM    134  HG3 PRO A   9     196.546 121.656 105.061  1.00  0.00           H
ATOM    135  HD2 PRO A   9     197.196 119.914 106.542  1.00  0.00           H
ATOM    136  HD3 PRO A   9     195.583 119.142 106.477  1.00  0.00           H
ATOM    137  N   GLY A  10     192.763 123.031 108.260  1.00  0.86           N
ATOM    138  CA  GLY A  10     191.491 123.182 108.974  1.00  0.86           C
ATOM    139  C   GLY A  10     190.355 122.258 108.583  1.00  0.86           C
ATOM    140  O   GLY A  10     190.139 121.956 107.410  1.00  0.86           O
ATOM    141  H   GLY A  10     193.229 123.874 107.956  1.00  0.00           H
ATOM    142  HA2 GLY A  10     191.691 123.023 110.034  1.00  0.00           H
ATOM    143  HA3 GLY A  10     191.151 124.209 108.844  1.00  0.00           H
ATOM    144  N   MET A  11     189.554 121.807 109.567  1.00  0.79           N
ATOM    145  CA  MET A  11     188.651 120.693 109.348  1.00  0.79           C
ATOM    146  C   MET A  11     187.320 120.830 110.074  1.00  0.79           C
ATOM    147  O   MET A  11     187.183 121.466 111.120  1.00  0.79           O
ATOM    148  CB  MET A  11     189.325 119.329 109.678  1.00  0.79           C
ATOM    149  CG  MET A  11     189.776 119.142 111.141  1.00  0.79           C
ATOM    150  SD  MET A  11     190.535 117.518 111.480  1.00  0.79           S
ATOM    151  CE  MET A  11     192.147 117.796 110.688  1.00  0.79           C
ATOM    152  H   MET A  11     189.582 122.252 110.473  1.00  0.00           H
ATOM    153  HA  MET A  11     188.425 120.680 108.282  1.00  0.00           H
ATOM    154  HB2 MET A  11     188.612 118.538 109.444  1.00  0.00           H
ATOM    155  HB3 MET A  11     190.195 119.210 109.032  1.00  0.00           H
ATOM    156  HG2 MET A  11     188.904 119.254 111.786  1.00  0.00           H
ATOM    157  HG3 MET A  11     190.496 119.923 111.387  1.00  0.00           H
ATOM    158  HE1 MET A  11     192.762 116.902 110.791  1.00  0.00           H
ATOM    159  HE2 MET A  11     192.647 118.638 111.167  1.00  0.00           H
ATOM    160  HE3 MET A  11     191.999 118.015 109.631  1.00  0.00           H
ATOM    161  N   ASP A  12     186.282 120.211 109.473  1.00  0.83           N
ATOM    162  CA  ASP A  12     184.921 120.164 109.964  1.00  0.83           C
ATOM    163  C   ASP A  12     184.591 118.695 110.190  1.00  0.83           C
ATOM    164  O   ASP A  12     184.767 117.848 109.304  1.00  0.83           O
ATOM    165  CB  ASP A  12     183.952 120.914 108.981  1.00  0.83           C
ATOM    166  CG  ASP A  12     182.587 120.270 108.745  1.00  0.83           C
ATOM    167  OD1 ASP A  12     181.551 120.826 109.176  1.00  0.83           O
ATOM    168  OD2 ASP A  12     182.586 119.197 108.072  1.00  0.83           O
ATOM    169  H   ASP A  12     186.472 119.737 108.601  1.00  0.00           H
ATOM    170  HA  ASP A  12     184.889 120.672 110.928  1.00  0.00           H
ATOM    171  HB2 ASP A  12     184.453 120.990 108.016  1.00  0.00           H
ATOM    172  HB3 ASP A  12     183.792 121.922 109.363  1.00  0.00           H
ATOM    173  N   ILE A  13     184.120 118.383 111.408  1.00  0.82           N
ATOM    174  CA  ILE A  13     183.791 117.044 111.839  1.00  0.82           C
ATOM    175  C   ILE A  13     182.372 117.075 112.378  1.00  0.82           C
ATOM    176  O   ILE A  13     182.045 117.821 113.300  1.00  0.82           O
ATOM    177  CB  ILE A  13     184.777 116.561 112.895  1.00  0.82           C
ATOM    178  CG1 ILE A  13     186.213 116.521 112.313  1.00  0.82           C
ATOM    179  CG2 ILE A  13     184.362 115.167 113.417  1.00  0.82           C
ATOM    180  CD1 ILE A  13     187.295 116.399 113.386  1.00  0.82           C
ATOM    181  H   ILE A  13     183.987 119.136 112.068  1.00  0.00           H
ATOM    182  HA  ILE A  13     183.831 116.373 110.981  1.00  0.00           H
ATOM    183  HB  ILE A  13     184.761 117.262 113.730  1.00  0.00           H
ATOM    184 HG12 ILE A  13     186.291 115.665 111.643  1.00  0.00           H
ATOM    185 HG13 ILE A  13     186.386 117.432 111.741  1.00  0.00           H
ATOM    186 HG21 ILE A  13     185.075 114.834 114.171  1.00  0.00           H
ATOM    187 HG22 ILE A  13     184.351 114.458 112.589  1.00  0.00           H
ATOM    188 HG23 ILE A  13     183.367 115.226 113.859  1.00  0.00           H
ATOM    189 HD11 ILE A  13     188.276 116.376 112.912  1.00  0.00           H
ATOM    190 HD12 ILE A  13     187.143 115.480 113.952  1.00  0.00           H
ATOM    191 HD13 ILE A  13     187.237 117.254 114.060  1.00  0.00           H
ATOM    192  N   ARG A  14     181.476 116.260 111.787  1.00  0.70           N
ATOM    193  CA  ARG A  14     180.058 116.300 112.083  1.00  0.70           C
ATOM    194  C   ARG A  14     179.490 114.914 112.216  1.00  0.70           C
ATOM    195  O   ARG A  14     180.039 113.956 111.671  1.00  0.70           O
ATOM    196  CB  ARG A  14     179.217 116.937 110.946  1.00  0.70           C
ATOM    197  CG  ARG A  14     179.505 118.410 110.666  1.00  0.70           C
ATOM    198  CD  ARG A  14     178.558 118.972 109.609  1.00  0.70           C
ATOM    199  NE  ARG A  14     178.953 120.392 109.468  1.00  0.70           N
ATOM    200  CZ  ARG A  14     178.151 121.383 109.082  1.00  0.70           C
ATOM    201  NH1 ARG A  14     176.939 121.170 108.581  1.00  0.70           N
ATOM    202  NH2 ARG A  14     178.620 122.622 109.105  1.00  0.70           N
ATOM    203  H   ARG A  14     181.808 115.591 111.107  1.00  0.00           H
ATOM    204  HA  ARG A  14     179.895 116.851 113.009  1.00  0.00           H
ATOM    205  HB2 ARG A  14     178.165 116.845 111.214  1.00  0.00           H
ATOM    206  HB3 ARG A  14     179.390 116.372 110.030  1.00  0.00           H
ATOM    207  HG2 ARG A  14     179.382 118.977 111.589  1.00  0.00           H
ATOM    208  HG3 ARG A  14     180.532 118.513 110.317  1.00  0.00           H
ATOM    209  HD2 ARG A  14     178.680 118.443 108.664  1.00  0.00           H
ATOM    210  HD3 ARG A  14     177.526 118.900 109.951  1.00  0.00           H
ATOM    211  HE  ARG A  14     179.911 120.629 109.683  1.00  0.00           H
ATOM    212 HH11 ARG A  14     176.577 120.229 108.517  1.00  0.00           H
ATOM    213 HH12 ARG A  14     176.380 121.949 108.264  1.00  0.00           H
ATOM    214 HH21 ARG A  14     179.553 122.803 109.446  1.00  0.00           H
ATOM    215 HH22 ARG A  14     178.044 123.386 108.781  1.00  0.00           H
ATOM    216  N   ASN A  15     178.325 114.821 112.900  1.00  0.75           N
ATOM    217  CA  ASN A  15     177.384 113.708 112.876  1.00  0.75           C
ATOM    218  C   ASN A  15     177.773 112.554 113.773  1.00  0.75           C
ATOM    219  O   ASN A  15     176.958 112.039 114.535  1.00  0.75           O
ATOM    220  CB  ASN A  15     177.050 113.190 111.446  1.00  0.75           C
ATOM    221  CG  ASN A  15     176.636 114.349 110.554  1.00  0.75           C
ATOM    222  OD1 ASN A  15     177.294 114.688 109.572  1.00  0.75           O
ATOM    223  ND2 ASN A  15     175.529 115.030 110.923  1.00  0.75           N
ATOM    224  H   ASN A  15     178.083 115.605 113.489  1.00  0.00           H
ATOM    225  HA  ASN A  15     176.449 114.098 113.279  1.00  0.00           H
ATOM    226  HB2 ASN A  15     177.931 112.706 111.023  1.00  0.00           H
ATOM    227  HB3 ASN A  15     176.234 112.469 111.504  1.00  0.00           H
ATOM    228 HD21 ASN A  15     175.012 114.748 111.744  1.00  0.00           H
ATOM    229 HD22 ASN A  15     175.218 115.822 110.378  1.00  0.00           H
ATOM    230  N   ASN A  16     179.039 112.135 113.700  1.00  0.73           N
ATOM    231  CA  ASN A  16     179.556 110.991 114.398  1.00  0.73           C
ATOM    232  C   ASN A  16     181.066 111.132 114.505  1.00  0.73           C
ATOM    233  O   ASN A  16     181.679 112.033 113.939  1.00  0.73           O
ATOM    234  CB  ASN A  16     179.112 109.653 113.728  1.00  0.73           C
ATOM    235  CG  ASN A  16     179.355 109.622 112.217  1.00  0.73           C
ATOM    236  OD1 ASN A  16     180.155 110.353 111.638  1.00  0.73           O
ATOM    237  ND2 ASN A  16     178.641 108.704 111.526  1.00  0.73           N
ATOM    238  H   ASN A  16     179.675 112.657 113.115  1.00  0.00           H
ATOM    239  HA  ASN A  16     179.149 111.007 115.409  1.00  0.00           H
ATOM    240  HB2 ASN A  16     178.047 109.512 113.910  1.00  0.00           H
ATOM    241  HB3 ASN A  16     179.659 108.831 114.189  1.00  0.00           H
ATOM    242 HD21 ASN A  16     177.991 108.101 112.010  1.00  0.00           H
ATOM    243 HD22 ASN A  16     178.757 108.622 110.526  1.00  0.00           H
ATOM    244  N   LEU A  17     181.720 110.237 115.265  1.00  0.77           N
ATOM    245  CA  LEU A  17     183.128 110.371 115.596  1.00  0.77           C
ATOM    246  C   LEU A  17     184.037 109.665 114.594  1.00  0.77           C
ATOM    247  O   LEU A  17     185.228 109.483 114.831  1.00  0.77           O
ATOM    248  CB  LEU A  17     183.386 109.793 117.013  1.00  0.77           C
ATOM    249  CG  LEU A  17     182.563 110.455 118.141  1.00  0.77           C
ATOM    250  CD1 LEU A  17     182.783 109.719 119.467  1.00  0.77           C
ATOM    251  CD2 LEU A  17     182.903 111.937 118.332  1.00  0.77           C
ATOM    252  H   LEU A  17     181.212 109.439 115.620  1.00  0.00           H
ATOM    253  HA  LEU A  17     183.381 111.431 115.604  1.00  0.00           H
ATOM    254  HB2 LEU A  17     184.443 109.921 117.244  1.00  0.00           H
ATOM    255  HB3 LEU A  17     183.161 108.727 116.999  1.00  0.00           H
ATOM    256  HG  LEU A  17     181.507 110.379 117.881  1.00  0.00           H
ATOM    257 HD11 LEU A  17     182.544 108.663 119.341  1.00  0.00           H
ATOM    258 HD12 LEU A  17     183.825 109.821 119.771  1.00  0.00           H
ATOM    259 HD13 LEU A  17     182.138 110.149 120.233  1.00  0.00           H
ATOM    260 HD21 LEU A  17     182.749 112.469 117.393  1.00  0.00           H
ATOM    261 HD22 LEU A  17     183.945 112.034 118.638  1.00  0.00           H
ATOM    262 HD23 LEU A  17     182.257 112.362 119.101  1.00  0.00           H
ATOM    263  N   THR A  18     183.505 109.256 113.423  1.00  0.72           N
ATOM    264  CA  THR A  18     184.218 108.468 112.414  1.00  0.72           C
ATOM    265  C   THR A  18     185.412 109.177 111.799  1.00  0.72           C
ATOM    266  O   THR A  18     186.493 108.610 111.668  1.00  0.72           O
ATOM    267  CB  THR A  18     183.307 108.000 111.282  1.00  0.72           C
ATOM    268  OG1 THR A  18     182.675 109.098 110.639  1.00  0.72           O
ATOM    269  CG2 THR A  18     182.188 107.123 111.862  1.00  0.72           C
ATOM    270  H   THR A  18     182.547 109.511 113.228  1.00  0.00           H
ATOM    271  HA  THR A  18     184.596 107.575 112.912  1.00  0.00           H
ATOM    272  HB  THR A  18     183.885 107.429 110.555  1.00  0.00           H
ATOM    273  HG1 THR A  18     181.730 109.068 110.808  1.00  0.00           H
ATOM    274 HG21 THR A  18     181.535 106.787 111.057  1.00  0.00           H
ATOM    275 HG22 THR A  18     181.609 107.702 112.581  1.00  0.00           H
ATOM    276 HG23 THR A  18     182.626 106.258 112.360  1.00  0.00           H
ATOM    277  N   ARG A  19     185.252 110.470 111.462  1.00  0.72           N
ATOM    278  CA  ARG A  19     186.286 111.274 110.835  1.00  0.72           C
ATOM    279  C   ARG A  19     187.129 112.006 111.863  1.00  0.72           C
ATOM    280  O   ARG A  19     188.054 112.743 111.549  1.00  0.72           O
ATOM    281  CB  ARG A  19     185.647 112.334 109.914  1.00  0.72           C
ATOM    282  CG  ARG A  19     184.999 111.736 108.652  1.00  0.72           C
ATOM    283  CD  ARG A  19     184.370 112.806 107.762  1.00  0.72           C
ATOM    284  NE  ARG A  19     183.117 113.254 108.475  1.00  0.72           N
ATOM    285  CZ  ARG A  19     182.608 114.491 108.453  1.00  0.72           C
ATOM    286  NH1 ARG A  19     181.436 114.739 109.032  1.00  0.72           N
ATOM    287  NH2 ARG A  19     183.272 115.507 107.917  1.00  0.72           N
ATOM    288  H   ARG A  19     184.362 110.906 111.656  1.00  0.00           H
ATOM    289  HA  ARG A  19     186.930 110.626 110.241  1.00  0.00           H
ATOM    290  HB2 ARG A  19     184.880 112.864 110.478  1.00  0.00           H
ATOM    291  HB3 ARG A  19     186.415 113.045 109.611  1.00  0.00           H
ATOM    292  HG2 ARG A  19     184.224 111.033 108.956  1.00  0.00           H
ATOM    293  HG3 ARG A  19     185.759 111.202 108.082  1.00  0.00           H
ATOM    294  HD2 ARG A  19     185.055 113.645 107.636  1.00  0.00           H
ATOM    295  HD3 ARG A  19     184.116 112.382 106.791  1.00  0.00           H
ATOM    296  HE  ARG A  19     182.620 112.560 109.015  1.00  0.00           H
ATOM    297 HH11 ARG A  19     180.919 113.989 109.468  1.00  0.00           H
ATOM    298 HH12 ARG A  19     181.063 115.678 109.035  1.00  0.00           H
ATOM    299 HH21 ARG A  19     184.175 115.352 107.492  1.00  0.00           H
ATOM    300 HH22 ARG A  19     182.875 116.435 107.934  1.00  0.00           H
ATOM    301  N   LEU A  20     186.888 111.781 113.167  1.00  0.79           N
ATOM    302  CA  LEU A  20     187.638 112.452 114.212  1.00  0.79           C
ATOM    303  C   LEU A  20     189.046 111.873 114.348  1.00  0.79           C
ATOM    304  O   LEU A  20     189.954 112.480 114.906  1.00  0.79           O
ATOM    305  CB  LEU A  20     186.811 112.423 115.517  1.00  0.79           C
ATOM    306  CG  LEU A  20     187.390 113.179 116.731  1.00  0.79           C
ATOM    307  CD1 LEU A  20     187.828 114.622 116.448  1.00  0.79           C
ATOM    308  CD2 LEU A  20     186.348 113.200 117.851  1.00  0.79           C
ATOM    309  H   LEU A  20     186.164 111.126 113.426  1.00  0.00           H
ATOM    310  HA  LEU A  20     187.743 113.496 113.917  1.00  0.00           H
ATOM    311  HB2 LEU A  20     186.691 111.379 115.807  1.00  0.00           H
ATOM    312  HB3 LEU A  20     185.823 112.831 115.302  1.00  0.00           H
ATOM    313  HG  LEU A  20     188.259 112.627 117.089  1.00  0.00           H
ATOM    314 HD21 LEU A  20     186.025 112.182 118.066  1.00  0.00           H
ATOM    315 HD22 LEU A  20     186.787 113.638 118.747  1.00  0.00           H
ATOM    316 HD23 LEU A  20     185.490 113.795 117.538  1.00  0.00           H
ATOM    317 HD11 LEU A  20     188.572 114.627 115.651  1.00  0.00           H
ATOM    318 HD12 LEU A  20     188.260 115.054 117.351  1.00  0.00           H
ATOM    319 HD13 LEU A  20     186.963 115.211 116.142  1.00  0.00           H
ATOM    320  N   HIS A  21     189.296 110.711 113.717  1.00  0.77           N
ATOM    321  CA  HIS A  21     190.613 110.101 113.676  1.00  0.77           C
ATOM    322  C   HIS A  21     191.452 110.605 112.507  1.00  0.77           C
ATOM    323  O   HIS A  21     192.606 110.227 112.350  1.00  0.77           O
ATOM    324  CB  HIS A  21     190.499 108.566 113.628  1.00  0.77           C
ATOM    325  CG  HIS A  21     189.779 108.058 114.835  1.00  0.77           C
ATOM    326  ND1 HIS A  21     190.406 108.127 116.062  1.00  0.77           N
ATOM    327  CD2 HIS A  21     188.528 107.547 114.973  1.00  0.77           C
ATOM    328  CE1 HIS A  21     189.535 107.649 116.924  1.00  0.77           C
ATOM    329  NE2 HIS A  21     188.377 107.285 116.319  1.00  0.77           N
ATOM    330  H   HIS A  21     188.533 110.242 113.251  1.00  0.00           H
ATOM    331  HA  HIS A  21     191.132 110.367 114.597  1.00  0.00           H
ATOM    332  HB2 HIS A  21     189.949 108.275 112.733  1.00  0.00           H
ATOM    333  HB3 HIS A  21     191.498 108.131 113.595  1.00  0.00           H
ATOM    334  HD2 HIS A  21     187.802 107.380 114.191  1.00  0.00           H
ATOM    335  HE1 HIS A  21     189.719 107.558 117.984  1.00  0.00           H
ATOM    336  HE2 HIS A  21     187.560 106.896 116.768  1.00  0.00           H
ATOM    337  N   GLU A  22     190.948 111.584 111.717  1.00  0.77           N
ATOM    338  CA  GLU A  22     191.763 112.364 110.790  1.00  0.77           C
ATOM    339  C   GLU A  22     192.670 113.338 111.551  1.00  0.77           C
ATOM    340  O   GLU A  22     193.638 113.883 111.029  1.00  0.77           O
ATOM    341  CB  GLU A  22     190.861 113.168 109.811  1.00  0.77           C
ATOM    342  CG  GLU A  22     190.017 112.283 108.852  1.00  0.77           C
ATOM    343  CD  GLU A  22     188.889 113.031 108.128  1.00  0.77           C
ATOM    344  OE1 GLU A  22     188.806 114.283 108.213  1.00  0.77           O
ATOM    345  OE2 GLU A  22     188.056 112.329 107.493  1.00  0.77           O
ATOM    346  H   GLU A  22     189.960 111.784 111.772  1.00  0.00           H
ATOM    347  HA  GLU A  22     192.387 111.682 110.212  1.00  0.00           H
ATOM    348  HB2 GLU A  22     190.179 113.781 110.400  1.00  0.00           H
ATOM    349  HB3 GLU A  22     191.493 113.825 109.214  1.00  0.00           H
ATOM    350  HG2 GLU A  22     189.572 111.477 109.435  1.00  0.00           H
ATOM    351  HG3 GLU A  22     190.681 111.847 108.105  1.00  0.00           H
ATOM    352  N   LEU A  23     192.391 113.537 112.855  1.00  0.82           N
ATOM    353  CA  LEU A  23     193.083 114.452 113.735  1.00  0.82           C
ATOM    354  C   LEU A  23     194.240 113.772 114.481  1.00  0.82           C
ATOM    355  O   LEU A  23     194.934 114.379 115.297  1.00  0.82           O
ATOM    356  CB  LEU A  23     192.010 114.977 114.726  1.00  0.82           C
ATOM    357  CG  LEU A  23     192.358 116.205 115.587  1.00  0.82           C
ATOM    358  CD1 LEU A  23     192.706 117.426 114.732  1.00  0.82           C
ATOM    359  CD2 LEU A  23     191.167 116.551 116.492  1.00  0.82           C
ATOM    360  H   LEU A  23     191.633 113.000 113.252  1.00  0.00           H
ATOM    361  HA  LEU A  23     193.472 115.286 113.152  1.00  0.00           H
ATOM    362  HB2 LEU A  23     191.126 115.232 114.141  1.00  0.00           H
ATOM    363  HB3 LEU A  23     191.745 114.160 115.397  1.00  0.00           H
ATOM    364  HG  LEU A  23     193.215 115.961 116.214  1.00  0.00           H
ATOM    365 HD11 LEU A  23     193.551 117.189 114.086  1.00  0.00           H
ATOM    366 HD12 LEU A  23     191.846 117.698 114.120  1.00  0.00           H
ATOM    367 HD13 LEU A  23     192.968 118.261 115.381  1.00  0.00           H
ATOM    368 HD21 LEU A  23     190.912 115.686 117.105  1.00  0.00           H
ATOM    369 HD22 LEU A  23     191.433 117.388 117.138  1.00  0.00           H
ATOM    370 HD23 LEU A  23     190.310 116.825 115.876  1.00  0.00           H
ATOM    371  N   GLU A  24     194.515 112.479 114.188  1.00  0.78           N
ATOM    372  CA  GLU A  24     195.436 111.636 114.941  1.00  0.78           C
ATOM    373  C   GLU A  24     196.876 112.129 115.039  1.00  0.78           C
ATOM    374  O   GLU A  24     197.471 112.125 116.119  1.00  0.78           O
ATOM    375  CB  GLU A  24     195.480 110.215 114.328  1.00  0.78           C
ATOM    376  CG  GLU A  24     196.319 109.201 115.150  1.00  0.78           C
ATOM    377  CD  GLU A  24     196.476 107.841 114.471  1.00  0.78           C
ATOM    378  OE1 GLU A  24     196.093 107.699 113.285  1.00  0.78           O
ATOM    379  OE2 GLU A  24     197.029 106.947 115.163  1.00  0.78           O
ATOM    380  H   GLU A  24     194.049 112.069 113.391  1.00  0.00           H
ATOM    381  HA  GLU A  24     195.048 111.546 115.956  1.00  0.00           H
ATOM    382  HB2 GLU A  24     194.459 109.839 114.259  1.00  0.00           H
ATOM    383  HB3 GLU A  24     195.897 110.280 113.323  1.00  0.00           H
ATOM    384  HG2 GLU A  24     197.311 109.623 115.308  1.00  0.00           H
ATOM    385  HG3 GLU A  24     195.842 109.056 116.119  1.00  0.00           H
ATOM    386  N   ASN A  25     197.467 112.588 113.918  1.00  0.82           N
ATOM    387  CA  ASN A  25     198.872 112.961 113.854  1.00  0.82           C
ATOM    388  C   ASN A  25     199.065 114.464 113.837  1.00  0.82           C
ATOM    389  O   ASN A  25     200.160 114.957 113.585  1.00  0.82           O
ATOM    390  CB  ASN A  25     199.553 112.346 112.604  1.00  0.82           C
ATOM    391  CG  ASN A  25     199.614 110.838 112.811  1.00  0.82           C
ATOM    392  OD1 ASN A  25     200.012 110.380 113.886  1.00  0.82           O
ATOM    393  ND2 ASN A  25     199.209 110.057 111.788  1.00  0.82           N
ATOM    394  H   ASN A  25     196.908 112.677 113.082  1.00  0.00           H
ATOM    395  HA  ASN A  25     199.369 112.565 114.740  1.00  0.00           H
ATOM    396  HB2 ASN A  25     200.560 112.747 112.494  1.00  0.00           H
ATOM    397  HB3 ASN A  25     198.966 112.573 111.714  1.00  0.00           H
ATOM    398 HD21 ASN A  25     198.887 110.478 110.928  1.00  0.00           H
ATOM    399 HD22 ASN A  25     199.228 109.052 111.882  1.00  0.00           H
ATOM    400  N   CYS A  26     198.016 115.252 114.123  1.00  0.85           N
ATOM    401  CA  CYS A  26     198.098 116.700 114.047  1.00  0.85           C
ATOM    402  C   CYS A  26     198.801 117.327 115.240  1.00  0.85           C
ATOM    403  O   CYS A  26     198.346 117.222 116.376  1.00  0.85           O
ATOM    404  CB  CYS A  26     196.689 117.320 113.925  1.00  0.85           C
ATOM    405  SG  CYS A  26     195.797 116.635 112.500  1.00  0.85           S
ATOM    406  H   CYS A  26     197.144 114.825 114.399  1.00  0.00           H
ATOM    407  HA  CYS A  26     198.660 116.960 113.150  1.00  0.00           H
ATOM    408  HB2 CYS A  26     196.784 118.399 113.801  1.00  0.00           H
ATOM    409  HB3 CYS A  26     196.126 117.112 114.835  1.00  0.00           H
ATOM    410  HG  CYS A  26     195.239 115.470 112.841  1.00  0.00           H
ATOM    411  N   SER A  27     199.943 118.003 114.996  1.00  0.84           N
ATOM    412  CA  SER A  27     200.658 118.755 116.025  1.00  0.84           C
ATOM    413  C   SER A  27     200.170 120.193 116.069  1.00  0.84           C
ATOM    414  O   SER A  27     199.865 120.766 117.118  1.00  0.84           O
ATOM    415  CB  SER A  27     202.190 118.698 115.778  1.00  0.84           C
ATOM    416  OG  SER A  27     202.936 119.382 116.786  1.00  0.84           O
ATOM    417  H   SER A  27     200.321 117.989 114.059  1.00  0.00           H
ATOM    418  HA  SER A  27     200.450 118.294 116.991  1.00  0.00           H
ATOM    419  HB2 SER A  27     202.405 119.157 114.813  1.00  0.00           H
ATOM    420  HB3 SER A  27     202.505 117.655 115.751  1.00  0.00           H
ATOM    421  HG  SER A  27     202.675 120.306 116.805  1.00  0.00           H
ATOM    422  N   VAL A  28     200.022 120.798 114.879  1.00  0.84           N
ATOM    423  CA  VAL A  28     199.488 122.131 114.700  1.00  0.84           C
ATOM    424  C   VAL A  28     198.356 121.985 113.706  1.00  0.84           C
ATOM    425  O   VAL A  28     198.456 121.197 112.769  1.00  0.84           O
ATOM    426  CB  VAL A  28     200.539 123.110 114.169  1.00  0.84           C
ATOM    427  CG1 VAL A  28     199.944 124.517 113.948  1.00  0.84           C
ATOM    428  CG2 VAL A  28     201.705 123.195 115.174  1.00  0.84           C
ATOM    429  H   VAL A  28     200.302 120.288 114.053  1.00  0.00           H
ATOM    430  HA  VAL A  28     199.095 122.497 115.649  1.00  0.00           H
ATOM    431  HB  VAL A  28     200.920 122.736 113.219  1.00  0.00           H
ATOM    432 HG21 VAL A  28     202.457 123.891 114.801  1.00  0.00           H
ATOM    433 HG22 VAL A  28     201.331 123.546 116.136  1.00  0.00           H
ATOM    434 HG23 VAL A  28     202.152 122.208 115.296  1.00  0.00           H
ATOM    435 HG11 VAL A  28     199.120 124.456 113.237  1.00  0.00           H
ATOM    436 HG12 VAL A  28     199.577 124.909 114.897  1.00  0.00           H
ATOM    437 HG13 VAL A  28     200.715 125.180 113.554  1.00  0.00           H
ATOM    438  N   ILE A  29     197.243 122.721 113.890  1.00  0.84           N
ATOM    439  CA  ILE A  29     196.212 122.840 112.867  1.00  0.84           C
ATOM    440  C   ILE A  29     196.397 124.173 112.174  1.00  0.84           C
ATOM    441  O   ILE A  29     196.268 125.234 112.791  1.00  0.84           O
ATOM    442  CB  ILE A  29     194.794 122.738 113.428  1.00  0.84           C
ATOM    443  CG1 ILE A  29     194.552 121.308 113.950  1.00  0.84           C
ATOM    444  CG2 ILE A  29     193.734 123.098 112.358  1.00  0.84           C
ATOM    445  CD1 ILE A  29     193.288 121.205 114.805  1.00  0.84           C
ATOM    446  H   ILE A  29     197.119 123.207 114.767  1.00  0.00           H
ATOM    447  HA  ILE A  29     196.355 122.045 112.135  1.00  0.00           H
ATOM    448  HB  ILE A  29     194.698 123.434 114.261  1.00  0.00           H
ATOM    449 HG12 ILE A  29     195.408 121.006 114.553  1.00  0.00           H
ATOM    450 HG13 ILE A  29     194.461 120.631 113.100  1.00  0.00           H
ATOM    451 HG21 ILE A  29     193.913 124.110 111.995  1.00  0.00           H
ATOM    452 HG22 ILE A  29     192.739 123.041 112.799  1.00  0.00           H
ATOM    453 HG23 ILE A  29     193.804 122.396 111.527  1.00  0.00           H
ATOM    454 HD11 ILE A  29     193.163 120.178 115.148  1.00  0.00           H
ATOM    455 HD12 ILE A  29     193.377 121.867 115.666  1.00  0.00           H
ATOM    456 HD13 ILE A  29     192.422 121.497 114.211  1.00  0.00           H
ATOM    457  N   GLU A  30     196.715 124.142 110.862  1.00  0.79           N
ATOM    458  CA  GLU A  30     196.801 125.329 110.033  1.00  0.79           C
ATOM    459  C   GLU A  30     195.423 125.602 109.420  1.00  0.79           C
ATOM    460  O   GLU A  30     195.035 125.096 108.367  1.00  0.79           O
ATOM    461  CB  GLU A  30     197.950 125.188 108.996  1.00  0.79           C
ATOM    462  CG  GLU A  30     198.376 126.496 108.273  1.00  0.79           C
ATOM    463  CD  GLU A  30     199.667 126.319 107.481  1.00  0.79           C
ATOM    464  OE1 GLU A  30     199.723 125.437 106.596  1.00  0.79           O
ATOM    465  OE2 GLU A  30     200.669 127.045 107.726  1.00  0.79           O
ATOM    466  H   GLU A  30     196.903 123.246 110.436  1.00  0.00           H
ATOM    467  HA  GLU A  30     197.045 126.169 110.684  1.00  0.00           H
ATOM    468  HB2 GLU A  30     197.628 124.476 108.236  1.00  0.00           H
ATOM    469  HB3 GLU A  30     198.822 124.777 109.504  1.00  0.00           H
ATOM    470  HG2 GLU A  30     197.582 126.794 107.588  1.00  0.00           H
ATOM    471  HG3 GLU A  30     198.519 127.282 109.015  1.00  0.00           H
ATOM    472  N   GLY A  31     194.612 126.407 110.135  1.00  0.85           N
ATOM    473  CA  GLY A  31     193.207 126.657 109.859  1.00  0.85           C
ATOM    474  C   GLY A  31     192.393 126.540 111.121  1.00  0.85           C
ATOM    475  O   GLY A  31     192.890 126.699 112.236  1.00  0.85           O
ATOM    476  H   GLY A  31     195.016 126.878 110.932  1.00  0.00           H
ATOM    477  HA2 GLY A  31     192.849 125.928 109.132  1.00  0.00           H
ATOM    478  HA3 GLY A  31     193.093 127.660 109.449  1.00  0.00           H
ATOM    479  N   HIS A  32     191.083 126.287 110.973  1.00  0.81           N
ATOM    480  CA  HIS A  32     190.115 126.221 112.050  1.00  0.81           C
ATOM    481  C   HIS A  32     189.711 124.796 112.408  1.00  0.81           C
ATOM    482  O   HIS A  32     189.899 123.853 111.644  1.00  0.81           O
ATOM    483  CB  HIS A  32     188.846 127.007 111.638  1.00  0.81           C
ATOM    484  CG  HIS A  32     188.155 126.465 110.416  1.00  0.81           C
ATOM    485  ND1 HIS A  32     188.750 126.545 109.171  1.00  0.81           N
ATOM    486  CD2 HIS A  32     186.956 125.841 110.316  1.00  0.81           C
ATOM    487  CE1 HIS A  32     187.900 125.975 108.343  1.00  0.81           C
ATOM    488  NE2 HIS A  32     186.794 125.528 108.986  1.00  0.81           N
ATOM    489  H   HIS A  32     190.744 126.130 110.035  1.00  0.00           H
ATOM    490  HA  HIS A  32     190.545 126.693 112.933  1.00  0.00           H
ATOM    491  HB2 HIS A  32     188.142 126.979 112.469  1.00  0.00           H
ATOM    492  HB3 HIS A  32     189.124 128.044 111.451  1.00  0.00           H
ATOM    493  HD2 HIS A  32     186.266 125.631 111.120  1.00  0.00           H
ATOM    494  HE1 HIS A  32     188.064 125.876 107.280  1.00  0.00           H
ATOM    495  HE2 HIS A  32     186.004 125.056 108.570  1.00  0.00           H
ATOM    496  N   LEU A  33     189.119 124.600 113.604  1.00  0.86           N
ATOM    497  CA  LEU A  33     188.606 123.304 114.016  1.00  0.86           C
ATOM    498  C   LEU A  33     187.155 123.424 114.459  1.00  0.86           C
ATOM    499  O   LEU A  33     186.820 124.178 115.374  1.00  0.86           O
ATOM    500  CB  LEU A  33     189.478 122.717 115.156  1.00  0.86           C
ATOM    501  CG  LEU A  33     189.063 121.325 115.687  1.00  0.86           C
ATOM    502  CD1 LEU A  33     189.014 120.254 114.587  1.00  0.86           C
ATOM    503  CD2 LEU A  33     190.032 120.863 116.785  1.00  0.86           C
ATOM    504  H   LEU A  33     189.029 125.382 114.236  1.00  0.00           H
ATOM    505  HA  LEU A  33     188.652 122.627 113.163  1.00  0.00           H
ATOM    506  HB2 LEU A  33     190.500 122.640 114.786  1.00  0.00           H
ATOM    507  HB3 LEU A  33     189.468 123.418 115.990  1.00  0.00           H
ATOM    508  HG  LEU A  33     188.068 121.410 116.124  1.00  0.00           H
ATOM    509 HD11 LEU A  33     188.329 120.571 113.801  1.00  0.00           H
ATOM    510 HD12 LEU A  33     190.011 120.119 114.167  1.00  0.00           H
ATOM    511 HD13 LEU A  33     188.668 119.312 115.012  1.00  0.00           H
ATOM    512 HD21 LEU A  33     190.075 121.616 117.572  1.00  0.00           H
ATOM    513 HD22 LEU A  33     189.683 119.919 117.204  1.00  0.00           H
ATOM    514 HD23 LEU A  33     191.026 120.726 116.358  1.00  0.00           H
ATOM    515  N   GLN A  34     186.242 122.675 113.802  1.00  0.82           N
ATOM    516  CA  GLN A  34     184.845 122.607 114.199  1.00  0.82           C
ATOM    517  C   GLN A  34     184.447 121.172 114.469  1.00  0.82           C
ATOM    518  O   GLN A  34     184.567 120.298 113.609  1.00  0.82           O
ATOM    519  CB  GLN A  34     183.880 123.172 113.124  1.00  0.82           C
ATOM    520  CG  GLN A  34     184.105 124.668 112.830  1.00  0.82           C
ATOM    521  CD  GLN A  34     183.110 125.217 111.809  1.00  0.82           C
ATOM    522  OE1 GLN A  34     181.996 124.736 111.617  1.00  0.82           O
ATOM    523  NE2 GLN A  34     183.516 126.310 111.120  1.00  0.82           N
ATOM    524  H   GLN A  34     186.543 122.139 113.000  1.00  0.00           H
ATOM    525  HA  GLN A  34     184.717 123.181 115.117  1.00  0.00           H
ATOM    526  HB2 GLN A  34     184.025 122.612 112.200  1.00  0.00           H
ATOM    527  HB3 GLN A  34     182.854 123.031 113.463  1.00  0.00           H
ATOM    528  HG2 GLN A  34     185.115 124.800 112.441  1.00  0.00           H
ATOM    529  HG3 GLN A  34     184.007 125.230 113.759  1.00  0.00           H
ATOM    530 HE21 GLN A  34     184.430 126.704 111.291  1.00  0.00           H
ATOM    531 HE22 GLN A  34     182.905 126.731 110.435  1.00  0.00           H
ATOM    532  N   ILE A  35     183.943 120.910 115.688  1.00  0.83           N
ATOM    533  CA  ILE A  35     183.382 119.625 116.069  1.00  0.83           C
ATOM    534  C   ILE A  35     181.956 119.924 116.494  1.00  0.83           C
ATOM    535  O   ILE A  35     181.716 120.618 117.484  1.00  0.83           O
ATOM    536  CB  ILE A  35     184.170 118.956 117.200  1.00  0.83           C
ATOM    537  CG1 ILE A  35     185.634 118.690 116.764  1.00  0.83           C
ATOM    538  CG2 ILE A  35     183.485 117.637 117.626  1.00  0.83           C
ATOM    539  CD1 ILE A  35     186.549 118.229 117.906  1.00  0.83           C
ATOM    540  H   ILE A  35     183.955 121.648 116.377  1.00  0.00           H
ATOM    541  HA  ILE A  35     183.368 118.966 115.201  1.00  0.00           H
ATOM    542  HB  ILE A  35     184.183 119.630 118.057  1.00  0.00           H
ATOM    543 HG12 ILE A  35     186.041 119.612 116.349  1.00  0.00           H
ATOM    544 HG13 ILE A  35     185.634 117.927 115.986  1.00  0.00           H
ATOM    545 HD11 ILE A  35     187.556 118.064 117.522  1.00  0.00           H
ATOM    546 HD12 ILE A  35     186.164 117.300 118.327  1.00  0.00           H
ATOM    547 HD13 ILE A  35     186.577 118.995 118.681  1.00  0.00           H
ATOM    548 HG21 ILE A  35     184.056 117.173 118.430  1.00  0.00           H
ATOM    549 HG22 ILE A  35     182.474 117.849 117.974  1.00  0.00           H
ATOM    550 HG23 ILE A  35     183.441 116.959 116.774  1.00  0.00           H
ATOM    551  N   LEU A  36     180.956 119.449 115.724  1.00  0.78           N
ATOM    552  CA  LEU A  36     179.604 119.942 115.903  1.00  0.78           C
ATOM    553  C   LEU A  36     178.534 118.999 115.390  1.00  0.78           C
ATOM    554  O   LEU A  36     178.786 118.100 114.592  1.00  0.78           O
ATOM    555  CB  LEU A  36     179.401 121.364 115.286  1.00  0.78           C
ATOM    556  CG  LEU A  36     179.286 121.500 113.747  1.00  0.78           C
ATOM    557  CD1 LEU A  36     179.028 122.967 113.369  1.00  0.78           C
ATOM    558  CD2 LEU A  36     180.530 121.019 112.991  1.00  0.78           C
ATOM    559  H   LEU A  36     181.149 118.749 115.022  1.00  0.00           H
ATOM    560  HA  LEU A  36     179.446 120.041 116.977  1.00  0.00           H
ATOM    561  HB2 LEU A  36     178.484 121.770 115.713  1.00  0.00           H
ATOM    562  HB3 LEU A  36     180.229 121.992 115.615  1.00  0.00           H
ATOM    563  HG  LEU A  36     178.434 120.907 113.415  1.00  0.00           H
ATOM    564 HD11 LEU A  36     178.146 123.329 113.897  1.00  0.00           H
ATOM    565 HD12 LEU A  36     178.864 123.041 112.294  1.00  0.00           H
ATOM    566 HD13 LEU A  36     179.891 123.571 113.647  1.00  0.00           H
ATOM    567 HD21 LEU A  36     180.731 119.978 113.246  1.00  0.00           H
ATOM    568 HD22 LEU A  36     180.358 121.104 111.918  1.00  0.00           H
ATOM    569 HD23 LEU A  36     181.386 121.633 113.271  1.00  0.00           H
ATOM    570  N   LEU A  37     177.284 119.191 115.865  1.00  0.72           N
ATOM    571  CA  LEU A  37     176.101 118.468 115.413  1.00  0.72           C
ATOM    572  C   LEU A  37     176.170 116.952 115.572  1.00  0.72           C
ATOM    573  O   LEU A  37     175.994 116.188 114.619  1.00  0.72           O
ATOM    574  CB  LEU A  37     175.680 118.863 113.970  1.00  0.72           C
ATOM    575  CG  LEU A  37     175.234 120.330 113.809  1.00  0.72           C
ATOM    576  CD1 LEU A  37     175.091 120.671 112.320  1.00  0.72           C
ATOM    577  CD2 LEU A  37     173.907 120.616 114.529  1.00  0.72           C
ATOM    578  H   LEU A  37     177.160 119.887 116.587  1.00  0.00           H
ATOM    579  HA  LEU A  37     175.288 118.797 116.060  1.00  0.00           H
ATOM    580  HB2 LEU A  37     176.530 118.692 113.309  1.00  0.00           H
ATOM    581  HB3 LEU A  37     174.861 118.215 113.657  1.00  0.00           H
ATOM    582  HG  LEU A  37     176.003 120.973 114.237  1.00  0.00           H
ATOM    583 HD11 LEU A  37     176.032 120.468 111.808  1.00  0.00           H
ATOM    584 HD12 LEU A  37     174.301 120.061 111.882  1.00  0.00           H
ATOM    585 HD13 LEU A  37     174.838 121.726 112.211  1.00  0.00           H
ATOM    586 HD21 LEU A  37     174.008 120.374 115.587  1.00  0.00           H
ATOM    587 HD22 LEU A  37     173.117 120.006 114.091  1.00  0.00           H
ATOM    588 HD23 LEU A  37     173.654 121.671 114.420  1.00  0.00           H
ATOM    589  N   MET A  38     176.418 116.484 116.808  1.00  0.72           N
ATOM    590  CA  MET A  38     176.461 115.074 117.137  1.00  0.72           C
ATOM    591  C   MET A  38     175.369 114.778 118.150  1.00  0.72           C
ATOM    592  O   MET A  38     175.448 115.149 119.320  1.00  0.72           O
ATOM    593  CB  MET A  38     177.834 114.679 117.721  1.00  0.72           C
ATOM    594  CG  MET A  38     178.996 114.913 116.740  1.00  0.72           C
ATOM    595  SD  MET A  38     180.611 114.533 117.464  1.00  0.72           S
ATOM    596  CE  MET A  38     181.542 114.976 115.976  1.00  0.72           C
ATOM    597  H   MET A  38     176.583 117.152 117.547  1.00  0.00           H
ATOM    598  HA  MET A  38     176.277 114.492 116.234  1.00  0.00           H
ATOM    599  HB2 MET A  38     177.808 113.621 117.983  1.00  0.00           H
ATOM    600  HB3 MET A  38     178.013 115.261 118.625  1.00  0.00           H
ATOM    601  HG2 MET A  38     178.848 114.278 115.867  1.00  0.00           H
ATOM    602  HG3 MET A  38     178.987 115.956 116.424  1.00  0.00           H
ATOM    603  HE1 MET A  38     182.607 114.829 116.156  1.00  0.00           H
ATOM    604  HE2 MET A  38     181.223 114.344 115.147  1.00  0.00           H
ATOM    605  HE3 MET A  38     181.356 116.021 115.729  1.00  0.00           H
ATOM    606  N   PHE A  39     174.293 114.107 117.689  1.00  0.74           N
ATOM    607  CA  PHE A  39     173.080 113.936 118.474  1.00  0.74           C
ATOM    608  C   PHE A  39     172.904 112.515 118.976  1.00  0.74           C
ATOM    609  O   PHE A  39     172.167 112.268 119.929  1.00  0.74           O
ATOM    610  CB  PHE A  39     171.832 114.238 117.604  1.00  0.74           C
ATOM    611  CG  PHE A  39     171.727 115.701 117.284  1.00  0.74           C
ATOM    612  CD1 PHE A  39     170.976 116.549 118.113  1.00  0.74           C
ATOM    613  CD2 PHE A  39     172.318 116.232 116.126  1.00  0.74           C
ATOM    614  CE1 PHE A  39     170.813 117.903 117.795  1.00  0.74           C
ATOM    615  CE2 PHE A  39     172.164 117.586 115.807  1.00  0.74           C
ATOM    616  CZ  PHE A  39     171.409 118.421 116.640  1.00  0.74           C
ATOM    617  H   PHE A  39     174.331 113.708 116.762  1.00  0.00           H
ATOM    618  HA  PHE A  39     173.101 114.619 119.324  1.00  0.00           H
ATOM    619  HB2 PHE A  39     171.905 113.676 116.673  1.00  0.00           H
ATOM    620  HB3 PHE A  39     170.937 113.925 118.142  1.00  0.00           H
ATOM    621  HD1 PHE A  39     170.518 116.152 119.007  1.00  0.00           H
ATOM    622  HD2 PHE A  39     172.896 115.591 115.477  1.00  0.00           H
ATOM    623  HE1 PHE A  39     170.230 118.545 118.439  1.00  0.00           H
ATOM    624  HE2 PHE A  39     172.628 117.987 114.918  1.00  0.00           H
ATOM    625  HZ  PHE A  39     171.287 119.465 116.391  1.00  0.00           H
ATOM    626  N   LYS A  40     173.577 111.532 118.350  1.00  0.71           N
ATOM    627  CA  LYS A  40     173.494 110.135 118.737  1.00  0.71           C
ATOM    628  C   LYS A  40     174.853 109.675 119.214  1.00  0.71           C
ATOM    629  O   LYS A  40     175.430 108.725 118.697  1.00  0.71           O
ATOM    630  CB  LYS A  40     172.990 109.227 117.583  1.00  0.71           C
ATOM    631  CG  LYS A  40     171.555 109.491 117.079  1.00  0.71           C
ATOM    632  CD  LYS A  40     170.412 109.073 118.032  1.00  0.71           C
ATOM    633  CE  LYS A  40     169.994 110.159 119.033  1.00  0.71           C
ATOM    634  NZ  LYS A  40     168.729 109.802 119.714  1.00  0.71           N
ATOM    635  H   LYS A  40     174.170 111.779 117.571  1.00  0.00           H
ATOM    636  HA  LYS A  40     172.794 110.052 119.568  1.00  0.00           H
ATOM    637  HB2 LYS A  40     173.035 108.195 117.930  1.00  0.00           H
ATOM    638  HB3 LYS A  40     173.673 109.335 116.740  1.00  0.00           H
ATOM    639  HG2 LYS A  40     171.459 110.561 116.893  1.00  0.00           H
ATOM    640  HG3 LYS A  40     171.422 108.966 116.133  1.00  0.00           H
ATOM    641  HD2 LYS A  40     170.739 108.199 118.594  1.00  0.00           H
ATOM    642  HD3 LYS A  40     169.543 108.797 117.434  1.00  0.00           H
ATOM    643  HE2 LYS A  40     170.779 110.275 119.780  1.00  0.00           H
ATOM    644  HE3 LYS A  40     169.862 111.102 118.503  1.00  0.00           H
ATOM    645  HZ1 LYS A  40     168.479 110.533 120.365  1.00  0.00           H
ATOM    646  HZ2 LYS A  40     168.850 108.933 120.214  1.00  0.00           H
ATOM    647  HZ3 LYS A  40     167.995 109.697 119.028  1.00  0.00           H
ATOM    648  N   THR A  41     175.375 110.360 120.238  1.00  0.77           N
ATOM    649  CA  THR A  41     176.645 110.059 120.871  1.00  0.77           C
ATOM    650  C   THR A  41     176.408 109.947 122.356  1.00  0.77           C
ATOM    651  O   THR A  41     175.387 110.380 122.896  1.00  0.77           O
ATOM    652  CB  THR A  41     177.720 111.116 120.631  1.00  0.77           C
ATOM    653  OG1 THR A  41     177.185 112.435 120.704  1.00  0.77           O
ATOM    654  CG2 THR A  41     178.274 110.956 119.209  1.00  0.77           C
ATOM    655  H   THR A  41     174.847 111.143 120.596  1.00  0.00           H
ATOM    656  HA  THR A  41     177.005 109.100 120.499  1.00  0.00           H
ATOM    657  HB  THR A  41     178.524 111.000 121.358  1.00  0.00           H
ATOM    658  HG1 THR A  41     177.716 112.963 121.304  1.00  0.00           H
ATOM    659 HG21 THR A  41     179.043 111.708 119.031  1.00  0.00           H
ATOM    660 HG22 THR A  41     177.467 111.084 118.488  1.00  0.00           H
ATOM    661 HG23 THR A  41     178.706 109.962 119.097  1.00  0.00           H
ATOM    662  N   ARG A  42     177.333 109.282 123.056  1.00  0.74           N
ATOM    663  CA  ARG A  42     177.145 108.851 124.417  1.00  0.74           C
ATOM    664  C   ARG A  42     178.331 109.239 125.300  1.00  0.74           C
ATOM    665  O   ARG A  42     179.432 109.457 124.798  1.00  0.74           O
ATOM    666  CB  ARG A  42     177.062 107.310 124.425  1.00  0.74           C
ATOM    667  CG  ARG A  42     175.888 106.668 123.652  1.00  0.74           C
ATOM    668  CD  ARG A  42     174.512 106.920 124.261  1.00  0.74           C
ATOM    669  NE  ARG A  42     174.583 106.323 125.629  1.00  0.74           N
ATOM    670  CZ  ARG A  42     173.817 106.605 126.681  1.00  0.74           C
ATOM    671  NH1 ARG A  42     172.872 107.533 126.631  1.00  0.74           N
ATOM    672  NH2 ARG A  42     174.071 105.953 127.811  1.00  0.74           N
ATOM    673  H   ARG A  42     178.212 109.070 122.605  1.00  0.00           H
ATOM    674  HA  ARG A  42     176.226 109.276 124.819  1.00  0.00           H
ATOM    675  HB2 ARG A  42     176.986 106.990 125.464  1.00  0.00           H
ATOM    676  HB3 ARG A  42     177.993 106.917 124.016  1.00  0.00           H
ATOM    677  HG2 ARG A  42     175.889 107.069 122.638  1.00  0.00           H
ATOM    678  HG3 ARG A  42     176.053 105.592 123.600  1.00  0.00           H
ATOM    679  HD2 ARG A  42     173.736 106.433 123.670  1.00  0.00           H
ATOM    680  HD3 ARG A  42     174.320 107.991 124.327  1.00  0.00           H
ATOM    681  HE  ARG A  42     175.296 105.623 125.773  1.00  0.00           H
ATOM    682 HH11 ARG A  42     172.703 108.036 125.771  1.00  0.00           H
ATOM    683 HH12 ARG A  42     172.321 107.738 127.453  1.00  0.00           H
ATOM    684 HH21 ARG A  42     174.807 105.262 127.841  1.00  0.00           H
ATOM    685 HH22 ARG A  42     173.528 106.149 128.640  1.00  0.00           H
ATOM    686  N   PRO A  43     178.207 109.298 126.635  1.00  0.82           N
ATOM    687  CA  PRO A  43     179.352 109.558 127.513  1.00  0.82           C
ATOM    688  C   PRO A  43     180.355 108.424 127.564  1.00  0.82           C
ATOM    689  O   PRO A  43     181.427 108.573 128.148  1.00  0.82           O
ATOM    690  CB  PRO A  43     178.721 109.758 128.901  1.00  0.82           C
ATOM    691  CG  PRO A  43     177.302 110.244 128.605  1.00  0.82           C
ATOM    692  CD  PRO A  43     176.933 109.470 127.340  1.00  0.82           C
ATOM    693  HA  PRO A  43     179.852 110.475 127.202  1.00  0.00           H
ATOM    694  HB2 PRO A  43     178.700 108.819 129.454  1.00  0.00           H
ATOM    695  HB3 PRO A  43     179.271 110.515 129.461  1.00  0.00           H
ATOM    696  HG2 PRO A  43     177.285 111.319 128.426  1.00  0.00           H
ATOM    697  HG3 PRO A  43     176.630 109.982 129.423  1.00  0.00           H
ATOM    698  HD2 PRO A  43     176.498 108.503 127.592  1.00  0.00           H
ATOM    699  HD3 PRO A  43     176.239 110.049 126.731  1.00  0.00           H
ATOM    700  N   GLU A  44     180.022 107.256 126.993  1.00  0.78           N
ATOM    701  CA  GLU A  44     180.925 106.137 126.897  1.00  0.78           C
ATOM    702  C   GLU A  44     181.829 106.188 125.674  1.00  0.78           C
ATOM    703  O   GLU A  44     182.916 105.614 125.701  1.00  0.78           O
ATOM    704  CB  GLU A  44     180.127 104.815 127.032  1.00  0.78           C
ATOM    705  CG  GLU A  44     178.887 104.657 126.109  1.00  0.78           C
ATOM    706  CD  GLU A  44     177.624 104.311 126.905  1.00  0.78           C
ATOM    707  OE1 GLU A  44     177.688 103.351 127.704  1.00  0.78           O
ATOM    708  OE2 GLU A  44     176.592 105.032 126.784  1.00  0.78           O
ATOM    709  H   GLU A  44     179.092 107.156 126.612  1.00  0.00           H
ATOM    710  HA  GLU A  44     181.579 106.193 127.767  1.00  0.00           H
ATOM    711  HB2 GLU A  44     179.784 104.739 128.064  1.00  0.00           H
ATOM    712  HB3 GLU A  44     180.806 103.985 126.837  1.00  0.00           H
ATOM    713  HG2 GLU A  44     178.722 105.594 125.576  1.00  0.00           H
ATOM    714  HG3 GLU A  44     179.080 103.865 125.385  1.00  0.00           H
ATOM    715  N   ASP A  45     181.458 106.965 124.634  1.00  0.79           N
ATOM    716  CA  ASP A  45     182.194 107.139 123.393  1.00  0.79           C
ATOM    717  C   ASP A  45     183.539 107.845 123.570  1.00  0.79           C
ATOM    718  O   ASP A  45     184.525 107.563 122.893  1.00  0.79           O
ATOM    719  CB  ASP A  45     181.351 107.963 122.380  1.00  0.79           C
ATOM    720  CG  ASP A  45     179.993 107.355 122.075  1.00  0.79           C
ATOM    721  OD1 ASP A  45     179.725 106.196 122.465  1.00  0.79           O
ATOM    722  OD2 ASP A  45     179.177 108.095 121.465  1.00  0.79           O
ATOM    723  H   ASP A  45     180.589 107.472 124.727  1.00  0.00           H
ATOM    724  HA  ASP A  45     182.378 106.154 122.964  1.00  0.00           H
ATOM    725  HB2 ASP A  45     181.196 108.960 122.793  1.00  0.00           H
ATOM    726  HB3 ASP A  45     181.911 108.053 121.449  1.00  0.00           H
ATOM    727  N   PHE A  46     183.604 108.819 124.496  1.00  0.80           N
ATOM    728  CA  PHE A  46     184.686 109.787 124.538  1.00  0.80           C
ATOM    729  C   PHE A  46     185.824 109.438 125.479  1.00  0.80           C
ATOM    730  O   PHE A  46     186.853 110.104 125.468  1.00  0.80           O
ATOM    731  CB  PHE A  46     184.145 111.164 125.012  1.00  0.80           C
ATOM    732  CG  PHE A  46     183.251 111.767 123.969  1.00  0.80           C
ATOM    733  CD1 PHE A  46     183.812 112.432 122.866  1.00  0.80           C
ATOM    734  CD2 PHE A  46     181.854 111.687 124.081  1.00  0.80           C
ATOM    735  CE1 PHE A  46     182.989 113.007 121.889  1.00  0.80           C
ATOM    736  CE2 PHE A  46     181.029 112.247 123.098  1.00  0.80           C
ATOM    737  CZ  PHE A  46     181.596 112.907 122.002  1.00  0.80           C
ATOM    738  H   PHE A  46     182.872 108.879 125.189  1.00  0.00           H
ATOM    739  HA  PHE A  46     185.090 109.900 123.532  1.00  0.00           H
ATOM    740  HB2 PHE A  46     183.579 111.029 125.934  1.00  0.00           H
ATOM    741  HB3 PHE A  46     184.983 111.835 125.199  1.00  0.00           H
ATOM    742  HD1 PHE A  46     184.886 112.500 122.771  1.00  0.00           H
ATOM    743  HD2 PHE A  46     181.412 111.190 124.932  1.00  0.00           H
ATOM    744  HE1 PHE A  46     183.428 113.527 121.050  1.00  0.00           H
ATOM    745  HE2 PHE A  46     179.955 112.170 123.186  1.00  0.00           H
ATOM    746  HZ  PHE A  46     180.960 113.339 121.244  1.00  0.00           H
ATOM    747  N   ARG A  47     185.731 108.384 126.314  1.00  0.69           N
ATOM    748  CA  ARG A  47     186.709 108.236 127.390  1.00  0.69           C
ATOM    749  C   ARG A  47     187.946 107.440 127.004  1.00  0.69           C
ATOM    750  O   ARG A  47     188.877 107.312 127.792  1.00  0.69           O
ATOM    751  CB  ARG A  47     186.076 107.604 128.655  1.00  0.69           C
ATOM    752  CG  ARG A  47     185.625 106.135 128.508  1.00  0.69           C
ATOM    753  CD  ARG A  47     185.251 105.480 129.843  1.00  0.69           C
ATOM    754  NE  ARG A  47     184.026 106.178 130.370  1.00  0.69           N
ATOM    755  CZ  ARG A  47     182.767 105.740 130.228  1.00  0.69           C
ATOM    756  NH1 ARG A  47     182.492 104.593 129.615  1.00  0.69           N
ATOM    757  NH2 ARG A  47     181.759 106.478 130.688  1.00  0.69           N
ATOM    758  H   ARG A  47     184.993 107.704 126.197  1.00  0.00           H
ATOM    759  HA  ARG A  47     187.042 109.237 127.662  1.00  0.00           H
ATOM    760  HB2 ARG A  47     185.203 108.198 128.926  1.00  0.00           H
ATOM    761  HB3 ARG A  47     186.799 107.663 129.468  1.00  0.00           H
ATOM    762  HG2 ARG A  47     184.755 106.104 127.852  1.00  0.00           H
ATOM    763  HG3 ARG A  47     186.432 105.563 128.050  1.00  0.00           H
ATOM    764  HD2 ARG A  47     186.072 105.587 130.551  1.00  0.00           H
ATOM    765  HD3 ARG A  47     185.034 104.423 129.687  1.00  0.00           H
ATOM    766  HE  ARG A  47     184.163 107.045 130.870  1.00  0.00           H
ATOM    767 HH11 ARG A  47     183.242 104.023 129.250  1.00  0.00           H
ATOM    768 HH12 ARG A  47     181.533 104.292 129.514  1.00  0.00           H
ATOM    769 HH21 ARG A  47     181.946 107.357 131.149  1.00  0.00           H
ATOM    770 HH22 ARG A  47     180.807 106.159 130.576  1.00  0.00           H
ATOM    771  N   ASP A  48     187.975 106.919 125.767  1.00  0.73           N
ATOM    772  CA  ASP A  48     189.111 106.246 125.173  1.00  0.73           C
ATOM    773  C   ASP A  48     189.766 107.192 124.154  1.00  0.73           C
ATOM    774  O   ASP A  48     190.769 106.899 123.509  1.00  0.73           O
ATOM    775  CB  ASP A  48     188.526 104.971 124.505  1.00  0.73           C
ATOM    776  CG  ASP A  48     189.588 103.939 124.166  1.00  0.73           C
ATOM    777  OD1 ASP A  48     190.349 103.566 125.093  1.00  0.73           O
ATOM    778  OD2 ASP A  48     189.596 103.472 123.000  1.00  0.73           O
ATOM    779  H   ASP A  48     187.139 107.003 125.207  1.00  0.00           H
ATOM    780  HA  ASP A  48     189.829 105.970 125.945  1.00  0.00           H
ATOM    781  HB2 ASP A  48     187.808 104.519 125.189  1.00  0.00           H
ATOM    782  HB3 ASP A  48     188.008 105.258 123.590  1.00  0.00           H
ATOM    783  N   LEU A  49     189.200 108.406 123.983  1.00  0.79           N
ATOM    784  CA  LEU A  49     189.486 109.231 122.833  1.00  0.79           C
ATOM    785  C   LEU A  49     190.171 110.525 123.232  1.00  0.79           C
ATOM    786  O   LEU A  49     189.553 111.463 123.731  1.00  0.79           O
ATOM    787  CB  LEU A  49     188.142 109.514 122.126  1.00  0.79           C
ATOM    788  CG  LEU A  49     188.213 110.234 120.769  1.00  0.79           C
ATOM    789  CD1 LEU A  49     189.062 109.465 119.748  1.00  0.79           C
ATOM    790  CD2 LEU A  49     186.786 110.400 120.232  1.00  0.79           C
ATOM    791  H   LEU A  49     188.556 108.748 124.682  1.00  0.00           H
ATOM    792  HA  LEU A  49     190.136 108.680 122.153  1.00  0.00           H
ATOM    793  HB2 LEU A  49     187.645 108.557 121.966  1.00  0.00           H
ATOM    794  HB3 LEU A  49     187.524 110.111 122.796  1.00  0.00           H
ATOM    795  HG  LEU A  49     188.650 111.221 120.917  1.00  0.00           H
ATOM    796 HD21 LEU A  49     186.817 110.909 119.269  1.00  0.00           H
ATOM    797 HD22 LEU A  49     186.328 109.419 120.109  1.00  0.00           H
ATOM    798 HD23 LEU A  49     186.199 110.990 120.936  1.00  0.00           H
ATOM    799 HD11 LEU A  49     190.075 109.348 120.132  1.00  0.00           H
ATOM    800 HD12 LEU A  49     188.623 108.482 119.578  1.00  0.00           H
ATOM    801 HD13 LEU A  49     189.090 110.018 118.809  1.00  0.00           H
ATOM    802  N   SER A  50     191.489 110.610 122.974  1.00  0.84           N
ATOM    803  CA  SER A  50     192.310 111.710 123.454  1.00  0.84           C
ATOM    804  C   SER A  50     193.300 112.095 122.385  1.00  0.84           C
ATOM    805  O   SER A  50     193.932 111.230 121.780  1.00  0.84           O
ATOM    806  CB  SER A  50     193.157 111.327 124.700  1.00  0.84           C
ATOM    807  OG  SER A  50     192.315 110.878 125.759  1.00  0.84           O
ATOM    808  H   SER A  50     191.925 109.882 122.426  1.00  0.00           H
ATOM    809  HA  SER A  50     191.676 112.564 123.691  1.00  0.00           H
ATOM    810  HB2 SER A  50     193.850 110.530 124.431  1.00  0.00           H
ATOM    811  HB3 SER A  50     193.721 112.198 125.033  1.00  0.00           H
ATOM    812  HG  SER A  50     192.230 111.572 126.417  1.00  0.00           H
ATOM    813  N   PHE A  51     193.499 113.404 122.121  1.00  0.82           N
ATOM    814  CA  PHE A  51     194.417 113.869 121.087  1.00  0.82           C
ATOM    815  C   PHE A  51     195.631 114.591 121.672  1.00  0.82           C
ATOM    816  O   PHE A  51     195.656 115.822 121.700  1.00  0.82           O
ATOM    817  CB  PHE A  51     193.700 114.800 120.073  1.00  0.82           C
ATOM    818  CG  PHE A  51     192.705 113.982 119.302  1.00  0.82           C
ATOM    819  CD1 PHE A  51     193.141 113.147 118.259  1.00  0.82           C
ATOM    820  CD2 PHE A  51     191.347 113.979 119.660  1.00  0.82           C
ATOM    821  CE1 PHE A  51     192.240 112.301 117.602  1.00  0.82           C
ATOM    822  CE2 PHE A  51     190.442 113.136 119.003  1.00  0.82           C
ATOM    823  CZ  PHE A  51     190.894 112.290 117.982  1.00  0.82           C
ATOM    824  H   PHE A  51     192.991 114.090 122.662  1.00  0.00           H
ATOM    825  HA  PHE A  51     194.777 112.996 120.543  1.00  0.00           H
ATOM    826  HB2 PHE A  51     194.431 115.232 119.389  1.00  0.00           H
ATOM    827  HB3 PHE A  51     193.184 115.597 120.608  1.00  0.00           H
ATOM    828  HD1 PHE A  51     194.179 113.158 117.962  1.00  0.00           H
ATOM    829  HD2 PHE A  51     190.998 114.631 120.447  1.00  0.00           H
ATOM    830  HE1 PHE A  51     192.583 111.659 116.804  1.00  0.00           H
ATOM    831  HE2 PHE A  51     189.399 113.138 119.283  1.00  0.00           H
ATOM    832  HZ  PHE A  51     190.201 111.627 117.486  1.00  0.00           H
ATOM    833  N   PRO A  52     196.695 113.927 122.136  1.00  0.87           N
ATOM    834  CA  PRO A  52     197.667 114.584 123.006  1.00  0.87           C
ATOM    835  C   PRO A  52     198.797 115.216 122.216  1.00  0.87           C
ATOM    836  O   PRO A  52     199.730 115.714 122.838  1.00  0.87           O
ATOM    837  CB  PRO A  52     198.210 113.422 123.860  1.00  0.87           C
ATOM    838  CG  PRO A  52     198.109 112.205 122.939  1.00  0.87           C
ATOM    839  CD  PRO A  52     196.781 112.467 122.237  1.00  0.87           C
ATOM    840  HA  PRO A  52     197.177 115.327 123.636  1.00  0.00           H
ATOM    841  HB2 PRO A  52     199.245 113.604 124.148  1.00  0.00           H
ATOM    842  HB3 PRO A  52     197.590 113.280 124.745  1.00  0.00           H
ATOM    843  HG2 PRO A  52     198.935 112.173 122.229  1.00  0.00           H
ATOM    844  HG3 PRO A  52     198.063 111.284 123.520  1.00  0.00           H
ATOM    845  HD2 PRO A  52     195.952 112.073 122.824  1.00  0.00           H
ATOM    846  HD3 PRO A  52     196.785 112.020 121.243  1.00  0.00           H
ATOM    847  N   LYS A  53     198.751 115.233 120.869  1.00  0.80           N
ATOM    848  CA  LYS A  53     199.785 115.886 120.081  1.00  0.80           C
ATOM    849  C   LYS A  53     199.407 117.315 119.719  1.00  0.80           C
ATOM    850  O   LYS A  53     200.270 118.089 119.324  1.00  0.80           O
ATOM    851  CB  LYS A  53     200.089 115.123 118.755  1.00  0.80           C
ATOM    852  CG  LYS A  53     201.045 113.917 118.892  1.00  0.80           C
ATOM    853  CD  LYS A  53     200.419 112.588 119.361  1.00  0.80           C
ATOM    854  CE  LYS A  53     199.444 112.019 118.323  1.00  0.80           C
ATOM    855  NZ  LYS A  53     198.991 110.642 118.634  1.00  0.80           N
ATOM    856  H   LYS A  53     197.981 114.782 120.396  1.00  0.00           H
ATOM    857  HA  LYS A  53     200.699 115.915 120.675  1.00  0.00           H
ATOM    858  HB2 LYS A  53     199.144 114.759 118.351  1.00  0.00           H
ATOM    859  HB3 LYS A  53     200.521 115.827 118.043  1.00  0.00           H
ATOM    860  HG2 LYS A  53     201.498 113.742 117.916  1.00  0.00           H
ATOM    861  HG3 LYS A  53     201.836 114.187 119.592  1.00  0.00           H
ATOM    862  HD2 LYS A  53     201.216 111.864 119.531  1.00  0.00           H
ATOM    863  HD3 LYS A  53     199.885 112.756 120.296  1.00  0.00           H
ATOM    864  HE2 LYS A  53     199.940 112.009 117.352  1.00  0.00           H
ATOM    865  HE3 LYS A  53     198.572 112.671 118.265  1.00  0.00           H
ATOM    866  HZ1 LYS A  53     198.354 110.326 117.916  1.00  0.00           H
ATOM    867  HZ2 LYS A  53     198.520 110.636 119.528  1.00  0.00           H
ATOM    868  HZ3 LYS A  53     199.790 110.025 118.671  1.00  0.00           H
ATOM    869  N   LEU A  54     198.130 117.730 119.866  1.00  0.84           N
ATOM    870  CA  LEU A  54     197.708 119.035 119.382  1.00  0.84           C
ATOM    871  C   LEU A  54     198.105 120.170 120.317  1.00  0.84           C
ATOM    872  O   LEU A  54     197.603 120.282 121.434  1.00  0.84           O
ATOM    873  CB  LEU A  54     196.176 119.069 119.143  1.00  0.84           C
ATOM    874  CG  LEU A  54     195.628 120.390 118.554  1.00  0.84           C
ATOM    875  CD1 LEU A  54     196.231 120.692 117.175  1.00  0.84           C
ATOM    876  CD2 LEU A  54     194.097 120.341 118.453  1.00  0.84           C
ATOM    877  H   LEU A  54     197.459 117.126 120.318  1.00  0.00           H
ATOM    878  HA  LEU A  54     198.197 119.208 118.424  1.00  0.00           H
ATOM    879  HB2 LEU A  54     195.682 118.896 120.099  1.00  0.00           H
ATOM    880  HB3 LEU A  54     195.914 118.255 118.467  1.00  0.00           H
ATOM    881  HG  LEU A  54     195.899 121.202 119.229  1.00  0.00           H
ATOM    882 HD11 LEU A  54     197.318 120.726 117.253  1.00  0.00           H
ATOM    883 HD12 LEU A  54     195.941 119.910 116.473  1.00  0.00           H
ATOM    884 HD13 LEU A  54     195.862 121.654 116.820  1.00  0.00           H
ATOM    885 HD21 LEU A  54     193.674 120.126 119.435  1.00  0.00           H
ATOM    886 HD22 LEU A  54     193.804 119.559 117.753  1.00  0.00           H
ATOM    887 HD23 LEU A  54     193.725 121.303 118.100  1.00  0.00           H
ATOM    888  N   ILE A  55     199.018 121.053 119.860  1.00  0.82           N
ATOM    889  CA  ILE A  55     199.555 122.138 120.669  1.00  0.82           C
ATOM    890  C   ILE A  55     198.952 123.479 120.275  1.00  0.82           C
ATOM    891  O   ILE A  55     198.764 124.367 121.112  1.00  0.82           O
ATOM    892  CB  ILE A  55     201.082 122.190 120.515  1.00  0.82           C
ATOM    893  CG1 ILE A  55     201.708 120.893 121.088  1.00  0.82           C
ATOM    894  CG2 ILE A  55     201.680 123.434 121.217  1.00  0.82           C
ATOM    895  CD1 ILE A  55     203.213 120.759 120.820  1.00  0.82           C
ATOM    896  H   ILE A  55     199.345 120.956 118.909  1.00  0.00           H
ATOM    897  HA  ILE A  55     199.317 121.943 121.715  1.00  0.00           H
ATOM    898  HB  ILE A  55     201.319 122.247 119.453  1.00  0.00           H
ATOM    899 HG12 ILE A  55     201.202 120.039 120.637  1.00  0.00           H
ATOM    900 HG13 ILE A  55     201.541 120.870 122.165  1.00  0.00           H
ATOM    901 HG21 ILE A  55     201.230 124.337 120.803  1.00  0.00           H
ATOM    902 HG22 ILE A  55     201.473 123.382 122.286  1.00  0.00           H
ATOM    903 HG23 ILE A  55     202.758 123.459 121.056  1.00  0.00           H
ATOM    904 HD11 ILE A  55     203.578 119.827 121.251  1.00  0.00           H
ATOM    905 HD12 ILE A  55     203.391 120.756 119.745  1.00  0.00           H
ATOM    906 HD13 ILE A  55     203.739 121.599 121.273  1.00  0.00           H
ATOM    907  N   MET A  56     198.605 123.676 118.986  1.00  0.81           N
ATOM    908  CA  MET A  56     198.236 124.996 118.509  1.00  0.81           C
ATOM    909  C   MET A  56     197.211 124.963 117.387  1.00  0.81           C
ATOM    910  O   MET A  56     197.264 124.134 116.479  1.00  0.81           O
ATOM    911  CB  MET A  56     199.509 125.755 118.044  1.00  0.81           C
ATOM    912  CG  MET A  56     199.290 127.238 117.681  1.00  0.81           C
ATOM    913  SD  MET A  56     200.827 128.187 117.463  1.00  0.81           S
ATOM    914  CE  MET A  56     201.256 127.511 115.833  1.00  0.81           C
ATOM    915  H   MET A  56     198.602 122.895 118.345  1.00  0.00           H
ATOM    916  HA  MET A  56     197.803 125.546 119.344  1.00  0.00           H
ATOM    917  HB2 MET A  56     199.903 125.247 117.164  1.00  0.00           H
ATOM    918  HB3 MET A  56     200.254 125.700 118.838  1.00  0.00           H
ATOM    919  HG2 MET A  56     198.726 127.282 116.749  1.00  0.00           H
ATOM    920  HG3 MET A  56     198.700 127.706 118.469  1.00  0.00           H
ATOM    921  HE1 MET A  56     202.188 127.958 115.487  1.00  0.00           H
ATOM    922  HE2 MET A  56     201.378 126.431 115.909  1.00  0.00           H
ATOM    923  HE3 MET A  56     200.459 127.738 115.124  1.00  0.00           H
ATOM    924  N   ILE A  57     196.250 125.911 117.423  1.00  0.84           N
ATOM    925  CA  ILE A  57     195.263 126.125 116.372  1.00  0.84           C
ATOM    926  C   ILE A  57     195.478 127.538 115.854  1.00  0.84           C
ATOM    927  O   ILE A  57     195.530 128.498 116.624  1.00  0.84           O
ATOM    928  CB  ILE A  57     193.829 125.949 116.883  1.00  0.84           C
ATOM    929  CG1 ILE A  57     193.623 124.491 117.365  1.00  0.84           C
ATOM    930  CG2 ILE A  57     192.813 126.312 115.773  1.00  0.84           C
ATOM    931  CD1 ILE A  57     192.279 124.240 118.062  1.00  0.84           C
ATOM    932  H   ILE A  57     196.213 126.513 118.233  1.00  0.00           H
ATOM    933  HA  ILE A  57     195.443 125.417 115.563  1.00  0.00           H
ATOM    934  HB  ILE A  57     193.676 126.620 117.728  1.00  0.00           H
ATOM    935 HG12 ILE A  57     193.686 123.833 116.498  1.00  0.00           H
ATOM    936 HG13 ILE A  57     194.427 124.236 118.056  1.00  0.00           H
ATOM    937 HD11 ILE A  57     192.217 123.195 118.367  1.00  0.00           H
ATOM    938 HD12 ILE A  57     192.201 124.880 118.941  1.00  0.00           H
ATOM    939 HD13 ILE A  57     191.465 124.466 117.374  1.00  0.00           H
ATOM    940 HG21 ILE A  57     191.799 126.182 116.151  1.00  0.00           H
ATOM    941 HG22 ILE A  57     192.966 125.660 114.913  1.00  0.00           H
ATOM    942 HG23 ILE A  57     192.958 127.350 115.473  1.00  0.00           H
ATOM    943  N   THR A  58     195.682 127.721 114.530  1.00  0.82           N
ATOM    944  CA  THR A  58     195.932 129.054 113.978  1.00  0.82           C
ATOM    945  C   THR A  58     194.718 129.961 113.895  1.00  0.82           C
ATOM    946  O   THR A  58     194.814 131.131 114.256  1.00  0.82           O
ATOM    947  CB  THR A  58     196.651 129.088 112.638  1.00  0.82           C
ATOM    948  OG1 THR A  58     195.924 128.405 111.636  1.00  0.82           O
ATOM    949  CG2 THR A  58     198.007 128.382 112.769  1.00  0.82           C
ATOM    950  H   THR A  58     195.662 126.924 113.910  1.00  0.00           H
ATOM    951  HA  THR A  58     196.608 129.538 114.683  1.00  0.00           H
ATOM    952  HB  THR A  58     196.807 130.123 112.334  1.00  0.00           H
ATOM    953  HG1 THR A  58     195.048 128.790 111.558  1.00  0.00           H
ATOM    954 HG21 THR A  58     198.524 128.405 111.809  1.00  0.00           H
ATOM    955 HG22 THR A  58     197.850 127.347 113.071  1.00  0.00           H
ATOM    956 HG23 THR A  58     198.611 128.892 113.519  1.00  0.00           H
ATOM    957  N   ASP A  59     193.547 129.464 113.447  1.00  0.82           N
ATOM    958  CA  ASP A  59     192.345 130.282 113.383  1.00  0.82           C
ATOM    959  C   ASP A  59     191.522 130.139 114.672  1.00  0.82           C
ATOM    960  O   ASP A  59     191.800 130.812 115.662  1.00  0.82           O
ATOM    961  CB  ASP A  59     191.544 130.009 112.073  1.00  0.82           C
ATOM    962  CG  ASP A  59     192.282 130.546 110.849  1.00  0.82           C
ATOM    963  OD1 ASP A  59     192.954 131.598 110.974  1.00  0.82           O
ATOM    964  OD2 ASP A  59     192.139 129.986 109.732  1.00  0.82           O
ATOM    965  H   ASP A  59     193.503 128.500 113.148  1.00  0.00           H
ATOM    966  HA  ASP A  59     192.675 131.320 113.337  1.00  0.00           H
ATOM    967  HB2 ASP A  59     191.404 128.934 111.960  1.00  0.00           H
ATOM    968  HB3 ASP A  59     190.569 130.491 112.143  1.00  0.00           H
ATOM    969  N   TYR A  60     190.495 129.263 114.725  1.00  0.81           N
ATOM    970  CA  TYR A  60     189.577 129.225 115.861  1.00  0.81           C
ATOM    971  C   TYR A  60     189.083 127.822 116.207  1.00  0.81           C
ATOM    972  O   TYR A  60     189.209 126.880 115.422  1.00  0.81           O
ATOM    973  CB  TYR A  60     188.369 130.194 115.661  1.00  0.81           C
ATOM    974  CG  TYR A  60     187.508 129.844 114.475  1.00  0.81           C
ATOM    975  CD1 TYR A  60     187.768 130.400 113.213  1.00  0.81           C
ATOM    976  CD2 TYR A  60     186.416 128.972 114.626  1.00  0.81           C
ATOM    977  CE1 TYR A  60     186.952 130.088 112.117  1.00  0.81           C
ATOM    978  CE2 TYR A  60     185.596 128.659 113.533  1.00  0.81           C
ATOM    979  CZ  TYR A  60     185.865 129.225 112.281  1.00  0.81           C
ATOM    980  OH  TYR A  60     185.016 128.952 111.194  1.00  0.81           O
ATOM    981  H   TYR A  60     190.358 128.618 113.960  1.00  0.00           H
ATOM    982  HA  TYR A  60     190.132 129.587 116.727  1.00  0.00           H
ATOM    983  HB2 TYR A  60     187.750 130.163 116.558  1.00  0.00           H
ATOM    984  HB3 TYR A  60     188.749 131.207 115.532  1.00  0.00           H
ATOM    985  HD1 TYR A  60     188.603 131.073 113.085  1.00  0.00           H
ATOM    986  HD2 TYR A  60     186.207 128.539 115.593  1.00  0.00           H
ATOM    987  HE1 TYR A  60     187.163 130.514 111.147  1.00  0.00           H
ATOM    988  HE2 TYR A  60     184.761 127.985 113.656  1.00  0.00           H
ATOM    989  HH  TYR A  60     185.414 128.277 110.639  1.00  0.00           H
ATOM    990  N   LEU A  61     188.486 127.674 117.413  1.00  0.86           N
ATOM    991  CA  LEU A  61     187.890 126.437 117.896  1.00  0.86           C
ATOM    992  C   LEU A  61     186.409 126.652 118.182  1.00  0.86           C
ATOM    993  O   LEU A  61     186.020 127.570 118.907  1.00  0.86           O
ATOM    994  CB  LEU A  61     188.608 125.952 119.185  1.00  0.86           C
ATOM    995  CG  LEU A  61     188.074 124.646 119.822  1.00  0.86           C
ATOM    996  CD1 LEU A  61     188.132 123.457 118.854  1.00  0.86           C
ATOM    997  CD2 LEU A  61     188.875 124.303 121.089  1.00  0.86           C
ATOM    998  H   LEU A  61     188.452 128.480 118.021  1.00  0.00           H
ATOM    999  HA  LEU A  61     187.993 125.672 117.126  1.00  0.00           H
ATOM   1000  HB2 LEU A  61     189.659 125.796 118.940  1.00  0.00           H
ATOM   1001  HB3 LEU A  61     188.545 126.745 119.930  1.00  0.00           H
ATOM   1002  HG  LEU A  61     187.034 124.805 120.107  1.00  0.00           H
ATOM   1003 HD21 LEU A  61     188.838 125.144 121.782  1.00  0.00           H
ATOM   1004 HD22 LEU A  61     189.911 124.100 120.819  1.00  0.00           H
ATOM   1005 HD23 LEU A  61     188.444 123.422 121.564  1.00  0.00           H
ATOM   1006 HD11 LEU A  61     187.566 123.693 117.953  1.00  0.00           H
ATOM   1007 HD12 LEU A  61     189.170 123.255 118.588  1.00  0.00           H
ATOM   1008 HD13 LEU A  61     187.702 122.577 119.333  1.00  0.00           H
ATOM   1009  N   LEU A  62     185.534 125.813 117.592  1.00  0.86           N
ATOM   1010  CA  LEU A  62     184.095 125.930 117.746  1.00  0.86           C
ATOM   1011  C   LEU A  62     183.468 124.603 118.129  1.00  0.86           C
ATOM   1012  O   LEU A  62     183.686 123.575 117.483  1.00  0.86           O
ATOM   1013  CB  LEU A  62     183.472 126.462 116.435  1.00  0.86           C
ATOM   1014  CG  LEU A  62     181.958 126.770 116.451  1.00  0.86           C
ATOM   1015  CD1 LEU A  62     181.663 127.983 115.559  1.00  0.86           C
ATOM   1016  CD2 LEU A  62     181.101 125.587 115.971  1.00  0.86           C
ATOM   1017  H   LEU A  62     185.897 125.067 117.015  1.00  0.00           H
ATOM   1018  HA  LEU A  62     183.891 126.649 118.540  1.00  0.00           H
ATOM   1019  HB2 LEU A  62     183.647 125.715 115.661  1.00  0.00           H
ATOM   1020  HB3 LEU A  62     184.001 127.373 116.153  1.00  0.00           H
ATOM   1021  HG  LEU A  62     181.667 127.014 117.473  1.00  0.00           H
ATOM   1022 HD11 LEU A  62     182.264 128.831 115.887  1.00  0.00           H
ATOM   1023 HD12 LEU A  62     180.606 128.238 115.631  1.00  0.00           H
ATOM   1024 HD13 LEU A  62     181.909 127.742 114.525  1.00  0.00           H
ATOM   1025 HD21 LEU A  62     181.300 124.716 116.596  1.00  0.00           H
ATOM   1026 HD22 LEU A  62     181.350 125.355 114.935  1.00  0.00           H
ATOM   1027 HD23 LEU A  62     180.046 125.851 116.041  1.00  0.00           H
ATOM   1028  N   LEU A  63     182.657 124.615 119.206  1.00  0.84           N
ATOM   1029  CA  LEU A  63     181.924 123.462 119.685  1.00  0.84           C
ATOM   1030  C   LEU A  63     180.441 123.790 119.769  1.00  0.84           C
ATOM   1031  O   LEU A  63     180.019 124.697 120.489  1.00  0.84           O
ATOM   1032  CB  LEU A  63     182.424 123.039 121.086  1.00  0.84           C
ATOM   1033  CG  LEU A  63     183.910 122.634 121.138  1.00  0.84           C
ATOM   1034  CD1 LEU A  63     184.343 122.426 122.590  1.00  0.84           C
ATOM   1035  CD2 LEU A  63     184.190 121.362 120.326  1.00  0.84           C
ATOM   1036  H   LEU A  63     182.554 125.484 119.711  1.00  0.00           H
ATOM   1037  HA  LEU A  63     182.067 122.634 118.990  1.00  0.00           H
ATOM   1038  HB2 LEU A  63     182.275 123.876 121.768  1.00  0.00           H
ATOM   1039  HB3 LEU A  63     181.822 122.198 121.431  1.00  0.00           H
ATOM   1040  HG  LEU A  63     184.502 123.447 120.717  1.00  0.00           H
ATOM   1041 HD11 LEU A  63     184.142 123.331 123.163  1.00  0.00           H
ATOM   1042 HD12 LEU A  63     185.410 122.205 122.623  1.00  0.00           H
ATOM   1043 HD13 LEU A  63     183.786 121.593 123.020  1.00  0.00           H
ATOM   1044 HD21 LEU A  63     183.880 121.515 119.292  1.00  0.00           H
ATOM   1045 HD22 LEU A  63     185.257 121.139 120.356  1.00  0.00           H
ATOM   1046 HD23 LEU A  63     183.633 120.528 120.753  1.00  0.00           H
ATOM   1047  N   PHE A  64     179.609 123.055 119.005  1.00  0.77           N
ATOM   1048  CA  PHE A  64     178.180 123.299 118.927  1.00  0.77           C
ATOM   1049  C   PHE A  64     177.432 121.973 118.922  1.00  0.77           C
ATOM   1050  O   PHE A  64     177.564 121.174 117.997  1.00  0.77           O
ATOM   1051  CB  PHE A  64     177.886 124.145 117.650  1.00  0.77           C
ATOM   1052  CG  PHE A  64     176.424 124.326 117.302  1.00  0.77           C
ATOM   1053  CD1 PHE A  64     175.539 124.979 118.174  1.00  0.77           C
ATOM   1054  CD2 PHE A  64     175.934 123.865 116.068  1.00  0.77           C
ATOM   1055  CE1 PHE A  64     174.198 125.187 117.814  1.00  0.77           C
ATOM   1056  CE2 PHE A  64     174.605 124.093 115.691  1.00  0.77           C
ATOM   1057  CZ  PHE A  64     173.735 124.754 116.566  1.00  0.77           C
ATOM   1058  H   PHE A  64     179.998 122.298 118.461  1.00  0.00           H
ATOM   1059  HA  PHE A  64     177.874 123.870 119.803  1.00  0.00           H
ATOM   1060  HB2 PHE A  64     178.320 125.134 117.797  1.00  0.00           H
ATOM   1061  HB3 PHE A  64     178.385 123.674 116.803  1.00  0.00           H
ATOM   1062  HD1 PHE A  64     175.894 125.326 119.133  1.00  0.00           H
ATOM   1063  HD2 PHE A  64     176.592 123.327 115.401  1.00  0.00           H
ATOM   1064  HE1 PHE A  64     173.525 125.680 118.499  1.00  0.00           H
ATOM   1065  HE2 PHE A  64     174.252 123.759 114.727  1.00  0.00           H
ATOM   1066  HZ  PHE A  64     172.709 124.930 116.279  1.00  0.00           H
ATOM   1067  N   ARG A  65     176.604 121.713 119.956  1.00  0.70           N
ATOM   1068  CA  ARG A  65     175.760 120.528 120.051  1.00  0.70           C
ATOM   1069  C   ARG A  65     176.432 119.169 119.860  1.00  0.70           C
ATOM   1070  O   ARG A  65     176.119 118.414 118.940  1.00  0.70           O
ATOM   1071  CB  ARG A  65     174.476 120.652 119.198  1.00  0.70           C
ATOM   1072  CG  ARG A  65     173.549 121.764 119.725  1.00  0.70           C
ATOM   1073  CD  ARG A  65     172.254 121.891 118.927  1.00  0.70           C
ATOM   1074  NE  ARG A  65     171.339 122.830 119.658  1.00  0.70           N
ATOM   1075  CZ  ARG A  65     170.272 122.467 120.381  1.00  0.70           C
ATOM   1076  NH1 ARG A  65     169.940 121.205 120.609  1.00  0.70           N
ATOM   1077  NH2 ARG A  65     169.539 123.439 120.913  1.00  0.70           N
ATOM   1078  H   ARG A  65     176.567 122.382 120.712  1.00  0.00           H
ATOM   1079  HA  ARG A  65     175.408 120.521 121.083  1.00  0.00           H
ATOM   1080  HB2 ARG A  65     174.756 120.883 118.170  1.00  0.00           H
ATOM   1081  HB3 ARG A  65     173.941 119.702 119.218  1.00  0.00           H
ATOM   1082  HG2 ARG A  65     174.082 122.713 119.674  1.00  0.00           H
ATOM   1083  HG3 ARG A  65     173.302 121.553 120.766  1.00  0.00           H
ATOM   1084  HD2 ARG A  65     172.470 122.286 117.934  1.00  0.00           H
ATOM   1085  HD3 ARG A  65     171.781 120.913 118.838  1.00  0.00           H
ATOM   1086  HE  ARG A  65     171.545 123.817 119.600  1.00  0.00           H
ATOM   1087 HH11 ARG A  65     170.497 120.458 120.219  1.00  0.00           H
ATOM   1088 HH12 ARG A  65     169.130 120.990 121.172  1.00  0.00           H
ATOM   1089 HH21 ARG A  65     169.789 124.405 120.755  1.00  0.00           H
ATOM   1090 HH22 ARG A  65     168.731 123.212 121.475  1.00  0.00           H
ATOM   1091  N   VAL A  66     177.378 118.828 120.752  1.00  0.82           N
ATOM   1092  CA  VAL A  66     177.972 117.505 120.817  1.00  0.82           C
ATOM   1093  C   VAL A  66     177.497 116.862 122.105  1.00  0.82           C
ATOM   1094  O   VAL A  66     177.904 117.250 123.199  1.00  0.82           O
ATOM   1095  CB  VAL A  66     179.495 117.570 120.819  1.00  0.82           C
ATOM   1096  CG1 VAL A  66     180.104 116.156 120.903  1.00  0.82           C
ATOM   1097  CG2 VAL A  66     179.989 118.295 119.551  1.00  0.82           C
ATOM   1098  H   VAL A  66     177.691 119.527 121.410  1.00  0.00           H
ATOM   1099  HA  VAL A  66     177.634 116.912 119.967  1.00  0.00           H
ATOM   1100  HB  VAL A  66     179.817 118.139 121.691  1.00  0.00           H
ATOM   1101 HG11 VAL A  66     181.192 116.228 120.903  1.00  0.00           H
ATOM   1102 HG12 VAL A  66     179.779 115.569 120.044  1.00  0.00           H
ATOM   1103 HG13 VAL A  66     179.772 115.671 121.821  1.00  0.00           H
ATOM   1104 HG21 VAL A  66     181.078 118.339 119.558  1.00  0.00           H
ATOM   1105 HG22 VAL A  66     179.585 119.307 119.531  1.00  0.00           H
ATOM   1106 HG23 VAL A  66     179.653 117.752 118.668  1.00  0.00           H
ATOM   1107  N   TYR A  67     176.591 115.869 122.018  1.00  0.78           N
ATOM   1108  CA  TYR A  67     176.023 115.244 123.201  1.00  0.78           C
ATOM   1109  C   TYR A  67     176.958 114.196 123.791  1.00  0.78           C
ATOM   1110  O   TYR A  67     177.761 113.574 123.097  1.00  0.78           O
ATOM   1111  CB  TYR A  67     174.628 114.627 122.909  1.00  0.78           C
ATOM   1112  CG  TYR A  67     173.554 115.641 122.551  1.00  0.78           C
ATOM   1113  CD1 TYR A  67     173.674 117.040 122.715  1.00  0.78           C
ATOM   1114  CD2 TYR A  67     172.338 115.138 122.056  1.00  0.78           C
ATOM   1115  CE1 TYR A  67     172.623 117.899 122.357  1.00  0.78           C
ATOM   1116  CE2 TYR A  67     171.281 115.993 121.716  1.00  0.78           C
ATOM   1117  CZ  TYR A  67     171.429 117.378 121.849  1.00  0.78           C
ATOM   1118  OH  TYR A  67     170.378 118.245 121.477  1.00  0.78           O
ATOM   1119  H   TYR A  67     176.298 115.550 121.106  1.00  0.00           H
ATOM   1120  HA  TYR A  67     175.887 116.023 123.951  1.00  0.00           H
ATOM   1121  HB2 TYR A  67     174.303 114.085 123.797  1.00  0.00           H
ATOM   1122  HB3 TYR A  67     174.726 113.919 122.086  1.00  0.00           H
ATOM   1123  HD1 TYR A  67     174.586 117.453 123.121  1.00  0.00           H
ATOM   1124  HD2 TYR A  67     172.216 114.072 121.935  1.00  0.00           H
ATOM   1125  HE1 TYR A  67     172.737 118.967 122.474  1.00  0.00           H
ATOM   1126  HE2 TYR A  67     170.351 115.582 121.351  1.00  0.00           H
ATOM   1127  HH  TYR A  67     170.364 118.340 120.522  1.00  0.00           H
ATOM   1128  N   GLY A  68     176.899 113.990 125.123  1.00  0.85           N
ATOM   1129  CA  GLY A  68     177.742 113.028 125.825  1.00  0.85           C
ATOM   1130  C   GLY A  68     179.143 113.489 126.135  1.00  0.85           C
ATOM   1131  O   GLY A  68     179.911 112.771 126.769  1.00  0.85           O
ATOM   1132  H   GLY A  68     176.237 114.530 125.662  1.00  0.00           H
ATOM   1133  HA2 GLY A  68     177.813 112.133 125.208  1.00  0.00           H
ATOM   1134  HA3 GLY A  68     177.253 112.761 126.762  1.00  0.00           H
ATOM   1135  N   LEU A  69     179.529 114.712 125.740  1.00  0.83           N
ATOM   1136  CA  LEU A  69     180.860 115.220 126.011  1.00  0.83           C
ATOM   1137  C   LEU A  69     180.872 116.043 127.289  1.00  0.83           C
ATOM   1138  O   LEU A  69     180.479 117.206 127.311  1.00  0.83           O
ATOM   1139  CB  LEU A  69     181.378 116.057 124.819  1.00  0.83           C
ATOM   1140  CG  LEU A  69     182.804 116.626 124.980  1.00  0.83           C
ATOM   1141  CD1 LEU A  69     183.856 115.530 125.204  1.00  0.83           C
ATOM   1142  CD2 LEU A  69     183.160 117.450 123.737  1.00  0.83           C
ATOM   1143  H   LEU A  69     178.874 115.295 125.240  1.00  0.00           H
ATOM   1144  HA  LEU A  69     181.528 114.370 126.147  1.00  0.00           H
ATOM   1145  HB2 LEU A  69     181.367 115.423 123.933  1.00  0.00           H
ATOM   1146  HB3 LEU A  69     180.691 116.888 124.657  1.00  0.00           H
ATOM   1147  HG  LEU A  69     182.812 117.290 125.844  1.00  0.00           H
ATOM   1148 HD11 LEU A  69     183.594 114.950 126.089  1.00  0.00           H
ATOM   1149 HD12 LEU A  69     183.886 114.873 124.335  1.00  0.00           H
ATOM   1150 HD13 LEU A  69     184.834 115.989 125.346  1.00  0.00           H
ATOM   1151 HD21 LEU A  69     184.166 117.855 123.845  1.00  0.00           H
ATOM   1152 HD22 LEU A  69     183.118 116.812 122.854  1.00  0.00           H
ATOM   1153 HD23 LEU A  69     182.449 118.269 123.628  1.00  0.00           H
ATOM   1154  N   GLU A  70     181.323 115.446 128.412  1.00  0.77           N
ATOM   1155  CA  GLU A  70     181.251 116.088 129.713  1.00  0.77           C
ATOM   1156  C   GLU A  70     182.386 117.065 130.036  1.00  0.77           C
ATOM   1157  O   GLU A  70     182.224 117.941 130.886  1.00  0.77           O
ATOM   1158  CB  GLU A  70     181.196 115.024 130.836  1.00  0.77           C
ATOM   1159  CG  GLU A  70     179.921 114.144 130.816  1.00  0.77           C
ATOM   1160  CD  GLU A  70     179.742 113.332 132.096  1.00  0.77           C
ATOM   1161  OE1 GLU A  70     180.697 113.224 132.909  1.00  0.77           O
ATOM   1162  OE2 GLU A  70     178.599 112.909 132.373  1.00  0.77           O
ATOM   1163  H   GLU A  70     181.724 114.521 128.346  1.00  0.00           H
ATOM   1164  HA  GLU A  70     180.317 116.649 129.749  1.00  0.00           H
ATOM   1165  HB2 GLU A  70     181.241 115.538 131.796  1.00  0.00           H
ATOM   1166  HB3 GLU A  70     182.068 114.376 130.746  1.00  0.00           H
ATOM   1167  HG2 GLU A  70     179.053 114.791 130.690  1.00  0.00           H
ATOM   1168  HG3 GLU A  70     179.977 113.460 129.969  1.00  0.00           H
ATOM   1169  N   SER A  71     183.550 116.960 129.358  1.00  0.84           N
ATOM   1170  CA  SER A  71     184.731 117.780 129.636  1.00  0.84           C
ATOM   1171  C   SER A  71     185.632 117.785 128.420  1.00  0.84           C
ATOM   1172  O   SER A  71     185.580 116.866 127.607  1.00  0.84           O
ATOM   1173  CB  SER A  71     185.575 117.211 130.821  1.00  0.84           C
ATOM   1174  OG  SER A  71     186.739 117.981 131.150  1.00  0.84           O
ATOM   1175  H   SER A  71     183.609 116.277 128.617  1.00  0.00           H
ATOM   1176  HA  SER A  71     184.422 118.800 129.865  1.00  0.00           H
ATOM   1177  HB2 SER A  71     184.936 117.168 131.703  1.00  0.00           H
ATOM   1178  HB3 SER A  71     185.889 116.198 130.569  1.00  0.00           H
ATOM   1179  HG  SER A  71     186.881 117.958 132.099  1.00  0.00           H
ATOM   1180  N   LEU A  72     186.502 118.807 128.265  1.00  0.83           N
ATOM   1181  CA  LEU A  72     187.468 118.850 127.176  1.00  0.83           C
ATOM   1182  C   LEU A  72     188.869 118.486 127.622  1.00  0.83           C
ATOM   1183  O   LEU A  72     189.782 118.445 126.796  1.00  0.83           O
ATOM   1184  CB  LEU A  72     187.571 120.254 126.532  1.00  0.83           C
ATOM   1185  CG  LEU A  72     186.254 120.786 125.953  1.00  0.83           C
ATOM   1186  CD1 LEU A  72     186.411 122.266 125.580  1.00  0.83           C
ATOM   1187  CD2 LEU A  72     185.830 119.955 124.737  1.00  0.83           C
ATOM   1188  H   LEU A  72     186.482 119.569 128.928  1.00  0.00           H
ATOM   1189  HA  LEU A  72     187.155 118.141 126.409  1.00  0.00           H
ATOM   1190  HB2 LEU A  72     187.915 120.954 127.294  1.00  0.00           H
ATOM   1191  HB3 LEU A  72     188.312 120.217 125.734  1.00  0.00           H
ATOM   1192  HG  LEU A  72     185.481 120.702 126.717  1.00  0.00           H
ATOM   1193 HD11 LEU A  72     185.473 122.639 125.169  1.00  0.00           H
ATOM   1194 HD12 LEU A  72     187.201 122.371 124.836  1.00  0.00           H
ATOM   1195 HD13 LEU A  72     186.672 122.839 126.470  1.00  0.00           H
ATOM   1196 HD21 LEU A  72     184.894 120.345 124.338  1.00  0.00           H
ATOM   1197 HD22 LEU A  72     186.603 120.012 123.971  1.00  0.00           H
ATOM   1198 HD23 LEU A  72     185.692 118.916 125.037  1.00  0.00           H
ATOM   1199  N   LYS A  73     189.079 118.179 128.924  1.00  0.81           N
ATOM   1200  CA  LYS A  73     190.400 117.886 129.471  1.00  0.81           C
ATOM   1201  C   LYS A  73     191.064 116.678 128.815  1.00  0.81           C
ATOM   1202  O   LYS A  73     192.261 116.675 128.545  1.00  0.81           O
ATOM   1203  CB  LYS A  73     190.351 117.711 131.023  1.00  0.81           C
ATOM   1204  CG  LYS A  73     189.672 116.416 131.498  1.00  0.81           C
ATOM   1205  CD  LYS A  73     189.438 116.303 133.009  1.00  0.81           C
ATOM   1206  CE  LYS A  73     188.518 115.130 133.385  1.00  0.81           C
ATOM   1207  NZ  LYS A  73     189.022 113.864 132.819  1.00  0.81           N
ATOM   1208  H   LYS A  73     188.284 118.151 129.546  1.00  0.00           H
ATOM   1209  HA  LYS A  73     191.031 118.750 129.265  1.00  0.00           H
ATOM   1210  HB2 LYS A  73     191.374 117.716 131.398  1.00  0.00           H
ATOM   1211  HB3 LYS A  73     189.819 118.560 131.452  1.00  0.00           H
ATOM   1212  HG2 LYS A  73     188.703 116.345 131.003  1.00  0.00           H
ATOM   1213  HG3 LYS A  73     190.283 115.571 131.181  1.00  0.00           H
ATOM   1214  HD2 LYS A  73     188.983 117.229 133.361  1.00  0.00           H
ATOM   1215  HD3 LYS A  73     190.399 116.171 133.506  1.00  0.00           H
ATOM   1216  HE2 LYS A  73     187.518 115.322 132.996  1.00  0.00           H
ATOM   1217  HE3 LYS A  73     188.471 115.044 134.471  1.00  0.00           H
ATOM   1218  HZ1 LYS A  73     188.482 113.622 132.001  1.00  0.00           H
ATOM   1219  HZ2 LYS A  73     188.937 113.130 133.508  1.00  0.00           H
ATOM   1220  HZ3 LYS A  73     189.993 113.973 132.561  1.00  0.00           H
ATOM   1221  N   ASP A  74     190.265 115.627 128.539  1.00  0.83           N
ATOM   1222  CA  ASP A  74     190.678 114.380 127.939  1.00  0.83           C
ATOM   1223  C   ASP A  74     190.920 114.524 126.432  1.00  0.83           C
ATOM   1224  O   ASP A  74     191.922 114.052 125.899  1.00  0.83           O
ATOM   1225  CB  ASP A  74     189.623 113.292 128.285  1.00  0.83           C
ATOM   1226  CG  ASP A  74     189.399 113.266 129.787  1.00  0.83           C
ATOM   1227  OD1 ASP A  74     190.321 112.922 130.567  1.00  0.83           O
ATOM   1228  OD2 ASP A  74     188.303 113.685 130.247  1.00  0.83           O
ATOM   1229  H   ASP A  74     189.287 115.721 128.774  1.00  0.00           H
ATOM   1230  HA  ASP A  74     191.621 114.086 128.400  1.00  0.00           H
ATOM   1231  HB2 ASP A  74     188.684 113.523 127.781  1.00  0.00           H
ATOM   1232  HB3 ASP A  74     189.983 112.318 127.954  1.00  0.00           H
ATOM   1233  N   LEU A  75     190.033 115.243 125.701  1.00  0.84           N
ATOM   1234  CA  LEU A  75     190.200 115.480 124.272  1.00  0.84           C
ATOM   1235  C   LEU A  75     191.439 116.289 123.906  1.00  0.84           C
ATOM   1236  O   LEU A  75     192.198 115.898 123.019  1.00  0.84           O
ATOM   1237  CB  LEU A  75     188.998 116.259 123.666  1.00  0.84           C
ATOM   1238  CG  LEU A  75     187.715 115.444 123.416  1.00  0.84           C
ATOM   1239  CD1 LEU A  75     186.609 116.380 122.911  1.00  0.84           C
ATOM   1240  CD2 LEU A  75     187.932 114.328 122.383  1.00  0.84           C
ATOM   1241  H   LEU A  75     189.224 115.630 126.165  1.00  0.00           H
ATOM   1242  HA  LEU A  75     190.265 114.513 123.772  1.00  0.00           H
ATOM   1243  HB2 LEU A  75     188.749 117.070 124.350  1.00  0.00           H
ATOM   1244  HB3 LEU A  75     189.316 116.696 122.719  1.00  0.00           H
ATOM   1245  HG  LEU A  75     187.394 114.996 124.356  1.00  0.00           H
ATOM   1246 HD11 LEU A  75     186.447 117.176 123.637  1.00  0.00           H
ATOM   1247 HD12 LEU A  75     186.908 116.814 121.957  1.00  0.00           H
ATOM   1248 HD13 LEU A  75     185.686 115.815 122.780  1.00  0.00           H
ATOM   1249 HD21 LEU A  75     188.716 113.657 122.732  1.00  0.00           H
ATOM   1250 HD22 LEU A  75     188.228 114.768 121.430  1.00  0.00           H
ATOM   1251 HD23 LEU A  75     187.006 113.768 122.253  1.00  0.00           H
ATOM   1252  N   PHE A  76     191.684 117.425 124.593  1.00  0.84           N
ATOM   1253  CA  PHE A  76     192.714 118.376 124.194  1.00  0.84           C
ATOM   1254  C   PHE A  76     193.608 118.780 125.360  1.00  0.84           C
ATOM   1255  O   PHE A  76     193.620 119.955 125.734  1.00  0.84           O
ATOM   1256  CB  PHE A  76     192.100 119.681 123.610  1.00  0.84           C
ATOM   1257  CG  PHE A  76     191.298 119.431 122.364  1.00  0.84           C
ATOM   1258  CD1 PHE A  76     191.874 118.798 121.250  1.00  0.84           C
ATOM   1259  CD2 PHE A  76     189.964 119.864 122.287  1.00  0.84           C
ATOM   1260  CE1 PHE A  76     191.124 118.580 120.088  1.00  0.84           C
ATOM   1261  CE2 PHE A  76     189.212 119.655 121.125  1.00  0.84           C
ATOM   1262  CZ  PHE A  76     189.792 119.007 120.027  1.00  0.84           C
ATOM   1263  H   PHE A  76     191.132 117.624 125.415  1.00  0.00           H
ATOM   1264  HA  PHE A  76     193.334 117.912 123.427  1.00  0.00           H
ATOM   1265  HB2 PHE A  76     191.449 120.128 124.361  1.00  0.00           H
ATOM   1266  HB3 PHE A  76     192.905 120.379 123.379  1.00  0.00           H
ATOM   1267  HD1 PHE A  76     192.904 118.477 121.290  1.00  0.00           H
ATOM   1268  HD2 PHE A  76     189.514 120.363 123.133  1.00  0.00           H
ATOM   1269  HE1 PHE A  76     191.572 118.083 119.240  1.00  0.00           H
ATOM   1270  HE2 PHE A  76     188.187 119.992 121.075  1.00  0.00           H
ATOM   1271  HZ  PHE A  76     189.211 118.837 119.133  1.00  0.00           H
ATOM   1272  N   PRO A  77     194.396 117.895 125.967  1.00  0.88           N
ATOM   1273  CA  PRO A  77     195.081 118.187 127.222  1.00  0.88           C
ATOM   1274  C   PRO A  77     196.235 119.151 127.031  1.00  0.88           C
ATOM   1275  O   PRO A  77     196.628 119.813 127.987  1.00  0.88           O
ATOM   1276  CB  PRO A  77     195.573 116.805 127.687  1.00  0.88           C
ATOM   1277  CG  PRO A  77     195.751 116.001 126.395  1.00  0.88           C
ATOM   1278  CD  PRO A  77     194.596 116.507 125.534  1.00  0.88           C
ATOM   1279  HA  PRO A  77     194.374 118.593 127.946  1.00  0.00           H
ATOM   1280  HB2 PRO A  77     196.521 116.893 128.218  1.00  0.00           H
ATOM   1281  HB3 PRO A  77     194.825 116.333 128.325  1.00  0.00           H
ATOM   1282  HG2 PRO A  77     196.713 116.212 125.928  1.00  0.00           H
ATOM   1283  HG3 PRO A  77     195.645 114.934 126.590  1.00  0.00           H
ATOM   1284  HD2 PRO A  77     193.697 115.916 125.709  1.00  0.00           H
ATOM   1285  HD3 PRO A  77     194.869 116.476 124.479  1.00  0.00           H
ATOM   1286  N   ASN A  78     196.811 119.229 125.817  1.00  0.83           N
ATOM   1287  CA  ASN A  78     198.042 119.955 125.557  1.00  0.83           C
ATOM   1288  C   ASN A  78     197.837 121.154 124.641  1.00  0.83           C
ATOM   1289  O   ASN A  78     198.801 121.710 124.124  1.00  0.83           O
ATOM   1290  CB  ASN A  78     199.095 119.001 124.934  1.00  0.83           C
ATOM   1291  CG  ASN A  78     199.470 117.935 125.957  1.00  0.83           C
ATOM   1292  OD1 ASN A  78     199.554 118.180 127.161  1.00  0.83           O
ATOM   1293  ND2 ASN A  78     199.724 116.695 125.484  1.00  0.83           N
ATOM   1294  H   ASN A  78     196.363 118.757 125.045  1.00  0.00           H
ATOM   1295  HA  ASN A  78     198.431 120.317 126.509  1.00  0.00           H
ATOM   1296  HB2 ASN A  78     198.676 118.525 124.047  1.00  0.00           H
ATOM   1297  HB3 ASN A  78     199.983 119.569 124.657  1.00  0.00           H
ATOM   1298 HD21 ASN A  78     199.656 116.509 124.494  1.00  0.00           H
ATOM   1299 HD22 ASN A  78     199.982 115.955 126.121  1.00  0.00           H
ATOM   1300  N   LEU A  79     196.581 121.607 124.429  1.00  0.85           N
ATOM   1301  CA  LEU A  79     196.305 122.798 123.636  1.00  0.85           C
ATOM   1302  C   LEU A  79     196.772 124.083 124.321  1.00  0.85           C
ATOM   1303  O   LEU A  79     196.181 124.539 125.297  1.00  0.85           O
ATOM   1304  CB  LEU A  79     194.794 122.900 123.309  1.00  0.85           C
ATOM   1305  CG  LEU A  79     194.386 124.087 122.405  1.00  0.85           C
ATOM   1306  CD1 LEU A  79     194.976 123.967 120.992  1.00  0.85           C
ATOM   1307  CD2 LEU A  79     192.857 124.200 122.325  1.00  0.85           C
ATOM   1308  H   LEU A  79     195.806 121.102 124.835  1.00  0.00           H
ATOM   1309  HA  LEU A  79     196.846 122.705 122.694  1.00  0.00           H
ATOM   1310  HB2 LEU A  79     194.496 121.979 122.808  1.00  0.00           H
ATOM   1311  HB3 LEU A  79     194.243 122.976 124.246  1.00  0.00           H
ATOM   1312  HG  LEU A  79     194.770 125.003 122.855  1.00  0.00           H
ATOM   1313 HD11 LEU A  79     196.061 123.887 121.056  1.00  0.00           H
ATOM   1314 HD12 LEU A  79     194.711 124.851 120.412  1.00  0.00           H
ATOM   1315 HD13 LEU A  79     194.575 123.078 120.505  1.00  0.00           H
ATOM   1316 HD21 LEU A  79     192.445 124.285 123.331  1.00  0.00           H
ATOM   1317 HD22 LEU A  79     192.452 123.311 121.841  1.00  0.00           H
ATOM   1318 HD23 LEU A  79     192.588 125.084 121.746  1.00  0.00           H
ATOM   1319  N   THR A  80     197.863 124.692 123.815  1.00  0.84           N
ATOM   1320  CA  THR A  80     198.544 125.805 124.474  1.00  0.84           C
ATOM   1321  C   THR A  80     198.113 127.155 123.941  1.00  0.84           C
ATOM   1322  O   THR A  80     197.873 128.092 124.704  1.00  0.84           O
ATOM   1323  CB  THR A  80     200.065 125.711 124.342  1.00  0.84           C
ATOM   1324  OG1 THR A  80     200.518 124.472 124.867  1.00  0.84           O
ATOM   1325  CG2 THR A  80     200.780 126.783 125.180  1.00  0.84           C
ATOM   1326  H   THR A  80     198.229 124.362 122.934  1.00  0.00           H
ATOM   1327  HA  THR A  80     198.297 125.769 125.535  1.00  0.00           H
ATOM   1328  HB  THR A  80     200.355 125.801 123.295  1.00  0.00           H
ATOM   1329  HG1 THR A  80     200.014 123.755 124.476  1.00  0.00           H
ATOM   1330 HG21 THR A  80     201.858 126.681 125.058  1.00  0.00           H
ATOM   1331 HG22 THR A  80     200.469 127.773 124.846  1.00  0.00           H
ATOM   1332 HG23 THR A  80     200.520 126.656 126.231  1.00  0.00           H
ATOM   1333  N   VAL A  81     198.020 127.303 122.600  1.00  0.85           N
ATOM   1334  CA  VAL A  81     197.804 128.597 121.956  1.00  0.85           C
ATOM   1335  C   VAL A  81     196.711 128.505 120.901  1.00  0.85           C
ATOM   1336  O   VAL A  81     196.709 127.619 120.045  1.00  0.85           O
ATOM   1337  CB  VAL A  81     199.073 129.160 121.292  1.00  0.85           C
ATOM   1338  CG1 VAL A  81     198.819 130.550 120.667  1.00  0.85           C
ATOM   1339  CG2 VAL A  81     200.209 129.288 122.326  1.00  0.85           C
ATOM   1340  H   VAL A  81     198.104 126.482 122.017  1.00  0.00           H
ATOM   1341  HA  VAL A  81     197.479 129.304 122.719  1.00  0.00           H
ATOM   1342  HB  VAL A  81     199.390 128.475 120.506  1.00  0.00           H
ATOM   1343 HG11 VAL A  81     198.017 130.478 119.932  1.00  0.00           H
ATOM   1344 HG12 VAL A  81     199.728 130.900 120.179  1.00  0.00           H
ATOM   1345 HG13 VAL A  81     198.533 131.253 121.449  1.00  0.00           H
ATOM   1346 HG21 VAL A  81     200.401 128.315 122.777  1.00  0.00           H
ATOM   1347 HG22 VAL A  81     199.916 129.996 123.101  1.00  0.00           H
ATOM   1348 HG23 VAL A  81     201.112 129.644 121.831  1.00  0.00           H
ATOM   1349  N   ILE A  82     195.761 129.463 120.911  1.00  0.84           N
ATOM   1350  CA  ILE A  82     194.850 129.690 119.795  1.00  0.84           C
ATOM   1351  C   ILE A  82     195.229 131.050 119.221  1.00  0.84           C
ATOM   1352  O   ILE A  82     195.152 132.070 119.901  1.00  0.84           O
ATOM   1353  CB  ILE A  82     193.379 129.645 120.210  1.00  0.84           C
ATOM   1354  CG1 ILE A  82     193.030 128.244 120.777  1.00  0.84           C
ATOM   1355  CG2 ILE A  82     192.477 129.997 119.003  1.00  0.84           C
ATOM   1356  CD1 ILE A  82     191.632 128.159 121.405  1.00  0.84           C
ATOM   1357  H   ILE A  82     195.677 130.050 121.729  1.00  0.00           H
ATOM   1358  HA  ILE A  82     195.025 128.927 119.037  1.00  0.00           H
ATOM   1359  HB  ILE A  82     193.216 130.386 120.992  1.00  0.00           H
ATOM   1360 HG12 ILE A  82     193.085 127.521 119.963  1.00  0.00           H
ATOM   1361 HG13 ILE A  82     193.770 127.978 121.532  1.00  0.00           H
ATOM   1362 HG21 ILE A  82     191.431 129.962 119.308  1.00  0.00           H
ATOM   1363 HG22 ILE A  82     192.719 130.999 118.649  1.00  0.00           H
ATOM   1364 HG23 ILE A  82     192.646 129.278 118.201  1.00  0.00           H
ATOM   1365 HD11 ILE A  82     191.462 127.149 121.779  1.00  0.00           H
ATOM   1366 HD12 ILE A  82     191.561 128.868 122.230  1.00  0.00           H
ATOM   1367 HD13 ILE A  82     190.881 128.400 120.653  1.00  0.00           H
ATOM   1368  N   ARG A  83     195.738 131.109 117.968  1.00  0.76           N
ATOM   1369  CA  ARG A  83     196.268 132.363 117.432  1.00  0.76           C
ATOM   1370  C   ARG A  83     195.212 133.380 117.018  1.00  0.76           C
ATOM   1371  O   ARG A  83     195.396 134.574 117.228  1.00  0.76           O
ATOM   1372  CB  ARG A  83     197.300 132.186 116.283  1.00  0.76           C
ATOM   1373  CG  ARG A  83     198.581 131.436 116.706  1.00  0.76           C
ATOM   1374  CD  ARG A  83     199.639 131.276 115.596  1.00  0.76           C
ATOM   1375  NE  ARG A  83     200.327 132.589 115.308  1.00  0.76           N
ATOM   1376  CZ  ARG A  83     201.511 132.979 115.812  1.00  0.76           C
ATOM   1377  NH1 ARG A  83     202.076 132.389 116.860  1.00  0.76           N
ATOM   1378  NH2 ARG A  83     202.168 133.978 115.229  1.00  0.76           N
ATOM   1379  H   ARG A  83     195.752 130.277 117.396  1.00  0.00           H
ATOM   1380  HA  ARG A  83     196.817 132.825 118.252  1.00  0.00           H
ATOM   1381  HB2 ARG A  83     196.825 131.626 115.477  1.00  0.00           H
ATOM   1382  HB3 ARG A  83     197.579 133.171 115.908  1.00  0.00           H
ATOM   1383  HG2 ARG A  83     198.294 130.441 117.045  1.00  0.00           H
ATOM   1384  HG3 ARG A  83     199.034 131.969 117.542  1.00  0.00           H
ATOM   1385  HD2 ARG A  83     200.383 130.547 115.916  1.00  0.00           H
ATOM   1386  HD3 ARG A  83     199.154 130.918 114.688  1.00  0.00           H
ATOM   1387  HE  ARG A  83     199.858 133.229 114.683  1.00  0.00           H
ATOM   1388 HH11 ARG A  83     201.609 131.620 117.319  1.00  0.00           H
ATOM   1389 HH12 ARG A  83     202.972 132.709 117.197  1.00  0.00           H
ATOM   1390 HH21 ARG A  83     201.772 134.441 114.424  1.00  0.00           H
ATOM   1391 HH22 ARG A  83     203.063 134.273 115.592  1.00  0.00           H
ATOM   1392  N   GLY A  84     194.085 132.956 116.414  1.00  0.85           N
ATOM   1393  CA  GLY A  84     193.028 133.874 116.005  1.00  0.85           C
ATOM   1394  C   GLY A  84     193.337 134.676 114.770  1.00  0.85           C
ATOM   1395  O   GLY A  84     192.994 135.856 114.682  1.00  0.85           O
ATOM   1396  H   GLY A  84     193.968 131.968 116.238  1.00  0.00           H
ATOM   1397  HA2 GLY A  84     192.127 133.291 115.815  1.00  0.00           H
ATOM   1398  HA3 GLY A  84     192.829 134.563 116.826  1.00  0.00           H
ATOM   1399  N   SER A  85     193.999 134.075 113.758  1.00  0.80           N
ATOM   1400  CA  SER A  85     194.262 134.751 112.484  1.00  0.80           C
ATOM   1401  C   SER A  85     192.977 135.097 111.740  1.00  0.80           C
ATOM   1402  O   SER A  85     192.755 136.244 111.345  1.00  0.80           O
ATOM   1403  CB  SER A  85     195.195 133.937 111.548  1.00  0.80           C
ATOM   1404  OG  SER A  85     196.510 133.851 112.100  1.00  0.80           O
ATOM   1405  H   SER A  85     194.324 133.127 113.883  1.00  0.00           H
ATOM   1406  HA  SER A  85     194.768 135.689 112.712  1.00  0.00           H
ATOM   1407  HB2 SER A  85     195.246 134.429 110.577  1.00  0.00           H
ATOM   1408  HB3 SER A  85     194.791 132.932 111.422  1.00  0.00           H
ATOM   1409  HG  SER A  85     197.073 133.345 111.509  1.00  0.00           H
ATOM   1410  N   ARG A  86     192.054 134.128 111.629  1.00  0.74           N
ATOM   1411  CA  ARG A  86     190.664 134.331 111.281  1.00  0.74           C
ATOM   1412  C   ARG A  86     189.818 134.022 112.502  1.00  0.74           C
ATOM   1413  O   ARG A  86     190.225 133.298 113.407  1.00  0.74           O
ATOM   1414  CB  ARG A  86     190.218 133.421 110.114  1.00  0.74           C
ATOM   1415  CG  ARG A  86     191.043 133.669 108.840  1.00  0.74           C
ATOM   1416  CD  ARG A  86     190.838 132.591 107.776  1.00  0.74           C
ATOM   1417  NE  ARG A  86     191.793 132.909 106.661  1.00  0.74           N
ATOM   1418  CZ  ARG A  86     193.078 132.526 106.670  1.00  0.74           C
ATOM   1419  NH1 ARG A  86     193.585 131.743 107.618  1.00  0.74           N
ATOM   1420  NH2 ARG A  86     193.886 132.950 105.695  1.00  0.74           N
ATOM   1421  H   ARG A  86     192.355 133.180 111.803  1.00  0.00           H
ATOM   1422  HA  ARG A  86     190.515 135.373 110.998  1.00  0.00           H
ATOM   1423  HB2 ARG A  86     190.339 132.380 110.414  1.00  0.00           H
ATOM   1424  HB3 ARG A  86     189.166 133.609 109.899  1.00  0.00           H
ATOM   1425  HG2 ARG A  86     190.752 134.632 108.420  1.00  0.00           H
ATOM   1426  HG3 ARG A  86     192.099 133.706 109.106  1.00  0.00           H
ATOM   1427  HD2 ARG A  86     191.056 131.607 108.190  1.00  0.00           H
ATOM   1428  HD3 ARG A  86     189.812 132.621 107.408  1.00  0.00           H
ATOM   1429  HE  ARG A  86     191.452 133.435 105.869  1.00  0.00           H
ATOM   1430 HH11 ARG A  86     192.995 131.411 108.368  1.00  0.00           H
ATOM   1431 HH12 ARG A  86     194.560 131.480 107.588  1.00  0.00           H
ATOM   1432 HH21 ARG A  86     193.526 133.548 104.965  1.00  0.00           H
ATOM   1433 HH22 ARG A  86     194.857 132.673 105.688  1.00  0.00           H
ATOM   1434  N   LEU A  87     188.602 134.591 112.564  1.00  0.83           N
ATOM   1435  CA  LEU A  87     187.744 134.496 113.731  1.00  0.83           C
ATOM   1436  C   LEU A  87     186.358 134.065 113.298  1.00  0.83           C
ATOM   1437  O   LEU A  87     185.992 134.196 112.130  1.00  0.83           O
ATOM   1438  CB  LEU A  87     187.589 135.869 114.443  1.00  0.83           C
ATOM   1439  CG  LEU A  87     188.903 136.510 114.934  1.00  0.83           C
ATOM   1440  CD1 LEU A  87     188.649 137.904 115.528  1.00  0.83           C
ATOM   1441  CD2 LEU A  87     189.620 135.631 115.967  1.00  0.83           C
ATOM   1442  H   LEU A  87     188.270 135.108 111.762  1.00  0.00           H
ATOM   1443  HA  LEU A  87     188.154 133.766 114.429  1.00  0.00           H
ATOM   1444  HB2 LEU A  87     187.119 136.560 113.743  1.00  0.00           H
ATOM   1445  HB3 LEU A  87     186.927 135.741 115.299  1.00  0.00           H
ATOM   1446  HG  LEU A  87     189.563 136.626 114.074  1.00  0.00           H
ATOM   1447 HD21 LEU A  87     189.799 134.643 115.543  1.00  0.00           H
ATOM   1448 HD22 LEU A  87     190.572 136.089 116.235  1.00  0.00           H
ATOM   1449 HD23 LEU A  87     188.999 135.537 116.858  1.00  0.00           H
ATOM   1450 HD11 LEU A  87     188.140 138.526 114.792  1.00  0.00           H
ATOM   1451 HD12 LEU A  87     189.601 138.364 115.795  1.00  0.00           H
ATOM   1452 HD13 LEU A  87     188.027 137.812 116.418  1.00  0.00           H
ATOM   1453  N   PHE A  88     185.524 133.583 114.237  1.00  0.81           N
ATOM   1454  CA  PHE A  88     184.134 133.259 113.977  1.00  0.81           C
ATOM   1455  C   PHE A  88     183.261 134.312 114.651  1.00  0.81           C
ATOM   1456  O   PHE A  88     183.083 134.299 115.866  1.00  0.81           O
ATOM   1457  CB  PHE A  88     183.819 131.851 114.546  1.00  0.81           C
ATOM   1458  CG  PHE A  88     182.465 131.361 114.109  1.00  0.81           C
ATOM   1459  CD1 PHE A  88     182.322 130.683 112.890  1.00  0.81           C
ATOM   1460  CD2 PHE A  88     181.327 131.582 114.904  1.00  0.81           C
ATOM   1461  CE1 PHE A  88     181.070 130.210 112.480  1.00  0.81           C
ATOM   1462  CE2 PHE A  88     180.068 131.134 114.486  1.00  0.81           C
ATOM   1463  CZ  PHE A  88     179.941 130.445 113.273  1.00  0.81           C
ATOM   1464  H   PHE A  88     185.884 133.439 115.170  1.00  0.00           H
ATOM   1465  HA  PHE A  88     183.952 133.267 112.902  1.00  0.00           H
ATOM   1466  HB2 PHE A  88     184.577 131.151 114.195  1.00  0.00           H
ATOM   1467  HB3 PHE A  88     183.849 131.892 115.635  1.00  0.00           H
ATOM   1468  HD1 PHE A  88     183.186 130.524 112.262  1.00  0.00           H
ATOM   1469  HD2 PHE A  88     181.425 132.102 115.846  1.00  0.00           H
ATOM   1470  HE1 PHE A  88     180.975 129.664 111.553  1.00  0.00           H
ATOM   1471  HE2 PHE A  88     179.197 131.319 115.097  1.00  0.00           H
ATOM   1472  HZ  PHE A  88     178.972 130.095 112.950  1.00  0.00           H
ATOM   1473  N   PHE A  89     182.719 135.275 113.870  1.00  0.79           N
ATOM   1474  CA  PHE A  89     181.934 136.409 114.348  1.00  0.79           C
ATOM   1475  C   PHE A  89     182.641 137.198 115.457  1.00  0.79           C
ATOM   1476  O   PHE A  89     182.102 137.424 116.529  1.00  0.79           O
ATOM   1477  CB  PHE A  89     180.495 135.971 114.737  1.00  0.79           C
ATOM   1478  CG  PHE A  89     179.516 137.121 114.756  1.00  0.79           C
ATOM   1479  CD1 PHE A  89     178.920 137.572 113.568  1.00  0.79           C
ATOM   1480  CD2 PHE A  89     179.176 137.758 115.963  1.00  0.79           C
ATOM   1481  CE1 PHE A  89     178.005 138.633 113.583  1.00  0.79           C
ATOM   1482  CE2 PHE A  89     178.274 138.827 115.984  1.00  0.79           C
ATOM   1483  CZ  PHE A  89     177.689 139.267 114.791  1.00  0.79           C
ATOM   1484  H   PHE A  89     182.870 135.203 112.874  1.00  0.00           H
ATOM   1485  HA  PHE A  89     181.831 137.090 113.503  1.00  0.00           H
ATOM   1486  HB2 PHE A  89     180.149 135.232 114.014  1.00  0.00           H
ATOM   1487  HB3 PHE A  89     180.521 135.513 115.726  1.00  0.00           H
ATOM   1488  HD1 PHE A  89     179.170 137.096 112.631  1.00  0.00           H
ATOM   1489  HD2 PHE A  89     179.618 137.417 116.887  1.00  0.00           H
ATOM   1490  HE1 PHE A  89     177.544 138.962 112.663  1.00  0.00           H
ATOM   1491  HE2 PHE A  89     178.030 139.311 116.918  1.00  0.00           H
ATOM   1492  HZ  PHE A  89     176.995 140.094 114.802  1.00  0.00           H
ATOM   1493  N   ASN A  90     183.915 137.577 115.224  1.00  0.79           N
ATOM   1494  CA  ASN A  90     184.819 138.201 116.194  1.00  0.79           C
ATOM   1495  C   ASN A  90     185.256 137.362 117.413  1.00  0.79           C
ATOM   1496  O   ASN A  90     186.026 137.828 118.252  1.00  0.79           O
ATOM   1497  CB  ASN A  90     184.524 139.706 116.520  1.00  0.79           C
ATOM   1498  CG  ASN A  90     183.228 139.993 117.282  1.00  0.79           C
ATOM   1499  OD1 ASN A  90     183.007 139.553 118.408  1.00  0.79           O
ATOM   1500  ND2 ASN A  90     182.346 140.828 116.679  1.00  0.79           N
ATOM   1501  H   ASN A  90     184.279 137.416 114.296  1.00  0.00           H
ATOM   1502  HA  ASN A  90     185.746 138.271 115.625  1.00  0.00           H
ATOM   1503  HB2 ASN A  90     185.352 140.084 117.119  1.00  0.00           H
ATOM   1504  HB3 ASN A  90     184.499 140.261 115.582  1.00  0.00           H
ATOM   1505 HD21 ASN A  90     182.550 141.203 115.764  1.00  0.00           H
ATOM   1506 HD22 ASN A  90     181.485 141.075 117.145  1.00  0.00           H
ATOM   1507  N   TYR A  91     184.892 136.065 117.485  1.00  0.81           N
ATOM   1508  CA  TYR A  91     185.304 135.184 118.566  1.00  0.81           C
ATOM   1509  C   TYR A  91     186.316 134.152 118.087  1.00  0.81           C
ATOM   1510  O   TYR A  91     186.276 133.676 116.952  1.00  0.81           O
ATOM   1511  CB  TYR A  91     184.103 134.418 119.184  1.00  0.81           C
ATOM   1512  CG  TYR A  91     183.081 135.376 119.727  1.00  0.81           C
ATOM   1513  CD1 TYR A  91     183.351 136.120 120.886  1.00  0.81           C
ATOM   1514  CD2 TYR A  91     181.848 135.557 119.080  1.00  0.81           C
ATOM   1515  CE1 TYR A  91     182.435 137.067 121.363  1.00  0.81           C
ATOM   1516  CE2 TYR A  91     180.918 136.488 119.566  1.00  0.81           C
ATOM   1517  CZ  TYR A  91     181.215 137.243 120.703  1.00  0.81           C
ATOM   1518  OH  TYR A  91     180.284 138.173 121.201  1.00  0.81           O
ATOM   1519  H   TYR A  91     184.306 135.688 116.754  1.00  0.00           H
ATOM   1520  HA  TYR A  91     185.768 135.787 119.346  1.00  0.00           H
ATOM   1521  HB2 TYR A  91     183.640 133.800 118.415  1.00  0.00           H
ATOM   1522  HB3 TYR A  91     184.461 133.779 119.991  1.00  0.00           H
ATOM   1523  HD1 TYR A  91     184.278 135.960 121.418  1.00  0.00           H
ATOM   1524  HD2 TYR A  91     181.614 134.975 118.201  1.00  0.00           H
ATOM   1525  HE1 TYR A  91     182.670 137.658 122.236  1.00  0.00           H
ATOM   1526  HE2 TYR A  91     179.973 136.621 119.061  1.00  0.00           H
ATOM   1527  HH  TYR A  91     180.213 138.912 120.592  1.00  0.00           H
ATOM   1528  N   ALA A  92     187.271 133.784 118.963  1.00  0.89           N
ATOM   1529  CA  ALA A  92     188.288 132.787 118.681  1.00  0.89           C
ATOM   1530  C   ALA A  92     187.999 131.463 119.381  1.00  0.89           C
ATOM   1531  O   ALA A  92     188.476 130.403 118.972  1.00  0.89           O
ATOM   1532  CB  ALA A  92     189.649 133.315 119.168  1.00  0.89           C
ATOM   1533  H   ALA A  92     187.280 134.228 119.870  1.00  0.00           H
ATOM   1534  HA  ALA A  92     188.335 132.619 117.605  1.00  0.00           H
ATOM   1535  HB1 ALA A  92     190.422 132.574 118.962  1.00  0.00           H
ATOM   1536  HB2 ALA A  92     189.886 134.242 118.647  1.00  0.00           H
ATOM   1537  HB3 ALA A  92     189.603 133.503 120.241  1.00  0.00           H
ATOM   1538  N   LEU A  93     187.157 131.483 120.431  1.00  0.86           N
ATOM   1539  CA  LEU A  93     186.687 130.279 121.083  1.00  0.86           C
ATOM   1540  C   LEU A  93     185.186 130.395 121.242  1.00  0.86           C
ATOM   1541  O   LEU A  93     184.688 131.333 121.868  1.00  0.86           O
ATOM   1542  CB  LEU A  93     187.364 130.102 122.466  1.00  0.86           C
ATOM   1543  CG  LEU A  93     186.975 128.833 123.257  1.00  0.86           C
ATOM   1544  CD1 LEU A  93     187.346 127.547 122.508  1.00  0.86           C
ATOM   1545  CD2 LEU A  93     187.655 128.837 124.635  1.00  0.86           C
ATOM   1546  H   LEU A  93     186.839 132.376 120.779  1.00  0.00           H
ATOM   1547  HA  LEU A  93     186.917 129.417 120.457  1.00  0.00           H
ATOM   1548  HB2 LEU A  93     187.105 130.967 123.076  1.00  0.00           H
ATOM   1549  HB3 LEU A  93     188.444 130.097 122.320  1.00  0.00           H
ATOM   1550  HG  LEU A  93     185.896 128.842 123.408  1.00  0.00           H
ATOM   1551 HD21 LEU A  93     187.392 129.751 125.168  1.00  0.00           H
ATOM   1552 HD22 LEU A  93     187.319 127.973 125.208  1.00  0.00           H
ATOM   1553 HD23 LEU A  93     188.736 128.790 124.507  1.00  0.00           H
ATOM   1554 HD11 LEU A  93     186.864 127.543 121.530  1.00  0.00           H
ATOM   1555 HD12 LEU A  93     188.427 127.501 122.380  1.00  0.00           H
ATOM   1556 HD13 LEU A  93     187.011 126.683 123.082  1.00  0.00           H
ATOM   1557  N   VAL A  94     184.423 129.455 120.653  1.00  0.86           N
ATOM   1558  CA  VAL A  94     182.968 129.470 120.712  1.00  0.86           C
ATOM   1559  C   VAL A  94     182.474 128.150 121.263  1.00  0.86           C
ATOM   1560  O   VAL A  94     182.688 127.090 120.676  1.00  0.86           O
ATOM   1561  CB  VAL A  94     182.329 129.709 119.344  1.00  0.86           C
ATOM   1562  CG1 VAL A  94     180.788 129.615 119.416  1.00  0.86           C
ATOM   1563  CG2 VAL A  94     182.737 131.105 118.838  1.00  0.86           C
ATOM   1564  H   VAL A  94     184.879 128.708 120.149  1.00  0.00           H
ATOM   1565  HA  VAL A  94     182.655 130.267 121.386  1.00  0.00           H
ATOM   1566  HB  VAL A  94     182.697 128.958 118.645  1.00  0.00           H
ATOM   1567 HG11 VAL A  94     180.500 128.627 119.774  1.00  0.00           H
ATOM   1568 HG12 VAL A  94     180.410 130.374 120.101  1.00  0.00           H
ATOM   1569 HG13 VAL A  94     180.367 129.779 118.424  1.00  0.00           H
ATOM   1570 HG21 VAL A  94     182.286 131.285 117.862  1.00  0.00           H
ATOM   1571 HG22 VAL A  94     182.392 131.862 119.542  1.00  0.00           H
ATOM   1572 HG23 VAL A  94     183.822 131.157 118.752  1.00  0.00           H
ATOM   1573  N   ILE A  95     181.779 128.184 122.417  1.00  0.83           N
ATOM   1574  CA  ILE A  95     181.156 127.005 122.999  1.00  0.83           C
ATOM   1575  C   ILE A  95     179.681 127.321 123.197  1.00  0.83           C
ATOM   1576  O   ILE A  95     179.301 128.127 124.049  1.00  0.83           O
ATOM   1577  CB  ILE A  95     181.851 126.596 124.299  1.00  0.83           C
ATOM   1578  CG1 ILE A  95     183.328 126.231 123.993  1.00  0.83           C
ATOM   1579  CG2 ILE A  95     181.119 125.409 124.958  1.00  0.83           C
ATOM   1580  CD1 ILE A  95     184.175 125.884 125.220  1.00  0.83           C
ATOM   1581  H   ILE A  95     181.687 129.067 122.899  1.00  0.00           H
ATOM   1582  HA  ILE A  95     181.241 126.183 122.288  1.00  0.00           H
ATOM   1583  HB  ILE A  95     181.835 127.442 124.986  1.00  0.00           H
ATOM   1584 HG12 ILE A  95     183.790 127.082 123.493  1.00  0.00           H
ATOM   1585 HG13 ILE A  95     183.340 125.380 123.312  1.00  0.00           H
ATOM   1586 HG21 ILE A  95     181.629 125.134 125.881  1.00  0.00           H
ATOM   1587 HG22 ILE A  95     181.119 124.559 124.276  1.00  0.00           H
ATOM   1588 HG23 ILE A  95     180.091 125.695 125.182  1.00  0.00           H
ATOM   1589 HD11 ILE A  95     185.190 125.643 124.905  1.00  0.00           H
ATOM   1590 HD12 ILE A  95     183.740 125.025 125.730  1.00  0.00           H
ATOM   1591 HD13 ILE A  95     184.198 126.737 125.899  1.00  0.00           H
ATOM   1592  N   PHE A  96     178.806 126.712 122.371  1.00  0.75           N
ATOM   1593  CA  PHE A  96     177.423 127.141 122.254  1.00  0.75           C
ATOM   1594  C   PHE A  96     176.483 125.945 122.266  1.00  0.75           C
ATOM   1595  O   PHE A  96     176.626 125.015 121.474  1.00  0.75           O
ATOM   1596  CB  PHE A  96     177.261 127.955 120.939  1.00  0.75           C
ATOM   1597  CG  PHE A  96     175.967 128.725 120.893  1.00  0.75           C
ATOM   1598  CD1 PHE A  96     175.843 129.948 121.571  1.00  0.75           C
ATOM   1599  CD2 PHE A  96     174.866 128.237 120.172  1.00  0.75           C
ATOM   1600  CE1 PHE A  96     174.641 130.667 121.530  1.00  0.75           C
ATOM   1601  CE2 PHE A  96     173.662 128.950 120.128  1.00  0.75           C
ATOM   1602  CZ  PHE A  96     173.549 130.166 120.812  1.00  0.75           C
ATOM   1603  H   PHE A  96     179.123 125.931 121.815  1.00  0.00           H
ATOM   1604  HA  PHE A  96     177.182 127.786 123.099  1.00  0.00           H
ATOM   1605  HB2 PHE A  96     178.089 128.659 120.859  1.00  0.00           H
ATOM   1606  HB3 PHE A  96     177.296 127.270 120.092  1.00  0.00           H
ATOM   1607  HD1 PHE A  96     176.681 130.338 122.129  1.00  0.00           H
ATOM   1608  HD2 PHE A  96     174.949 127.299 119.644  1.00  0.00           H
ATOM   1609  HE1 PHE A  96     174.557 131.608 122.053  1.00  0.00           H
ATOM   1610  HE2 PHE A  96     172.823 128.563 119.568  1.00  0.00           H
ATOM   1611  HZ  PHE A  96     172.620 130.717 120.786  1.00  0.00           H
ATOM   1612  N   GLU A  97     175.496 125.942 123.188  1.00  0.71           N
ATOM   1613  CA  GLU A  97     174.483 124.899 123.322  1.00  0.71           C
ATOM   1614  C   GLU A  97     175.045 123.477 123.476  1.00  0.71           C
ATOM   1615  O   GLU A  97     174.563 122.502 122.894  1.00  0.71           O
ATOM   1616  CB  GLU A  97     173.368 125.009 122.238  1.00  0.71           C
ATOM   1617  CG  GLU A  97     172.487 126.279 122.399  1.00  0.71           C
ATOM   1618  CD  GLU A  97     171.321 126.387 121.416  1.00  0.71           C
ATOM   1619  OE1 GLU A  97     171.166 125.498 120.537  1.00  0.71           O
ATOM   1620  OE2 GLU A  97     170.511 127.344 121.567  1.00  0.71           O
ATOM   1621  H   GLU A  97     175.456 126.719 123.832  1.00  0.00           H
ATOM   1622  HA  GLU A  97     173.982 125.110 124.267  1.00  0.00           H
ATOM   1623  HB2 GLU A  97     173.840 125.036 121.256  1.00  0.00           H
ATOM   1624  HB3 GLU A  97     172.730 124.127 122.298  1.00  0.00           H
ATOM   1625  HG2 GLU A  97     172.078 126.281 123.409  1.00  0.00           H
ATOM   1626  HG3 GLU A  97     173.121 127.157 122.281  1.00  0.00           H
ATOM   1627  N   MET A  98     176.087 123.319 124.317  1.00  0.74           N
ATOM   1628  CA  MET A  98     176.707 122.042 124.607  1.00  0.74           C
ATOM   1629  C   MET A  98     176.037 121.388 125.797  1.00  0.74           C
ATOM   1630  O   MET A  98     176.435 121.528 126.953  1.00  0.74           O
ATOM   1631  CB  MET A  98     178.219 122.192 124.893  1.00  0.74           C
ATOM   1632  CG  MET A  98     179.038 122.583 123.652  1.00  0.74           C
ATOM   1633  SD  MET A  98     179.227 121.252 122.433  1.00  0.74           S
ATOM   1634  CE  MET A  98     180.468 120.337 123.397  1.00  0.74           C
ATOM   1635  H   MET A  98     176.458 124.141 124.772  1.00  0.00           H
ATOM   1636  HA  MET A  98     176.582 121.393 123.740  1.00  0.00           H
ATOM   1637  HB2 MET A  98     178.595 121.241 125.270  1.00  0.00           H
ATOM   1638  HB3 MET A  98     178.358 122.954 125.660  1.00  0.00           H
ATOM   1639  HG2 MET A  98     178.542 123.423 123.166  1.00  0.00           H
ATOM   1640  HG3 MET A  98     180.029 122.903 123.975  1.00  0.00           H
ATOM   1641  HE1 MET A  98     180.765 119.441 122.851  1.00  0.00           H
ATOM   1642  HE2 MET A  98     180.042 120.052 124.359  1.00  0.00           H
ATOM   1643  HE3 MET A  98     181.341 120.969 123.559  1.00  0.00           H
ATOM   1644  N   VAL A  99     174.971 120.621 125.523  1.00  0.77           N
ATOM   1645  CA  VAL A  99     174.295 119.790 126.502  1.00  0.77           C
ATOM   1646  C   VAL A  99     175.217 118.684 127.019  1.00  0.77           C
ATOM   1647  O   VAL A  99     175.902 118.036 126.235  1.00  0.77           O
ATOM   1648  CB  VAL A  99     173.005 119.209 125.929  1.00  0.77           C
ATOM   1649  CG1 VAL A  99     172.161 118.543 127.033  1.00  0.77           C
ATOM   1650  CG2 VAL A  99     172.191 120.337 125.256  1.00  0.77           C
ATOM   1651  H   VAL A  99     174.617 120.622 124.577  1.00  0.00           H
ATOM   1652  HA  VAL A  99     174.028 120.423 127.348  1.00  0.00           H
ATOM   1653  HB  VAL A  99     173.258 118.460 125.178  1.00  0.00           H
ATOM   1654 HG11 VAL A  99     172.740 117.749 127.504  1.00  0.00           H
ATOM   1655 HG12 VAL A  99     171.256 118.122 126.594  1.00  0.00           H
ATOM   1656 HG13 VAL A  99     171.889 119.287 127.781  1.00  0.00           H
ATOM   1657 HG21 VAL A  99     171.269 119.925 124.846  1.00  0.00           H
ATOM   1658 HG22 VAL A  99     172.780 120.780 124.453  1.00  0.00           H
ATOM   1659 HG23 VAL A  99     171.950 121.102 125.995  1.00  0.00           H
ATOM   1660  N   HIS A 100     175.273 118.496 128.360  1.00  0.71           N
ATOM   1661  CA  HIS A 100     176.093 117.522 129.083  1.00  0.71           C
ATOM   1662  C   HIS A 100     177.480 118.027 129.454  1.00  0.71           C
ATOM   1663  O   HIS A 100     178.106 117.484 130.360  1.00  0.71           O
ATOM   1664  CB  HIS A 100     176.183 116.101 128.458  1.00  0.71           C
ATOM   1665  CG  HIS A 100     174.841 115.484 128.202  1.00  0.71           C
ATOM   1666  ND1 HIS A 100     174.720 114.503 127.234  1.00  0.71           N
ATOM   1667  CD2 HIS A 100     173.652 115.669 128.836  1.00  0.71           C
ATOM   1668  CE1 HIS A 100     173.461 114.117 127.295  1.00  0.71           C
ATOM   1669  NE2 HIS A 100     172.770 114.790 128.247  1.00  0.71           N
ATOM   1670  H   HIS A 100     174.684 119.094 128.923  1.00  0.00           H
ATOM   1671  HA  HIS A 100     175.583 117.378 130.035  1.00  0.00           H
ATOM   1672  HB2 HIS A 100     176.718 116.172 127.511  1.00  0.00           H
ATOM   1673  HB3 HIS A 100     176.745 115.455 129.132  1.00  0.00           H
ATOM   1674  HD2 HIS A 100     173.442 116.363 129.637  1.00  0.00           H
ATOM   1675  HE1 HIS A 100     173.031 113.355 126.662  1.00  0.00           H
ATOM   1676  HE2 HIS A 100     171.795 114.670 128.480  1.00  0.00           H
ATOM   1677  N   LEU A 101     177.984 119.108 128.822  1.00  0.76           N
ATOM   1678  CA  LEU A 101     179.274 119.687 129.165  1.00  0.76           C
ATOM   1679  C   LEU A 101     179.236 120.410 130.509  1.00  0.76           C
ATOM   1680  O   LEU A 101     178.466 121.353 130.691  1.00  0.76           O
ATOM   1681  CB  LEU A 101     179.738 120.658 128.051  1.00  0.76           C
ATOM   1682  CG  LEU A 101     181.192 121.166 128.174  1.00  0.76           C
ATOM   1683  CD1 LEU A 101     182.207 120.079 127.800  1.00  0.76           C
ATOM   1684  CD2 LEU A 101     181.416 122.399 127.290  1.00  0.76           C
ATOM   1685  H   LEU A 101     177.444 119.532 128.081  1.00  0.00           H
ATOM   1686  HA  LEU A 101     180.001 118.878 129.235  1.00  0.00           H
ATOM   1687  HB2 LEU A 101     179.642 120.143 127.095  1.00  0.00           H
ATOM   1688  HB3 LEU A 101     179.071 121.520 128.046  1.00  0.00           H
ATOM   1689  HG  LEU A 101     181.366 121.453 129.211  1.00  0.00           H
ATOM   1690 HD11 LEU A 101     182.049 119.202 128.428  1.00  0.00           H
ATOM   1691 HD12 LEU A 101     183.218 120.458 127.953  1.00  0.00           H
ATOM   1692 HD13 LEU A 101     182.077 119.805 126.753  1.00  0.00           H
ATOM   1693 HD21 LEU A 101     180.695 123.172 127.555  1.00  0.00           H
ATOM   1694 HD22 LEU A 101     181.285 122.124 126.243  1.00  0.00           H
ATOM   1695 HD23 LEU A 101     182.427 122.777 127.443  1.00  0.00           H
ATOM   1696  N   LYS A 102     180.048 119.971 131.499  1.00  0.70           N
ATOM   1697  CA  LYS A 102     179.924 120.474 132.861  1.00  0.70           C
ATOM   1698  C   LYS A 102     181.174 121.124 133.431  1.00  0.70           C
ATOM   1699  O   LYS A 102     181.109 121.803 134.453  1.00  0.70           O
ATOM   1700  CB  LYS A 102     179.415 119.368 133.809  1.00  0.70           C
ATOM   1701  CG  LYS A 102     180.331 118.147 133.918  1.00  0.70           C
ATOM   1702  CD  LYS A 102     179.682 117.037 134.757  1.00  0.70           C
ATOM   1703  CE  LYS A 102     180.555 115.784 134.786  1.00  0.70           C
ATOM   1704  NZ  LYS A 102     179.753 114.558 134.943  1.00  0.70           N
ATOM   1705  H   LYS A 102     180.755 119.280 131.289  1.00  0.00           H
ATOM   1706  HA  LYS A 102     179.154 121.245 132.840  1.00  0.00           H
ATOM   1707  HB2 LYS A 102     178.443 119.032 133.447  1.00  0.00           H
ATOM   1708  HB3 LYS A 102     179.286 119.795 134.803  1.00  0.00           H
ATOM   1709  HG2 LYS A 102     180.533 117.764 132.918  1.00  0.00           H
ATOM   1710  HG3 LYS A 102     181.271 118.445 134.384  1.00  0.00           H
ATOM   1711  HD2 LYS A 102     179.543 117.397 135.776  1.00  0.00           H
ATOM   1712  HD3 LYS A 102     178.711 116.787 134.330  1.00  0.00           H
ATOM   1713  HE2 LYS A 102     181.251 115.859 135.622  1.00  0.00           H
ATOM   1714  HE3 LYS A 102     181.121 115.723 133.856  1.00  0.00           H
ATOM   1715  HZ1 LYS A 102     179.602 114.378 135.925  1.00  0.00           H
ATOM   1716  HZ2 LYS A 102     180.245 113.778 134.530  1.00  0.00           H
ATOM   1717  HZ3 LYS A 102     178.863 114.677 134.481  1.00  0.00           H
ATOM   1718  N   GLU A 103     182.323 121.017 132.742  1.00  0.74           N
ATOM   1719  CA  GLU A 103     183.528 121.741 133.091  1.00  0.74           C
ATOM   1720  C   GLU A 103     184.257 122.006 131.788  1.00  0.74           C
ATOM   1721  O   GLU A 103     184.025 121.321 130.792  1.00  0.74           O
ATOM   1722  CB  GLU A 103     184.447 120.947 134.057  1.00  0.74           C
ATOM   1723  CG  GLU A 103     184.975 119.608 133.481  1.00  0.74           C
ATOM   1724  CD  GLU A 103     185.953 118.876 134.395  1.00  0.74           C
ATOM   1725  OE1 GLU A 103     186.123 119.277 135.568  1.00  0.74           O
ATOM   1726  OE2 GLU A 103     186.590 117.908 133.886  1.00  0.74           O
ATOM   1727  H   GLU A 103     182.347 120.402 131.942  1.00  0.00           H
ATOM   1728  HA  GLU A 103     183.257 122.691 133.551  1.00  0.00           H
ATOM   1729  HB2 GLU A 103     185.304 121.573 134.304  1.00  0.00           H
ATOM   1730  HB3 GLU A 103     183.893 120.738 134.972  1.00  0.00           H
ATOM   1731  HG2 GLU A 103     184.122 118.954 133.300  1.00  0.00           H
ATOM   1732  HG3 GLU A 103     185.469 119.808 132.530  1.00  0.00           H
ATOM   1733  N   LEU A 104     185.145 123.024 131.721  1.00  0.79           N
ATOM   1734  CA  LEU A 104     185.908 123.242 130.499  1.00  0.79           C
ATOM   1735  C   LEU A 104     187.125 122.344 130.396  1.00  0.79           C
ATOM   1736  O   LEU A 104     187.279 121.600 129.435  1.00  0.79           O
ATOM   1737  CB  LEU A 104     186.404 124.705 130.371  1.00  0.79           C
ATOM   1738  CG  LEU A 104     185.312 125.725 130.002  1.00  0.79           C
ATOM   1739  CD1 LEU A 104     185.913 127.137 129.987  1.00  0.79           C
ATOM   1740  CD2 LEU A 104     184.685 125.430 128.632  1.00  0.79           C
ATOM   1741  H   LEU A 104     185.279 123.632 132.516  1.00  0.00           H
ATOM   1742  HA  LEU A 104     185.257 123.029 129.651  1.00  0.00           H
ATOM   1743  HB2 LEU A 104     186.836 125.002 131.327  1.00  0.00           H
ATOM   1744  HB3 LEU A 104     187.184 124.742 129.611  1.00  0.00           H
ATOM   1745  HG  LEU A 104     184.529 125.687 130.759  1.00  0.00           H
ATOM   1746 HD11 LEU A 104     186.360 127.353 130.957  1.00  0.00           H
ATOM   1747 HD12 LEU A 104     185.128 127.864 129.780  1.00  0.00           H
ATOM   1748 HD13 LEU A 104     186.678 127.198 129.213  1.00  0.00           H
ATOM   1749 HD21 LEU A 104     184.256 124.428 128.636  1.00  0.00           H
ATOM   1750 HD22 LEU A 104     183.901 126.159 128.427  1.00  0.00           H
ATOM   1751 HD23 LEU A 104     185.452 125.494 127.860  1.00  0.00           H
ATOM   1752  N   GLY A 105     188.035 122.368 131.386  1.00  0.84           N
ATOM   1753  CA  GLY A 105     189.163 121.445 131.394  1.00  0.84           C
ATOM   1754  C   GLY A 105     190.329 121.722 130.472  1.00  0.84           C
ATOM   1755  O   GLY A 105     191.268 120.936 130.437  1.00  0.84           O
ATOM   1756  H   GLY A 105     187.935 123.037 132.136  1.00  0.00           H
ATOM   1757  HA2 GLY A 105     189.555 121.425 132.411  1.00  0.00           H
ATOM   1758  HA3 GLY A 105     188.783 120.450 131.163  1.00  0.00           H
ATOM   1759  N   LEU A 106     190.356 122.838 129.716  1.00  0.81           N
ATOM   1760  CA  LEU A 106     191.494 123.208 128.874  1.00  0.81           C
ATOM   1761  C   LEU A 106     192.666 123.761 129.688  1.00  0.81           C
ATOM   1762  O   LEU A 106     193.015 124.935 129.608  1.00  0.81           O
ATOM   1763  CB  LEU A 106     191.094 124.252 127.797  1.00  0.81           C
ATOM   1764  CG  LEU A 106     190.142 123.730 126.701  1.00  0.81           C
ATOM   1765  CD1 LEU A 106     189.674 124.896 125.817  1.00  0.81           C
ATOM   1766  CD2 LEU A 106     190.816 122.665 125.822  1.00  0.81           C
ATOM   1767  H   LEU A 106     189.551 123.448 129.732  1.00  0.00           H
ATOM   1768  HA  LEU A 106     191.837 122.310 128.360  1.00  0.00           H
ATOM   1769  HB2 LEU A 106     190.604 125.086 128.300  1.00  0.00           H
ATOM   1770  HB3 LEU A 106     192.002 124.621 127.320  1.00  0.00           H
ATOM   1771  HG  LEU A 106     189.270 123.285 127.180  1.00  0.00           H
ATOM   1772 HD11 LEU A 106     189.195 125.654 126.437  1.00  0.00           H
ATOM   1773 HD12 LEU A 106     188.962 124.528 125.078  1.00  0.00           H
ATOM   1774 HD13 LEU A 106     190.533 125.333 125.308  1.00  0.00           H
ATOM   1775 HD21 LEU A 106     191.149 121.836 126.446  1.00  0.00           H
ATOM   1776 HD22 LEU A 106     191.674 123.104 125.313  1.00  0.00           H
ATOM   1777 HD23 LEU A 106     190.103 122.300 125.083  1.00  0.00           H
ATOM   1778  N   TYR A 107     193.312 122.912 130.510  1.00  0.77           N
ATOM   1779  CA  TYR A 107     194.178 123.358 131.587  1.00  0.77           C
ATOM   1780  C   TYR A 107     195.550 123.883 131.177  1.00  0.77           C
ATOM   1781  O   TYR A 107     196.202 124.585 131.945  1.00  0.77           O
ATOM   1782  CB  TYR A 107     194.267 122.300 132.727  1.00  0.77           C
ATOM   1783  CG  TYR A 107     194.860 120.979 132.300  1.00  0.77           C
ATOM   1784  CD1 TYR A 107     194.038 119.916 131.886  1.00  0.77           C
ATOM   1785  CD2 TYR A 107     196.248 120.775 132.361  1.00  0.77           C
ATOM   1786  CE1 TYR A 107     194.593 118.683 131.515  1.00  0.77           C
ATOM   1787  CE2 TYR A 107     196.805 119.537 132.008  1.00  0.77           C
ATOM   1788  CZ  TYR A 107     195.975 118.493 131.586  1.00  0.77           C
ATOM   1789  OH  TYR A 107     196.524 117.242 131.246  1.00  0.77           O
ATOM   1790  H   TYR A 107     193.188 121.919 130.371  1.00  0.00           H
ATOM   1791  HA  TYR A 107     193.666 124.212 132.030  1.00  0.00           H
ATOM   1792  HB2 TYR A 107     194.885 122.710 133.526  1.00  0.00           H
ATOM   1793  HB3 TYR A 107     193.265 122.123 133.117  1.00  0.00           H
ATOM   1794  HD1 TYR A 107     192.967 120.051 131.853  1.00  0.00           H
ATOM   1795  HD2 TYR A 107     196.893 121.579 132.683  1.00  0.00           H
ATOM   1796  HE1 TYR A 107     193.953 117.882 131.175  1.00  0.00           H
ATOM   1797  HE2 TYR A 107     197.874 119.390 132.062  1.00  0.00           H
ATOM   1798  HH  TYR A 107     196.164 116.567 131.825  1.00  0.00           H
ATOM   1799  N   ASN A 108     195.991 123.601 129.937  1.00  0.81           N
ATOM   1800  CA  ASN A 108     197.210 124.162 129.381  1.00  0.81           C
ATOM   1801  C   ASN A 108     196.946 125.366 128.484  1.00  0.81           C
ATOM   1802  O   ASN A 108     197.876 125.865 127.857  1.00  0.81           O
ATOM   1803  CB  ASN A 108     197.984 123.098 128.555  1.00  0.81           C
ATOM   1804  CG  ASN A 108     198.872 122.265 129.473  1.00  0.81           C
ATOM   1805  OD1 ASN A 108     199.727 122.786 130.192  1.00  0.81           O
ATOM   1806  ND2 ASN A 108     198.712 120.927 129.425  1.00  0.81           N
ATOM   1807  H   ASN A 108     195.448 122.969 129.366  1.00  0.00           H
ATOM   1808  HA  ASN A 108     197.846 124.483 130.206  1.00  0.00           H
ATOM   1809  HB2 ASN A 108     197.272 122.444 128.052  1.00  0.00           H
ATOM   1810  HB3 ASN A 108     198.603 123.599 127.810  1.00  0.00           H
ATOM   1811 HD21 ASN A 108     198.016 120.523 128.814  1.00  0.00           H
ATOM   1812 HD22 ASN A 108     199.288 120.329 130.000  1.00  0.00           H
ATOM   1813  N   LEU A 109     195.705 125.899 128.391  1.00  0.82           N
ATOM   1814  CA  LEU A 109     195.447 127.065 127.556  1.00  0.82           C
ATOM   1815  C   LEU A 109     196.090 128.343 128.102  1.00  0.82           C
ATOM   1816  O   LEU A 109     195.605 128.950 129.055  1.00  0.82           O
ATOM   1817  CB  LEU A 109     193.924 127.280 127.367  1.00  0.82           C
ATOM   1818  CG  LEU A 109     193.519 128.352 126.331  1.00  0.82           C
ATOM   1819  CD1 LEU A 109     193.928 127.953 124.904  1.00  0.82           C
ATOM   1820  CD2 LEU A 109     192.004 128.599 126.387  1.00  0.82           C
ATOM   1821  H   LEU A 109     194.945 125.481 128.909  1.00  0.00           H
ATOM   1822  HA  LEU A 109     195.878 126.871 126.574  1.00  0.00           H
ATOM   1823  HB2 LEU A 109     193.489 126.331 127.053  1.00  0.00           H
ATOM   1824  HB3 LEU A 109     193.494 127.553 128.330  1.00  0.00           H
ATOM   1825  HG  LEU A 109     194.027 129.282 126.585  1.00  0.00           H
ATOM   1826 HD11 LEU A 109     195.003 127.779 124.869  1.00  0.00           H
ATOM   1827 HD12 LEU A 109     193.403 127.042 124.617  1.00  0.00           H
ATOM   1828 HD13 LEU A 109     193.667 128.755 124.214  1.00  0.00           H
ATOM   1829 HD21 LEU A 109     191.719 128.882 127.400  1.00  0.00           H
ATOM   1830 HD22 LEU A 109     191.741 129.402 125.699  1.00  0.00           H
ATOM   1831 HD23 LEU A 109     191.477 127.689 126.101  1.00  0.00           H
ATOM   1832  N   MET A 110     197.217 128.778 127.498  1.00  0.79           N
ATOM   1833  CA  MET A 110     198.018 129.870 128.020  1.00  0.79           C
ATOM   1834  C   MET A 110     197.726 131.190 127.344  1.00  0.79           C
ATOM   1835  O   MET A 110     197.828 132.244 127.962  1.00  0.79           O
ATOM   1836  CB  MET A 110     199.529 129.590 127.796  1.00  0.79           C
ATOM   1837  CG  MET A 110     200.077 128.398 128.600  1.00  0.79           C
ATOM   1838  SD  MET A 110     199.980 128.610 130.400  1.00  0.79           S
ATOM   1839  CE  MET A 110     200.385 126.871 130.712  1.00  0.79           C
ATOM   1840  H   MET A 110     197.515 128.324 126.647  1.00  0.00           H
ATOM   1841  HA  MET A 110     197.830 129.969 129.089  1.00  0.00           H
ATOM   1842  HB2 MET A 110     200.088 130.481 128.083  1.00  0.00           H
ATOM   1843  HB3 MET A 110     199.695 129.401 126.735  1.00  0.00           H
ATOM   1844  HG2 MET A 110     199.505 127.511 128.329  1.00  0.00           H
ATOM   1845  HG3 MET A 110     201.119 128.240 128.323  1.00  0.00           H
ATOM   1846  HE1 MET A 110     200.401 126.688 131.786  1.00  0.00           H
ATOM   1847  HE2 MET A 110     199.633 126.234 130.246  1.00  0.00           H
ATOM   1848  HE3 MET A 110     201.365 126.645 130.291  1.00  0.00           H
ATOM   1849  N   ASN A 111     197.378 131.188 126.044  1.00  0.83           N
ATOM   1850  CA  ASN A 111     197.151 132.441 125.354  1.00  0.83           C
ATOM   1851  C   ASN A 111     196.144 132.258 124.231  1.00  0.83           C
ATOM   1852  O   ASN A 111     196.195 131.294 123.463  1.00  0.83           O
ATOM   1853  CB  ASN A 111     198.505 133.008 124.822  1.00  0.83           C
ATOM   1854  CG  ASN A 111     198.410 134.491 124.479  1.00  0.83           C
ATOM   1855  OD1 ASN A 111     197.392 135.144 124.668  1.00  0.83           O
ATOM   1856  ND2 ASN A 111     199.517 135.070 123.966  1.00  0.83           N
ATOM   1857  H   ASN A 111     197.275 130.313 125.550  1.00  0.00           H
ATOM   1858  HA  ASN A 111     196.740 133.154 126.068  1.00  0.00           H
ATOM   1859  HB2 ASN A 111     198.789 132.457 123.925  1.00  0.00           H
ATOM   1860  HB3 ASN A 111     199.273 132.868 125.583  1.00  0.00           H
ATOM   1861 HD21 ASN A 111     200.353 134.522 123.821  1.00  0.00           H
ATOM   1862 HD22 ASN A 111     199.509 136.051 123.728  1.00  0.00           H
ATOM   1863  N   ILE A 112     195.225 133.227 124.095  1.00  0.83           N
ATOM   1864  CA  ILE A 112     194.445 133.425 122.894  1.00  0.83           C
ATOM   1865  C   ILE A 112     194.925 134.753 122.349  1.00  0.83           C
ATOM   1866  O   ILE A 112     194.580 135.821 122.848  1.00  0.83           O
ATOM   1867  CB  ILE A 112     192.942 133.432 123.156  1.00  0.83           C
ATOM   1868  CG1 ILE A 112     192.506 132.035 123.663  1.00  0.83           C
ATOM   1869  CG2 ILE A 112     192.187 133.822 121.863  1.00  0.83           C
ATOM   1870  CD1 ILE A 112     191.036 131.951 124.087  1.00  0.83           C
ATOM   1871  H   ILE A 112     195.070 133.851 124.874  1.00  0.00           H
ATOM   1872  HA  ILE A 112     194.681 132.637 122.179  1.00  0.00           H
ATOM   1873  HB  ILE A 112     192.723 134.170 123.927  1.00  0.00           H
ATOM   1874 HG12 ILE A 112     192.673 131.314 122.863  1.00  0.00           H
ATOM   1875 HG13 ILE A 112     193.130 131.762 124.514  1.00  0.00           H
ATOM   1876 HG21 ILE A 112     191.114 133.826 122.055  1.00  0.00           H
ATOM   1877 HG22 ILE A 112     192.502 134.816 121.544  1.00  0.00           H
ATOM   1878 HG23 ILE A 112     192.413 133.100 121.078  1.00  0.00           H
ATOM   1879 HD11 ILE A 112     190.813 130.940 124.429  1.00  0.00           H
ATOM   1880 HD12 ILE A 112     190.399 132.196 123.237  1.00  0.00           H
ATOM   1881 HD13 ILE A 112     190.850 132.657 124.896  1.00  0.00           H
ATOM   1882  N   THR A 113     195.769 134.704 121.297  1.00  0.84           N
ATOM   1883  CA  THR A 113     196.526 135.855 120.799  1.00  0.84           C
ATOM   1884  C   THR A 113     195.643 136.939 120.222  1.00  0.84           C
ATOM   1885  O   THR A 113     195.947 138.127 120.279  1.00  0.84           O
ATOM   1886  CB  THR A 113     197.553 135.473 119.732  1.00  0.84           C
ATOM   1887  OG1 THR A 113     198.386 134.415 120.185  1.00  0.84           O
ATOM   1888  CG2 THR A 113     198.496 136.635 119.377  1.00  0.84           C
ATOM   1889  H   THR A 113     195.886 133.819 120.824  1.00  0.00           H
ATOM   1890  HA  THR A 113     197.068 136.284 121.642  1.00  0.00           H
ATOM   1891  HB  THR A 113     197.029 135.153 118.832  1.00  0.00           H
ATOM   1892 HG21 THR A 113     199.204 136.309 118.615  1.00  0.00           H
ATOM   1893 HG22 THR A 113     197.912 137.473 118.995  1.00  0.00           H
ATOM   1894 HG23 THR A 113     199.040 136.947 120.269  1.00  0.00           H
ATOM   1895  HG1 THR A 113     197.844 133.659 120.421  1.00  0.00           H
ATOM   1896  N   ARG A 114     194.519 136.548 119.604  1.00  0.77           N
ATOM   1897  CA  ARG A 114     193.631 137.493 118.983  1.00  0.77           C
ATOM   1898  C   ARG A 114     192.200 136.982 119.010  1.00  0.77           C
ATOM   1899  O   ARG A 114     191.938 135.792 118.850  1.00  0.77           O
ATOM   1900  CB  ARG A 114     194.122 137.735 117.540  1.00  0.77           C
ATOM   1901  CG  ARG A 114     193.301 138.740 116.729  1.00  0.77           C
ATOM   1902  CD  ARG A 114     193.967 139.041 115.389  1.00  0.77           C
ATOM   1903  NE  ARG A 114     193.008 139.868 114.611  1.00  0.77           N
ATOM   1904  CZ  ARG A 114     191.977 139.380 113.918  1.00  0.77           C
ATOM   1905  NH1 ARG A 114     191.822 138.097 113.625  1.00  0.77           N
ATOM   1906  NH2 ARG A 114     191.039 140.248 113.562  1.00  0.77           N
ATOM   1907  H   ARG A 114     194.290 135.565 119.574  1.00  0.00           H
ATOM   1908  HA  ARG A 114     193.679 138.433 119.532  1.00  0.00           H
ATOM   1909  HB2 ARG A 114     195.147 138.101 117.590  1.00  0.00           H
ATOM   1910  HB3 ARG A 114     194.121 136.782 117.011  1.00  0.00           H
ATOM   1911  HG2 ARG A 114     192.309 138.325 116.548  1.00  0.00           H
ATOM   1912  HG3 ARG A 114     193.205 139.665 117.297  1.00  0.00           H
ATOM   1913  HD2 ARG A 114     194.895 139.590 115.546  1.00  0.00           H
ATOM   1914  HD3 ARG A 114     194.171 138.111 114.858  1.00  0.00           H
ATOM   1915  HE  ARG A 114     193.146 140.869 114.606  1.00  0.00           H
ATOM   1916 HH11 ARG A 114     192.520 137.426 113.911  1.00  0.00           H
ATOM   1917 HH12 ARG A 114     191.006 137.791 113.115  1.00  0.00           H
ATOM   1918 HH21 ARG A 114     191.138 141.225 113.799  1.00  0.00           H
ATOM   1919 HH22 ARG A 114     190.225 139.932 113.054  1.00  0.00           H
ATOM   1920  N   GLY A 115     191.221 137.895 119.201  1.00  0.88           N
ATOM   1921  CA  GLY A 115     189.807 137.556 119.330  1.00  0.88           C
ATOM   1922  C   GLY A 115     189.372 137.211 120.729  1.00  0.88           C
ATOM   1923  O   GLY A 115     190.155 137.179 121.672  1.00  0.88           O
ATOM   1924  H   GLY A 115     191.483 138.869 119.258  1.00  0.00           H
ATOM   1925  HA2 GLY A 115     189.603 136.698 118.689  1.00  0.00           H
ATOM   1926  HA3 GLY A 115     189.214 138.401 118.980  1.00  0.00           H
ATOM   1927  N   SER A 116     188.062 136.962 120.887  1.00  0.87           N
ATOM   1928  CA  SER A 116     187.424 136.886 122.197  1.00  0.87           C
ATOM   1929  C   SER A 116     186.776 135.537 122.431  1.00  0.87           C
ATOM   1930  O   SER A 116     186.717 134.686 121.542  1.00  0.87           O
ATOM   1931  CB  SER A 116     186.354 137.993 122.371  1.00  0.87           C
ATOM   1932  OG  SER A 116     186.962 139.272 122.225  1.00  0.87           O
ATOM   1933  H   SER A 116     187.494 136.821 120.064  1.00  0.00           H
ATOM   1934  HA  SER A 116     188.191 137.032 122.958  1.00  0.00           H
ATOM   1935  HB2 SER A 116     185.580 137.871 121.614  1.00  0.00           H
ATOM   1936  HB3 SER A 116     185.908 137.914 123.362  1.00  0.00           H
ATOM   1937  HG  SER A 116     187.354 139.342 121.352  1.00  0.00           H
ATOM   1938  N   VAL A 117     186.271 135.284 123.653  1.00  0.87           N
ATOM   1939  CA  VAL A 117     185.647 134.021 124.028  1.00  0.87           C
ATOM   1940  C   VAL A 117     184.138 134.200 124.156  1.00  0.87           C
ATOM   1941  O   VAL A 117     183.656 135.123 124.815  1.00  0.87           O
ATOM   1942  CB  VAL A 117     186.223 133.490 125.345  1.00  0.87           C
ATOM   1943  CG1 VAL A 117     185.530 132.188 125.790  1.00  0.87           C
ATOM   1944  CG2 VAL A 117     187.731 133.228 125.169  1.00  0.87           C
ATOM   1945  H   VAL A 117     186.328 136.012 124.351  1.00  0.00           H
ATOM   1946  HA  VAL A 117     185.844 133.290 123.244  1.00  0.00           H
ATOM   1947  HB  VAL A 117     186.085 134.245 126.119  1.00  0.00           H
ATOM   1948 HG11 VAL A 117     184.462 132.369 125.916  1.00  0.00           H
ATOM   1949 HG12 VAL A 117     185.681 131.419 125.033  1.00  0.00           H
ATOM   1950 HG13 VAL A 117     185.956 131.855 126.736  1.00  0.00           H
ATOM   1951 HG21 VAL A 117     188.146 132.850 126.103  1.00  0.00           H
ATOM   1952 HG22 VAL A 117     188.232 134.158 124.899  1.00  0.00           H
ATOM   1953 HG23 VAL A 117     187.882 132.491 124.380  1.00  0.00           H
ATOM   1954  N   ARG A 118     183.341 133.304 123.525  1.00  0.76           N
ATOM   1955  CA  ARG A 118     181.901 133.255 123.735  1.00  0.76           C
ATOM   1956  C   ARG A 118     181.476 131.896 124.264  1.00  0.76           C
ATOM   1957  O   ARG A 118     181.664 130.863 123.621  1.00  0.76           O
ATOM   1958  CB  ARG A 118     181.067 133.574 122.467  1.00  0.76           C
ATOM   1959  CG  ARG A 118     179.562 133.789 122.767  1.00  0.76           C
ATOM   1960  CD  ARG A 118     178.724 134.157 121.537  1.00  0.76           C
ATOM   1961  NE  ARG A 118     177.361 134.610 121.997  1.00  0.76           N
ATOM   1962  CZ  ARG A 118     176.866 135.849 121.880  1.00  0.76           C
ATOM   1963  NH1 ARG A 118     177.592 136.894 121.501  1.00  0.76           N
ATOM   1964  NH2 ARG A 118     175.595 136.037 122.221  1.00  0.76           N
ATOM   1965  H   ARG A 118     183.762 132.645 122.885  1.00  0.00           H
ATOM   1966  HA  ARG A 118     181.651 133.998 124.492  1.00  0.00           H
ATOM   1967  HB2 ARG A 118     181.463 134.482 122.011  1.00  0.00           H
ATOM   1968  HB3 ARG A 118     181.171 132.751 121.761  1.00  0.00           H
ATOM   1969  HG2 ARG A 118     179.470 134.594 123.497  1.00  0.00           H
ATOM   1970  HG3 ARG A 118     179.159 132.875 123.203  1.00  0.00           H
ATOM   1971  HD2 ARG A 118     179.212 134.963 120.989  1.00  0.00           H
ATOM   1972  HD3 ARG A 118     178.621 133.285 120.891  1.00  0.00           H
ATOM   1973  HE  ARG A 118     176.769 133.917 122.432  1.00  0.00           H
ATOM   1974 HH11 ARG A 118     178.566 136.772 121.261  1.00  0.00           H
ATOM   1975 HH12 ARG A 118     177.171 137.811 121.453  1.00  0.00           H
ATOM   1976 HH21 ARG A 118     175.035 135.256 122.533  1.00  0.00           H
ATOM   1977 HH22 ARG A 118     175.189 136.960 122.168  1.00  0.00           H
ATOM   1978  N   ILE A 119     180.879 131.872 125.472  1.00  0.78           N
ATOM   1979  CA  ILE A 119     180.377 130.655 126.093  1.00  0.78           C
ATOM   1980  C   ILE A 119     178.945 130.920 126.529  1.00  0.78           C
ATOM   1981  O   ILE A 119     178.697 131.695 127.450  1.00  0.78           O
ATOM   1982  CB  ILE A 119     181.238 130.215 127.282  1.00  0.78           C
ATOM   1983  CG1 ILE A 119     182.686 129.914 126.820  1.00  0.78           C
ATOM   1984  CG2 ILE A 119     180.628 128.975 127.968  1.00  0.78           C
ATOM   1985  CD1 ILE A 119     183.668 129.642 127.965  1.00  0.78           C
ATOM   1986  H   ILE A 119     180.775 132.743 125.972  1.00  0.00           H
ATOM   1987  HA  ILE A 119     180.374 129.858 125.349  1.00  0.00           H
ATOM   1988  HB  ILE A 119     181.269 131.029 128.006  1.00  0.00           H
ATOM   1989 HG12 ILE A 119     182.663 129.036 126.174  1.00  0.00           H
ATOM   1990 HG13 ILE A 119     183.051 130.763 126.242  1.00  0.00           H
ATOM   1991 HD11 ILE A 119     184.658 129.441 127.555  1.00  0.00           H
ATOM   1992 HD12 ILE A 119     183.329 128.778 128.537  1.00  0.00           H
ATOM   1993 HD13 ILE A 119     183.715 130.514 128.618  1.00  0.00           H
ATOM   1994 HG21 ILE A 119     179.611 129.200 128.288  1.00  0.00           H
ATOM   1995 HG22 ILE A 119     180.612 128.142 127.265  1.00  0.00           H
ATOM   1996 HG23 ILE A 119     181.231 128.706 128.836  1.00  0.00           H
ATOM   1997  N   GLU A 120     177.951 130.290 125.873  1.00  0.70           N
ATOM   1998  CA  GLU A 120     176.560 130.645 126.107  1.00  0.70           C
ATOM   1999  C   GLU A 120     175.646 129.437 125.969  1.00  0.70           C
ATOM   2000  O   GLU A 120     175.846 128.581 125.106  1.00  0.70           O
ATOM   2001  CB  GLU A 120     176.125 131.759 125.109  1.00  0.70           C
ATOM   2002  CG  GLU A 120     174.692 132.318 125.317  1.00  0.70           C
ATOM   2003  CD  GLU A 120     174.244 133.323 124.262  1.00  0.70           C
ATOM   2004  OE1 GLU A 120     175.065 133.731 123.397  1.00  0.70           O
ATOM   2005  OE2 GLU A 120     173.041 133.706 124.307  1.00  0.70           O
ATOM   2006  H   GLU A 120     178.175 129.562 125.210  1.00  0.00           H
ATOM   2007  HA  GLU A 120     176.468 131.034 127.121  1.00  0.00           H
ATOM   2008  HB2 GLU A 120     176.182 131.348 124.101  1.00  0.00           H
ATOM   2009  HB3 GLU A 120     176.832 132.585 125.185  1.00  0.00           H
ATOM   2010  HG2 GLU A 120     173.995 131.480 125.306  1.00  0.00           H
ATOM   2011  HG3 GLU A 120     174.644 132.796 126.295  1.00  0.00           H
ATOM   2012  N   LYS A 121     174.620 129.352 126.849  1.00  0.67           N
ATOM   2013  CA  LYS A 121     173.562 128.349 126.852  1.00  0.67           C
ATOM   2014  C   LYS A 121     174.033 126.937 127.182  1.00  0.67           C
ATOM   2015  O   LYS A 121     173.527 125.945 126.656  1.00  0.67           O
ATOM   2016  CB  LYS A 121     172.726 128.326 125.548  1.00  0.67           C
ATOM   2017  CG  LYS A 121     171.760 129.496 125.308  1.00  0.67           C
ATOM   2018  CD  LYS A 121     171.139 129.265 123.926  1.00  0.67           C
ATOM   2019  CE  LYS A 121     170.070 130.241 123.463  1.00  0.67           C
ATOM   2020  NZ  LYS A 121     169.556 129.759 122.173  1.00  0.67           N
ATOM   2021  H   LYS A 121     174.584 130.053 127.575  1.00  0.00           H
ATOM   2022  HA  LYS A 121     172.875 128.634 127.649  1.00  0.00           H
ATOM   2023  HB2 LYS A 121     172.135 127.410 125.555  1.00  0.00           H
ATOM   2024  HB3 LYS A 121     173.415 128.278 124.705  1.00  0.00           H
ATOM   2025  HG2 LYS A 121     170.984 129.507 126.073  1.00  0.00           H
ATOM   2026  HG3 LYS A 121     172.307 130.439 125.318  1.00  0.00           H
ATOM   2027  HD2 LYS A 121     170.692 128.271 123.931  1.00  0.00           H
ATOM   2028  HD3 LYS A 121     171.943 129.270 123.190  1.00  0.00           H
ATOM   2029  HE2 LYS A 121     169.262 130.281 124.193  1.00  0.00           H
ATOM   2030  HE3 LYS A 121     170.505 131.233 123.339  1.00  0.00           H
ATOM   2031  HZ1 LYS A 121     169.044 130.500 121.716  1.00  0.00           H
ATOM   2032  HZ2 LYS A 121     170.329 129.474 121.588  1.00  0.00           H
ATOM   2033  HZ3 LYS A 121     168.943 128.972 122.328  1.00  0.00           H
ATOM   2034  N   ASN A 122     174.992 126.786 128.112  1.00  0.71           N
ATOM   2035  CA  ASN A 122     175.446 125.467 128.503  1.00  0.71           C
ATOM   2036  C   ASN A 122     174.902 125.174 129.887  1.00  0.71           C
ATOM   2037  O   ASN A 122     175.478 125.545 130.907  1.00  0.71           O
ATOM   2038  CB  ASN A 122     176.985 125.370 128.479  1.00  0.71           C
ATOM   2039  CG  ASN A 122     177.485 125.812 127.110  1.00  0.71           C
ATOM   2040  OD1 ASN A 122     177.302 125.140 126.096  1.00  0.71           O
ATOM   2041  ND2 ASN A 122     178.129 126.997 127.062  1.00  0.71           N
ATOM   2042  H   ASN A 122     175.401 127.602 128.544  1.00  0.00           H
ATOM   2043  HA  ASN A 122     175.039 124.736 127.805  1.00  0.00           H
ATOM   2044  HB2 ASN A 122     177.405 126.018 129.249  1.00  0.00           H
ATOM   2045  HB3 ASN A 122     177.289 124.340 128.664  1.00  0.00           H
ATOM   2046 HD21 ASN A 122     178.262 127.534 127.907  1.00  0.00           H
ATOM   2047 HD22 ASN A 122     178.478 127.347 126.181  1.00  0.00           H
ATOM   2048  N   ASN A 123     173.761 124.459 129.948  1.00  0.68           N
ATOM   2049  CA  ASN A 123     172.946 124.353 131.153  1.00  0.68           C
ATOM   2050  C   ASN A 123     173.587 123.573 132.295  1.00  0.68           C
ATOM   2051  O   ASN A 123     173.143 123.681 133.432  1.00  0.68           O
ATOM   2052  CB  ASN A 123     171.551 123.744 130.837  1.00  0.68           C
ATOM   2053  CG  ASN A 123     170.780 124.694 129.927  1.00  0.68           C
ATOM   2054  OD1 ASN A 123     170.721 125.900 130.151  1.00  0.68           O
ATOM   2055  ND2 ASN A 123     170.153 124.155 128.858  1.00  0.68           N
ATOM   2056  H   ASN A 123     173.455 123.972 129.118  1.00  0.00           H
ATOM   2057  HA  ASN A 123     172.777 125.367 131.514  1.00  0.00           H
ATOM   2058  HB2 ASN A 123     171.678 122.784 130.337  1.00  0.00           H
ATOM   2059  HB3 ASN A 123     170.998 123.600 131.765  1.00  0.00           H
ATOM   2060 HD21 ASN A 123     170.209 123.161 128.688  1.00  0.00           H
ATOM   2061 HD22 ASN A 123     169.629 124.746 128.229  1.00  0.00           H
ATOM   2062  N   GLU A 124     174.657 122.796 132.032  1.00  0.68           N
ATOM   2063  CA  GLU A 124     175.364 122.066 133.066  1.00  0.68           C
ATOM   2064  C   GLU A 124     176.723 122.658 133.419  1.00  0.68           C
ATOM   2065  O   GLU A 124     177.431 122.142 134.282  1.00  0.68           O
ATOM   2066  CB  GLU A 124     175.530 120.587 132.648  1.00  0.68           C
ATOM   2067  CG  GLU A 124     174.205 119.777 132.695  1.00  0.68           C
ATOM   2068  CD  GLU A 124     173.634 119.575 134.095  1.00  0.68           C
ATOM   2069  OE1 GLU A 124     174.315 119.949 135.081  1.00  0.68           O
ATOM   2070  OE2 GLU A 124     172.510 119.033 134.205  1.00  0.68           O
ATOM   2071  H   GLU A 124     174.979 122.720 131.078  1.00  0.00           H
ATOM   2072  HA  GLU A 124     174.749 122.088 133.966  1.00  0.00           H
ATOM   2073  HB2 GLU A 124     176.246 120.116 133.322  1.00  0.00           H
ATOM   2074  HB3 GLU A 124     175.927 120.551 131.634  1.00  0.00           H
ATOM   2075  HG2 GLU A 124     173.462 120.306 132.098  1.00  0.00           H
ATOM   2076  HG3 GLU A 124     174.379 118.799 132.246  1.00  0.00           H
ATOM   2077  N   LEU A 125     177.140 123.770 132.784  1.00  0.73           N
ATOM   2078  CA  LEU A 125     178.525 124.204 132.839  1.00  0.73           C
ATOM   2079  C   LEU A 125     178.901 124.996 134.090  1.00  0.73           C
ATOM   2080  O   LEU A 125     178.338 126.054 134.371  1.00  0.73           O
ATOM   2081  CB  LEU A 125     178.839 124.985 131.545  1.00  0.73           C
ATOM   2082  CG  LEU A 125     180.324 125.232 131.223  1.00  0.73           C
ATOM   2083  CD1 LEU A 125     181.096 123.925 131.025  1.00  0.73           C
ATOM   2084  CD2 LEU A 125     180.447 126.066 129.943  1.00  0.73           C
ATOM   2085  H   LEU A 125     176.473 124.316 132.257  1.00  0.00           H
ATOM   2086  HA  LEU A 125     179.143 123.306 132.830  1.00  0.00           H
ATOM   2087  HB2 LEU A 125     178.410 124.428 130.712  1.00  0.00           H
ATOM   2088  HB3 LEU A 125     178.338 125.951 131.601  1.00  0.00           H
ATOM   2089  HG  LEU A 125     180.775 125.785 132.047  1.00  0.00           H
ATOM   2090 HD21 LEU A 125     179.903 127.002 130.065  1.00  0.00           H
ATOM   2091 HD22 LEU A 125     181.498 126.280 129.749  1.00  0.00           H
ATOM   2092 HD23 LEU A 125     180.028 125.509 129.105  1.00  0.00           H
ATOM   2093 HD11 LEU A 125     181.020 123.317 131.927  1.00  0.00           H
ATOM   2094 HD12 LEU A 125     182.144 124.149 130.825  1.00  0.00           H
ATOM   2095 HD13 LEU A 125     180.674 123.378 130.182  1.00  0.00           H
ATOM   2096  N   CYS A 126     179.880 124.471 134.862  1.00  0.74           N
ATOM   2097  CA  CYS A 126     180.428 125.054 136.079  1.00  0.74           C
ATOM   2098  C   CYS A 126     181.937 125.185 135.887  1.00  0.74           C
ATOM   2099  O   CYS A 126     182.436 124.946 134.786  1.00  0.74           O
ATOM   2100  CB  CYS A 126     180.078 124.205 137.331  1.00  0.74           C
ATOM   2101  SG  CYS A 126     178.268 124.113 137.549  1.00  0.74           S
ATOM   2102  H   CYS A 126     180.269 123.588 134.565  1.00  0.00           H
ATOM   2103  HA  CYS A 126     180.006 126.051 136.207  1.00  0.00           H
ATOM   2104  HB2 CYS A 126     180.476 123.198 137.205  1.00  0.00           H
ATOM   2105  HB3 CYS A 126     180.525 124.662 138.214  1.00  0.00           H
ATOM   2106  HG  CYS A 126     177.719 123.528 136.480  1.00  0.00           H
ATOM   2107  N   TYR A 127     182.701 125.639 136.912  1.00  0.73           N
ATOM   2108  CA  TYR A 127     184.116 125.989 136.793  1.00  0.73           C
ATOM   2109  C   TYR A 127     184.400 127.093 135.767  1.00  0.73           C
ATOM   2110  O   TYR A 127     185.331 127.007 134.968  1.00  0.73           O
ATOM   2111  CB  TYR A 127     185.063 124.773 136.544  1.00  0.73           C
ATOM   2112  CG  TYR A 127     185.066 123.824 137.708  1.00  0.73           C
ATOM   2113  CD1 TYR A 127     185.939 124.029 138.790  1.00  0.73           C
ATOM   2114  CD2 TYR A 127     184.214 122.709 137.721  1.00  0.73           C
ATOM   2115  CE1 TYR A 127     185.945 123.145 139.880  1.00  0.73           C
ATOM   2116  CE2 TYR A 127     184.209 121.831 138.814  1.00  0.73           C
ATOM   2117  CZ  TYR A 127     185.065 122.059 139.897  1.00  0.73           C
ATOM   2118  OH  TYR A 127     185.012 121.202 141.014  1.00  0.73           O
ATOM   2119  H   TYR A 127     182.264 125.742 137.817  1.00  0.00           H
ATOM   2120  HA  TYR A 127     184.405 126.399 137.761  1.00  0.00           H
ATOM   2121  HB2 TYR A 127     184.727 124.240 135.655  1.00  0.00           H
ATOM   2122  HB3 TYR A 127     186.077 125.138 136.379  1.00  0.00           H
ATOM   2123  HD1 TYR A 127     186.611 124.874 138.783  1.00  0.00           H
ATOM   2124  HD2 TYR A 127     183.558 122.526 136.883  1.00  0.00           H
ATOM   2125  HE1 TYR A 127     186.627 123.303 140.702  1.00  0.00           H
ATOM   2126  HE2 TYR A 127     183.545 120.979 138.820  1.00  0.00           H
ATOM   2127  HH  TYR A 127     185.771 120.614 141.002  1.00  0.00           H
ATOM   2128  N   LEU A 128     183.593 128.177 135.770  1.00  0.74           N
ATOM   2129  CA  LEU A 128     183.778 129.299 134.856  1.00  0.74           C
ATOM   2130  C   LEU A 128     184.202 130.557 135.591  1.00  0.74           C
ATOM   2131  O   LEU A 128     185.040 131.324 135.116  1.00  0.74           O
ATOM   2132  CB  LEU A 128     182.468 129.623 134.098  1.00  0.74           C
ATOM   2133  CG  LEU A 128     182.011 128.553 133.088  1.00  0.74           C
ATOM   2134  CD1 LEU A 128     180.639 128.950 132.528  1.00  0.74           C
ATOM   2135  CD2 LEU A 128     183.016 128.374 131.940  1.00  0.74           C
ATOM   2136  H   LEU A 128     182.831 128.212 136.432  1.00  0.00           H
ATOM   2137  HA  LEU A 128     184.549 129.039 134.131  1.00  0.00           H
ATOM   2138  HB2 LEU A 128     181.675 129.751 134.835  1.00  0.00           H
ATOM   2139  HB3 LEU A 128     182.601 130.565 133.566  1.00  0.00           H
ATOM   2140  HG  LEU A 128     181.910 127.602 133.612  1.00  0.00           H
ATOM   2141 HD21 LEU A 128     183.987 128.092 132.347  1.00  0.00           H
ATOM   2142 HD22 LEU A 128     183.111 129.311 131.391  1.00  0.00           H
ATOM   2143 HD23 LEU A 128     182.663 127.592 131.267  1.00  0.00           H
ATOM   2144 HD11 LEU A 128     180.307 128.198 131.812  1.00  0.00           H
ATOM   2145 HD12 LEU A 128     179.919 129.017 133.344  1.00  0.00           H
ATOM   2146 HD13 LEU A 128     180.715 129.917 132.031  1.00  0.00           H
ATOM   2147  N   ALA A 129     183.683 130.779 136.815  1.00  0.73           N
ATOM   2148  CA  ALA A 129     184.010 131.933 137.633  1.00  0.73           C
ATOM   2149  C   ALA A 129     185.388 131.812 138.284  1.00  0.73           C
ATOM   2150  O   ALA A 129     185.991 132.781 138.751  1.00  0.73           O
ATOM   2151  CB  ALA A 129     182.924 132.091 138.715  1.00  0.73           C
ATOM   2152  H   ALA A 129     183.029 130.104 137.184  1.00  0.00           H
ATOM   2153  HA  ALA A 129     184.002 132.821 137.000  1.00  0.00           H
ATOM   2154  HB1 ALA A 129     183.155 132.954 139.339  1.00  0.00           H
ATOM   2155  HB2 ALA A 129     181.955 132.236 138.238  1.00  0.00           H
ATOM   2156  HB3 ALA A 129     182.894 131.194 139.333  1.00  0.00           H
ATOM   2157  N   THR A 130     185.944 130.590 138.276  1.00  0.75           N
ATOM   2158  CA  THR A 130     187.223 130.233 138.859  1.00  0.75           C
ATOM   2159  C   THR A 130     188.360 130.367 137.860  1.00  0.75           C
ATOM   2160  O   THR A 130     189.497 130.015 138.156  1.00  0.75           O
ATOM   2161  CB  THR A 130     187.209 128.797 139.373  1.00  0.75           C
ATOM   2162  OG1 THR A 130     186.785 127.890 138.359  1.00  0.75           O
ATOM   2163  CG2 THR A 130     186.192 128.690 140.520  1.00  0.75           C
ATOM   2164  H   THR A 130     185.424 129.852 137.823  1.00  0.00           H
ATOM   2165  HA  THR A 130     187.419 130.900 139.699  1.00  0.00           H
ATOM   2166  HB  THR A 130     188.201 128.520 139.729  1.00  0.00           H
ATOM   2167  HG1 THR A 130     187.554 127.502 137.935  1.00  0.00           H
ATOM   2168 HG21 THR A 130     186.173 127.667 140.896  1.00  0.00           H
ATOM   2169 HG22 THR A 130     186.480 129.367 141.324  1.00  0.00           H
ATOM   2170 HG23 THR A 130     185.202 128.961 140.154  1.00  0.00           H
ATOM   2171  N   ILE A 131     188.111 130.934 136.665  1.00  0.77           N
ATOM   2172  CA  ILE A 131     189.122 131.118 135.635  1.00  0.77           C
ATOM   2173  C   ILE A 131     189.443 132.603 135.519  1.00  0.77           C
ATOM   2174  O   ILE A 131     188.561 133.455 135.424  1.00  0.77           O
ATOM   2175  CB  ILE A 131     188.653 130.559 134.290  1.00  0.77           C
ATOM   2176  CG1 ILE A 131     188.349 129.045 134.412  1.00  0.77           C
ATOM   2177  CG2 ILE A 131     189.718 130.817 133.196  1.00  0.77           C
ATOM   2178  CD1 ILE A 131     187.620 128.485 133.187  1.00  0.77           C
ATOM   2179  H   ILE A 131     187.171 131.249 136.473  1.00  0.00           H
ATOM   2180  HA  ILE A 131     190.026 130.589 135.936  1.00  0.00           H
ATOM   2181  HB  ILE A 131     187.735 131.073 134.005  1.00  0.00           H
ATOM   2182 HG12 ILE A 131     189.291 128.509 134.532  1.00  0.00           H
ATOM   2183 HG13 ILE A 131     187.733 128.879 135.296  1.00  0.00           H
ATOM   2184 HG21 ILE A 131     189.369 130.413 132.246  1.00  0.00           H
ATOM   2185 HG22 ILE A 131     190.652 130.330 133.476  1.00  0.00           H
ATOM   2186 HG23 ILE A 131     189.884 131.890 133.096  1.00  0.00           H
ATOM   2187 HD11 ILE A 131     187.434 127.421 133.330  1.00  0.00           H
ATOM   2188 HD12 ILE A 131     188.236 128.630 132.300  1.00  0.00           H
ATOM   2189 HD13 ILE A 131     186.671 129.006 133.059  1.00  0.00           H
ATOM   2190  N   ASP A 132     190.742 132.969 135.539  1.00  0.77           N
ATOM   2191  CA  ASP A 132     191.188 134.324 135.289  1.00  0.77           C
ATOM   2192  C   ASP A 132     191.480 134.472 133.799  1.00  0.77           C
ATOM   2193  O   ASP A 132     192.518 134.052 133.286  1.00  0.77           O
ATOM   2194  CB  ASP A 132     192.442 134.640 136.146  1.00  0.77           C
ATOM   2195  CG  ASP A 132     192.840 136.103 136.137  1.00  0.77           C
ATOM   2196  OD1 ASP A 132     192.354 136.857 135.255  1.00  0.77           O
ATOM   2197  OD2 ASP A 132     193.643 136.475 137.037  1.00  0.77           O
ATOM   2198  H   ASP A 132     191.437 132.264 135.738  1.00  0.00           H
ATOM   2199  HA  ASP A 132     190.390 135.014 135.563  1.00  0.00           H
ATOM   2200  HB2 ASP A 132     192.237 134.347 137.176  1.00  0.00           H
ATOM   2201  HB3 ASP A 132     193.278 134.048 135.774  1.00  0.00           H
ATOM   2202  N   TRP A 133     190.552 135.093 133.049  1.00  0.76           N
ATOM   2203  CA  TRP A 133     190.701 135.263 131.615  1.00  0.76           C
ATOM   2204  C   TRP A 133     191.687 136.356 131.233  1.00  0.76           C
ATOM   2205  O   TRP A 133     192.120 136.424 130.086  1.00  0.76           O
ATOM   2206  CB  TRP A 133     189.348 135.546 130.918  1.00  0.76           C
ATOM   2207  CG  TRP A 133     188.375 134.383 130.974  1.00  0.76           C
ATOM   2208  CD1 TRP A 133     187.252 134.237 131.741  1.00  0.76           C
ATOM   2209  CD2 TRP A 133     188.488 133.181 130.186  1.00  0.76           C
ATOM   2210  NE1 TRP A 133     186.648 133.027 131.477  1.00  0.76           N
ATOM   2211  CE2 TRP A 133     187.388 132.364 130.523  1.00  0.76           C
ATOM   2212  CE3 TRP A 133     189.432 132.765 129.245  1.00  0.76           C
ATOM   2213  CZ2 TRP A 133     187.207 131.125 129.922  1.00  0.76           C
ATOM   2214  CZ3 TRP A 133     189.252 131.509 128.643  1.00  0.76           C
ATOM   2215  CH2 TRP A 133     188.152 130.702 128.973  1.00  0.76           C
ATOM   2216  H   TRP A 133     189.723 135.453 133.499  1.00  0.00           H
ATOM   2217  HA  TRP A 133     191.084 134.325 131.214  1.00  0.00           H
ATOM   2218  HB2 TRP A 133     189.543 135.781 129.872  1.00  0.00           H
ATOM   2219  HB3 TRP A 133     188.885 136.412 131.391  1.00  0.00           H
ATOM   2220  HD1 TRP A 133     186.891 134.966 132.452  1.00  0.00           H
ATOM   2221  HE3 TRP A 133     190.275 133.390 128.988  1.00  0.00           H
ATOM   2222  HZ2 TRP A 133     186.362 130.503 130.178  1.00  0.00           H
ATOM   2223  HZ3 TRP A 133     189.970 131.159 127.916  1.00  0.00           H
ATOM   2224  HH2 TRP A 133     188.031 129.743 128.491  1.00  0.00           H
ATOM   2225  HE1 TRP A 133     185.803 132.683 131.911  1.00  0.00           H
ATOM   2226  N   SER A 134     192.122 137.212 132.186  1.00  0.77           N
ATOM   2227  CA  SER A 134     193.067 138.298 131.927  1.00  0.77           C
ATOM   2228  C   SER A 134     194.498 137.800 131.897  1.00  0.77           C
ATOM   2229  O   SER A 134     195.446 138.521 131.605  1.00  0.77           O
ATOM   2230  CB  SER A 134     192.961 139.430 132.987  1.00  0.77           C
ATOM   2231  OG  SER A 134     193.411 139.066 134.297  1.00  0.77           O
ATOM   2232  H   SER A 134     191.775 137.095 133.127  1.00  0.00           H
ATOM   2233  HA  SER A 134     192.835 138.724 130.951  1.00  0.00           H
ATOM   2234  HB2 SER A 134     193.560 140.273 132.644  1.00  0.00           H
ATOM   2235  HB3 SER A 134     191.920 139.748 133.053  1.00  0.00           H
ATOM   2236  HG  SER A 134     192.757 138.501 134.715  1.00  0.00           H
ATOM   2237  N   ARG A 135     194.669 136.499 132.171  1.00  0.71           N
ATOM   2238  CA  ARG A 135     195.912 135.789 132.014  1.00  0.71           C
ATOM   2239  C   ARG A 135     195.959 135.022 130.705  1.00  0.71           C
ATOM   2240  O   ARG A 135     196.917 134.298 130.462  1.00  0.71           O
ATOM   2241  CB  ARG A 135     196.047 134.782 133.183  1.00  0.71           C
ATOM   2242  CG  ARG A 135     196.166 135.464 134.559  1.00  0.71           C
ATOM   2243  CD  ARG A 135     197.475 136.235 134.708  1.00  0.71           C
ATOM   2244  NE  ARG A 135     197.441 136.889 136.048  1.00  0.71           N
ATOM   2245  CZ  ARG A 135     198.507 137.477 136.605  1.00  0.71           C
ATOM   2246  NH1 ARG A 135     199.705 137.431 136.026  1.00  0.71           N
ATOM   2247  NH2 ARG A 135     198.376 138.121 137.760  1.00  0.71           N
ATOM   2248  H   ARG A 135     193.871 135.981 132.511  1.00  0.00           H
ATOM   2249  HA  ARG A 135     196.740 136.497 132.049  1.00  0.00           H
ATOM   2250  HB2 ARG A 135     195.167 134.139 133.190  1.00  0.00           H
ATOM   2251  HB3 ARG A 135     196.931 134.167 133.017  1.00  0.00           H
ATOM   2252  HG2 ARG A 135     196.118 134.700 135.335  1.00  0.00           H
ATOM   2253  HG3 ARG A 135     195.331 136.153 134.687  1.00  0.00           H
ATOM   2254  HD2 ARG A 135     198.322 135.552 134.646  1.00  0.00           H
ATOM   2255  HD3 ARG A 135     197.551 136.992 133.927  1.00  0.00           H
ATOM   2256  HE  ARG A 135     196.571 136.888 136.561  1.00  0.00           H
ATOM   2257 HH11 ARG A 135     199.823 136.946 135.148  1.00  0.00           H
ATOM   2258 HH12 ARG A 135     200.495 137.881 136.465  1.00  0.00           H
ATOM   2259 HH21 ARG A 135     197.475 138.166 138.214  1.00  0.00           H
ATOM   2260 HH22 ARG A 135     199.178 138.566 138.184  1.00  0.00           H
ATOM   2261  N   ILE A 136     194.923 135.153 129.846  1.00  0.79           N
ATOM   2262  CA  ILE A 136     194.810 134.389 128.607  1.00  0.79           C
ATOM   2263  C   ILE A 136     194.427 135.301 127.438  1.00  0.79           C
ATOM   2264  O   ILE A 136     194.777 135.027 126.294  1.00  0.79           O
ATOM   2265  CB  ILE A 136     193.766 133.261 128.742  1.00  0.79           C
ATOM   2266  CG1 ILE A 136     194.079 132.339 129.948  1.00  0.79           C
ATOM   2267  CG2 ILE A 136     193.709 132.410 127.449  1.00  0.79           C
ATOM   2268  CD1 ILE A 136     192.970 131.328 130.260  1.00  0.79           C
ATOM   2269  H   ILE A 136     194.192 135.812 130.073  1.00  0.00           H
ATOM   2270  HA  ILE A 136     195.779 133.938 128.390  1.00  0.00           H
ATOM   2271  HB  ILE A 136     192.787 133.714 128.900  1.00  0.00           H
ATOM   2272 HG12 ILE A 136     194.994 131.788 129.731  1.00  0.00           H
ATOM   2273 HG13 ILE A 136     194.245 132.959 130.829  1.00  0.00           H
ATOM   2274 HG21 ILE A 136     193.489 133.055 126.598  1.00  0.00           H
ATOM   2275 HG22 ILE A 136     194.670 131.920 127.294  1.00  0.00           H
ATOM   2276 HG23 ILE A 136     192.928 131.656 127.545  1.00  0.00           H
ATOM   2277 HD11 ILE A 136     193.263 130.720 131.116  1.00  0.00           H
ATOM   2278 HD12 ILE A 136     192.048 131.861 130.492  1.00  0.00           H
ATOM   2279 HD13 ILE A 136     192.811 130.685 129.394  1.00  0.00           H
ATOM   2280  N   LEU A 137     193.709 136.420 127.684  1.00  0.81           N
ATOM   2281  CA  LEU A 137     193.326 137.392 126.666  1.00  0.81           C
ATOM   2282  C   LEU A 137     193.737 138.793 127.101  1.00  0.81           C
ATOM   2283  O   LEU A 137     193.525 139.160 128.257  1.00  0.81           O
ATOM   2284  CB  LEU A 137     191.785 137.499 126.491  1.00  0.81           C
ATOM   2285  CG  LEU A 137     191.074 136.365 125.734  1.00  0.81           C
ATOM   2286  CD1 LEU A 137     190.876 135.103 126.582  1.00  0.81           C
ATOM   2287  CD2 LEU A 137     189.711 136.892 125.277  1.00  0.81           C
ATOM   2288  H   LEU A 137     193.419 136.594 128.636  1.00  0.00           H
ATOM   2289  HA  LEU A 137     193.795 137.142 125.714  1.00  0.00           H
ATOM   2290  HB2 LEU A 137     191.581 138.426 125.955  1.00  0.00           H
ATOM   2291  HB3 LEU A 137     191.337 137.576 127.482  1.00  0.00           H
ATOM   2292  HG  LEU A 137     191.663 136.107 124.854  1.00  0.00           H
ATOM   2293 HD11 LEU A 137     191.846 134.727 126.908  1.00  0.00           H
ATOM   2294 HD12 LEU A 137     190.268 135.343 127.454  1.00  0.00           H
ATOM   2295 HD13 LEU A 137     190.372 134.341 125.987  1.00  0.00           H
ATOM   2296 HD21 LEU A 137     189.181 136.109 124.735  1.00  0.00           H
ATOM   2297 HD22 LEU A 137     189.855 137.752 124.623  1.00  0.00           H
ATOM   2298 HD23 LEU A 137     189.127 137.191 126.147  1.00  0.00           H
ATOM   2299  N   ASP A 138     194.268 139.634 126.179  1.00  0.76           N
ATOM   2300  CA  ASP A 138     194.471 141.059 126.427  1.00  0.76           C
ATOM   2301  C   ASP A 138     193.181 141.853 126.689  1.00  0.76           C
ATOM   2302  O   ASP A 138     193.054 142.571 127.679  1.00  0.76           O
ATOM   2303  CB  ASP A 138     195.167 141.725 125.212  1.00  0.76           C
ATOM   2304  CG  ASP A 138     196.553 141.151 124.990  1.00  0.76           C
ATOM   2305  OD1 ASP A 138     197.395 141.269 125.911  1.00  0.76           O
ATOM   2306  OD2 ASP A 138     196.780 140.616 123.878  1.00  0.76           O
ATOM   2307  H   ASP A 138     194.535 139.258 125.280  1.00  0.00           H
ATOM   2308  HA  ASP A 138     195.121 141.166 127.295  1.00  0.00           H
ATOM   2309  HB2 ASP A 138     194.565 141.554 124.320  1.00  0.00           H
ATOM   2310  HB3 ASP A 138     195.248 142.797 125.389  1.00  0.00           H
ATOM   2311  N   SER A 139     192.149 141.708 125.824  1.00  0.77           N
ATOM   2312  CA  SER A 139     190.859 142.348 126.046  1.00  0.77           C
ATOM   2313  C   SER A 139     189.912 141.316 126.600  1.00  0.77           C
ATOM   2314  O   SER A 139     189.553 140.347 125.937  1.00  0.77           O
ATOM   2315  CB  SER A 139     190.172 142.972 124.803  1.00  0.77           C
ATOM   2316  OG  SER A 139     189.000 143.665 125.237  1.00  0.77           O
ATOM   2317  H   SER A 139     192.278 141.139 125.000  1.00  0.00           H
ATOM   2318  HA  SER A 139     190.989 143.130 126.794  1.00  0.00           H
ATOM   2319  HB2 SER A 139     190.854 143.670 124.317  1.00  0.00           H
ATOM   2320  HB3 SER A 139     189.894 142.184 124.103  1.00  0.00           H
ATOM   2321  HG  SER A 139     188.271 143.464 124.645  1.00  0.00           H
ATOM   2322  N   VAL A 140     189.472 141.505 127.852  1.00  0.79           N
ATOM   2323  CA  VAL A 140     188.472 140.653 128.461  1.00  0.79           C
ATOM   2324  C   VAL A 140     187.129 141.350 128.520  1.00  0.79           C
ATOM   2325  O   VAL A 140     186.135 140.750 128.926  1.00  0.79           O
ATOM   2326  CB  VAL A 140     188.895 140.186 129.848  1.00  0.79           C
ATOM   2327  CG1 VAL A 140     190.085 139.224 129.681  1.00  0.79           C
ATOM   2328  CG2 VAL A 140     189.279 141.372 130.754  1.00  0.79           C
ATOM   2329  H   VAL A 140     189.852 142.270 128.391  1.00  0.00           H
ATOM   2330  HA  VAL A 140     188.361 139.769 127.832  1.00  0.00           H
ATOM   2331  HB  VAL A 140     188.066 139.646 130.306  1.00  0.00           H
ATOM   2332 HG11 VAL A 140     190.409 138.873 130.661  1.00  0.00           H
ATOM   2333 HG12 VAL A 140     189.781 138.372 129.073  1.00  0.00           H
ATOM   2334 HG13 VAL A 140     190.907 139.745 129.191  1.00  0.00           H
ATOM   2335 HG21 VAL A 140     188.425 142.041 130.860  1.00  0.00           H
ATOM   2336 HG22 VAL A 140     190.112 141.915 130.308  1.00  0.00           H
ATOM   2337 HG23 VAL A 140     189.572 140.999 131.735  1.00  0.00           H
ATOM   2338  N   GLU A 141     187.054 142.613 128.049  1.00  0.73           N
ATOM   2339  CA  GLU A 141     185.836 143.403 127.987  1.00  0.73           C
ATOM   2340  C   GLU A 141     184.900 142.915 126.894  1.00  0.73           C
ATOM   2341  O   GLU A 141     183.680 143.035 126.981  1.00  0.73           O
ATOM   2342  CB  GLU A 141     186.190 144.891 127.764  1.00  0.73           C
ATOM   2343  CG  GLU A 141     186.991 145.484 128.952  1.00  0.73           C
ATOM   2344  CD  GLU A 141     187.304 146.974 128.813  1.00  0.73           C
ATOM   2345  OE1 GLU A 141     186.863 147.610 127.825  1.00  0.73           O
ATOM   2346  OE2 GLU A 141     187.992 147.483 129.736  1.00  0.73           O
ATOM   2347  H   GLU A 141     187.906 143.040 127.715  1.00  0.00           H
ATOM   2348  HA  GLU A 141     185.321 143.313 128.944  1.00  0.00           H
ATOM   2349  HB2 GLU A 141     186.790 144.978 126.858  1.00  0.00           H
ATOM   2350  HB3 GLU A 141     185.269 145.460 127.637  1.00  0.00           H
ATOM   2351  HG2 GLU A 141     186.409 145.340 129.862  1.00  0.00           H
ATOM   2352  HG3 GLU A 141     187.929 144.938 129.048  1.00  0.00           H
ATOM   2353  N   ASP A 142     185.470 142.281 125.853  1.00  0.76           N
ATOM   2354  CA  ASP A 142     184.734 141.786 124.712  1.00  0.76           C
ATOM   2355  C   ASP A 142     184.385 140.302 124.830  1.00  0.76           C
ATOM   2356  O   ASP A 142     183.831 139.694 123.913  1.00  0.76           O
ATOM   2357  CB  ASP A 142     185.579 142.035 123.447  1.00  0.76           C
ATOM   2358  CG  ASP A 142     185.932 143.507 123.359  1.00  0.76           C
ATOM   2359  OD1 ASP A 142     185.010 144.343 123.193  1.00  0.76           O
ATOM   2360  OD2 ASP A 142     187.146 143.805 123.460  1.00  0.76           O
ATOM   2361  H   ASP A 142     186.470 142.143 125.870  1.00  0.00           H
ATOM   2362  HA  ASP A 142     183.807 142.353 124.626  1.00  0.00           H
ATOM   2363  HB2 ASP A 142     185.008 141.745 122.565  1.00  0.00           H
ATOM   2364  HB3 ASP A 142     186.494 141.444 123.498  1.00  0.00           H
ATOM   2365  N   ASN A 143     184.687 139.664 125.982  1.00  0.81           N
ATOM   2366  CA  ASN A 143     184.201 138.326 126.288  1.00  0.81           C
ATOM   2367  C   ASN A 143     182.703 138.286 126.535  1.00  0.81           C
ATOM   2368  O   ASN A 143     182.121 139.187 127.131  1.00  0.81           O
ATOM   2369  CB  ASN A 143     184.890 137.707 127.527  1.00  0.81           C
ATOM   2370  CG  ASN A 143     186.297 137.268 127.167  1.00  0.81           C
ATOM   2371  OD1 ASN A 143     186.575 136.820 126.054  1.00  0.81           O
ATOM   2372  ND2 ASN A 143     187.214 137.345 128.157  1.00  0.81           N
ATOM   2373  H   ASN A 143     185.273 140.134 126.657  1.00  0.00           H
ATOM   2374  HA  ASN A 143     184.416 137.687 125.431  1.00  0.00           H
ATOM   2375  HB2 ASN A 143     184.935 138.449 128.324  1.00  0.00           H
ATOM   2376  HB3 ASN A 143     184.317 136.844 127.867  1.00  0.00           H
ATOM   2377 HD21 ASN A 143     186.949 137.699 129.065  1.00  0.00           H
ATOM   2378 HD22 ASN A 143     188.165 137.049 127.989  1.00  0.00           H
ATOM   2379  N   TYR A 144     182.041 137.197 126.111  1.00  0.74           N
ATOM   2380  CA  TYR A 144     180.615 137.071 126.299  1.00  0.74           C
ATOM   2381  C   TYR A 144     180.311 135.712 126.906  1.00  0.74           C
ATOM   2382  O   TYR A 144     180.268 134.685 126.230  1.00  0.74           O
ATOM   2383  CB  TYR A 144     179.915 137.297 124.939  1.00  0.74           C
ATOM   2384  CG  TYR A 144     178.468 137.603 125.138  1.00  0.74           C
ATOM   2385  CD1 TYR A 144     178.046 138.937 125.265  1.00  0.74           C
ATOM   2386  CD2 TYR A 144     177.521 136.570 125.186  1.00  0.74           C
ATOM   2387  CE1 TYR A 144     176.687 139.238 125.418  1.00  0.74           C
ATOM   2388  CE2 TYR A 144     176.160 136.873 125.280  1.00  0.74           C
ATOM   2389  CZ  TYR A 144     175.754 138.203 125.383  1.00  0.74           C
ATOM   2390  OH  TYR A 144     174.401 138.493 125.234  1.00  0.74           O
ATOM   2391  H   TYR A 144     182.549 136.454 125.653  1.00  0.00           H
ATOM   2392  HA  TYR A 144     180.285 137.844 126.993  1.00  0.00           H
ATOM   2393  HB2 TYR A 144     180.011 136.396 124.333  1.00  0.00           H
ATOM   2394  HB3 TYR A 144     180.392 138.130 124.423  1.00  0.00           H
ATOM   2395  HD1 TYR A 144     178.774 139.735 125.245  1.00  0.00           H
ATOM   2396  HD2 TYR A 144     177.844 135.540 125.150  1.00  0.00           H
ATOM   2397  HE1 TYR A 144     176.366 140.259 125.561  1.00  0.00           H
ATOM   2398  HE2 TYR A 144     175.426 136.081 125.273  1.00  0.00           H
ATOM   2399  HH  TYR A 144     173.890 137.956 125.844  1.00  0.00           H
ATOM   2400  N   ILE A 145     180.106 135.678 128.234  1.00  0.73           N
ATOM   2401  CA  ILE A 145     179.834 134.457 128.968  1.00  0.73           C
ATOM   2402  C   ILE A 145     178.586 134.725 129.785  1.00  0.73           C
ATOM   2403  O   ILE A 145     178.589 135.598 130.648  1.00  0.73           O
ATOM   2404  CB  ILE A 145     181.013 134.037 129.854  1.00  0.73           C
ATOM   2405  CG1 ILE A 145     182.295 133.848 128.996  1.00  0.73           C
ATOM   2406  CG2 ILE A 145     180.651 132.742 130.619  1.00  0.73           C
ATOM   2407  CD1 ILE A 145     183.564 133.564 129.807  1.00  0.73           C
ATOM   2408  H   ILE A 145     180.143 136.547 128.747  1.00  0.00           H
ATOM   2409  HA  ILE A 145     179.625 133.658 128.257  1.00  0.00           H
ATOM   2410  HB  ILE A 145     181.197 134.828 130.581  1.00  0.00           H
ATOM   2411 HG12 ILE A 145     182.130 133.011 128.317  1.00  0.00           H
ATOM   2412 HG13 ILE A 145     182.454 134.750 128.405  1.00  0.00           H
ATOM   2413 HG21 ILE A 145     181.490 132.445 131.248  1.00  0.00           H
ATOM   2414 HG22 ILE A 145     180.433 131.948 129.905  1.00  0.00           H
ATOM   2415 HG23 ILE A 145     179.775 132.921 131.242  1.00  0.00           H
ATOM   2416 HD11 ILE A 145     184.410 133.446 129.130  1.00  0.00           H
ATOM   2417 HD12 ILE A 145     183.755 134.396 130.485  1.00  0.00           H
ATOM   2418 HD13 ILE A 145     183.430 132.649 130.384  1.00  0.00           H
ATOM   2419  N   VAL A 146     177.472 134.020 129.496  1.00  0.70           N
ATOM   2420  CA  VAL A 146     176.200 134.277 130.157  1.00  0.70           C
ATOM   2421  C   VAL A 146     175.302 133.069 129.949  1.00  0.70           C
ATOM   2422  O   VAL A 146     175.474 132.331 128.975  1.00  0.70           O
ATOM   2423  CB  VAL A 146     175.538 135.563 129.631  1.00  0.70           C
ATOM   2424  CG1 VAL A 146     174.915 135.370 128.231  1.00  0.70           C
ATOM   2425  CG2 VAL A 146     174.511 136.124 130.635  1.00  0.70           C
ATOM   2426  H   VAL A 146     177.522 133.291 128.799  1.00  0.00           H
ATOM   2427  HA  VAL A 146     176.382 134.393 131.225  1.00  0.00           H
ATOM   2428  HB  VAL A 146     176.326 136.309 129.530  1.00  0.00           H
ATOM   2429 HG11 VAL A 146     175.667 134.973 127.549  1.00  0.00           H
ATOM   2430 HG12 VAL A 146     174.081 134.671 128.298  1.00  0.00           H
ATOM   2431 HG13 VAL A 146     174.556 136.329 127.858  1.00  0.00           H
ATOM   2432 HG21 VAL A 146     174.064 137.032 130.230  1.00  0.00           H
ATOM   2433 HG22 VAL A 146     175.011 136.354 131.576  1.00  0.00           H
ATOM   2434 HG23 VAL A 146     173.732 135.382 130.810  1.00  0.00           H
ATOM   2435  N   LEU A 147     174.328 132.828 130.852  1.00  0.63           N
ATOM   2436  CA  LEU A 147     173.349 131.758 130.777  1.00  0.63           C
ATOM   2437  C   LEU A 147     173.939 130.361 130.736  1.00  0.63           C
ATOM   2438  O   LEU A 147     173.816 129.631 129.751  1.00  0.63           O
ATOM   2439  CB  LEU A 147     172.296 131.949 129.659  1.00  0.63           C
ATOM   2440  CG  LEU A 147     171.407 133.200 129.804  1.00  0.63           C
ATOM   2441  CD1 LEU A 147     170.497 133.281 128.578  1.00  0.63           C
ATOM   2442  CD2 LEU A 147     170.557 133.203 131.084  1.00  0.63           C
ATOM   2443  H   LEU A 147     174.276 133.446 131.649  1.00  0.00           H
ATOM   2444  HA  LEU A 147     172.791 131.810 131.712  1.00  0.00           H
ATOM   2445  HB2 LEU A 147     171.647 131.073 129.653  1.00  0.00           H
ATOM   2446  HB3 LEU A 147     172.814 132.002 128.701  1.00  0.00           H
ATOM   2447  HG  LEU A 147     172.050 134.080 129.815  1.00  0.00           H
ATOM   2448 HD11 LEU A 147     169.857 134.160 128.657  1.00  0.00           H
ATOM   2449 HD12 LEU A 147     169.879 132.385 128.525  1.00  0.00           H
ATOM   2450 HD13 LEU A 147     171.106 133.356 127.677  1.00  0.00           H
ATOM   2451 HD21 LEU A 147     171.210 133.145 131.955  1.00  0.00           H
ATOM   2452 HD22 LEU A 147     169.886 132.344 131.076  1.00  0.00           H
ATOM   2453 HD23 LEU A 147     169.972 134.121 131.129  1.00  0.00           H
ATOM   2454  N   ASN A 148     174.609 129.967 131.827  1.00  0.69           N
ATOM   2455  CA  ASN A 148     175.169 128.641 131.977  1.00  0.69           C
ATOM   2456  C   ASN A 148     174.596 128.070 133.269  1.00  0.69           C
ATOM   2457  O   ASN A 148     173.393 128.157 133.506  1.00  0.69           O
ATOM   2458  CB  ASN A 148     176.718 128.664 131.940  1.00  0.69           C
ATOM   2459  CG  ASN A 148     177.214 129.174 130.587  1.00  0.69           C
ATOM   2460  OD1 ASN A 148     177.126 128.502 129.554  1.00  0.69           O
ATOM   2461  ND2 ASN A 148     177.789 130.398 130.582  1.00  0.69           N
ATOM   2462  H   ASN A 148     174.729 130.627 132.582  1.00  0.00           H
ATOM   2463  HA  ASN A 148     174.818 128.027 131.148  1.00  0.00           H
ATOM   2464  HB2 ASN A 148     177.096 127.655 132.103  1.00  0.00           H
ATOM   2465  HB3 ASN A 148     177.088 129.319 132.729  1.00  0.00           H
ATOM   2466 HD21 ASN A 148     177.861 130.926 131.440  1.00  0.00           H
ATOM   2467 HD22 ASN A 148     178.147 130.784 129.720  1.00  0.00           H
ATOM   2468  N   LYS A 149     175.406 127.436 134.142  1.00  0.66           N
ATOM   2469  CA  LYS A 149     174.902 126.960 135.421  1.00  0.66           C
ATOM   2470  C   LYS A 149     175.459 127.767 136.583  1.00  0.66           C
ATOM   2471  O   LYS A 149     174.985 127.652 137.711  1.00  0.66           O
ATOM   2472  CB  LYS A 149     175.239 125.462 135.580  1.00  0.66           C
ATOM   2473  CG  LYS A 149     174.509 124.750 136.731  1.00  0.66           C
ATOM   2474  CD  LYS A 149     174.628 123.227 136.597  1.00  0.66           C
ATOM   2475  CE  LYS A 149     173.755 122.446 137.576  1.00  0.66           C
ATOM   2476  NZ  LYS A 149     173.912 121.000 137.371  1.00  0.66           N
ATOM   2477  H   LYS A 149     176.377 127.290 133.904  1.00  0.00           H
ATOM   2478  HA  LYS A 149     173.817 127.067 135.421  1.00  0.00           H
ATOM   2479  HB2 LYS A 149     174.978 124.956 134.650  1.00  0.00           H
ATOM   2480  HB3 LYS A 149     176.313 125.364 135.738  1.00  0.00           H
ATOM   2481  HG2 LYS A 149     173.455 125.028 136.711  1.00  0.00           H
ATOM   2482  HG3 LYS A 149     174.945 125.062 137.680  1.00  0.00           H
ATOM   2483  HD2 LYS A 149     174.339 122.949 135.583  1.00  0.00           H
ATOM   2484  HD3 LYS A 149     175.669 122.943 136.754  1.00  0.00           H
ATOM   2485  HE2 LYS A 149     174.048 122.697 138.595  1.00  0.00           H
ATOM   2486  HE3 LYS A 149     172.711 122.720 137.424  1.00  0.00           H
ATOM   2487  HZ1 LYS A 149     173.301 120.502 138.003  1.00  0.00           H
ATOM   2488  HZ2 LYS A 149     173.672 120.767 136.418  1.00  0.00           H
ATOM   2489  HZ3 LYS A 149     174.870 120.737 137.551  1.00  0.00           H
ATOM   2490  N   ASP A 150     176.439 128.657 136.329  1.00  0.65           N
ATOM   2491  CA  ASP A 150     177.061 129.504 137.324  1.00  0.65           C
ATOM   2492  C   ASP A 150     176.259 130.771 137.632  1.00  0.65           C
ATOM   2493  O   ASP A 150     176.403 131.356 138.705  1.00  0.65           O
ATOM   2494  CB  ASP A 150     178.535 129.813 136.913  1.00  0.65           C
ATOM   2495  CG  ASP A 150     178.719 130.485 135.557  1.00  0.65           C
ATOM   2496  OD1 ASP A 150     177.896 130.244 134.639  1.00  0.65           O
ATOM   2497  OD2 ASP A 150     179.742 131.201 135.412  1.00  0.65           O
ATOM   2498  H   ASP A 150     176.762 128.739 135.376  1.00  0.00           H
ATOM   2499  HA  ASP A 150     177.105 128.926 138.247  1.00  0.00           H
ATOM   2500  HB2 ASP A 150     179.082 128.870 136.896  1.00  0.00           H
ATOM   2501  HB3 ASP A 150     178.978 130.453 137.676  1.00  0.00           H
ATOM   2502  N   ASP A 151     175.355 131.198 136.725  1.00  0.61           N
ATOM   2503  CA  ASP A 151     174.401 132.257 136.983  1.00  0.61           C
ATOM   2504  C   ASP A 151     173.005 131.722 137.305  1.00  0.61           C
ATOM   2505  O   ASP A 151     172.281 132.289 138.123  1.00  0.61           O
ATOM   2506  CB  ASP A 151     174.385 133.268 135.793  1.00  0.61           C
ATOM   2507  CG  ASP A 151     174.149 132.695 134.398  1.00  0.61           C
ATOM   2508  OD1 ASP A 151     174.073 131.451 134.218  1.00  0.61           O
ATOM   2509  OD2 ASP A 151     174.045 133.532 133.461  1.00  0.61           O
ATOM   2510  H   ASP A 151     175.343 130.755 135.817  1.00  0.00           H
ATOM   2511  HA  ASP A 151     174.750 132.799 137.862  1.00  0.00           H
ATOM   2512  HB2 ASP A 151     175.349 133.776 135.781  1.00  0.00           H
ATOM   2513  HB3 ASP A 151     173.612 134.011 135.990  1.00  0.00           H
ATOM   2514  N   ASN A 152     172.601 130.593 136.693  1.00  0.61           N
ATOM   2515  CA  ASN A 152     171.335 129.927 136.964  1.00  0.61           C
ATOM   2516  C   ASN A 152     171.231 129.292 138.362  1.00  0.61           C
ATOM   2517  O   ASN A 152     170.209 129.399 139.037  1.00  0.61           O
ATOM   2518  CB  ASN A 152     171.104 128.857 135.862  1.00  0.61           C
ATOM   2519  CG  ASN A 152     169.643 128.434 135.750  1.00  0.61           C
ATOM   2520  OD1 ASN A 152     168.706 129.136 136.126  1.00  0.61           O
ATOM   2521  ND2 ASN A 152     169.425 127.230 135.173  1.00  0.61           N
ATOM   2522  H   ASN A 152     173.214 130.183 136.003  1.00  0.00           H
ATOM   2523  HA  ASN A 152     170.543 130.671 136.877  1.00  0.00           H
ATOM   2524  HB2 ASN A 152     171.704 127.978 136.098  1.00  0.00           H
ATOM   2525  HB3 ASN A 152     171.430 129.261 134.903  1.00  0.00           H
ATOM   2526 HD21 ASN A 152     170.206 126.671 134.860  1.00  0.00           H
ATOM   2527 HD22 ASN A 152     168.481 126.890 135.055  1.00  0.00           H
ATOM   2528  N   GLU A 153     172.297 128.609 138.827  1.00  0.55           N
ATOM   2529  CA  GLU A 153     172.287 127.833 140.056  1.00  0.55           C
ATOM   2530  C   GLU A 153     173.548 128.102 140.861  1.00  0.55           C
ATOM   2531  O   GLU A 153     174.422 128.881 140.498  1.00  0.55           O
ATOM   2532  CB  GLU A 153     172.213 126.297 139.826  1.00  0.55           C
ATOM   2533  CG  GLU A 153     170.898 125.754 139.222  1.00  0.55           C
ATOM   2534  CD  GLU A 153     170.914 124.226 139.156  1.00  0.55           C
ATOM   2535  OE1 GLU A 153     171.899 123.602 139.640  1.00  0.55           O
ATOM   2536  OE2 GLU A 153     169.944 123.659 138.600  1.00  0.55           O
ATOM   2537  H   GLU A 153     173.152 128.638 138.290  1.00  0.00           H
ATOM   2538  HA  GLU A 153     171.425 128.136 140.650  1.00  0.00           H
ATOM   2539  HB2 GLU A 153     172.361 125.810 140.790  1.00  0.00           H
ATOM   2540  HB3 GLU A 153     173.034 126.010 139.169  1.00  0.00           H
ATOM   2541  HG2 GLU A 153     170.062 126.075 139.843  1.00  0.00           H
ATOM   2542  HG3 GLU A 153     170.773 126.155 138.216  1.00  0.00           H
ATOM   2543  N   GLU A 154     173.650 127.449 142.027  1.00  0.57           N
ATOM   2544  CA  GLU A 154     174.723 127.569 142.984  1.00  0.57           C
ATOM   2545  C   GLU A 154     175.551 126.286 143.023  1.00  0.57           C
ATOM   2546  O   GLU A 154     175.763 125.657 144.059  1.00  0.57           O
ATOM   2547  CB  GLU A 154     174.083 127.936 144.347  1.00  0.57           C
ATOM   2548  CG  GLU A 154     172.901 127.028 144.794  1.00  0.57           C
ATOM   2549  CD  GLU A 154     171.933 127.707 145.763  1.00  0.57           C
ATOM   2550  OE1 GLU A 154     172.051 128.931 146.010  1.00  0.57           O
ATOM   2551  OE2 GLU A 154     170.990 126.994 146.197  1.00  0.57           O
ATOM   2552  H   GLU A 154     172.903 126.810 142.258  1.00  0.00           H
ATOM   2553  HA  GLU A 154     175.371 128.389 142.675  1.00  0.00           H
ATOM   2554  HB2 GLU A 154     173.714 128.960 144.281  1.00  0.00           H
ATOM   2555  HB3 GLU A 154     174.857 127.897 145.113  1.00  0.00           H
ATOM   2556  HG2 GLU A 154     173.312 126.144 145.282  1.00  0.00           H
ATOM   2557  HG3 GLU A 154     172.347 126.713 143.909  1.00  0.00           H
ATOM   2558  N   CYS A 155     176.068 125.836 141.852  1.00  0.59           N
ATOM   2559  CA  CYS A 155     176.964 124.687 141.793  1.00  0.59           C
ATOM   2560  C   CYS A 155     178.291 124.886 142.526  1.00  0.59           C
ATOM   2561  O   CYS A 155     178.877 125.963 142.549  1.00  0.59           O
ATOM   2562  CB  CYS A 155     177.195 124.121 140.362  1.00  0.59           C
ATOM   2563  SG  CYS A 155     177.832 125.309 139.137  1.00  0.59           S
ATOM   2564  H   CYS A 155     175.825 126.312 140.995  1.00  0.00           H
ATOM   2565  HA  CYS A 155     176.451 123.894 142.337  1.00  0.00           H
ATOM   2566  HB2 CYS A 155     176.242 123.740 139.995  1.00  0.00           H
ATOM   2567  HB3 CYS A 155     177.895 123.289 140.430  1.00  0.00           H
ATOM   2568  HG  CYS A 155     177.002 126.352 139.054  1.00  0.00           H
ATOM   2569  N   GLY A 156     178.780 123.818 143.190  1.00  0.64           N
ATOM   2570  CA  GLY A 156     179.961 123.893 144.038  1.00  0.64           C
ATOM   2571  C   GLY A 156     181.247 123.621 143.318  1.00  0.64           C
ATOM   2572  O   GLY A 156     181.611 122.466 143.111  1.00  0.64           O
ATOM   2573  H   GLY A 156     178.307 122.930 143.095  1.00  0.00           H
ATOM   2574  HA2 GLY A 156     180.013 124.894 144.465  1.00  0.00           H
ATOM   2575  HA3 GLY A 156     179.855 123.172 144.849  1.00  0.00           H
ATOM   2576  N   ASP A 157     181.995 124.677 142.964  1.00  0.66           N
ATOM   2577  CA  ASP A 157     183.355 124.563 142.480  1.00  0.66           C
ATOM   2578  C   ASP A 157     184.305 124.258 143.649  1.00  0.66           C
ATOM   2579  O   ASP A 157     184.376 125.005 144.626  1.00  0.66           O
ATOM   2580  CB  ASP A 157     183.799 125.870 141.764  1.00  0.66           C
ATOM   2581  CG  ASP A 157     183.020 126.166 140.485  1.00  0.66           C
ATOM   2582  OD1 ASP A 157     182.525 125.225 139.816  1.00  0.66           O
ATOM   2583  OD2 ASP A 157     182.954 127.370 140.123  1.00  0.66           O
ATOM   2584  H   ASP A 157     181.589 125.599 143.039  1.00  0.00           H
ATOM   2585  HA  ASP A 157     183.404 123.740 141.767  1.00  0.00           H
ATOM   2586  HB2 ASP A 157     184.855 125.781 141.510  1.00  0.00           H
ATOM   2587  HB3 ASP A 157     183.673 126.706 142.452  1.00  0.00           H
ATOM   2588  N   ILE A 158     185.064 123.140 143.593  1.00  0.64           N
ATOM   2589  CA  ILE A 158     186.022 122.784 144.637  1.00  0.64           C
ATOM   2590  C   ILE A 158     187.419 122.757 144.054  1.00  0.64           C
ATOM   2591  O   ILE A 158     187.712 122.144 143.029  1.00  0.64           O
ATOM   2592  CB  ILE A 158     185.722 121.500 145.426  1.00  0.64           C
ATOM   2593  CG1 ILE A 158     185.463 120.242 144.564  1.00  0.64           C
ATOM   2594  CG2 ILE A 158     184.514 121.770 146.350  1.00  0.64           C
ATOM   2595  CD1 ILE A 158     186.679 119.316 144.444  1.00  0.64           C
ATOM   2596  H   ILE A 158     184.964 122.526 142.797  1.00  0.00           H
ATOM   2597  HA  ILE A 158     186.006 123.600 145.360  1.00  0.00           H
ATOM   2598  HB  ILE A 158     186.584 121.294 146.061  1.00  0.00           H
ATOM   2599 HG12 ILE A 158     185.176 120.564 143.563  1.00  0.00           H
ATOM   2600 HG13 ILE A 158     184.637 119.681 145.002  1.00  0.00           H
ATOM   2601 HG21 ILE A 158     184.284 120.870 146.920  1.00  0.00           H
ATOM   2602 HG22 ILE A 158     184.756 122.582 147.036  1.00  0.00           H
ATOM   2603 HG23 ILE A 158     183.650 122.049 145.747  1.00  0.00           H
ATOM   2604 HD11 ILE A 158     186.422 118.456 143.825  1.00  0.00           H
ATOM   2605 HD12 ILE A 158     186.974 118.974 145.436  1.00  0.00           H
ATOM   2606 HD13 ILE A 158     187.505 119.859 143.986  1.00  0.00           H
ATOM   2607  N   CYS A 159     188.343 123.484 144.700  1.00  0.68           N
ATOM   2608  CA  CYS A 159     189.687 123.661 144.200  1.00  0.68           C
ATOM   2609  C   CYS A 159     190.645 122.626 144.768  1.00  0.68           C
ATOM   2610  O   CYS A 159     190.391 122.060 145.834  1.00  0.68           O
ATOM   2611  CB  CYS A 159     190.242 125.043 144.593  1.00  0.68           C
ATOM   2612  SG  CYS A 159     189.212 126.413 144.001  1.00  0.68           S
ATOM   2613  H   CYS A 159     188.089 123.926 145.572  1.00  0.00           H
ATOM   2614  HA  CYS A 159     189.676 123.578 143.113  1.00  0.00           H
ATOM   2615  HB2 CYS A 159     190.301 125.097 145.680  1.00  0.00           H
ATOM   2616  HB3 CYS A 159     191.245 125.151 144.179  1.00  0.00           H
ATOM   2617  HG  CYS A 159     189.866 127.081 143.047  1.00  0.00           H
ATOM   2618  N   PRO A 160     191.782 122.368 144.133  1.00  0.64           N
ATOM   2619  CA  PRO A 160     192.824 121.528 144.721  1.00  0.64           C
ATOM   2620  C   PRO A 160     193.551 122.018 145.968  1.00  0.64           C
ATOM   2621  O   PRO A 160     194.635 121.505 146.222  1.00  0.64           O
ATOM   2622  CB  PRO A 160     193.818 121.367 143.561  1.00  0.64           C
ATOM   2623  CG  PRO A 160     192.931 121.351 142.322  1.00  0.64           C
ATOM   2624  CD  PRO A 160     191.853 122.372 142.665  1.00  0.64           C
ATOM   2625  HA  PRO A 160     192.393 120.551 144.939  1.00  0.00           H
ATOM   2626  HB2 PRO A 160     194.515 122.204 143.528  1.00  0.00           H
ATOM   2627  HB3 PRO A 160     194.359 120.425 143.653  1.00  0.00           H
ATOM   2628  HG2 PRO A 160     192.499 120.363 142.161  1.00  0.00           H
ATOM   2629  HG3 PRO A 160     193.494 121.669 141.445  1.00  0.00           H
ATOM   2630  HD2 PRO A 160     190.896 122.078 142.234  1.00  0.00           H
ATOM   2631  HD3 PRO A 160     192.141 123.359 142.305  1.00  0.00           H
ATOM   2632  N   GLY A 161     192.962 122.919 146.785  1.00  0.60           N
ATOM   2633  CA  GLY A 161     193.577 123.569 147.940  1.00  0.60           C
ATOM   2634  C   GLY A 161     194.253 122.694 148.966  1.00  0.60           C
ATOM   2635  O   GLY A 161     195.434 122.866 149.250  1.00  0.60           O
ATOM   2636  H   GLY A 161     192.005 123.167 146.577  1.00  0.00           H
ATOM   2637  HA2 GLY A 161     192.794 124.126 148.454  1.00  0.00           H
ATOM   2638  HA3 GLY A 161     194.312 124.285 147.572  1.00  0.00           H
ATOM   2639  N   THR A 162     193.509 121.749 149.574  1.00  0.51           N
ATOM   2640  CA  THR A 162     194.086 120.768 150.504  1.00  0.51           C
ATOM   2641  C   THR A 162     193.432 119.408 150.366  1.00  0.51           C
ATOM   2642  O   THR A 162     194.081 118.371 150.480  1.00  0.51           O
ATOM   2643  CB  THR A 162     193.915 121.142 151.984  1.00  0.51           C
ATOM   2644  OG1 THR A 162     192.566 121.482 152.291  1.00  0.51           O
ATOM   2645  CG2 THR A 162     194.770 122.366 152.333  1.00  0.51           C
ATOM   2646  H   THR A 162     192.518 121.714 149.383  1.00  0.00           H
ATOM   2647  HA  THR A 162     195.150 120.667 150.290  1.00  0.00           H
ATOM   2648  HB  THR A 162     194.223 120.301 152.605  1.00  0.00           H
ATOM   2649  HG1 THR A 162     191.994 120.739 152.086  1.00  0.00           H
ATOM   2650 HG21 THR A 162     194.636 122.616 153.385  1.00  0.00           H
ATOM   2651 HG22 THR A 162     195.820 122.141 152.144  1.00  0.00           H
ATOM   2652 HG23 THR A 162     194.463 123.211 151.717  1.00  0.00           H
ATOM   2653  N   ALA A 163     192.127 119.363 150.023  1.00  0.47           N
ATOM   2654  CA  ALA A 163     191.323 118.153 150.020  1.00  0.47           C
ATOM   2655  C   ALA A 163     191.604 117.234 148.839  1.00  0.47           C
ATOM   2656  O   ALA A 163     191.139 116.099 148.766  1.00  0.47           O
ATOM   2657  CB  ALA A 163     189.832 118.548 150.024  1.00  0.47           C
ATOM   2658  H   ALA A 163     191.680 120.227 149.751  1.00  0.00           H
ATOM   2659  HA  ALA A 163     191.532 117.603 150.937  1.00  0.00           H
ATOM   2660  HB1 ALA A 163     189.217 117.648 150.022  1.00  0.00           H
ATOM   2661  HB2 ALA A 163     189.611 119.141 149.136  1.00  0.00           H
ATOM   2662  HB3 ALA A 163     189.614 119.135 150.916  1.00  0.00           H
ATOM   2663  N   LYS A 164     192.378 117.719 147.857  1.00  0.50           N
ATOM   2664  CA  LYS A 164     192.734 116.948 146.688  1.00  0.50           C
ATOM   2665  C   LYS A 164     194.165 116.460 146.725  1.00  0.50           C
ATOM   2666  O   LYS A 164     194.606 115.835 145.753  1.00  0.50           O
ATOM   2667  CB  LYS A 164     192.557 117.811 145.420  1.00  0.50           C
ATOM   2668  CG  LYS A 164     191.125 118.335 145.214  1.00  0.50           C
ATOM   2669  CD  LYS A 164     190.021 117.268 145.149  1.00  0.50           C
ATOM   2670  CE  LYS A 164     190.222 116.230 144.045  1.00  0.50           C
ATOM   2671  NZ  LYS A 164     189.050 115.330 144.005  1.00  0.50           N
ATOM   2672  H   LYS A 164     192.727 118.663 147.938  1.00  0.00           H
ATOM   2673  HA  LYS A 164     192.071 116.086 146.621  1.00  0.00           H
ATOM   2674  HB2 LYS A 164     193.228 118.667 145.492  1.00  0.00           H
ATOM   2675  HB3 LYS A 164     192.840 117.217 144.551  1.00  0.00           H
ATOM   2676  HG2 LYS A 164     191.105 118.893 144.278  1.00  0.00           H
ATOM   2677  HG3 LYS A 164     190.891 119.022 146.027  1.00  0.00           H
ATOM   2678  HD2 LYS A 164     189.991 116.748 146.106  1.00  0.00           H
ATOM   2679  HD3 LYS A 164     189.064 117.765 144.991  1.00  0.00           H
ATOM   2680  HE2 LYS A 164     191.121 115.649 144.250  1.00  0.00           H
ATOM   2681  HE3 LYS A 164     190.326 116.735 143.085  1.00  0.00           H
ATOM   2682  HZ1 LYS A 164     189.178 114.642 143.277  1.00  0.00           H
ATOM   2683  HZ2 LYS A 164     188.218 115.870 143.815  1.00  0.00           H
ATOM   2684  HZ3 LYS A 164     188.953 114.864 144.896  1.00  0.00           H
ATOM   2685  N   GLY A 165     194.902 116.738 147.828  1.00  0.49           N
ATOM   2686  CA  GLY A 165     196.295 116.333 148.014  1.00  0.49           C
ATOM   2687  C   GLY A 165     197.281 116.982 147.075  1.00  0.49           C
ATOM   2688  O   GLY A 165     198.218 116.338 146.614  1.00  0.49           O
ATOM   2689  H   GLY A 165     194.460 117.260 148.571  1.00  0.00           H
ATOM   2690  HA2 GLY A 165     196.586 116.583 149.034  1.00  0.00           H
ATOM   2691  HA3 GLY A 165     196.360 115.252 147.891  1.00  0.00           H
ATOM   2692  N   LYS A 166     197.071 118.263 146.726  1.00  0.38           N
ATOM   2693  CA  LYS A 166     197.852 118.957 145.721  1.00  0.38           C
ATOM   2694  C   LYS A 166     198.203 120.341 146.215  1.00  0.38           C
ATOM   2695  O   LYS A 166     197.785 120.771 147.286  1.00  0.38           O
ATOM   2696  CB  LYS A 166     197.093 119.105 144.374  1.00  0.38           C
ATOM   2697  CG  LYS A 166     196.647 117.757 143.799  1.00  0.38           C
ATOM   2698  CD  LYS A 166     195.999 117.871 142.414  1.00  0.38           C
ATOM   2699  CE  LYS A 166     195.565 116.521 141.844  1.00  0.38           C
ATOM   2700  NZ  LYS A 166     194.565 115.907 142.743  1.00  0.38           N
ATOM   2701  H   LYS A 166     196.329 118.769 147.189  1.00  0.00           H
ATOM   2702  HA  LYS A 166     198.774 118.402 145.546  1.00  0.00           H
ATOM   2703  HB2 LYS A 166     197.751 119.591 143.654  1.00  0.00           H
ATOM   2704  HB3 LYS A 166     196.215 119.731 144.530  1.00  0.00           H
ATOM   2705  HG2 LYS A 166     195.924 117.312 144.483  1.00  0.00           H
ATOM   2706  HG3 LYS A 166     197.515 117.101 143.728  1.00  0.00           H
ATOM   2707  HD2 LYS A 166     195.121 118.513 142.493  1.00  0.00           H
ATOM   2708  HD3 LYS A 166     196.711 118.331 141.728  1.00  0.00           H
ATOM   2709  HE2 LYS A 166     196.432 115.865 141.763  1.00  0.00           H
ATOM   2710  HE3 LYS A 166     195.126 116.667 140.857  1.00  0.00           H
ATOM   2711  HZ1 LYS A 166     193.641 116.218 142.481  1.00  0.00           H
ATOM   2712  HZ2 LYS A 166     194.755 116.182 143.696  1.00  0.00           H
ATOM   2713  HZ3 LYS A 166     194.616 114.901 142.666  1.00  0.00           H
ATOM   2714  N   THR A 167     199.024 121.059 145.428  1.00  0.50           N
ATOM   2715  CA  THR A 167     199.354 122.465 145.609  1.00  0.50           C
ATOM   2716  C   THR A 167     198.133 123.363 145.621  1.00  0.50           C
ATOM   2717  O   THR A 167     197.283 123.283 144.737  1.00  0.50           O
ATOM   2718  CB  THR A 167     200.253 122.965 144.480  1.00  0.50           C
ATOM   2719  OG1 THR A 167     201.364 122.094 144.332  1.00  0.50           O
ATOM   2720  CG2 THR A 167     200.828 124.360 144.761  1.00  0.50           C
ATOM   2721  H   THR A 167     199.448 120.582 144.645  1.00  0.00           H
ATOM   2722  HA  THR A 167     199.883 122.581 146.555  1.00  0.00           H
ATOM   2723  HB  THR A 167     199.686 122.989 143.550  1.00  0.00           H
ATOM   2724 HG21 THR A 167     201.459 124.668 143.928  1.00  0.00           H
ATOM   2725 HG22 THR A 167     200.011 125.072 144.880  1.00  0.00           H
ATOM   2726 HG23 THR A 167     201.421 124.331 145.675  1.00  0.00           H
ATOM   2727  HG1 THR A 167     201.052 121.204 144.154  1.00  0.00           H
ATOM   2728  N   ASN A 168     198.044 124.275 146.615  1.00  0.69           N
ATOM   2729  CA  ASN A 168     197.025 125.305 146.694  1.00  0.69           C
ATOM   2730  C   ASN A 168     197.040 126.219 145.466  1.00  0.69           C
ATOM   2731  O   ASN A 168     198.090 126.652 144.991  1.00  0.69           O
ATOM   2732  CB  ASN A 168     197.212 126.085 148.030  1.00  0.69           C
ATOM   2733  CG  ASN A 168     196.162 127.169 148.281  1.00  0.69           C
ATOM   2734  OD1 ASN A 168     196.474 128.354 148.186  1.00  0.69           O
ATOM   2735  ND2 ASN A 168     194.924 126.758 148.624  1.00  0.69           N
ATOM   2736  H   ASN A 168     198.733 124.237 147.352  1.00  0.00           H
ATOM   2737  HA  ASN A 168     196.054 124.811 146.730  1.00  0.00           H
ATOM   2738  HB2 ASN A 168     198.194 126.559 148.014  1.00  0.00           H
ATOM   2739  HB3 ASN A 168     197.182 125.374 148.855  1.00  0.00           H
ATOM   2740 HD21 ASN A 168     194.722 125.771 148.697  1.00  0.00           H
ATOM   2741 HD22 ASN A 168     194.199 127.437 148.808  1.00  0.00           H
ATOM   2742  N   CYS A 169     195.854 126.480 144.886  1.00  0.75           N
ATOM   2743  CA  CYS A 169     195.738 127.243 143.661  1.00  0.75           C
ATOM   2744  C   CYS A 169     196.068 128.724 143.832  1.00  0.75           C
ATOM   2745  O   CYS A 169     195.785 129.295 144.883  1.00  0.75           O
ATOM   2746  CB  CYS A 169     194.328 127.110 143.039  1.00  0.75           C
ATOM   2747  SG  CYS A 169     193.860 125.426 142.517  1.00  0.75           S
ATOM   2748  H   CYS A 169     195.013 126.130 145.322  1.00  0.00           H
ATOM   2749  HA  CYS A 169     196.451 126.829 142.948  1.00  0.00           H
ATOM   2750  HB2 CYS A 169     193.601 127.447 143.778  1.00  0.00           H
ATOM   2751  HB3 CYS A 169     194.270 127.769 142.172  1.00  0.00           H
ATOM   2752  HG  CYS A 169     193.551 125.432 141.217  1.00  0.00           H
ATOM   2753  N   PRO A 170     196.645 129.421 142.852  1.00  0.79           N
ATOM   2754  CA  PRO A 170     196.961 130.833 142.999  1.00  0.79           C
ATOM   2755  C   PRO A 170     195.699 131.673 143.067  1.00  0.79           C
ATOM   2756  O   PRO A 170     194.693 131.345 142.436  1.00  0.79           O
ATOM   2757  CB  PRO A 170     197.798 131.158 141.751  1.00  0.79           C
ATOM   2758  CG  PRO A 170     197.283 130.170 140.703  1.00  0.79           C
ATOM   2759  CD  PRO A 170     197.008 128.913 141.527  1.00  0.79           C
ATOM   2760  HA  PRO A 170     197.559 130.988 143.897  1.00  0.00           H
ATOM   2761  HB2 PRO A 170     197.634 132.186 141.430  1.00  0.00           H
ATOM   2762  HB3 PRO A 170     198.856 130.986 141.948  1.00  0.00           H
ATOM   2763  HG2 PRO A 170     196.371 130.538 140.232  1.00  0.00           H
ATOM   2764  HG3 PRO A 170     198.049 129.975 139.952  1.00  0.00           H
ATOM   2765  HD2 PRO A 170     197.898 128.287 141.584  1.00  0.00           H
ATOM   2766  HD3 PRO A 170     196.178 128.352 141.096  1.00  0.00           H
ATOM   2767  N   ALA A 171     195.736 132.758 143.855  1.00  0.73           N
ATOM   2768  CA  ALA A 171     194.593 133.595 144.103  1.00  0.73           C
ATOM   2769  C   ALA A 171     194.830 134.972 143.515  1.00  0.73           C
ATOM   2770  O   ALA A 171     195.789 135.663 143.854  1.00  0.73           O
ATOM   2771  CB  ALA A 171     194.365 133.717 145.621  1.00  0.73           C
ATOM   2772  H   ALA A 171     196.612 133.000 144.297  1.00  0.00           H
ATOM   2773  HA  ALA A 171     193.712 133.151 143.640  1.00  0.00           H
ATOM   2774  HB1 ALA A 171     193.499 134.351 145.809  1.00  0.00           H
ATOM   2775  HB2 ALA A 171     194.189 132.727 146.042  1.00  0.00           H
ATOM   2776  HB3 ALA A 171     195.246 134.158 146.086  1.00  0.00           H
ATOM   2777  N   THR A 172     193.947 135.407 142.598  1.00  0.67           N
ATOM   2778  CA  THR A 172     194.035 136.714 141.951  1.00  0.67           C
ATOM   2779  C   THR A 172     192.768 137.489 142.220  1.00  0.67           C
ATOM   2780  O   THR A 172     191.664 136.948 142.198  1.00  0.67           O
ATOM   2781  CB  THR A 172     194.294 136.706 140.434  1.00  0.67           C
ATOM   2782  OG1 THR A 172     193.352 135.944 139.688  1.00  0.67           O
ATOM   2783  CG2 THR A 172     195.664 136.076 140.157  1.00  0.67           C
ATOM   2784  H   THR A 172     193.183 134.798 142.343  1.00  0.00           H
ATOM   2785  HA  THR A 172     194.856 137.256 142.420  1.00  0.00           H
ATOM   2786  HB  THR A 172     194.293 137.732 140.067  1.00  0.00           H
ATOM   2787  HG1 THR A 172     193.722 135.729 138.829  1.00  0.00           H
ATOM   2788 HG21 THR A 172     195.851 136.069 139.083  1.00  0.00           H
ATOM   2789 HG22 THR A 172     196.439 136.658 140.656  1.00  0.00           H
ATOM   2790 HG23 THR A 172     195.677 135.054 140.535  1.00  0.00           H
ATOM   2791  N   VAL A 173     192.885 138.800 142.519  1.00  0.56           N
ATOM   2792  CA  VAL A 173     191.739 139.688 142.616  1.00  0.56           C
ATOM   2793  C   VAL A 173     191.120 139.948 141.244  1.00  0.56           C
ATOM   2794  O   VAL A 173     191.817 140.215 140.271  1.00  0.56           O
ATOM   2795  CB  VAL A 173     192.072 140.975 143.375  1.00  0.56           C
ATOM   2796  CG1 VAL A 173     193.132 141.829 142.652  1.00  0.56           C
ATOM   2797  CG2 VAL A 173     190.798 141.798 143.652  1.00  0.56           C
ATOM   2798  H   VAL A 173     193.807 139.179 142.682  1.00  0.00           H
ATOM   2799  HA  VAL A 173     190.986 139.164 143.205  1.00  0.00           H
ATOM   2800  HB  VAL A 173     192.489 140.686 144.340  1.00  0.00           H
ATOM   2801 HG21 VAL A 173     191.062 142.707 144.192  1.00  0.00           H
ATOM   2802 HG22 VAL A 173     190.324 142.062 142.707  1.00  0.00           H
ATOM   2803 HG23 VAL A 173     190.107 141.207 144.252  1.00  0.00           H
ATOM   2804 HG11 VAL A 173     194.021 141.226 142.468  1.00  0.00           H
ATOM   2805 HG12 VAL A 173     193.396 142.684 143.274  1.00  0.00           H
ATOM   2806 HG13 VAL A 173     192.729 142.181 141.703  1.00  0.00           H
ATOM   2807  N   ILE A 174     189.781 139.828 141.122  1.00  0.56           N
ATOM   2808  CA  ILE A 174     189.083 140.069 139.859  1.00  0.56           C
ATOM   2809  C   ILE A 174     188.190 141.289 139.930  1.00  0.56           C
ATOM   2810  O   ILE A 174     188.111 142.063 138.983  1.00  0.56           O
ATOM   2811  CB  ILE A 174     188.279 138.844 139.396  1.00  0.56           C
ATOM   2812  CG1 ILE A 174     187.309 139.160 138.228  1.00  0.56           C
ATOM   2813  CG2 ILE A 174     187.574 138.137 140.581  1.00  0.56           C
ATOM   2814  CD1 ILE A 174     186.763 137.920 137.514  1.00  0.56           C
ATOM   2815  H   ILE A 174     189.241 139.562 141.933  1.00  0.00           H
ATOM   2816  HA  ILE A 174     189.841 140.265 139.101  1.00  0.00           H
ATOM   2817  HB  ILE A 174     189.006 138.132 139.005  1.00  0.00           H
ATOM   2818 HG12 ILE A 174     187.841 139.769 137.497  1.00  0.00           H
ATOM   2819 HG13 ILE A 174     186.470 139.736 138.618  1.00  0.00           H
ATOM   2820 HD11 ILE A 174     186.093 138.228 136.711  1.00  0.00           H
ATOM   2821 HD12 ILE A 174     186.216 137.302 138.226  1.00  0.00           H
ATOM   2822 HD13 ILE A 174     187.591 137.347 137.097  1.00  0.00           H
ATOM   2823 HG21 ILE A 174     186.752 137.528 140.205  1.00  0.00           H
ATOM   2824 HG22 ILE A 174     188.289 137.499 141.101  1.00  0.00           H
ATOM   2825 HG23 ILE A 174     187.186 138.886 141.272  1.00  0.00           H
ATOM   2826  N   ASN A 175     187.511 141.536 141.065  1.00  0.45           N
ATOM   2827  CA  ASN A 175     186.641 142.692 141.172  1.00  0.45           C
ATOM   2828  C   ASN A 175     186.878 143.384 142.499  1.00  0.45           C
ATOM   2829  O   ASN A 175     187.349 144.514 142.531  1.00  0.45           O
ATOM   2830  CB  ASN A 175     185.158 142.264 140.980  1.00  0.45           C
ATOM   2831  CG  ASN A 175     184.177 143.404 140.688  1.00  0.45           C
ATOM   2832  OD1 ASN A 175     182.976 143.153 140.603  1.00  0.45           O
ATOM   2833  ND2 ASN A 175     184.650 144.658 140.526  1.00  0.45           N
ATOM   2834  H   ASN A 175     187.608 140.910 141.851  1.00  0.00           H
ATOM   2835  HA  ASN A 175     186.900 143.388 140.374  1.00  0.00           H
ATOM   2836  HB2 ASN A 175     185.116 141.563 140.147  1.00  0.00           H
ATOM   2837  HB3 ASN A 175     184.829 141.748 141.882  1.00  0.00           H
ATOM   2838 HD21 ASN A 175     185.641 144.837 140.599  1.00  0.00           H
ATOM   2839 HD22 ASN A 175     184.013 145.417 140.332  1.00  0.00           H
ATOM   2840  N   GLY A 176     186.574 142.721 143.631  1.00  0.56           N
ATOM   2841  CA  GLY A 176     186.841 143.302 144.944  1.00  0.56           C
ATOM   2842  C   GLY A 176     187.197 142.271 145.972  1.00  0.56           C
ATOM   2843  O   GLY A 176     187.134 142.527 147.167  1.00  0.56           O
ATOM   2844  H   GLY A 176     186.153 141.805 143.571  1.00  0.00           H
ATOM   2845  HA2 GLY A 176     185.950 143.833 145.278  1.00  0.00           H
ATOM   2846  HA3 GLY A 176     187.663 144.012 144.856  1.00  0.00           H
ATOM   2847  N   GLN A 177     187.585 141.062 145.535  1.00  0.41           N
ATOM   2848  CA  GLN A 177     187.942 139.993 146.438  1.00  0.41           C
ATOM   2849  C   GLN A 177     188.863 139.038 145.710  1.00  0.41           C
ATOM   2850  O   GLN A 177     188.865 138.976 144.477  1.00  0.41           O
ATOM   2851  CB  GLN A 177     186.703 139.224 146.972  1.00  0.41           C
ATOM   2852  CG  GLN A 177     185.862 138.503 145.888  1.00  0.41           C
ATOM   2853  CD  GLN A 177     184.630 137.839 146.503  1.00  0.41           C
ATOM   2854  OE1 GLN A 177     184.351 137.938 147.696  1.00  0.41           O
ATOM   2855  NE2 GLN A 177     183.844 137.135 145.657  1.00  0.41           N
ATOM   2856  H   GLN A 177     187.629 140.894 144.540  1.00  0.00           H
ATOM   2857  HA  GLN A 177     188.480 140.418 147.285  1.00  0.00           H
ATOM   2858  HB2 GLN A 177     186.056 139.938 147.482  1.00  0.00           H
ATOM   2859  HB3 GLN A 177     187.041 138.484 147.697  1.00  0.00           H
ATOM   2860  HG2 GLN A 177     185.540 139.231 145.144  1.00  0.00           H
ATOM   2861  HG3 GLN A 177     186.476 137.743 145.404  1.00  0.00           H
ATOM   2862 HE21 GLN A 177     184.088 137.068 144.679  1.00  0.00           H
ATOM   2863 HE22 GLN A 177     183.013 136.676 146.003  1.00  0.00           H
ATOM   2864  N   PHE A 178     189.673 138.281 146.472  1.00  0.48           N
ATOM   2865  CA  PHE A 178     190.558 137.254 145.962  1.00  0.48           C
ATOM   2866  C   PHE A 178     189.812 135.936 145.895  1.00  0.48           C
ATOM   2867  O   PHE A 178     189.051 135.597 146.797  1.00  0.48           O
ATOM   2868  CB  PHE A 178     191.781 137.037 146.894  1.00  0.48           C
ATOM   2869  CG  PHE A 178     192.715 138.209 146.837  1.00  0.48           C
ATOM   2870  CD1 PHE A 178     193.702 138.269 145.841  1.00  0.48           C
ATOM   2871  CD2 PHE A 178     192.643 139.240 147.788  1.00  0.48           C
ATOM   2872  CE1 PHE A 178     194.591 139.350 145.781  1.00  0.48           C
ATOM   2873  CE2 PHE A 178     193.529 140.324 147.732  1.00  0.48           C
ATOM   2874  CZ  PHE A 178     194.500 140.381 146.725  1.00  0.48           C
ATOM   2875  H   PHE A 178     189.663 138.440 147.469  1.00  0.00           H
ATOM   2876  HA  PHE A 178     190.902 137.530 144.965  1.00  0.00           H
ATOM   2877  HB2 PHE A 178     192.315 136.140 146.579  1.00  0.00           H
ATOM   2878  HB3 PHE A 178     191.433 136.905 147.918  1.00  0.00           H
ATOM   2879  HD1 PHE A 178     193.777 137.474 145.114  1.00  0.00           H
ATOM   2880  HD2 PHE A 178     191.898 139.197 148.569  1.00  0.00           H
ATOM   2881  HE1 PHE A 178     195.345 139.388 145.009  1.00  0.00           H
ATOM   2882  HE2 PHE A 178     193.463 141.115 148.465  1.00  0.00           H
ATOM   2883  HZ  PHE A 178     195.179 141.220 146.676  1.00  0.00           H
ATOM   2884  N   VAL A 179     190.026 135.157 144.820  1.00  0.64           N
ATOM   2885  CA  VAL A 179     189.429 133.843 144.664  1.00  0.64           C
ATOM   2886  C   VAL A 179     190.481 132.931 144.055  1.00  0.64           C
ATOM   2887  O   VAL A 179     191.315 133.366 143.259  1.00  0.64           O
ATOM   2888  CB  VAL A 179     188.162 133.826 143.796  1.00  0.64           C
ATOM   2889  CG1 VAL A 179     187.016 134.563 144.517  1.00  0.64           C
ATOM   2890  CG2 VAL A 179     188.413 134.464 142.415  1.00  0.64           C
ATOM   2891  H   VAL A 179     190.630 135.502 144.088  1.00  0.00           H
ATOM   2892  HA  VAL A 179     189.174 133.462 145.653  1.00  0.00           H
ATOM   2893  HB  VAL A 179     187.862 132.789 143.646  1.00  0.00           H
ATOM   2894 HG11 VAL A 179     186.122 134.545 143.893  1.00  0.00           H
ATOM   2895 HG12 VAL A 179     187.309 135.596 144.702  1.00  0.00           H
ATOM   2896 HG13 VAL A 179     186.807 134.069 145.466  1.00  0.00           H
ATOM   2897 HG21 VAL A 179     189.224 133.937 141.913  1.00  0.00           H
ATOM   2898 HG22 VAL A 179     188.685 135.512 142.543  1.00  0.00           H
ATOM   2899 HG23 VAL A 179     187.507 134.395 141.813  1.00  0.00           H
ATOM   2900  N   GLU A 180     190.495 131.643 144.460  1.00  0.68           N
ATOM   2901  CA  GLU A 180     191.357 130.609 143.911  1.00  0.68           C
ATOM   2902  C   GLU A 180     191.041 130.267 142.458  1.00  0.68           C
ATOM   2903  O   GLU A 180     189.907 130.399 141.996  1.00  0.68           O
ATOM   2904  CB  GLU A 180     191.307 129.316 144.755  1.00  0.68           C
ATOM   2905  CG  GLU A 180     191.966 129.432 146.153  1.00  0.68           C
ATOM   2906  CD  GLU A 180     192.120 128.074 146.843  1.00  0.68           C
ATOM   2907  OE1 GLU A 180     191.857 127.033 146.187  1.00  0.68           O
ATOM   2908  OE2 GLU A 180     192.518 128.056 148.035  1.00  0.68           O
ATOM   2909  H   GLU A 180     189.860 131.378 145.199  1.00  0.00           H
ATOM   2910  HA  GLU A 180     192.380 130.983 143.945  1.00  0.00           H
ATOM   2911  HB2 GLU A 180     190.261 129.041 144.894  1.00  0.00           H
ATOM   2912  HB3 GLU A 180     191.805 128.520 144.201  1.00  0.00           H
ATOM   2913  HG2 GLU A 180     191.346 130.074 146.779  1.00  0.00           H
ATOM   2914  HG3 GLU A 180     192.950 129.887 146.044  1.00  0.00           H
ATOM   2915  N   ARG A 181     192.059 129.839 141.680  1.00  0.70           N
ATOM   2916  CA  ARG A 181     191.900 129.629 140.251  1.00  0.70           C
ATOM   2917  C   ARG A 181     192.102 128.193 139.789  1.00  0.70           C
ATOM   2918  O   ARG A 181     193.160 127.592 139.967  1.00  0.70           O
ATOM   2919  CB  ARG A 181     192.864 130.546 139.461  1.00  0.70           C
ATOM   2920  CG  ARG A 181     192.671 132.048 139.743  1.00  0.70           C
ATOM   2921  CD  ARG A 181     191.262 132.532 139.404  1.00  0.70           C
ATOM   2922  NE  ARG A 181     191.261 134.000 139.629  1.00  0.70           N
ATOM   2923  CZ  ARG A 181     190.232 134.804 139.355  1.00  0.70           C
ATOM   2924  NH1 ARG A 181     189.063 134.341 138.928  1.00  0.70           N
ATOM   2925  NH2 ARG A 181     190.416 136.107 139.520  1.00  0.70           N
ATOM   2926  H   ARG A 181     192.958 129.660 142.104  1.00  0.00           H
ATOM   2927  HA  ARG A 181     190.883 129.918 139.988  1.00  0.00           H
ATOM   2928  HB2 ARG A 181     193.887 130.276 139.725  1.00  0.00           H
ATOM   2929  HB3 ARG A 181     192.720 130.369 138.395  1.00  0.00           H
ATOM   2930  HG2 ARG A 181     192.858 132.232 140.801  1.00  0.00           H
ATOM   2931  HG3 ARG A 181     193.391 132.614 139.153  1.00  0.00           H
ATOM   2932  HD2 ARG A 181     191.027 132.310 138.363  1.00  0.00           H
ATOM   2933  HD3 ARG A 181     190.535 132.054 140.061  1.00  0.00           H
ATOM   2934  HE  ARG A 181     192.095 134.418 140.015  1.00  0.00           H
ATOM   2935 HH11 ARG A 181     188.929 133.348 138.802  1.00  0.00           H
ATOM   2936 HH12 ARG A 181     188.308 134.982 138.729  1.00  0.00           H
ATOM   2937 HH21 ARG A 181     191.308 136.454 139.843  1.00  0.00           H
ATOM   2938 HH22 ARG A 181     189.664 136.752 139.322  1.00  0.00           H
ATOM   2939  N   CYS A 182     191.084 127.605 139.128  1.00  0.80           N
ATOM   2940  CA  CYS A 182     191.112 126.213 138.711  1.00  0.80           C
ATOM   2941  C   CYS A 182     190.259 125.966 137.479  1.00  0.80           C
ATOM   2942  O   CYS A 182     189.258 126.640 137.249  1.00  0.80           O
ATOM   2943  CB  CYS A 182     190.679 125.243 139.852  1.00  0.80           C
ATOM   2944  SG  CYS A 182     188.974 125.517 140.459  1.00  0.80           S
ATOM   2945  H   CYS A 182     190.266 128.157 138.913  1.00  0.00           H
ATOM   2946  HA  CYS A 182     192.142 125.971 138.449  1.00  0.00           H
ATOM   2947  HB2 CYS A 182     191.365 125.372 140.689  1.00  0.00           H
ATOM   2948  HB3 CYS A 182     190.760 124.219 139.489  1.00  0.00           H
ATOM   2949  HG  CYS A 182     188.712 124.661 141.451  1.00  0.00           H
ATOM   2950  N   TRP A 183     190.651 124.970 136.656  1.00  0.75           N
ATOM   2951  CA  TRP A 183     189.944 124.622 135.434  1.00  0.75           C
ATOM   2952  C   TRP A 183     189.063 123.397 135.602  1.00  0.75           C
ATOM   2953  O   TRP A 183     188.182 123.151 134.778  1.00  0.75           O
ATOM   2954  CB  TRP A 183     190.968 124.219 134.340  1.00  0.75           C
ATOM   2955  CG  TRP A 183     191.816 125.343 133.788  1.00  0.75           C
ATOM   2956  CD1 TRP A 183     193.103 125.693 134.093  1.00  0.75           C
ATOM   2957  CD2 TRP A 183     191.420 126.163 132.675  1.00  0.75           C
ATOM   2958  NE1 TRP A 183     193.550 126.663 133.217  1.00  0.75           N
ATOM   2959  CE2 TRP A 183     192.528 126.971 132.346  1.00  0.75           C
ATOM   2960  CE3 TRP A 183     190.233 126.232 131.946  1.00  0.75           C
ATOM   2961  CZ2 TRP A 183     192.469 127.860 131.282  1.00  0.75           C
ATOM   2962  CZ3 TRP A 183     190.170 127.142 130.880  1.00  0.75           C
ATOM   2963  CH2 TRP A 183     191.271 127.948 130.554  1.00  0.75           C
ATOM   2964  H   TRP A 183     191.476 124.441 136.901  1.00  0.00           H
ATOM   2965  HA  TRP A 183     189.347 125.468 135.094  1.00  0.00           H
ATOM   2966  HB2 TRP A 183     191.638 123.473 134.767  1.00  0.00           H
ATOM   2967  HB3 TRP A 183     190.425 123.760 133.514  1.00  0.00           H
ATOM   2968  HD1 TRP A 183     193.684 125.273 134.900  1.00  0.00           H
ATOM   2969  HE3 TRP A 183     189.389 125.605 132.194  1.00  0.00           H
ATOM   2970  HZ2 TRP A 183     193.322 128.468 131.020  1.00  0.00           H
ATOM   2971  HZ3 TRP A 183     189.261 127.223 130.302  1.00  0.00           H
ATOM   2972  HH2 TRP A 183     191.196 128.645 129.733  1.00  0.00           H
ATOM   2973  HE1 TRP A 183     194.471 127.077 133.215  1.00  0.00           H
ATOM   2974  N   THR A 184     189.325 122.606 136.660  1.00  0.77           N
ATOM   2975  CA  THR A 184     188.659 121.356 137.000  1.00  0.77           C
ATOM   2976  C   THR A 184     188.900 121.164 138.477  1.00  0.77           C
ATOM   2977  O   THR A 184     189.655 121.912 139.101  1.00  0.77           O
ATOM   2978  CB  THR A 184     189.141 120.062 136.300  1.00  0.77           C
ATOM   2979  OG1 THR A 184     190.461 119.643 136.657  1.00  0.77           O
ATOM   2980  CG2 THR A 184     189.158 120.224 134.780  1.00  0.77           C
ATOM   2981  H   THR A 184     190.060 122.911 137.282  1.00  0.00           H
ATOM   2982  HA  THR A 184     187.588 121.470 136.830  1.00  0.00           H
ATOM   2983  HB  THR A 184     188.448 119.259 136.551  1.00  0.00           H
ATOM   2984  HG1 THR A 184     190.431 118.744 136.992  1.00  0.00           H
ATOM   2985 HG21 THR A 184     190.106 120.666 134.472  1.00  0.00           H
ATOM   2986 HG22 THR A 184     189.042 119.248 134.309  1.00  0.00           H
ATOM   2987 HG23 THR A 184     188.338 120.874 134.475  1.00  0.00           H
ATOM   2988  N   HIS A 185     188.335 120.100 139.071  1.00  0.69           N
ATOM   2989  CA  HIS A 185     188.554 119.717 140.453  1.00  0.69           C
ATOM   2990  C   HIS A 185     189.956 119.205 140.758  1.00  0.69           C
ATOM   2991  O   HIS A 185     190.310 118.993 141.918  1.00  0.69           O
ATOM   2992  CB  HIS A 185     187.582 118.577 140.836  1.00  0.69           C
ATOM   2993  CG  HIS A 185     187.761 117.330 140.012  1.00  0.69           C
ATOM   2994  ND1 HIS A 185     187.266 117.320 138.731  1.00  0.69           N
ATOM   2995  CD2 HIS A 185     188.376 116.146 140.280  1.00  0.69           C
ATOM   2996  CE1 HIS A 185     187.570 116.143 138.237  1.00  0.69           C
ATOM   2997  NE2 HIS A 185     188.247 115.386 139.135  1.00  0.69           N
ATOM   2998  H   HIS A 185     187.715 119.527 138.517  1.00  0.00           H
ATOM   2999  HA  HIS A 185     188.351 120.578 141.090  1.00  0.00           H
ATOM   3000  HB2 HIS A 185     186.561 118.935 140.702  1.00  0.00           H
ATOM   3001  HB3 HIS A 185     187.731 118.327 141.887  1.00  0.00           H
ATOM   3002  HD2 HIS A 185     188.865 115.860 141.200  1.00  0.00           H
ATOM   3003  HE1 HIS A 185     187.313 115.818 137.240  1.00  0.00           H
ATOM   3004  HE2 HIS A 185     188.591 114.447 138.993  1.00  0.00           H
ATOM   3005  N   SER A 186     190.781 118.931 139.728  1.00  0.73           N
ATOM   3006  CA  SER A 186     192.141 118.442 139.930  1.00  0.73           C
ATOM   3007  C   SER A 186     193.205 119.365 139.389  1.00  0.73           C
ATOM   3008  O   SER A 186     194.365 119.189 139.752  1.00  0.73           O
ATOM   3009  CB  SER A 186     192.375 117.047 139.292  1.00  0.73           C
ATOM   3010  OG  SER A 186     191.940 116.006 140.175  1.00  0.73           O
ATOM   3011  H   SER A 186     190.447 119.069 138.785  1.00  0.00           H
ATOM   3012  HA  SER A 186     192.302 118.346 141.004  1.00  0.00           H
ATOM   3013  HB2 SER A 186     193.438 116.921 139.087  1.00  0.00           H
ATOM   3014  HB3 SER A 186     191.819 116.981 138.357  1.00  0.00           H
ATOM   3015  HG  SER A 186     192.093 115.152 139.764  1.00  0.00           H
ATOM   3016  N   HIS A 187     192.863 120.377 138.566  1.00  0.73           N
ATOM   3017  CA  HIS A 187     193.863 121.208 137.913  1.00  0.73           C
ATOM   3018  C   HIS A 187     193.672 122.686 138.205  1.00  0.73           C
ATOM   3019  O   HIS A 187     192.717 123.318 137.749  1.00  0.73           O
ATOM   3020  CB  HIS A 187     193.818 121.031 136.377  1.00  0.73           C
ATOM   3021  CG  HIS A 187     194.144 119.640 135.930  1.00  0.73           C
ATOM   3022  ND1 HIS A 187     195.389 119.128 136.223  1.00  0.73           N
ATOM   3023  CD2 HIS A 187     193.436 118.754 135.180  1.00  0.73           C
ATOM   3024  CE1 HIS A 187     195.424 117.946 135.645  1.00  0.73           C
ATOM   3025  NE2 HIS A 187     194.265 117.667 135.000  1.00  0.73           N
ATOM   3026  H   HIS A 187     191.885 120.563 138.398  1.00  0.00           H
ATOM   3027  HA  HIS A 187     194.849 120.909 138.268  1.00  0.00           H
ATOM   3028  HB2 HIS A 187     194.538 121.716 135.929  1.00  0.00           H
ATOM   3029  HB3 HIS A 187     192.820 121.289 136.023  1.00  0.00           H
ATOM   3030  HD2 HIS A 187     192.431 118.876 134.803  1.00  0.00           H
ATOM   3031  HE1 HIS A 187     196.273 117.279 135.680  1.00  0.00           H
ATOM   3032  HE2 HIS A 187     194.050 116.825 134.486  1.00  0.00           H
ATOM   3033  N   CYS A 188     194.618 123.291 138.955  1.00  0.79           N
ATOM   3034  CA  CYS A 188     194.746 124.733 139.113  1.00  0.79           C
ATOM   3035  C   CYS A 188     195.090 125.444 137.807  1.00  0.79           C
ATOM   3036  O   CYS A 188     195.741 124.891 136.924  1.00  0.79           O
ATOM   3037  CB  CYS A 188     195.819 125.142 140.157  1.00  0.79           C
ATOM   3038  SG  CYS A 188     195.540 124.499 141.836  1.00  0.79           S
ATOM   3039  H   CYS A 188     195.282 122.704 139.439  1.00  0.00           H
ATOM   3040  HA  CYS A 188     193.785 125.116 139.457  1.00  0.00           H
ATOM   3041  HB2 CYS A 188     195.841 126.230 140.211  1.00  0.00           H
ATOM   3042  HB3 CYS A 188     196.791 124.793 139.809  1.00  0.00           H
ATOM   3043  HG  CYS A 188     196.499 124.948 142.651  1.00  0.00           H
ATOM   3044  N   GLN A 189     194.669 126.712 137.646  1.00  0.76           N
ATOM   3045  CA  GLN A 189     195.178 127.558 136.580  1.00  0.76           C
ATOM   3046  C   GLN A 189     196.620 127.970 136.853  1.00  0.76           C
ATOM   3047  O   GLN A 189     196.953 128.447 137.936  1.00  0.76           O
ATOM   3048  CB  GLN A 189     194.299 128.818 136.400  1.00  0.76           C
ATOM   3049  CG  GLN A 189     194.718 129.727 135.218  1.00  0.76           C
ATOM   3050  CD  GLN A 189     193.775 130.920 135.059  1.00  0.76           C
ATOM   3051  OE1 GLN A 189     192.832 131.132 135.824  1.00  0.76           O
ATOM   3052  NE2 GLN A 189     194.047 131.741 134.019  1.00  0.76           N
ATOM   3053  H   GLN A 189     193.981 127.086 138.283  1.00  0.00           H
ATOM   3054  HA  GLN A 189     195.155 126.989 135.651  1.00  0.00           H
ATOM   3055  HB2 GLN A 189     193.271 128.496 136.234  1.00  0.00           H
ATOM   3056  HB3 GLN A 189     194.336 129.403 137.319  1.00  0.00           H
ATOM   3057  HG2 GLN A 189     194.703 129.141 134.299  1.00  0.00           H
ATOM   3058  HG3 GLN A 189     195.730 130.093 135.391  1.00  0.00           H
ATOM   3059 HE21 GLN A 189     194.828 131.543 133.410  1.00  0.00           H
ATOM   3060 HE22 GLN A 189     193.469 132.552 133.851  1.00  0.00           H
ATOM   3061  N   LYS A 190     197.534 127.792 135.880  1.00  0.76           N
ATOM   3062  CA  LYS A 190     198.906 128.227 136.036  1.00  0.76           C
ATOM   3063  C   LYS A 190     199.044 129.736 135.874  1.00  0.76           C
ATOM   3064  O   LYS A 190     198.688 130.314 134.851  1.00  0.76           O
ATOM   3065  CB  LYS A 190     199.838 127.487 135.048  1.00  0.76           C
ATOM   3066  CG  LYS A 190     201.340 127.768 135.245  1.00  0.76           C
ATOM   3067  CD  LYS A 190     202.191 126.859 134.341  1.00  0.76           C
ATOM   3068  CE  LYS A 190     203.664 127.256 134.188  1.00  0.76           C
ATOM   3069  NZ  LYS A 190     204.405 127.150 135.465  1.00  0.76           N
ATOM   3070  H   LYS A 190     197.255 127.343 135.019  1.00  0.00           H
ATOM   3071  HA  LYS A 190     199.223 127.971 137.047  1.00  0.00           H
ATOM   3072  HB2 LYS A 190     199.675 126.416 135.166  1.00  0.00           H
ATOM   3073  HB3 LYS A 190     199.562 127.770 134.032  1.00  0.00           H
ATOM   3074  HG2 LYS A 190     201.604 127.584 136.286  1.00  0.00           H
ATOM   3075  HG3 LYS A 190     201.545 128.810 135.002  1.00  0.00           H
ATOM   3076  HD2 LYS A 190     202.158 125.851 134.755  1.00  0.00           H
ATOM   3077  HD3 LYS A 190     201.737 126.838 133.350  1.00  0.00           H
ATOM   3078  HE2 LYS A 190     203.715 128.286 133.836  1.00  0.00           H
ATOM   3079  HE3 LYS A 190     204.133 126.605 133.450  1.00  0.00           H
ATOM   3080  HZ1 LYS A 190     204.338 128.024 135.966  1.00  0.00           H
ATOM   3081  HZ2 LYS A 190     205.375 126.944 135.276  1.00  0.00           H
ATOM   3082  HZ3 LYS A 190     204.007 126.410 136.025  1.00  0.00           H
ATOM   3083  N   VAL A 191     199.573 130.415 136.908  1.00  0.80           N
ATOM   3084  CA  VAL A 191     199.815 131.845 136.891  1.00  0.80           C
ATOM   3085  C   VAL A 191     201.304 132.035 137.096  1.00  0.80           C
ATOM   3086  O   VAL A 191     201.926 131.355 137.910  1.00  0.80           O
ATOM   3087  CB  VAL A 191     199.013 132.582 137.964  1.00  0.80           C
ATOM   3088  CG1 VAL A 191     199.334 134.090 137.973  1.00  0.80           C
ATOM   3089  CG2 VAL A 191     197.507 132.379 137.695  1.00  0.80           C
ATOM   3090  H   VAL A 191     199.815 129.900 137.743  1.00  0.00           H
ATOM   3091  HA  VAL A 191     199.540 132.238 135.912  1.00  0.00           H
ATOM   3092  HB  VAL A 191     199.258 132.162 138.940  1.00  0.00           H
ATOM   3093 HG11 VAL A 191     200.398 134.234 138.163  1.00  0.00           H
ATOM   3094 HG12 VAL A 191     198.755 134.580 138.756  1.00  0.00           H
ATOM   3095 HG13 VAL A 191     199.076 134.522 137.006  1.00  0.00           H
ATOM   3096 HG21 VAL A 191     196.928 132.902 138.456  1.00  0.00           H
ATOM   3097 HG22 VAL A 191     197.257 132.777 136.712  1.00  0.00           H
ATOM   3098 HG23 VAL A 191     197.272 131.315 137.727  1.00  0.00           H
ATOM   3099  N   CYS A 192     201.930 132.940 136.319  1.00  0.79           N
ATOM   3100  CA  CYS A 192     203.358 133.191 136.371  1.00  0.79           C
ATOM   3101  C   CYS A 192     203.648 134.569 136.953  1.00  0.79           C
ATOM   3102  O   CYS A 192     202.775 135.443 136.905  1.00  0.79           O
ATOM   3103  CB  CYS A 192     203.980 133.103 134.955  1.00  0.79           C
ATOM   3104  SG  CYS A 192     204.038 131.391 134.354  1.00  0.79           S
ATOM   3105  H   CYS A 192     201.375 133.473 135.665  1.00  0.00           H
ATOM   3106  HA  CYS A 192     203.824 132.437 137.006  1.00  0.00           H
ATOM   3107  HB2 CYS A 192     203.379 133.699 134.268  1.00  0.00           H
ATOM   3108  HB3 CYS A 192     204.993 133.505 134.985  1.00  0.00           H
ATOM   3109  HG  CYS A 192     205.264 131.120 133.898  1.00  0.00           H
ATOM   3110  N   PRO A 193     204.837 134.818 137.527  1.00  0.79           N
ATOM   3111  CA  PRO A 193     205.307 136.159 137.873  1.00  0.79           C
ATOM   3112  C   PRO A 193     205.236 137.178 136.746  1.00  0.79           C
ATOM   3113  O   PRO A 193     205.329 136.815 135.575  1.00  0.79           O
ATOM   3114  CB  PRO A 193     206.755 135.949 138.352  1.00  0.79           C
ATOM   3115  CG  PRO A 193     206.795 134.488 138.802  1.00  0.79           C
ATOM   3116  CD  PRO A 193     205.868 133.810 137.798  1.00  0.79           C
ATOM   3117  HA  PRO A 193     204.715 136.528 138.711  1.00  0.00           H
ATOM   3118  HB2 PRO A 193     206.987 136.615 139.183  1.00  0.00           H
ATOM   3119  HB3 PRO A 193     207.453 136.111 137.530  1.00  0.00           H
ATOM   3120  HG2 PRO A 193     207.806 134.084 138.740  1.00  0.00           H
ATOM   3121  HG3 PRO A 193     206.403 134.388 139.814  1.00  0.00           H
ATOM   3122  HD2 PRO A 193     205.426 132.910 138.226  1.00  0.00           H
ATOM   3123  HD3 PRO A 193     206.411 133.568 136.884  1.00  0.00           H
ATOM   3124  N   THR A 194     205.106 138.475 137.078  1.00  0.70           N
ATOM   3125  CA  THR A 194     204.852 139.556 136.126  1.00  0.70           C
ATOM   3126  C   THR A 194     206.023 139.871 135.213  1.00  0.70           C
ATOM   3127  O   THR A 194     205.859 140.410 134.121  1.00  0.70           O
ATOM   3128  CB  THR A 194     204.445 140.842 136.836  1.00  0.70           C
ATOM   3129  OG1 THR A 194     205.349 141.145 137.891  1.00  0.70           O
ATOM   3130  CG2 THR A 194     203.068 140.641 137.488  1.00  0.70           C
ATOM   3131  H   THR A 194     205.190 138.720 138.054  1.00  0.00           H
ATOM   3132  HA  THR A 194     204.017 139.250 135.496  1.00  0.00           H
ATOM   3133  HB  THR A 194     204.407 141.668 136.125  1.00  0.00           H
ATOM   3134  HG1 THR A 194     206.228 141.280 137.531  1.00  0.00           H
ATOM   3135 HG21 THR A 194     202.770 141.557 137.998  1.00  0.00           H
ATOM   3136 HG22 THR A 194     203.123 139.825 138.209  1.00  0.00           H
ATOM   3137 HG23 THR A 194     202.334 140.398 136.720  1.00  0.00           H
ATOM   3138  N   ILE A 195     207.248 139.489 135.614  1.00  0.68           N
ATOM   3139  CA  ILE A 195     208.439 139.541 134.785  1.00  0.68           C
ATOM   3140  C   ILE A 195     208.334 138.651 133.535  1.00  0.68           C
ATOM   3141  O   ILE A 195     208.727 139.044 132.428  1.00  0.68           O
ATOM   3142  CB  ILE A 195     209.690 139.277 135.626  1.00  0.68           C
ATOM   3143  CG1 ILE A 195     210.984 139.446 134.797  1.00  0.68           C
ATOM   3144  CG2 ILE A 195     209.615 137.909 136.340  1.00  0.68           C
ATOM   3145  CD1 ILE A 195     212.248 139.504 135.663  1.00  0.68           C
ATOM   3146  H   ILE A 195     207.347 139.142 136.557  1.00  0.00           H
ATOM   3147  HA  ILE A 195     208.520 140.567 134.426  1.00  0.00           H
ATOM   3148  HB  ILE A 195     209.713 140.039 136.405  1.00  0.00           H
ATOM   3149 HG12 ILE A 195     211.071 138.602 134.113  1.00  0.00           H
ATOM   3150 HG13 ILE A 195     210.913 140.365 134.216  1.00  0.00           H
ATOM   3151 HG21 ILE A 195     210.520 137.755 136.928  1.00  0.00           H
ATOM   3152 HG22 ILE A 195     209.525 137.116 135.597  1.00  0.00           H
ATOM   3153 HG23 ILE A 195     208.747 137.890 136.998  1.00  0.00           H
ATOM   3154 HD11 ILE A 195     213.122 139.623 135.023  1.00  0.00           H
ATOM   3155 HD12 ILE A 195     212.339 138.580 136.234  1.00  0.00           H
ATOM   3156 HD13 ILE A 195     212.181 140.349 136.348  1.00  0.00           H
ATOM   3157  N   CYS A 196     207.708 137.456 133.665  1.00  0.80           N
ATOM   3158  CA  CYS A 196     207.558 136.453 132.617  1.00  0.80           C
ATOM   3159  C   CYS A 196     206.347 136.708 131.725  1.00  0.80           C
ATOM   3160  O   CYS A 196     205.640 135.779 131.343  1.00  0.80           O
ATOM   3161  CB  CYS A 196     207.427 135.017 133.199  1.00  0.80           C
ATOM   3162  SG  CYS A 196     208.759 134.512 134.336  1.00  0.80           S
ATOM   3163  H   CYS A 196     207.310 137.241 134.568  1.00  0.00           H
ATOM   3164  HA  CYS A 196     208.450 136.483 131.991  1.00  0.00           H
ATOM   3165  HB2 CYS A 196     206.483 134.958 133.740  1.00  0.00           H
ATOM   3166  HB3 CYS A 196     207.395 134.310 132.370  1.00  0.00           H
ATOM   3167  HG  CYS A 196     208.250 133.751 135.309  1.00  0.00           H
ATOM   3168  N   LYS A 197     206.124 137.987 131.357  1.00  0.71           N
ATOM   3169  CA  LYS A 197     204.973 138.600 130.696  1.00  0.71           C
ATOM   3170  C   LYS A 197     204.076 137.707 129.845  1.00  0.71           C
ATOM   3171  O   LYS A 197     202.925 137.468 130.192  1.00  0.71           O
ATOM   3172  CB  LYS A 197     205.449 139.811 129.847  1.00  0.71           C
ATOM   3173  CG  LYS A 197     206.128 140.916 130.679  1.00  0.71           C
ATOM   3174  CD  LYS A 197     206.719 142.045 129.815  1.00  0.71           C
ATOM   3175  CE  LYS A 197     208.001 141.674 129.059  1.00  0.71           C
ATOM   3176  NZ  LYS A 197     209.093 141.376 130.018  1.00  0.71           N
ATOM   3177  H   LYS A 197     206.876 138.626 131.574  1.00  0.00           H
ATOM   3178  HA  LYS A 197     204.343 139.006 131.487  1.00  0.00           H
ATOM   3179  HB2 LYS A 197     204.583 140.241 129.344  1.00  0.00           H
ATOM   3180  HB3 LYS A 197     206.152 139.457 129.094  1.00  0.00           H
ATOM   3181  HG2 LYS A 197     206.933 140.467 131.261  1.00  0.00           H
ATOM   3182  HG3 LYS A 197     205.395 141.343 131.363  1.00  0.00           H
ATOM   3183  HD2 LYS A 197     205.967 142.340 129.083  1.00  0.00           H
ATOM   3184  HD3 LYS A 197     206.931 142.899 130.458  1.00  0.00           H
ATOM   3185  HE2 LYS A 197     208.298 142.508 128.423  1.00  0.00           H
ATOM   3186  HE3 LYS A 197     207.814 140.796 128.440  1.00  0.00           H
ATOM   3187  HZ1 LYS A 197     209.549 142.236 130.287  1.00  0.00           H
ATOM   3188  HZ2 LYS A 197     209.765 140.761 129.582  1.00  0.00           H
ATOM   3189  HZ3 LYS A 197     208.709 140.928 130.838  1.00  0.00           H
ATOM   3190  N   SER A 198     204.585 137.188 128.711  1.00  0.83           N
ATOM   3191  CA  SER A 198     203.833 136.239 127.895  1.00  0.83           C
ATOM   3192  C   SER A 198     204.651 135.002 127.620  1.00  0.83           C
ATOM   3193  O   SER A 198     204.175 134.023 127.050  1.00  0.83           O
ATOM   3194  CB  SER A 198     203.483 136.817 126.499  1.00  0.83           C
ATOM   3195  OG  SER A 198     202.978 138.148 126.595  1.00  0.83           O
ATOM   3196  H   SER A 198     205.512 137.463 128.417  1.00  0.00           H
ATOM   3197  HA  SER A 198     202.916 135.960 128.414  1.00  0.00           H
ATOM   3198  HB2 SER A 198     204.382 136.823 125.883  1.00  0.00           H
ATOM   3199  HB3 SER A 198     202.732 136.183 126.028  1.00  0.00           H
ATOM   3200  HG  SER A 198     202.771 138.476 125.717  1.00  0.00           H
ATOM   3201  N   HIS A 199     205.929 135.008 128.038  1.00  0.82           N
ATOM   3202  CA  HIS A 199     206.916 134.031 127.608  1.00  0.82           C
ATOM   3203  C   HIS A 199     206.719 132.695 128.277  1.00  0.82           C
ATOM   3204  O   HIS A 199     207.160 131.654 127.798  1.00  0.82           O
ATOM   3205  CB  HIS A 199     208.334 134.545 127.934  1.00  0.82           C
ATOM   3206  CG  HIS A 199     208.572 135.897 127.345  1.00  0.82           C
ATOM   3207  ND1 HIS A 199     208.439 136.044 125.986  1.00  0.82           N
ATOM   3208  CD2 HIS A 199     208.948 137.075 127.905  1.00  0.82           C
ATOM   3209  CE1 HIS A 199     208.747 137.289 125.728  1.00  0.82           C
ATOM   3210  NE2 HIS A 199     209.062 137.968 126.857  1.00  0.82           N
ATOM   3211  H   HIS A 199     206.218 135.728 128.684  1.00  0.00           H
ATOM   3212  HA  HIS A 199     206.831 133.899 126.529  1.00  0.00           H
ATOM   3213  HB2 HIS A 199     208.450 134.604 129.016  1.00  0.00           H
ATOM   3214  HB3 HIS A 199     209.069 133.846 127.534  1.00  0.00           H
ATOM   3215  HD2 HIS A 199     209.122 137.273 128.952  1.00  0.00           H
ATOM   3216  HE1 HIS A 199     208.750 137.721 124.738  1.00  0.00           H
ATOM   3217  HE2 HIS A 199     209.329 138.940 126.920  1.00  0.00           H
ATOM   3218  N   GLY A 200     205.996 132.715 129.410  1.00  0.85           N
ATOM   3219  CA  GLY A 200     205.797 131.559 130.251  1.00  0.85           C
ATOM   3220  C   GLY A 200     206.866 131.452 131.293  1.00  0.85           C
ATOM   3221  O   GLY A 200     207.987 131.942 131.156  1.00  0.85           O
ATOM   3222  H   GLY A 200     205.569 133.587 129.688  1.00  0.00           H
ATOM   3223  HA2 GLY A 200     204.828 131.642 130.744  1.00  0.00           H
ATOM   3224  HA3 GLY A 200     205.809 130.661 129.633  1.00  0.00           H
ATOM   3225  N   CYS A 201     206.515 130.779 132.390  1.00  0.79           N
ATOM   3226  CA  CYS A 201     207.425 130.389 133.432  1.00  0.79           C
ATOM   3227  C   CYS A 201     207.382 128.879 133.468  1.00  0.79           C
ATOM   3228  O   CYS A 201     206.310 128.285 133.368  1.00  0.79           O
ATOM   3229  CB  CYS A 201     207.067 131.000 134.824  1.00  0.79           C
ATOM   3230  SG  CYS A 201     205.446 130.535 135.547  1.00  0.79           S
ATOM   3231  H   CYS A 201     205.543 130.526 132.496  1.00  0.00           H
ATOM   3232  HA  CYS A 201     208.431 130.706 133.157  1.00  0.00           H
ATOM   3233  HB2 CYS A 201     207.081 132.085 134.720  1.00  0.00           H
ATOM   3234  HB3 CYS A 201     207.847 130.716 135.530  1.00  0.00           H
ATOM   3235  HG  CYS A 201     205.432 129.224 135.804  1.00  0.00           H
ATOM   3236  N   THR A 202     208.533 128.201 133.589  1.00  0.79           N
ATOM   3237  CA  THR A 202     208.634 126.762 133.855  1.00  0.79           C
ATOM   3238  C   THR A 202     208.000 126.373 135.199  1.00  0.79           C
ATOM   3239  O   THR A 202     207.276 127.150 135.829  1.00  0.79           O
ATOM   3240  CB  THR A 202     210.064 126.252 133.668  1.00  0.79           C
ATOM   3241  OG1 THR A 202     210.210 124.845 133.805  1.00  0.79           O
ATOM   3242  CG2 THR A 202     210.963 126.912 134.702  1.00  0.79           C
ATOM   3243  H   THR A 202     209.394 128.720 133.490  1.00  0.00           H
ATOM   3244  HA  THR A 202     208.036 126.271 133.087  1.00  0.00           H
ATOM   3245  HB  THR A 202     210.408 126.541 132.675  1.00  0.00           H
ATOM   3246  HG1 THR A 202     210.032 124.421 132.962  1.00  0.00           H
ATOM   3247 HG21 THR A 202     211.057 127.974 134.477  1.00  0.00           H
ATOM   3248 HG22 THR A 202     211.948 126.447 134.676  1.00  0.00           H
ATOM   3249 HG23 THR A 202     210.528 126.787 135.694  1.00  0.00           H
ATOM   3250  N   ALA A 203     208.197 125.138 135.680  1.00  0.74           N
ATOM   3251  CA  ALA A 203     207.615 124.618 136.899  1.00  0.74           C
ATOM   3252  C   ALA A 203     208.025 125.397 138.146  1.00  0.74           C
ATOM   3253  O   ALA A 203     207.186 125.762 138.967  1.00  0.74           O
ATOM   3254  CB  ALA A 203     207.999 123.132 137.046  1.00  0.74           C
ATOM   3255  H   ALA A 203     208.798 124.522 135.151  1.00  0.00           H
ATOM   3256  HA  ALA A 203     206.531 124.678 136.806  1.00  0.00           H
ATOM   3257  HB1 ALA A 203     207.564 122.733 137.962  1.00  0.00           H
ATOM   3258  HB2 ALA A 203     209.084 123.040 137.089  1.00  0.00           H
ATOM   3259  HB3 ALA A 203     207.621 122.573 136.190  1.00  0.00           H
ATOM   3260  N   GLU A 204     209.324 125.722 138.258  1.00  0.70           N
ATOM   3261  CA  GLU A 204     209.958 126.327 139.407  1.00  0.70           C
ATOM   3262  C   GLU A 204     210.043 127.844 139.335  1.00  0.70           C
ATOM   3263  O   GLU A 204     210.646 128.494 140.185  1.00  0.70           O
ATOM   3264  CB  GLU A 204     211.376 125.719 139.601  1.00  0.70           C
ATOM   3265  CG  GLU A 204     212.448 126.012 138.506  1.00  0.70           C
ATOM   3266  CD  GLU A 204     212.344 125.229 137.193  1.00  0.70           C
ATOM   3267  OE1 GLU A 204     211.328 124.527 136.960  1.00  0.70           O
ATOM   3268  OE2 GLU A 204     213.273 125.392 136.362  1.00  0.70           O
ATOM   3269  H   GLU A 204     209.914 125.524 137.462  1.00  0.00           H
ATOM   3270  HA  GLU A 204     209.365 126.070 140.285  1.00  0.00           H
ATOM   3271  HB2 GLU A 204     211.260 124.637 139.662  1.00  0.00           H
ATOM   3272  HB3 GLU A 204     211.765 126.070 140.557  1.00  0.00           H
ATOM   3273  HG2 GLU A 204     213.425 125.797 138.939  1.00  0.00           H
ATOM   3274  HG3 GLU A 204     212.409 127.075 138.270  1.00  0.00           H
ATOM   3275  N   GLY A 205     209.377 128.468 138.340  1.00  0.77           N
ATOM   3276  CA  GLY A 205     209.186 129.918 138.328  1.00  0.77           C
ATOM   3277  C   GLY A 205     210.133 130.714 137.474  1.00  0.77           C
ATOM   3278  O   GLY A 205     210.063 131.938 137.455  1.00  0.77           O
ATOM   3279  H   GLY A 205     209.000 127.917 137.582  1.00  0.00           H
ATOM   3280  HA2 GLY A 205     208.175 130.115 137.973  1.00  0.00           H
ATOM   3281  HA3 GLY A 205     209.264 130.281 139.353  1.00  0.00           H
ATOM   3282  N   LEU A 206     211.025 130.069 136.708  1.00  0.79           N
ATOM   3283  CA  LEU A 206     211.953 130.759 135.827  1.00  0.79           C
ATOM   3284  C   LEU A 206     211.326 131.070 134.473  1.00  0.79           C
ATOM   3285  O   LEU A 206     210.666 130.230 133.864  1.00  0.79           O
ATOM   3286  CB  LEU A 206     213.228 129.913 135.597  1.00  0.79           C
ATOM   3287  CG  LEU A 206     214.042 129.639 136.877  1.00  0.79           C
ATOM   3288  CD1 LEU A 206     215.057 128.514 136.635  1.00  0.79           C
ATOM   3289  CD2 LEU A 206     214.761 130.902 137.370  1.00  0.79           C
ATOM   3290  H   LEU A 206     211.053 129.060 136.745  1.00  0.00           H
ATOM   3291  HA  LEU A 206     212.242 131.699 136.298  1.00  0.00           H
ATOM   3292  HB2 LEU A 206     213.868 130.443 134.892  1.00  0.00           H
ATOM   3293  HB3 LEU A 206     212.939 128.959 135.156  1.00  0.00           H
ATOM   3294  HG  LEU A 206     213.352 129.314 137.656  1.00  0.00           H
ATOM   3295 HD11 LEU A 206     214.536 127.623 136.285  1.00  0.00           H
ATOM   3296 HD12 LEU A 206     215.778 128.832 135.882  1.00  0.00           H
ATOM   3297 HD13 LEU A 206     215.578 128.289 137.565  1.00  0.00           H
ATOM   3298 HD21 LEU A 206     214.031 131.694 137.538  1.00  0.00           H
ATOM   3299 HD22 LEU A 206     215.281 130.683 138.303  1.00  0.00           H
ATOM   3300 HD23 LEU A 206     215.482 131.226 136.619  1.00  0.00           H
ATOM   3301  N   CYS A 207     211.493 132.311 133.964  1.00  0.85           N
ATOM   3302  CA  CYS A 207     210.992 132.702 132.653  1.00  0.85           C
ATOM   3303  C   CYS A 207     211.643 131.964 131.493  1.00  0.85           C
ATOM   3304  O   CYS A 207     212.837 131.677 131.493  1.00  0.85           O
ATOM   3305  CB  CYS A 207     211.136 134.217 132.348  1.00  0.85           C
ATOM   3306  SG  CYS A 207     210.483 135.335 133.628  1.00  0.85           S
ATOM   3307  H   CYS A 207     211.987 132.997 134.517  1.00  0.00           H
ATOM   3308  HA  CYS A 207     209.928 132.467 132.630  1.00  0.00           H
ATOM   3309  HB2 CYS A 207     212.196 134.435 132.220  1.00  0.00           H
ATOM   3310  HB3 CYS A 207     210.624 134.430 131.410  1.00  0.00           H
ATOM   3311  HG  CYS A 207     211.298 136.385 133.761  1.00  0.00           H
ATOM   3312  N   CYS A 208     210.861 131.663 130.445  1.00  0.84           N
ATOM   3313  CA  CYS A 208     211.372 131.077 129.222  1.00  0.84           C
ATOM   3314  C   CYS A 208     212.090 132.083 128.329  1.00  0.84           C
ATOM   3315  O   CYS A 208     212.071 133.287 128.575  1.00  0.84           O
ATOM   3316  CB  CYS A 208     210.220 130.449 128.412  1.00  0.84           C
ATOM   3317  SG  CYS A 208     209.311 129.190 129.352  1.00  0.84           S
ATOM   3318  H   CYS A 208     209.871 131.853 130.512  1.00  0.00           H
ATOM   3319  HA  CYS A 208     212.076 130.288 129.487  1.00  0.00           H
ATOM   3320  HB2 CYS A 208     209.526 131.238 128.124  1.00  0.00           H
ATOM   3321  HB3 CYS A 208     210.629 129.991 127.511  1.00  0.00           H
ATOM   3322  HG  CYS A 208     208.403 129.784 130.131  1.00  0.00           H
ATOM   3323  N   HIS A 209     212.740 131.593 127.243  1.00  0.83           N
ATOM   3324  CA  HIS A 209     213.334 132.427 126.198  1.00  0.83           C
ATOM   3325  C   HIS A 209     212.348 133.435 125.599  1.00  0.83           C
ATOM   3326  O   HIS A 209     211.144 133.196 125.565  1.00  0.83           O
ATOM   3327  CB  HIS A 209     213.915 131.563 125.047  1.00  0.83           C
ATOM   3328  CG  HIS A 209     214.651 132.351 124.015  1.00  0.83           C
ATOM   3329  ND1 HIS A 209     215.820 132.963 124.382  1.00  0.83           N
ATOM   3330  CD2 HIS A 209     214.326 132.686 122.742  1.00  0.83           C
ATOM   3331  CE1 HIS A 209     216.202 133.658 123.334  1.00  0.83           C
ATOM   3332  NE2 HIS A 209     215.326 133.530 122.308  1.00  0.83           N
ATOM   3333  H   HIS A 209     212.819 130.590 127.150  1.00  0.00           H
ATOM   3334  HA  HIS A 209     214.156 132.987 126.644  1.00  0.00           H
ATOM   3335  HB2 HIS A 209     214.602 130.834 125.477  1.00  0.00           H
ATOM   3336  HB3 HIS A 209     213.097 131.029 124.563  1.00  0.00           H
ATOM   3337  HD2 HIS A 209     213.462 132.359 122.183  1.00  0.00           H
ATOM   3338  HE1 HIS A 209     217.101 134.256 123.295  1.00  0.00           H
ATOM   3339  HE2 HIS A 209     215.393 133.968 121.401  1.00  0.00           H
ATOM   3340  N   SER A 210     212.832 134.584 125.084  1.00  0.86           N
ATOM   3341  CA  SER A 210     212.004 135.733 124.705  1.00  0.86           C
ATOM   3342  C   SER A 210     211.089 135.525 123.505  1.00  0.86           C
ATOM   3343  O   SER A 210     210.151 136.296 123.287  1.00  0.86           O
ATOM   3344  CB  SER A 210     212.885 136.975 124.399  1.00  0.86           C
ATOM   3345  OG  SER A 210     213.900 136.669 123.440  1.00  0.86           O
ATOM   3346  H   SER A 210     213.830 134.658 124.951  1.00  0.00           H
ATOM   3347  HA  SER A 210     211.374 135.980 125.560  1.00  0.00           H
ATOM   3348  HB2 SER A 210     212.252 137.770 124.005  1.00  0.00           H
ATOM   3349  HB3 SER A 210     213.355 137.316 125.321  1.00  0.00           H
ATOM   3350  HG  SER A 210     214.428 137.453 123.271  1.00  0.00           H
ATOM   3351  N   GLU A 211     211.359 134.464 122.722  1.00  0.82           N
ATOM   3352  CA  GLU A 211     210.565 134.042 121.584  1.00  0.82           C
ATOM   3353  C   GLU A 211     209.701 132.825 121.881  1.00  0.82           C
ATOM   3354  O   GLU A 211     208.988 132.321 121.010  1.00  0.82           O
ATOM   3355  CB  GLU A 211     211.484 133.737 120.374  1.00  0.82           C
ATOM   3356  CG  GLU A 211     212.176 135.011 119.847  1.00  0.82           C
ATOM   3357  CD  GLU A 211     211.086 135.924 119.317  1.00  0.82           C
ATOM   3358  OE1 GLU A 211     210.412 135.503 118.341  1.00  0.82           O
ATOM   3359  OE2 GLU A 211     210.844 137.006 119.908  1.00  0.82           O
ATOM   3360  H   GLU A 211     212.179 133.919 122.945  1.00  0.00           H
ATOM   3361  HA  GLU A 211     209.906 134.865 121.308  1.00  0.00           H
ATOM   3362  HB2 GLU A 211     210.883 133.305 119.574  1.00  0.00           H
ATOM   3363  HB3 GLU A 211     212.245 133.017 120.676  1.00  0.00           H
ATOM   3364  HG2 GLU A 211     212.717 135.504 120.655  1.00  0.00           H
ATOM   3365  HG3 GLU A 211     212.866 134.752 119.044  1.00  0.00           H
ATOM   3366  N   CYS A 212     209.697 132.326 123.133  1.00  0.86           N
ATOM   3367  CA  CYS A 212     208.742 131.315 123.555  1.00  0.86           C
ATOM   3368  C   CYS A 212     207.397 131.954 123.857  1.00  0.86           C
ATOM   3369  O   CYS A 212     207.298 133.133 124.182  1.00  0.86           O
ATOM   3370  CB  CYS A 212     209.173 130.540 124.833  1.00  0.86           C
ATOM   3371  SG  CYS A 212     210.698 129.544 124.712  1.00  0.86           S
ATOM   3372  H   CYS A 212     210.378 132.665 123.798  1.00  0.00           H
ATOM   3373  HA  CYS A 212     208.612 130.600 122.743  1.00  0.00           H
ATOM   3374  HB2 CYS A 212     209.318 131.270 125.629  1.00  0.00           H
ATOM   3375  HB3 CYS A 212     208.356 129.879 125.122  1.00  0.00           H
ATOM   3376  HG  CYS A 212     211.276 129.466 125.914  1.00  0.00           H
ATOM   3377  N   LEU A 213     206.305 131.181 123.749  1.00  0.83           N
ATOM   3378  CA  LEU A 213     204.997 131.654 124.137  1.00  0.83           C
ATOM   3379  C   LEU A 213     204.320 130.629 125.023  1.00  0.83           C
ATOM   3380  O   LEU A 213     204.125 129.471 124.653  1.00  0.83           O
ATOM   3381  CB  LEU A 213     204.153 131.948 122.876  1.00  0.83           C
ATOM   3382  CG  LEU A 213     202.810 132.669 123.105  1.00  0.83           C
ATOM   3383  CD1 LEU A 213     203.010 134.002 123.837  1.00  0.83           C
ATOM   3384  CD2 LEU A 213     202.119 132.926 121.759  1.00  0.83           C
ATOM   3385  H   LEU A 213     206.401 130.243 123.387  1.00  0.00           H
ATOM   3386  HA  LEU A 213     205.114 132.579 124.701  1.00  0.00           H
ATOM   3387  HB2 LEU A 213     204.754 132.569 122.212  1.00  0.00           H
ATOM   3388  HB3 LEU A 213     203.952 131.003 122.371  1.00  0.00           H
ATOM   3389  HG  LEU A 213     202.168 132.030 123.711  1.00  0.00           H
ATOM   3390 HD11 LEU A 213     203.501 133.822 124.793  1.00  0.00           H
ATOM   3391 HD12 LEU A 213     203.630 134.661 123.229  1.00  0.00           H
ATOM   3392 HD13 LEU A 213     202.041 134.471 124.008  1.00  0.00           H
ATOM   3393 HD21 LEU A 213     201.976 131.980 121.237  1.00  0.00           H
ATOM   3394 HD22 LEU A 213     201.151 133.395 121.932  1.00  0.00           H
ATOM   3395 HD23 LEU A 213     202.739 133.586 121.152  1.00  0.00           H
ATOM   3396  N   GLY A 214     203.958 131.039 126.255  1.00  0.88           N
ATOM   3397  CA  GLY A 214     203.201 130.232 127.204  1.00  0.88           C
ATOM   3398  C   GLY A 214     203.972 129.211 128.004  1.00  0.88           C
ATOM   3399  O   GLY A 214     203.769 129.101 129.210  1.00  0.88           O
ATOM   3400  H   GLY A 214     204.230 131.969 126.540  1.00  0.00           H
ATOM   3401  HA2 GLY A 214     202.727 130.914 127.911  1.00  0.00           H
ATOM   3402  HA3 GLY A 214     202.416 129.711 126.656  1.00  0.00           H
ATOM   3403  N   ASN A 215     204.856 128.414 127.373  1.00  0.84           N
ATOM   3404  CA  ASN A 215     205.468 127.285 128.053  1.00  0.84           C
ATOM   3405  C   ASN A 215     206.792 126.855 127.402  1.00  0.84           C
ATOM   3406  O   ASN A 215     207.019 127.018 126.200  1.00  0.84           O
ATOM   3407  CB  ASN A 215     204.445 126.102 128.071  1.00  0.84           C
ATOM   3408  CG  ASN A 215     204.722 125.094 129.180  1.00  0.84           C
ATOM   3409  OD1 ASN A 215     205.574 125.295 130.045  1.00  0.84           O
ATOM   3410  ND2 ASN A 215     203.968 123.971 129.175  1.00  0.84           N
ATOM   3411  H   ASN A 215     205.097 128.604 126.411  1.00  0.00           H
ATOM   3412  HA  ASN A 215     205.672 127.576 129.083  1.00  0.00           H
ATOM   3413  HB2 ASN A 215     204.494 125.586 127.112  1.00  0.00           H
ATOM   3414  HB3 ASN A 215     203.441 126.506 128.204  1.00  0.00           H
ATOM   3415 HD21 ASN A 215     203.271 123.834 128.457  1.00  0.00           H
ATOM   3416 HD22 ASN A 215     204.102 123.270 129.889  1.00  0.00           H
ATOM   3417  N   CYS A 216     207.691 126.248 128.203  1.00  0.83           N
ATOM   3418  CA  CYS A 216     208.973 125.716 127.775  1.00  0.83           C
ATOM   3419  C   CYS A 216     209.393 124.650 128.774  1.00  0.83           C
ATOM   3420  O   CYS A 216     208.920 124.648 129.905  1.00  0.83           O
ATOM   3421  CB  CYS A 216     210.095 126.793 127.665  1.00  0.83           C
ATOM   3422  SG  CYS A 216     210.560 127.605 129.238  1.00  0.83           S
ATOM   3423  H   CYS A 216     207.454 126.156 129.180  1.00  0.00           H
ATOM   3424  HA  CYS A 216     208.846 125.247 126.800  1.00  0.00           H
ATOM   3425  HB2 CYS A 216     209.753 127.565 126.976  1.00  0.00           H
ATOM   3426  HB3 CYS A 216     210.984 126.323 127.243  1.00  0.00           H
ATOM   3427  HG  CYS A 216     211.876 127.833 129.250  1.00  0.00           H
ATOM   3428  N   SER A 217     210.284 123.704 128.398  1.00  0.79           N
ATOM   3429  CA  SER A 217     210.762 122.706 129.361  1.00  0.79           C
ATOM   3430  C   SER A 217     212.023 123.117 130.095  1.00  0.79           C
ATOM   3431  O   SER A 217     212.287 122.643 131.194  1.00  0.79           O
ATOM   3432  CB  SER A 217     211.036 121.317 128.715  1.00  0.79           C
ATOM   3433  OG  SER A 217     212.014 121.368 127.668  1.00  0.79           O
ATOM   3434  H   SER A 217     210.623 123.685 127.447  1.00  0.00           H
ATOM   3435  HA  SER A 217     209.979 122.571 130.107  1.00  0.00           H
ATOM   3436  HB2 SER A 217     211.392 120.638 129.490  1.00  0.00           H
ATOM   3437  HB3 SER A 217     210.103 120.928 128.307  1.00  0.00           H
ATOM   3438  HG  SER A 217     212.783 120.853 127.923  1.00  0.00           H
ATOM   3439  N   GLN A 218     212.848 124.005 129.513  1.00  0.75           N
ATOM   3440  CA  GLN A 218     214.047 124.516 130.146  1.00  0.75           C
ATOM   3441  C   GLN A 218     214.086 126.001 129.818  1.00  0.75           C
ATOM   3442  O   GLN A 218     213.830 126.347 128.660  1.00  0.75           O
ATOM   3443  CB  GLN A 218     215.335 123.811 129.631  1.00  0.75           C
ATOM   3444  CG  GLN A 218     215.425 122.339 130.103  1.00  0.75           C
ATOM   3445  CD  GLN A 218     216.545 121.558 129.416  1.00  0.75           C
ATOM   3446  OE1 GLN A 218     216.757 121.632 128.201  1.00  0.75           O
ATOM   3447  NE2 GLN A 218     217.264 120.726 130.206  1.00  0.75           N
ATOM   3448  H   GLN A 218     212.620 124.333 128.585  1.00  0.00           H
ATOM   3449  HA  GLN A 218     213.970 124.386 131.225  1.00  0.00           H
ATOM   3450  HB2 GLN A 218     216.204 124.353 130.004  1.00  0.00           H
ATOM   3451  HB3 GLN A 218     215.342 123.835 128.541  1.00  0.00           H
ATOM   3452  HG2 GLN A 218     215.604 122.330 131.178  1.00  0.00           H
ATOM   3453  HG3 GLN A 218     214.475 121.845 129.900  1.00  0.00           H
ATOM   3454 HE21 GLN A 218     217.060 120.665 131.193  1.00  0.00           H
ATOM   3455 HE22 GLN A 218     218.004 120.166 129.808  1.00  0.00           H
ATOM   3456  N   PRO A 219     214.324 126.914 130.760  1.00  0.85           N
ATOM   3457  CA  PRO A 219     214.447 128.338 130.471  1.00  0.85           C
ATOM   3458  C   PRO A 219     215.710 128.670 129.689  1.00  0.85           C
ATOM   3459  O   PRO A 219     216.626 127.853 129.638  1.00  0.85           O
ATOM   3460  CB  PRO A 219     214.450 128.971 131.869  1.00  0.85           C
ATOM   3461  CG  PRO A 219     215.146 127.931 132.746  1.00  0.85           C
ATOM   3462  CD  PRO A 219     214.657 126.609 132.158  1.00  0.85           C
ATOM   3463  HA  PRO A 219     213.572 128.677 129.916  1.00  0.00           H
ATOM   3464  HB2 PRO A 219     215.004 129.910 131.868  1.00  0.00           H
ATOM   3465  HB3 PRO A 219     213.429 129.135 132.213  1.00  0.00           H
ATOM   3466  HG2 PRO A 219     216.230 128.017 132.671  1.00  0.00           H
ATOM   3467  HG3 PRO A 219     214.826 128.030 133.783  1.00  0.00           H
ATOM   3468  HD2 PRO A 219     213.776 126.255 132.693  1.00  0.00           H
ATOM   3469  HD3 PRO A 219     215.449 125.862 132.202  1.00  0.00           H
ATOM   3470  N   ASP A 220     215.733 129.863 129.054  1.00  0.77           N
ATOM   3471  CA  ASP A 220     216.849 130.428 128.308  1.00  0.77           C
ATOM   3472  C   ASP A 220     217.393 129.550 127.168  1.00  0.77           C
ATOM   3473  O   ASP A 220     218.590 129.440 126.916  1.00  0.77           O
ATOM   3474  CB  ASP A 220     217.941 130.948 129.289  1.00  0.77           C
ATOM   3475  CG  ASP A 220     218.637 132.209 128.794  1.00  0.77           C
ATOM   3476  OD1 ASP A 220     218.149 132.818 127.809  1.00  0.77           O
ATOM   3477  OD2 ASP A 220     219.634 132.605 129.451  1.00  0.77           O
ATOM   3478  H   ASP A 220     214.891 130.419 129.102  1.00  0.00           H
ATOM   3479  HA  ASP A 220     216.450 131.318 127.822  1.00  0.00           H
ATOM   3480  HB2 ASP A 220     217.471 131.165 130.248  1.00  0.00           H
ATOM   3481  HB3 ASP A 220     218.687 130.167 129.432  1.00  0.00           H
ATOM   3482  N   ASP A 221     216.483 128.895 126.416  1.00  0.81           N
ATOM   3483  CA  ASP A 221     216.852 128.139 125.244  1.00  0.81           C
ATOM   3484  C   ASP A 221     215.748 128.333 124.193  1.00  0.81           C
ATOM   3485  O   ASP A 221     214.597 127.955 124.447  1.00  0.81           O
ATOM   3486  CB  ASP A 221     217.047 126.652 125.660  1.00  0.81           C
ATOM   3487  CG  ASP A 221     217.567 125.739 124.575  1.00  0.81           C
ATOM   3488  OD1 ASP A 221     217.388 126.081 123.382  1.00  0.81           O
ATOM   3489  OD2 ASP A 221     218.012 124.606 124.911  1.00  0.81           O
ATOM   3490  H   ASP A 221     215.510 128.936 126.683  1.00  0.00           H
ATOM   3491  HA  ASP A 221     217.792 128.526 124.850  1.00  0.00           H
ATOM   3492  HB2 ASP A 221     216.083 126.266 125.991  1.00  0.00           H
ATOM   3493  HB3 ASP A 221     217.739 126.617 126.501  1.00  0.00           H
ATOM   3494  N   PRO A 222     215.995 128.887 123.002  1.00  0.86           N
ATOM   3495  CA  PRO A 222     214.990 129.004 121.948  1.00  0.86           C
ATOM   3496  C   PRO A 222     214.659 127.681 121.285  1.00  0.86           C
ATOM   3497  O   PRO A 222     213.740 127.646 120.468  1.00  0.86           O
ATOM   3498  CB  PRO A 222     215.635 129.970 120.942  1.00  0.86           C
ATOM   3499  CG  PRO A 222     217.140 129.758 121.121  1.00  0.86           C
ATOM   3500  CD  PRO A 222     217.270 129.501 122.621  1.00  0.86           C
ATOM   3501  HA  PRO A 222     214.082 129.449 122.354  1.00  0.00           H
ATOM   3502  HB2 PRO A 222     215.361 131.001 121.168  1.00  0.00           H
ATOM   3503  HB3 PRO A 222     215.335 129.713 119.926  1.00  0.00           H
ATOM   3504  HG2 PRO A 222     217.487 128.900 120.544  1.00  0.00           H
ATOM   3505  HG3 PRO A 222     217.689 130.656 120.838  1.00  0.00           H
ATOM   3506  HD2 PRO A 222     217.423 130.436 123.160  1.00  0.00           H
ATOM   3507  HD3 PRO A 222     218.093 128.814 122.816  1.00  0.00           H
ATOM   3508  N   THR A 223     215.368 126.582 121.598  1.00  0.84           N
ATOM   3509  CA  THR A 223     215.092 125.274 121.028  1.00  0.84           C
ATOM   3510  C   THR A 223     214.135 124.489 121.912  1.00  0.84           C
ATOM   3511  O   THR A 223     213.652 123.422 121.538  1.00  0.84           O
ATOM   3512  CB  THR A 223     216.362 124.445 120.808  1.00  0.84           C
ATOM   3513  OG1 THR A 223     216.906 123.911 122.013  1.00  0.84           O
ATOM   3514  CG2 THR A 223     217.437 125.283 120.084  1.00  0.84           C
ATOM   3515  H   THR A 223     216.127 126.670 122.259  1.00  0.00           H
ATOM   3516  HA  THR A 223     214.613 125.422 120.060  1.00  0.00           H
ATOM   3517  HB  THR A 223     216.103 123.607 120.161  1.00  0.00           H
ATOM   3518  HG1 THR A 223     217.499 124.554 122.410  1.00  0.00           H
ATOM   3519 HG21 THR A 223     218.332 124.678 119.936  1.00  0.00           H
ATOM   3520 HG22 THR A 223     217.685 126.156 120.688  1.00  0.00           H
ATOM   3521 HG23 THR A 223     217.054 125.607 119.116  1.00  0.00           H
ATOM   3522  N   LYS A 224     213.791 125.006 123.115  1.00  0.79           N
ATOM   3523  CA  LYS A 224     212.986 124.286 124.099  1.00  0.79           C
ATOM   3524  C   LYS A 224     211.612 124.889 124.337  1.00  0.79           C
ATOM   3525  O   LYS A 224     210.862 124.412 125.187  1.00  0.79           O
ATOM   3526  CB  LYS A 224     213.702 124.169 125.462  1.00  0.79           C
ATOM   3527  CG  LYS A 224     215.087 123.521 125.360  1.00  0.79           C
ATOM   3528  CD  LYS A 224     215.115 122.022 125.018  1.00  0.79           C
ATOM   3529  CE  LYS A 224     216.517 121.527 124.629  1.00  0.79           C
ATOM   3530  NZ  LYS A 224     217.529 122.060 125.560  1.00  0.79           N
ATOM   3531  H   LYS A 224     214.107 125.937 123.344  1.00  0.00           H
ATOM   3532  HA  LYS A 224     212.837 123.275 123.721  1.00  0.00           H
ATOM   3533  HB2 LYS A 224     213.817 125.169 125.880  1.00  0.00           H
ATOM   3534  HB3 LYS A 224     213.084 123.575 126.135  1.00  0.00           H
ATOM   3535  HG2 LYS A 224     215.586 123.652 126.320  1.00  0.00           H
ATOM   3536  HG3 LYS A 224     215.659 124.055 124.602  1.00  0.00           H
ATOM   3537  HD2 LYS A 224     214.776 121.460 125.888  1.00  0.00           H
ATOM   3538  HD3 LYS A 224     214.432 121.836 124.189  1.00  0.00           H
ATOM   3539  HE2 LYS A 224     216.535 120.438 124.664  1.00  0.00           H
ATOM   3540  HE3 LYS A 224     216.748 121.859 123.617  1.00  0.00           H
ATOM   3541  HZ1 LYS A 224     217.375 121.674 126.481  1.00  0.00           H
ATOM   3542  HZ2 LYS A 224     218.451 121.804 125.237  1.00  0.00           H
ATOM   3543  HZ3 LYS A 224     217.454 123.066 125.600  1.00  0.00           H
ATOM   3544  N   CYS A 225     211.206 125.910 123.554  1.00  0.83           N
ATOM   3545  CA  CYS A 225     209.843 126.429 123.555  1.00  0.83           C
ATOM   3546  C   CYS A 225     208.809 125.379 123.154  1.00  0.83           C
ATOM   3547  O   CYS A 225     209.085 124.511 122.323  1.00  0.83           O
ATOM   3548  CB  CYS A 225     209.675 127.616 122.573  1.00  0.83           C
ATOM   3549  SG  CYS A 225     210.880 128.964 122.780  1.00  0.83           S
ATOM   3550  H   CYS A 225     211.881 126.337 122.935  1.00  0.00           H
ATOM   3551  HA  CYS A 225     209.608 126.778 124.561  1.00  0.00           H
ATOM   3552  HB2 CYS A 225     209.770 127.231 121.558  1.00  0.00           H
ATOM   3553  HB3 CYS A 225     208.673 128.026 122.695  1.00  0.00           H
ATOM   3554  HG  CYS A 225     211.747 128.947 121.763  1.00  0.00           H
ATOM   3555  N   VAL A 226     207.597 125.421 123.746  1.00  0.82           N
ATOM   3556  CA  VAL A 226     206.482 124.584 123.312  1.00  0.82           C
ATOM   3557  C   VAL A 226     205.796 125.163 122.085  1.00  0.82           C
ATOM   3558  O   VAL A 226     205.517 124.460 121.119  1.00  0.82           O
ATOM   3559  CB  VAL A 226     205.473 124.395 124.439  1.00  0.82           C
ATOM   3560  CG1 VAL A 226     204.238 123.601 123.966  1.00  0.82           C
ATOM   3561  CG2 VAL A 226     206.166 123.634 125.584  1.00  0.82           C
ATOM   3562  H   VAL A 226     207.456 126.056 124.519  1.00  0.00           H
ATOM   3563  HA  VAL A 226     206.879 123.604 123.046  1.00  0.00           H
ATOM   3564  HB  VAL A 226     205.153 125.372 124.801  1.00  0.00           H
ATOM   3565 HG11 VAL A 226     203.748 124.140 123.155  1.00  0.00           H
ATOM   3566 HG12 VAL A 226     203.542 123.483 124.797  1.00  0.00           H
ATOM   3567 HG13 VAL A 226     204.551 122.619 123.612  1.00  0.00           H
ATOM   3568 HG21 VAL A 226     205.461 123.487 126.402  1.00  0.00           H
ATOM   3569 HG22 VAL A 226     207.020 124.211 125.939  1.00  0.00           H
ATOM   3570 HG23 VAL A 226     206.508 122.665 125.221  1.00  0.00           H
ATOM   3571  N   ALA A 227     205.539 126.482 122.090  1.00  0.85           N
ATOM   3572  CA  ALA A 227     204.978 127.187 120.965  1.00  0.85           C
ATOM   3573  C   ALA A 227     205.782 128.455 120.768  1.00  0.85           C
ATOM   3574  O   ALA A 227     206.214 129.091 121.731  1.00  0.85           O
ATOM   3575  CB  ALA A 227     203.498 127.543 121.222  1.00  0.85           C
ATOM   3576  H   ALA A 227     205.750 127.007 122.926  1.00  0.00           H
ATOM   3577  HA  ALA A 227     205.053 126.566 120.072  1.00  0.00           H
ATOM   3578  HB1 ALA A 227     203.096 128.074 120.359  1.00  0.00           H
ATOM   3579  HB2 ALA A 227     202.927 126.628 121.383  1.00  0.00           H
ATOM   3580  HB3 ALA A 227     203.425 128.177 122.106  1.00  0.00           H
ATOM   3581  N   CYS A 228     206.037 128.837 119.503  1.00  0.83           N
ATOM   3582  CA  CYS A 228     206.754 130.059 119.193  1.00  0.83           C
ATOM   3583  C   CYS A 228     205.868 131.280 119.240  1.00  0.83           C
ATOM   3584  O   CYS A 228     204.720 131.274 118.793  1.00  0.83           O
ATOM   3585  CB  CYS A 228     207.425 130.026 117.799  1.00  0.83           C
ATOM   3586  SG  CYS A 228     208.633 128.683 117.659  1.00  0.83           S
ATOM   3587  H   CYS A 228     205.718 128.253 118.743  1.00  0.00           H
ATOM   3588  HA  CYS A 228     207.538 130.186 119.939  1.00  0.00           H
ATOM   3589  HB2 CYS A 228     206.654 129.886 117.041  1.00  0.00           H
ATOM   3590  HB3 CYS A 228     207.928 130.977 117.624  1.00  0.00           H
ATOM   3591  HG  CYS A 228     209.484 128.950 116.664  1.00  0.00           H
ATOM   3592  N   ARG A 229     206.409 132.383 119.785  1.00  0.75           N
ATOM   3593  CA  ARG A 229     205.731 133.658 119.800  1.00  0.75           C
ATOM   3594  C   ARG A 229     205.553 134.239 118.405  1.00  0.75           C
ATOM   3595  O   ARG A 229     204.430 134.445 117.936  1.00  0.75           O
ATOM   3596  CB  ARG A 229     206.573 134.615 120.674  1.00  0.75           C
ATOM   3597  CG  ARG A 229     205.968 136.010 120.865  1.00  0.75           C
ATOM   3598  CD  ARG A 229     206.870 136.901 121.716  1.00  0.75           C
ATOM   3599  NE  ARG A 229     206.117 138.188 121.848  1.00  0.75           N
ATOM   3600  CZ  ARG A 229     206.642 139.310 122.348  1.00  0.75           C
ATOM   3601  NH1 ARG A 229     207.911 139.358 122.738  1.00  0.75           N
ATOM   3602  NH2 ARG A 229     205.883 140.402 122.429  1.00  0.75           N
ATOM   3603  H   ARG A 229     207.327 132.318 120.201  1.00  0.00           H
ATOM   3604  HA  ARG A 229     204.750 133.532 120.258  1.00  0.00           H
ATOM   3605  HB2 ARG A 229     206.692 134.160 121.657  1.00  0.00           H
ATOM   3606  HB3 ARG A 229     207.558 134.723 120.220  1.00  0.00           H
ATOM   3607  HG2 ARG A 229     205.001 135.912 121.358  1.00  0.00           H
ATOM   3608  HG3 ARG A 229     205.826 136.474 119.889  1.00  0.00           H
ATOM   3609  HD2 ARG A 229     207.040 136.453 122.695  1.00  0.00           H
ATOM   3610  HD3 ARG A 229     207.820 137.070 121.209  1.00  0.00           H
ATOM   3611  HE  ARG A 229     205.155 138.209 121.541  1.00  0.00           H
ATOM   3612 HH11 ARG A 229     208.492 138.535 122.668  1.00  0.00           H
ATOM   3613 HH12 ARG A 229     208.295 140.218 123.104  1.00  0.00           H
ATOM   3614 HH21 ARG A 229     204.921 140.372 122.124  1.00  0.00           H
ATOM   3615 HH22 ARG A 229     206.270 141.260 122.795  1.00  0.00           H
ATOM   3616  N   ASN A 230     206.679 134.418 117.687  1.00  0.81           N
ATOM   3617  CA  ASN A 230     206.705 135.001 116.363  1.00  0.81           C
ATOM   3618  C   ASN A 230     206.723 133.891 115.317  1.00  0.81           C
ATOM   3619  O   ASN A 230     205.658 133.422 114.910  1.00  0.81           O
ATOM   3620  CB  ASN A 230     207.892 135.991 116.227  1.00  0.81           C
ATOM   3621  CG  ASN A 230     207.678 137.183 117.164  1.00  0.81           C
ATOM   3622  OD1 ASN A 230     206.574 137.713 117.308  1.00  0.81           O
ATOM   3623  ND2 ASN A 230     208.759 137.625 117.837  1.00  0.81           N
ATOM   3624  H   ASN A 230     207.556 134.128 118.097  1.00  0.00           H
ATOM   3625  HA  ASN A 230     205.783 135.567 116.231  1.00  0.00           H
ATOM   3626  HB2 ASN A 230     208.819 135.483 116.492  1.00  0.00           H
ATOM   3627  HB3 ASN A 230     207.953 136.345 115.198  1.00  0.00           H
ATOM   3628 HD21 ASN A 230     209.654 137.175 117.707  1.00  0.00           H
ATOM   3629 HD22 ASN A 230     208.674 138.406 118.471  1.00  0.00           H
ATOM   3630  N   PHE A 231     207.911 133.428 114.861  1.00  0.81           N
ATOM   3631  CA  PHE A 231     208.007 132.492 113.749  1.00  0.81           C
ATOM   3632  C   PHE A 231     208.715 131.197 114.115  1.00  0.81           C
ATOM   3633  O   PHE A 231     209.676 131.162 114.881  1.00  0.81           O
ATOM   3634  CB  PHE A 231     208.735 133.117 112.530  1.00  0.81           C
ATOM   3635  CG  PHE A 231     207.942 134.290 112.031  1.00  0.81           C
ATOM   3636  CD1 PHE A 231     206.819 134.092 111.212  1.00  0.81           C
ATOM   3637  CD2 PHE A 231     208.259 135.591 112.447  1.00  0.81           C
ATOM   3638  CE1 PHE A 231     206.000 135.169 110.852  1.00  0.81           C
ATOM   3639  CE2 PHE A 231     207.444 136.674 112.091  1.00  0.81           C
ATOM   3640  CZ  PHE A 231     206.308 136.460 111.299  1.00  0.81           C
ATOM   3641  H   PHE A 231     208.760 133.743 115.308  1.00  0.00           H
ATOM   3642  HA  PHE A 231     206.993 132.240 113.438  1.00  0.00           H
ATOM   3643  HB2 PHE A 231     209.729 133.450 112.830  1.00  0.00           H
ATOM   3644  HB3 PHE A 231     208.823 132.373 111.738  1.00  0.00           H
ATOM   3645  HD1 PHE A 231     206.585 133.100 110.856  1.00  0.00           H
ATOM   3646  HD2 PHE A 231     209.140 135.760 113.048  1.00  0.00           H
ATOM   3647  HE1 PHE A 231     205.132 135.004 110.231  1.00  0.00           H
ATOM   3648  HE2 PHE A 231     207.691 137.671 112.426  1.00  0.00           H
ATOM   3649  HZ  PHE A 231     205.670 137.290 111.033  1.00  0.00           H
ATOM   3650  N   TYR A 232     208.231 130.075 113.549  1.00  0.82           N
ATOM   3651  CA  TYR A 232     208.826 128.757 113.678  1.00  0.82           C
ATOM   3652  C   TYR A 232     209.718 128.432 112.478  1.00  0.82           C
ATOM   3653  O   TYR A 232     209.295 128.530 111.322  1.00  0.82           O
ATOM   3654  CB  TYR A 232     207.678 127.710 113.811  1.00  0.82           C
ATOM   3655  CG  TYR A 232     208.155 126.281 113.940  1.00  0.82           C
ATOM   3656  CD1 TYR A 232     208.515 125.739 115.185  1.00  0.82           C
ATOM   3657  CD2 TYR A 232     208.232 125.462 112.800  1.00  0.82           C
ATOM   3658  CE1 TYR A 232     208.929 124.402 115.292  1.00  0.82           C
ATOM   3659  CE2 TYR A 232     208.656 124.129 112.901  1.00  0.82           C
ATOM   3660  CZ  TYR A 232     208.999 123.597 114.150  1.00  0.82           C
ATOM   3661  OH  TYR A 232     209.419 122.253 114.249  1.00  0.82           O
ATOM   3662  H   TYR A 232     207.392 130.156 112.993  1.00  0.00           H
ATOM   3663  HA  TYR A 232     209.432 128.732 114.584  1.00  0.00           H
ATOM   3664  HB2 TYR A 232     207.092 127.956 114.697  1.00  0.00           H
ATOM   3665  HB3 TYR A 232     207.034 127.785 112.935  1.00  0.00           H
ATOM   3666  HD1 TYR A 232     208.473 126.358 116.069  1.00  0.00           H
ATOM   3667  HD2 TYR A 232     207.961 125.864 111.835  1.00  0.00           H
ATOM   3668  HE1 TYR A 232     209.194 123.995 116.257  1.00  0.00           H
ATOM   3669  HE2 TYR A 232     208.718 123.513 112.016  1.00  0.00           H
ATOM   3670  HH  TYR A 232     210.351 122.225 114.478  1.00  0.00           H
ATOM   3671  N   LEU A 233     210.972 128.009 112.746  1.00  0.85           N
ATOM   3672  CA  LEU A 233     211.882 127.475 111.749  1.00  0.85           C
ATOM   3673  C   LEU A 233     212.707 126.365 112.384  1.00  0.85           C
ATOM   3674  O   LEU A 233     213.389 126.580 113.382  1.00  0.85           O
ATOM   3675  CB  LEU A 233     212.811 128.601 111.229  1.00  0.85           C
ATOM   3676  CG  LEU A 233     213.901 128.194 110.213  1.00  0.85           C
ATOM   3677  CD1 LEU A 233     213.340 127.541 108.942  1.00  0.85           C
ATOM   3678  CD2 LEU A 233     214.729 129.427 109.825  1.00  0.85           C
ATOM   3679  H   LEU A 233     211.297 128.068 113.700  1.00  0.00           H
ATOM   3680  HA  LEU A 233     211.308 127.067 110.917  1.00  0.00           H
ATOM   3681  HB2 LEU A 233     212.182 129.353 110.753  1.00  0.00           H
ATOM   3682  HB3 LEU A 233     213.301 129.061 112.087  1.00  0.00           H
ATOM   3683  HG  LEU A 233     214.565 127.478 110.697  1.00  0.00           H
ATOM   3684 HD21 LEU A 233     215.130 129.894 110.725  1.00  0.00           H
ATOM   3685 HD22 LEU A 233     214.094 130.139 109.298  1.00  0.00           H
ATOM   3686 HD23 LEU A 233     215.551 129.123 109.177  1.00  0.00           H
ATOM   3687 HD11 LEU A 233     212.751 126.665 109.213  1.00  0.00           H
ATOM   3688 HD12 LEU A 233     214.164 127.239 108.295  1.00  0.00           H
ATOM   3689 HD13 LEU A 233     212.707 128.255 108.415  1.00  0.00           H
ATOM   3690  N   ASP A 234     212.656 125.138 111.824  1.00  0.83           N
ATOM   3691  CA  ASP A 234     213.473 123.982 112.176  1.00  0.83           C
ATOM   3692  C   ASP A 234     213.626 123.662 113.671  1.00  0.83           C
ATOM   3693  O   ASP A 234     214.723 123.436 114.180  1.00  0.83           O
ATOM   3694  CB  ASP A 234     214.846 124.039 111.459  1.00  0.83           C
ATOM   3695  CG  ASP A 234     214.681 124.353 109.981  1.00  0.83           C
ATOM   3696  OD1 ASP A 234     213.637 123.960 109.400  1.00  0.83           O
ATOM   3697  OD2 ASP A 234     215.590 125.033 109.435  1.00  0.83           O
ATOM   3698  H   ASP A 234     211.982 125.006 111.084  1.00  0.00           H
ATOM   3699  HA  ASP A 234     212.958 123.122 111.747  1.00  0.00           H
ATOM   3700  HB2 ASP A 234     215.342 123.074 111.564  1.00  0.00           H
ATOM   3701  HB3 ASP A 234     215.461 124.811 111.923  1.00  0.00           H
ATOM   3702  N   GLY A 235     212.506 123.644 114.431  1.00  0.83           N
ATOM   3703  CA  GLY A 235     212.520 123.368 115.869  1.00  0.83           C
ATOM   3704  C   GLY A 235     212.933 124.530 116.735  1.00  0.83           C
ATOM   3705  O   GLY A 235     213.070 124.396 117.949  1.00  0.83           O
ATOM   3706  H   GLY A 235     211.619 123.830 113.985  1.00  0.00           H
ATOM   3707  HA2 GLY A 235     213.215 122.548 116.049  1.00  0.00           H
ATOM   3708  HA3 GLY A 235     211.522 123.049 116.170  1.00  0.00           H
ATOM   3709  N   ARG A 236     213.153 125.705 116.124  1.00  0.78           N
ATOM   3710  CA  ARG A 236     213.606 126.901 116.788  1.00  0.78           C
ATOM   3711  C   ARG A 236     212.607 128.013 116.594  1.00  0.78           C
ATOM   3712  O   ARG A 236     212.006 128.181 115.532  1.00  0.78           O
ATOM   3713  CB  ARG A 236     214.951 127.395 116.203  1.00  0.78           C
ATOM   3714  CG  ARG A 236     216.069 126.344 116.302  1.00  0.78           C
ATOM   3715  CD  ARG A 236     217.437 126.829 115.820  1.00  0.78           C
ATOM   3716  NE  ARG A 236     217.347 126.986 114.326  1.00  0.78           N
ATOM   3717  CZ  ARG A 236     217.416 128.139 113.646  1.00  0.78           C
ATOM   3718  NH1 ARG A 236     217.605 129.305 114.257  1.00  0.78           N
ATOM   3719  NH2 ARG A 236     217.285 128.121 112.320  1.00  0.78           N
ATOM   3720  H   ARG A 236     212.989 125.754 115.129  1.00  0.00           H
ATOM   3721  HA  ARG A 236     213.725 126.702 117.853  1.00  0.00           H
ATOM   3722  HB2 ARG A 236     214.802 127.646 115.153  1.00  0.00           H
ATOM   3723  HB3 ARG A 236     215.261 128.292 116.740  1.00  0.00           H
ATOM   3724  HG2 ARG A 236     216.162 126.043 117.345  1.00  0.00           H
ATOM   3725  HG3 ARG A 236     215.781 125.473 115.713  1.00  0.00           H
ATOM   3726  HD2 ARG A 236     218.204 126.097 116.074  1.00  0.00           H
ATOM   3727  HD3 ARG A 236     217.673 127.789 116.280  1.00  0.00           H
ATOM   3728  HE  ARG A 236     217.223 126.143 113.784  1.00  0.00           H
ATOM   3729 HH11 ARG A 236     217.704 129.339 115.262  1.00  0.00           H
ATOM   3730 HH12 ARG A 236     217.650 130.157 113.716  1.00  0.00           H
ATOM   3731 HH21 ARG A 236     217.138 127.245 111.839  1.00  0.00           H
ATOM   3732 HH22 ARG A 236     217.332 128.983 111.796  1.00  0.00           H
ATOM   3733  N   CYS A 237     212.427 128.835 117.637  1.00  0.85           N
ATOM   3734  CA  CYS A 237     211.637 130.041 117.531  1.00  0.85           C
ATOM   3735  C   CYS A 237     212.529 131.211 117.183  1.00  0.85           C
ATOM   3736  O   CYS A 237     213.550 131.447 117.829  1.00  0.85           O
ATOM   3737  CB  CYS A 237     210.887 130.328 118.844  1.00  0.85           C
ATOM   3738  SG  CYS A 237     209.802 128.944 119.293  1.00  0.85           S
ATOM   3739  H   CYS A 237     212.855 128.605 118.522  1.00  0.00           H
ATOM   3740  HA  CYS A 237     210.906 129.910 116.733  1.00  0.00           H
ATOM   3741  HB2 CYS A 237     211.613 130.484 119.642  1.00  0.00           H
ATOM   3742  HB3 CYS A 237     210.287 131.230 118.724  1.00  0.00           H
ATOM   3743  HG  CYS A 237     210.096 128.530 120.529  1.00  0.00           H
ATOM   3744  N   VAL A 238     212.177 131.948 116.115  1.00  0.84           N
ATOM   3745  CA  VAL A 238     212.957 133.062 115.613  1.00  0.84           C
ATOM   3746  C   VAL A 238     212.071 134.285 115.443  1.00  0.84           C
ATOM   3747  O   VAL A 238     210.908 134.198 115.045  1.00  0.84           O
ATOM   3748  CB  VAL A 238     213.698 132.761 114.300  1.00  0.84           C
ATOM   3749  CG1 VAL A 238     214.783 131.691 114.548  1.00  0.84           C
ATOM   3750  CG2 VAL A 238     212.737 132.297 113.185  1.00  0.84           C
ATOM   3751  H   VAL A 238     211.320 131.712 115.635  1.00  0.00           H
ATOM   3752  HA  VAL A 238     213.708 133.303 116.366  1.00  0.00           H
ATOM   3753  HB  VAL A 238     214.190 133.675 113.968  1.00  0.00           H
ATOM   3754 HG21 VAL A 238     211.976 133.060 113.019  1.00  0.00           H
ATOM   3755 HG22 VAL A 238     213.299 132.138 112.264  1.00  0.00           H
ATOM   3756 HG23 VAL A 238     212.257 131.365 113.483  1.00  0.00           H
ATOM   3757 HG11 VAL A 238     215.306 131.480 113.615  1.00  0.00           H
ATOM   3758 HG12 VAL A 238     215.494 132.059 115.288  1.00  0.00           H
ATOM   3759 HG13 VAL A 238     214.315 130.778 114.917  1.00  0.00           H
ATOM   3760  N   GLU A 239     212.631 135.476 115.744  1.00  0.79           N
ATOM   3761  CA  GLU A 239     211.982 136.767 115.589  1.00  0.79           C
ATOM   3762  C   GLU A 239     211.636 137.093 114.140  1.00  0.79           C
ATOM   3763  O   GLU A 239     210.581 137.638 113.819  1.00  0.79           O
ATOM   3764  CB  GLU A 239     212.901 137.861 116.174  1.00  0.79           C
ATOM   3765  CG  GLU A 239     212.230 139.250 116.306  1.00  0.79           C
ATOM   3766  CD  GLU A 239     213.203 140.321 116.797  1.00  0.79           C
ATOM   3767  OE1 GLU A 239     214.415 140.013 116.941  1.00  0.79           O
ATOM   3768  OE2 GLU A 239     212.733 141.469 117.006  1.00  0.79           O
ATOM   3769  H   GLU A 239     213.574 135.469 116.105  1.00  0.00           H
ATOM   3770  HA  GLU A 239     211.057 136.755 116.166  1.00  0.00           H
ATOM   3771  HB2 GLU A 239     213.224 137.542 117.165  1.00  0.00           H
ATOM   3772  HB3 GLU A 239     213.779 137.957 115.535  1.00  0.00           H
ATOM   3773  HG2 GLU A 239     211.845 139.547 115.330  1.00  0.00           H
ATOM   3774  HG3 GLU A 239     211.399 139.177 117.008  1.00  0.00           H
ATOM   3775  N   THR A 240     212.524 136.724 113.197  1.00  0.83           N
ATOM   3776  CA  THR A 240     212.271 136.884 111.775  1.00  0.83           C
ATOM   3777  C   THR A 240     212.887 135.719 111.026  1.00  0.83           C
ATOM   3778  O   THR A 240     213.753 135.013 111.544  1.00  0.83           O
ATOM   3779  CB  THR A 240     212.778 138.215 111.219  1.00  0.83           C
ATOM   3780  OG1 THR A 240     212.277 138.460 109.908  1.00  0.83           O
ATOM   3781  CG2 THR A 240     214.315 138.271 111.173  1.00  0.83           C
ATOM   3782  H   THR A 240     213.402 136.319 113.490  1.00  0.00           H
ATOM   3783  HA  THR A 240     211.193 136.847 111.621  1.00  0.00           H
ATOM   3784  HB  THR A 240     212.427 139.013 111.873  1.00  0.00           H
ATOM   3785  HG1 THR A 240     211.413 138.053 109.814  1.00  0.00           H
ATOM   3786 HG21 THR A 240     214.632 139.234 110.772  1.00  0.00           H
ATOM   3787 HG22 THR A 240     214.713 138.149 112.180  1.00  0.00           H
ATOM   3788 HG23 THR A 240     214.689 137.470 110.535  1.00  0.00           H
ATOM   3789  N   CYS A 241     212.446 135.472 109.777  1.00  0.84           N
ATOM   3790  CA  CYS A 241     212.969 134.424 108.920  1.00  0.84           C
ATOM   3791  C   CYS A 241     214.282 134.860 108.260  1.00  0.84           C
ATOM   3792  O   CYS A 241     214.299 135.908 107.613  1.00  0.84           O
ATOM   3793  CB  CYS A 241     211.966 134.046 107.797  1.00  0.84           C
ATOM   3794  SG  CYS A 241     210.341 133.521 108.436  1.00  0.84           S
ATOM   3795  H   CYS A 241     211.704 136.053 109.414  1.00  0.00           H
ATOM   3796  HA  CYS A 241     213.161 133.540 109.528  1.00  0.00           H
ATOM   3797  HB2 CYS A 241     211.822 134.914 107.154  1.00  0.00           H
ATOM   3798  HB3 CYS A 241     212.390 133.235 107.204  1.00  0.00           H
ATOM   3799  HG  CYS A 241     209.401 134.373 108.017  1.00  0.00           H
ATOM   3800  N   PRO A 242     215.407 134.156 108.379  1.00  0.82           N
ATOM   3801  CA  PRO A 242     216.621 134.496 107.645  1.00  0.82           C
ATOM   3802  C   PRO A 242     216.526 134.035 106.186  1.00  0.82           C
ATOM   3803  O   PRO A 242     215.909 132.991 105.962  1.00  0.82           O
ATOM   3804  CB  PRO A 242     217.721 133.733 108.405  1.00  0.82           C
ATOM   3805  CG  PRO A 242     217.004 132.508 108.980  1.00  0.82           C
ATOM   3806  CD  PRO A 242     215.613 133.050 109.314  1.00  0.82           C
ATOM   3807  HA  PRO A 242     216.804 135.570 107.692  1.00  0.00           H
ATOM   3808  HB2 PRO A 242     218.519 133.430 107.727  1.00  0.00           H
ATOM   3809  HB3 PRO A 242     218.122 134.349 109.210  1.00  0.00           H
ATOM   3810  HG2 PRO A 242     216.946 131.707 108.243  1.00  0.00           H
ATOM   3811  HG3 PRO A 242     217.506 132.161 109.883  1.00  0.00           H
ATOM   3812  HD2 PRO A 242     215.577 133.406 110.344  1.00  0.00           H
ATOM   3813  HD3 PRO A 242     214.860 132.278 109.156  1.00  0.00           H
ATOM   3814  N   PRO A 243     217.063 134.715 105.172  1.00  0.78           N
ATOM   3815  CA  PRO A 243     217.217 134.175 103.819  1.00  0.78           C
ATOM   3816  C   PRO A 243     217.837 132.774 103.757  1.00  0.78           C
ATOM   3817  O   PRO A 243     218.828 132.578 104.463  1.00  0.78           O
ATOM   3818  CB  PRO A 243     218.080 135.219 103.086  1.00  0.78           C
ATOM   3819  CG  PRO A 243     217.847 136.511 103.873  1.00  0.78           C
ATOM   3820  CD  PRO A 243     217.720 136.012 105.310  1.00  0.78           C
ATOM   3821  HA  PRO A 243     216.236 134.141 103.345  1.00  0.00           H
ATOM   3822  HB2 PRO A 243     217.756 135.332 102.051  1.00  0.00           H
ATOM   3823  HB3 PRO A 243     219.132 134.936 103.125  1.00  0.00           H
ATOM   3824  HG2 PRO A 243     218.691 137.193 103.767  1.00  0.00           H
ATOM   3825  HG3 PRO A 243     216.923 136.993 103.552  1.00  0.00           H
ATOM   3826  HD2 PRO A 243     217.112 136.694 105.905  1.00  0.00           H
ATOM   3827  HD3 PRO A 243     218.706 135.892 105.759  1.00  0.00           H
ATOM   3828  N   PRO A 244     217.359 131.792 102.999  1.00  0.80           N
ATOM   3829  CA  PRO A 244     216.411 131.952 101.899  1.00  0.80           C
ATOM   3830  C   PRO A 244     215.044 131.449 102.334  1.00  0.80           C
ATOM   3831  O   PRO A 244     214.356 130.783 101.557  1.00  0.80           O
ATOM   3832  CB  PRO A 244     217.020 131.029 100.830  1.00  0.80           C
ATOM   3833  CG  PRO A 244     217.585 129.857 101.637  1.00  0.80           C
ATOM   3834  CD  PRO A 244     218.131 130.550 102.885  1.00  0.80           C
ATOM   3835  HA  PRO A 244     216.366 132.986 101.557  1.00  0.00           H
ATOM   3836  HB2 PRO A 244     217.811 131.540 100.282  1.00  0.00           H
ATOM   3837  HB3 PRO A 244     216.247 130.680 100.145  1.00  0.00           H
ATOM   3838  HG2 PRO A 244     216.803 129.142 101.893  1.00  0.00           H
ATOM   3839  HG3 PRO A 244     218.389 129.366 101.088  1.00  0.00           H
ATOM   3840  HD2 PRO A 244     219.192 130.768 102.768  1.00  0.00           H
ATOM   3841  HD3 PRO A 244     217.970 129.925 103.763  1.00  0.00           H
ATOM   3842  N   TYR A 245     214.605 131.794 103.556  1.00  0.80           N
ATOM   3843  CA  TYR A 245     213.303 131.431 104.058  1.00  0.80           C
ATOM   3844  C   TYR A 245     212.406 132.656 104.101  1.00  0.80           C
ATOM   3845  O   TYR A 245     212.822 133.763 104.431  1.00  0.80           O
ATOM   3846  CB  TYR A 245     213.382 130.818 105.474  1.00  0.80           C
ATOM   3847  CG  TYR A 245     214.169 129.542 105.464  1.00  0.80           C
ATOM   3848  CD1 TYR A 245     213.539 128.329 105.143  1.00  0.80           C
ATOM   3849  CD2 TYR A 245     215.532 129.536 105.804  1.00  0.80           C
ATOM   3850  CE1 TYR A 245     214.255 127.124 105.182  1.00  0.80           C
ATOM   3851  CE2 TYR A 245     216.251 128.333 105.836  1.00  0.80           C
ATOM   3852  CZ  TYR A 245     215.609 127.128 105.534  1.00  0.80           C
ATOM   3853  OH  TYR A 245     216.320 125.916 105.613  1.00  0.80           O
ATOM   3854  H   TYR A 245     215.217 132.334 104.152  1.00  0.00           H
ATOM   3855  HA  TYR A 245     212.861 130.698 103.384  1.00  0.00           H
ATOM   3856  HB2 TYR A 245     213.865 131.529 106.144  1.00  0.00           H
ATOM   3857  HB3 TYR A 245     212.373 130.615 105.834  1.00  0.00           H
ATOM   3858  HD1 TYR A 245     212.496 128.324 104.864  1.00  0.00           H
ATOM   3859  HD2 TYR A 245     216.029 130.465 106.042  1.00  0.00           H
ATOM   3860  HE1 TYR A 245     213.762 126.194 104.941  1.00  0.00           H
ATOM   3861  HE2 TYR A 245     217.300 128.337 106.094  1.00  0.00           H
ATOM   3862  HH  TYR A 245     216.641 125.791 106.509  1.00  0.00           H
ATOM   3863  N   TYR A 246     211.132 132.455 103.741  1.00  0.84           N
ATOM   3864  CA  TYR A 246     210.124 133.472 103.558  1.00  0.84           C
ATOM   3865  C   TYR A 246     209.002 133.225 104.551  1.00  0.84           C
ATOM   3866  O   TYR A 246     208.622 132.082 104.811  1.00  0.84           O
ATOM   3867  CB  TYR A 246     209.514 133.378 102.132  1.00  0.84           C
ATOM   3868  CG  TYR A 246     210.562 133.575 101.068  1.00  0.84           C
ATOM   3869  CD1 TYR A 246     211.198 134.817 100.923  1.00  0.84           C
ATOM   3870  CD2 TYR A 246     210.912 132.530 100.195  1.00  0.84           C
ATOM   3871  CE1 TYR A 246     212.138 135.030  99.907  1.00  0.84           C
ATOM   3872  CE2 TYR A 246     211.867 132.734  99.188  1.00  0.84           C
ATOM   3873  CZ  TYR A 246     212.470 133.987  99.038  1.00  0.84           C
ATOM   3874  OH  TYR A 246     213.420 134.201  98.020  1.00  0.84           O
ATOM   3875  H   TYR A 246     210.849 131.499 103.582  1.00  0.00           H
ATOM   3876  HA  TYR A 246     210.555 134.460 103.717  1.00  0.00           H
ATOM   3877  HB2 TYR A 246     209.061 132.395 102.005  1.00  0.00           H
ATOM   3878  HB3 TYR A 246     208.745 134.142 102.022  1.00  0.00           H
ATOM   3879  HD1 TYR A 246     210.959 135.620 101.604  1.00  0.00           H
ATOM   3880  HD2 TYR A 246     210.442 131.563 100.300  1.00  0.00           H
ATOM   3881  HE1 TYR A 246     212.605 135.997  99.795  1.00  0.00           H
ATOM   3882  HE2 TYR A 246     212.137 131.923  98.528  1.00  0.00           H
ATOM   3883  HH  TYR A 246     214.258 134.455  98.413  1.00  0.00           H
ATOM   3884  N   HIS A 247     208.445 134.284 105.169  1.00  0.82           N
ATOM   3885  CA  HIS A 247     207.329 134.163 106.096  1.00  0.82           C
ATOM   3886  C   HIS A 247     206.037 133.652 105.446  1.00  0.82           C
ATOM   3887  O   HIS A 247     205.684 134.030 104.327  1.00  0.82           O
ATOM   3888  CB  HIS A 247     207.015 135.494 106.832  1.00  0.82           C
ATOM   3889  CG  HIS A 247     208.215 136.256 107.335  1.00  0.82           C
ATOM   3890  ND1 HIS A 247     208.964 136.984 106.434  1.00  0.82           N
ATOM   3891  CD2 HIS A 247     208.716 136.413 108.590  1.00  0.82           C
ATOM   3892  CE1 HIS A 247     209.906 137.565 107.150  1.00  0.82           C
ATOM   3893  NE2 HIS A 247     209.802 137.256 108.464  1.00  0.82           N
ATOM   3894  H   HIS A 247     208.818 135.203 104.981  1.00  0.00           H
ATOM   3895  HA  HIS A 247     207.618 133.436 106.855  1.00  0.00           H
ATOM   3896  HB2 HIS A 247     206.381 135.263 107.688  1.00  0.00           H
ATOM   3897  HB3 HIS A 247     206.457 136.139 106.154  1.00  0.00           H
ATOM   3898  HD2 HIS A 247     208.341 135.969 109.500  1.00  0.00           H
ATOM   3899  HE1 HIS A 247     210.669 138.210 106.738  1.00  0.00           H
ATOM   3900  HD1 HIS A 247     208.821 137.057 105.437  1.00  0.00           H
ATOM   3901  N   PHE A 248     205.284 132.784 106.152  1.00  0.81           N
ATOM   3902  CA  PHE A 248     204.076 132.159 105.644  1.00  0.81           C
ATOM   3903  C   PHE A 248     203.023 132.082 106.751  1.00  0.81           C
ATOM   3904  O   PHE A 248     203.309 131.698 107.888  1.00  0.81           O
ATOM   3905  CB  PHE A 248     204.427 130.746 105.102  1.00  0.81           C
ATOM   3906  CG  PHE A 248     203.268 130.013 104.467  1.00  0.81           C
ATOM   3907  CD1 PHE A 248     202.754 130.405 103.219  1.00  0.81           C
ATOM   3908  CD2 PHE A 248     202.693 128.906 105.113  1.00  0.81           C
ATOM   3909  CE1 PHE A 248     201.715 129.686 102.612  1.00  0.81           C
ATOM   3910  CE2 PHE A 248     201.642 128.194 104.520  1.00  0.81           C
ATOM   3911  CZ  PHE A 248     201.161 128.578 103.263  1.00  0.81           C
ATOM   3912  H   PHE A 248     205.578 132.555 107.091  1.00  0.00           H
ATOM   3913  HA  PHE A 248     203.684 132.763 104.826  1.00  0.00           H
ATOM   3914  HB2 PHE A 248     205.212 130.854 104.354  1.00  0.00           H
ATOM   3915  HB3 PHE A 248     204.811 130.143 105.925  1.00  0.00           H
ATOM   3916  HD1 PHE A 248     203.165 131.271 102.721  1.00  0.00           H
ATOM   3917  HD2 PHE A 248     203.066 128.600 106.079  1.00  0.00           H
ATOM   3918  HE1 PHE A 248     201.343 129.987 101.644  1.00  0.00           H
ATOM   3919  HE2 PHE A 248     201.204 127.350 105.032  1.00  0.00           H
ATOM   3920  HZ  PHE A 248     200.363 128.020 102.796  1.00  0.00           H
ATOM   3921  N   GLN A 249     201.780 132.513 106.417  1.00  0.72           N
ATOM   3922  CA  GLN A 249     200.554 132.487 107.222  1.00  0.72           C
ATOM   3923  C   GLN A 249     200.622 133.119 108.615  1.00  0.72           C
ATOM   3924  O   GLN A 249     199.772 132.867 109.467  1.00  0.72           O
ATOM   3925  CB  GLN A 249     199.906 131.076 107.277  1.00  0.72           C
ATOM   3926  CG  GLN A 249     199.431 130.520 105.909  1.00  0.72           C
ATOM   3927  CD  GLN A 249     198.250 131.266 105.273  1.00  0.72           C
ATOM   3928  OE1 GLN A 249     197.336 131.802 105.907  1.00  0.72           O
ATOM   3929  NE2 GLN A 249     198.240 131.271 103.918  1.00  0.72           N
ATOM   3930  H   GLN A 249     201.687 132.904 105.490  1.00  0.00           H
ATOM   3931  HA  GLN A 249     199.843 133.101 106.670  1.00  0.00           H
ATOM   3932  HB2 GLN A 249     200.640 130.383 107.687  1.00  0.00           H
ATOM   3933  HB3 GLN A 249     199.050 131.114 107.951  1.00  0.00           H
ATOM   3934  HG2 GLN A 249     200.271 130.567 105.216  1.00  0.00           H
ATOM   3935  HG3 GLN A 249     199.149 129.475 106.040  1.00  0.00           H
ATOM   3936 HE21 GLN A 249     198.983 130.818 103.406  1.00  0.00           H
ATOM   3937 HE22 GLN A 249     197.489 131.728 103.420  1.00  0.00           H
ATOM   3938  N   ASP A 250     201.623 133.988 108.856  1.00  0.75           N
ATOM   3939  CA  ASP A 250     201.862 134.689 110.102  1.00  0.75           C
ATOM   3940  C   ASP A 250     202.186 133.773 111.300  1.00  0.75           C
ATOM   3941  O   ASP A 250     201.802 134.010 112.451  1.00  0.75           O
ATOM   3942  CB  ASP A 250     200.726 135.729 110.353  1.00  0.75           C
ATOM   3943  CG  ASP A 250     201.245 137.131 110.632  1.00  0.75           C
ATOM   3944  OD1 ASP A 250     202.481 137.348 110.551  1.00  0.75           O
ATOM   3945  OD2 ASP A 250     200.384 138.019 110.862  1.00  0.75           O
ATOM   3946  H   ASP A 250     202.266 134.168 108.098  1.00  0.00           H
ATOM   3947  HA  ASP A 250     202.764 135.278 109.935  1.00  0.00           H
ATOM   3948  HB2 ASP A 250     200.089 135.765 109.469  1.00  0.00           H
ATOM   3949  HB3 ASP A 250     200.129 135.399 111.203  1.00  0.00           H
ATOM   3950  N   TRP A 251     202.962 132.688 111.045  1.00  0.75           N
ATOM   3951  CA  TRP A 251     203.454 131.826 112.112  1.00  0.75           C
ATOM   3952  C   TRP A 251     204.673 130.970 111.760  1.00  0.75           C
ATOM   3953  O   TRP A 251     205.306 130.399 112.651  1.00  0.75           O
ATOM   3954  CB  TRP A 251     202.329 130.871 112.629  1.00  0.75           C
ATOM   3955  CG  TRP A 251     201.887 129.744 111.697  1.00  0.75           C
ATOM   3956  CD1 TRP A 251     201.052 129.784 110.614  1.00  0.75           C
ATOM   3957  CD2 TRP A 251     202.308 128.372 111.827  1.00  0.75           C
ATOM   3958  NE1 TRP A 251     200.922 128.523 110.068  1.00  0.75           N
ATOM   3959  CE2 TRP A 251     201.656 127.644 110.813  1.00  0.75           C
ATOM   3960  CE3 TRP A 251     203.172 127.739 112.719  1.00  0.75           C
ATOM   3961  CZ2 TRP A 251     201.834 126.275 110.683  1.00  0.75           C
ATOM   3962  CZ3 TRP A 251     203.362 126.356 112.578  1.00  0.75           C
ATOM   3963  CH2 TRP A 251     202.696 125.630 111.581  1.00  0.75           C
ATOM   3964  H   TRP A 251     203.205 132.472 110.089  1.00  0.00           H
ATOM   3965  HA  TRP A 251     203.740 132.470 112.943  1.00  0.00           H
ATOM   3966  HB2 TRP A 251     201.452 131.483 112.843  1.00  0.00           H
ATOM   3967  HB3 TRP A 251     202.667 130.425 113.564  1.00  0.00           H
ATOM   3968  HD1 TRP A 251     200.565 130.673 110.241  1.00  0.00           H
ATOM   3969  HE3 TRP A 251     203.679 128.295 113.494  1.00  0.00           H
ATOM   3970  HZ2 TRP A 251     201.322 125.720 109.910  1.00  0.00           H
ATOM   3971  HZ3 TRP A 251     204.033 125.842 113.250  1.00  0.00           H
ATOM   3972  HH2 TRP A 251     202.848 124.564 111.504  1.00  0.00           H
ATOM   3973  HE1 TRP A 251     200.375 128.289 109.252  1.00  0.00           H
ATOM   3974  N   ARG A 252     205.095 130.867 110.482  1.00  0.76           N
ATOM   3975  CA  ARG A 252     206.241 130.031 110.172  1.00  0.76           C
ATOM   3976  C   ARG A 252     207.031 130.530 108.989  1.00  0.76           C
ATOM   3977  O   ARG A 252     206.602 131.405 108.240  1.00  0.76           O
ATOM   3978  CB  ARG A 252     205.858 128.542 109.959  1.00  0.76           C
ATOM   3979  CG  ARG A 252     204.868 128.243 108.811  1.00  0.76           C
ATOM   3980  CD  ARG A 252     204.686 126.730 108.641  1.00  0.76           C
ATOM   3981  NE  ARG A 252     203.537 126.441 107.720  1.00  0.76           N
ATOM   3982  CZ  ARG A 252     203.399 125.291 107.053  1.00  0.76           C
ATOM   3983  NH1 ARG A 252     204.295 124.312 107.145  1.00  0.76           N
ATOM   3984  NH2 ARG A 252     202.317 125.075 106.320  1.00  0.76           N
ATOM   3985  H   ARG A 252     204.617 131.368 109.747  1.00  0.00           H
ATOM   3986  HA  ARG A 252     206.905 130.068 111.036  1.00  0.00           H
ATOM   3987  HB2 ARG A 252     205.411 128.179 110.885  1.00  0.00           H
ATOM   3988  HB3 ARG A 252     206.772 127.977 109.777  1.00  0.00           H
ATOM   3989  HG2 ARG A 252     203.904 128.697 109.041  1.00  0.00           H
ATOM   3990  HG3 ARG A 252     205.253 128.666 107.883  1.00  0.00           H
ATOM   3991  HD2 ARG A 252     204.488 126.281 109.614  1.00  0.00           H
ATOM   3992  HD3 ARG A 252     205.598 126.302 108.225  1.00  0.00           H
ATOM   3993  HE  ARG A 252     202.831 127.153 107.598  1.00  0.00           H
ATOM   3994 HH11 ARG A 252     205.120 124.435 107.714  1.00  0.00           H
ATOM   3995 HH12 ARG A 252     204.150 123.446 106.646  1.00  0.00           H
ATOM   3996 HH21 ARG A 252     201.606 125.788 106.247  1.00  0.00           H
ATOM   3997 HH22 ARG A 252     202.203 124.197 105.834  1.00  0.00           H
ATOM   3998  N   CYS A 253     208.242 129.971 108.826  1.00  0.87           N
ATOM   3999  CA  CYS A 253     209.149 130.285 107.746  1.00  0.87           C
ATOM   4000  C   CYS A 253     209.190 129.103 106.787  1.00  0.87           C
ATOM   4001  O   CYS A 253     209.281 127.955 107.216  1.00  0.87           O
ATOM   4002  CB  CYS A 253     210.583 130.504 108.295  1.00  0.87           C
ATOM   4003  SG  CYS A 253     210.720 131.847 109.513  1.00  0.87           S
ATOM   4004  H   CYS A 253     208.538 129.284 109.505  1.00  0.00           H
ATOM   4005  HA  CYS A 253     208.810 131.179 107.222  1.00  0.00           H
ATOM   4006  HB2 CYS A 253     210.912 129.579 108.768  1.00  0.00           H
ATOM   4007  HB3 CYS A 253     211.247 130.723 107.459  1.00  0.00           H
ATOM   4008  HG  CYS A 253     210.581 131.348 110.745  1.00  0.00           H
ATOM   4009  N   VAL A 254     209.106 129.343 105.462  1.00  0.89           N
ATOM   4010  CA  VAL A 254     209.160 128.292 104.447  1.00  0.89           C
ATOM   4011  C   VAL A 254     210.085 128.733 103.330  1.00  0.89           C
ATOM   4012  O   VAL A 254     210.396 129.909 103.190  1.00  0.89           O
ATOM   4013  CB  VAL A 254     207.802 127.938 103.833  1.00  0.89           C
ATOM   4014  CG1 VAL A 254     206.872 127.374 104.925  1.00  0.89           C
ATOM   4015  CG2 VAL A 254     207.163 129.160 103.141  1.00  0.89           C
ATOM   4016  H   VAL A 254     209.000 130.299 105.155  1.00  0.00           H
ATOM   4017  HA  VAL A 254     209.576 127.394 104.904  1.00  0.00           H
ATOM   4018  HB  VAL A 254     207.958 127.163 103.083  1.00  0.00           H
ATOM   4019 HG11 VAL A 254     205.906 127.123 104.486  1.00  0.00           H
ATOM   4020 HG12 VAL A 254     206.733 128.122 105.705  1.00  0.00           H
ATOM   4021 HG13 VAL A 254     207.319 126.478 105.356  1.00  0.00           H
ATOM   4022 HG21 VAL A 254     207.839 129.539 102.375  1.00  0.00           H
ATOM   4023 HG22 VAL A 254     206.221 128.864 102.680  1.00  0.00           H
ATOM   4024 HG23 VAL A 254     206.977 129.940 103.880  1.00  0.00           H
ATOM   4025  N   ASN A 255     210.590 127.808 102.493  1.00  0.84           N
ATOM   4026  CA  ASN A 255     211.467 128.162 101.388  1.00  0.84           C
ATOM   4027  C   ASN A 255     210.693 128.450 100.097  1.00  0.84           C
ATOM   4028  O   ASN A 255     209.465 128.382 100.041  1.00  0.84           O
ATOM   4029  CB  ASN A 255     212.619 127.130 101.217  1.00  0.84           C
ATOM   4030  CG  ASN A 255     212.125 125.720 100.902  1.00  0.84           C
ATOM   4031  OD1 ASN A 255     210.978 125.482 100.524  1.00  0.84           O
ATOM   4032  ND2 ASN A 255     213.037 124.734 101.056  1.00  0.84           N
ATOM   4033  H   ASN A 255     210.352 126.837 102.637  1.00  0.00           H
ATOM   4034  HA  ASN A 255     211.943 129.101 101.670  1.00  0.00           H
ATOM   4035  HB2 ASN A 255     213.262 127.461 100.402  1.00  0.00           H
ATOM   4036  HB3 ASN A 255     213.204 127.100 102.136  1.00  0.00           H
ATOM   4037 HD21 ASN A 255     213.973 124.955 101.364  1.00  0.00           H
ATOM   4038 HD22 ASN A 255     212.782 123.776 100.863  1.00  0.00           H
ATOM   4039  N   PHE A 256     211.420 128.804  99.013  1.00  0.84           N
ATOM   4040  CA  PHE A 256     210.853 129.117  97.706  1.00  0.84           C
ATOM   4041  C   PHE A 256     210.000 127.992  97.112  1.00  0.84           C
ATOM   4042  O   PHE A 256     208.878 128.223  96.664  1.00  0.84           O
ATOM   4043  CB  PHE A 256     212.023 129.464  96.734  1.00  0.84           C
ATOM   4044  CG  PHE A 256     211.542 129.971  95.396  1.00  0.84           C
ATOM   4045  CD1 PHE A 256     211.037 131.275  95.256  1.00  0.84           C
ATOM   4046  CD2 PHE A 256     211.574 129.133  94.268  1.00  0.84           C
ATOM   4047  CE1 PHE A 256     210.573 131.733  94.013  1.00  0.84           C
ATOM   4048  CE2 PHE A 256     211.112 129.587  93.027  1.00  0.84           C
ATOM   4049  CZ  PHE A 256     210.609 130.886  92.898  1.00  0.84           C
ATOM   4050  H   PHE A 256     212.424 128.855  99.115  1.00  0.00           H
ATOM   4051  HA  PHE A 256     210.224 130.001  97.811  1.00  0.00           H
ATOM   4052  HB2 PHE A 256     212.642 130.233  97.195  1.00  0.00           H
ATOM   4053  HB3 PHE A 256     212.628 128.571  96.577  1.00  0.00           H
ATOM   4054  HD1 PHE A 256     211.006 131.931  96.113  1.00  0.00           H
ATOM   4055  HD2 PHE A 256     211.959 128.128  94.360  1.00  0.00           H
ATOM   4056  HE1 PHE A 256     210.189 132.738  93.916  1.00  0.00           H
ATOM   4057  HE2 PHE A 256     211.144 128.933  92.168  1.00  0.00           H
ATOM   4058  HZ  PHE A 256     210.249 131.235  91.941  1.00  0.00           H
ATOM   4059  N   SER A 257     210.497 126.739  97.142  1.00  0.88           N
ATOM   4060  CA  SER A 257     209.854 125.586  96.529  1.00  0.88           C
ATOM   4061  C   SER A 257     208.496 125.260  97.097  1.00  0.88           C
ATOM   4062  O   SER A 257     207.557 124.993  96.360  1.00  0.88           O
ATOM   4063  CB  SER A 257     210.718 124.313  96.648  1.00  0.88           C
ATOM   4064  OG  SER A 257     212.061 124.603  96.252  1.00  0.88           O
ATOM   4065  H   SER A 257     211.373 126.591  97.622  1.00  0.00           H
ATOM   4066  HA  SER A 257     209.727 125.802  95.468  1.00  0.00           H
ATOM   4067  HB2 SER A 257     210.310 123.536  96.001  1.00  0.00           H
ATOM   4068  HB3 SER A 257     210.711 123.965  97.681  1.00  0.00           H
ATOM   4069  HG  SER A 257     212.596 123.809  96.327  1.00  0.00           H
ATOM   4070  N   PHE A 258     208.329 125.342  98.433  1.00  0.84           N
ATOM   4071  CA  PHE A 258     207.043 125.122  99.077  1.00  0.84           C
ATOM   4072  C   PHE A 258     205.968 126.120  98.617  1.00  0.84           C
ATOM   4073  O   PHE A 258     204.835 125.753  98.313  1.00  0.84           O
ATOM   4074  CB  PHE A 258     207.245 125.182 100.619  1.00  0.84           C
ATOM   4075  CG  PHE A 258     205.978 124.878 101.380  1.00  0.84           C
ATOM   4076  CD1 PHE A 258     205.525 123.556 101.528  1.00  0.84           C
ATOM   4077  CD2 PHE A 258     205.208 125.922 101.919  1.00  0.84           C
ATOM   4078  CE1 PHE A 258     204.328 123.284 102.205  1.00  0.84           C
ATOM   4079  CE2 PHE A 258     204.016 125.655 102.602  1.00  0.84           C
ATOM   4080  CZ  PHE A 258     203.572 124.335 102.742  1.00  0.84           C
ATOM   4081  H   PHE A 258     209.128 125.565  99.009  1.00  0.00           H
ATOM   4082  HA  PHE A 258     206.704 124.118  98.820  1.00  0.00           H
ATOM   4083  HB2 PHE A 258     207.583 126.183 100.888  1.00  0.00           H
ATOM   4084  HB3 PHE A 258     208.011 124.461 100.904  1.00  0.00           H
ATOM   4085  HD1 PHE A 258     206.104 122.742 101.117  1.00  0.00           H
ATOM   4086  HD2 PHE A 258     205.540 126.943 101.805  1.00  0.00           H
ATOM   4087  HE1 PHE A 258     203.988 122.264 102.313  1.00  0.00           H
ATOM   4088  HE2 PHE A 258     203.439 126.467 103.021  1.00  0.00           H
ATOM   4089  HZ  PHE A 258     202.649 124.127 103.263  1.00  0.00           H
ATOM   4090  N   CYS A 259     206.321 127.421  98.506  1.00  0.87           N
ATOM   4091  CA  CYS A 259     205.435 128.448  97.967  1.00  0.87           C
ATOM   4092  C   CYS A 259     205.096 128.196  96.493  1.00  0.87           C
ATOM   4093  O   CYS A 259     203.952 128.341  96.058  1.00  0.87           O
ATOM   4094  CB  CYS A 259     206.067 129.856  98.174  1.00  0.87           C
ATOM   4095  SG  CYS A 259     204.956 131.275  97.850  1.00  0.87           S
ATOM   4096  H   CYS A 259     207.244 127.695  98.811  1.00  0.00           H
ATOM   4097  HA  CYS A 259     204.504 128.415  98.533  1.00  0.00           H
ATOM   4098  HB2 CYS A 259     206.405 129.924  99.208  1.00  0.00           H
ATOM   4099  HB3 CYS A 259     206.936 129.943  97.522  1.00  0.00           H
ATOM   4100  HG  CYS A 259     205.183 131.747  96.621  1.00  0.00           H
ATOM   4101  N   GLN A 260     206.094 127.757  95.697  1.00  0.81           N
ATOM   4102  CA  GLN A 260     205.930 127.356  94.311  1.00  0.81           C
ATOM   4103  C   GLN A 260     205.006 126.152  94.112  1.00  0.81           C
ATOM   4104  O   GLN A 260     204.095 126.190  93.285  1.00  0.81           O
ATOM   4105  CB  GLN A 260     207.318 127.082  93.685  1.00  0.81           C
ATOM   4106  CG  GLN A 260     207.267 126.833  92.164  1.00  0.81           C
ATOM   4107  CD  GLN A 260     208.663 126.655  91.574  1.00  0.81           C
ATOM   4108  OE1 GLN A 260     209.698 126.760  92.230  1.00  0.81           O
ATOM   4109  NE2 GLN A 260     208.699 126.379  90.250  1.00  0.81           N
ATOM   4110  H   GLN A 260     207.021 127.704  96.094  1.00  0.00           H
ATOM   4111  HA  GLN A 260     205.490 128.198  93.776  1.00  0.00           H
ATOM   4112  HB2 GLN A 260     207.745 126.201  94.165  1.00  0.00           H
ATOM   4113  HB3 GLN A 260     207.966 127.937  93.879  1.00  0.00           H
ATOM   4114  HG2 GLN A 260     206.685 125.931  91.973  1.00  0.00           H
ATOM   4115  HG3 GLN A 260     206.781 127.680  91.680  1.00  0.00           H
ATOM   4116 HE21 GLN A 260     207.839 126.301  89.727  1.00  0.00           H
ATOM   4117 HE22 GLN A 260     209.586 126.251  89.785  1.00  0.00           H
ATOM   4118  N   ASP A 261     205.149 125.080  94.919  1.00  0.79           N
ATOM   4119  CA  ASP A 261     204.273 123.919  94.891  1.00  0.79           C
ATOM   4120  C   ASP A 261     202.822 124.272  95.201  1.00  0.79           C
ATOM   4121  O   ASP A 261     201.881 123.767  94.585  1.00  0.79           O
ATOM   4122  CB  ASP A 261     204.740 122.842  95.904  1.00  0.79           C
ATOM   4123  CG  ASP A 261     205.964 122.100  95.394  1.00  0.79           C
ATOM   4124  OD1 ASP A 261     206.005 121.814  94.172  1.00  0.79           O
ATOM   4125  OD2 ASP A 261     206.818 121.744  96.245  1.00  0.79           O
ATOM   4126  H   ASP A 261     205.910 125.084  95.583  1.00  0.00           H
ATOM   4127  HA  ASP A 261     204.312 123.486  93.891  1.00  0.00           H
ATOM   4128  HB2 ASP A 261     203.932 122.128  96.061  1.00  0.00           H
ATOM   4129  HB3 ASP A 261     204.982 123.323  96.852  1.00  0.00           H
ATOM   4130  N   LEU A 262     202.583 125.178  96.169  1.00  0.79           N
ATOM   4131  CA  LEU A 262     201.255 125.713  96.412  1.00  0.79           C
ATOM   4132  C   LEU A 262     200.686 126.526  95.243  1.00  0.79           C
ATOM   4133  O   LEU A 262     199.525 126.349  94.873  1.00  0.79           O
ATOM   4134  CB  LEU A 262     201.215 126.542  97.718  1.00  0.79           C
ATOM   4135  CG  LEU A 262     201.479 125.737  99.011  1.00  0.79           C
ATOM   4136  CD1 LEU A 262     201.419 126.668 100.230  1.00  0.79           C
ATOM   4137  CD2 LEU A 262     200.494 124.573  99.204  1.00  0.79           C
ATOM   4138  H   LEU A 262     203.351 125.495  96.743  1.00  0.00           H
ATOM   4139  HA  LEU A 262     200.592 124.860  96.557  1.00  0.00           H
ATOM   4140  HB2 LEU A 262     201.972 127.323  97.646  1.00  0.00           H
ATOM   4141  HB3 LEU A 262     200.236 127.015  97.798  1.00  0.00           H
ATOM   4142  HG  LEU A 262     202.485 125.322  98.952  1.00  0.00           H
ATOM   4143 HD11 LEU A 262     202.118 127.493 100.092  1.00  0.00           H
ATOM   4144 HD12 LEU A 262     200.408 127.062 100.337  1.00  0.00           H
ATOM   4145 HD13 LEU A 262     201.688 126.110 101.127  1.00  0.00           H
ATOM   4146 HD21 LEU A 262     200.537 123.912  98.338  1.00  0.00           H
ATOM   4147 HD22 LEU A 262     199.483 124.967  99.310  1.00  0.00           H
ATOM   4148 HD23 LEU A 262     200.763 124.015 100.101  1.00  0.00           H
ATOM   4149  N   HIS A 263     201.496 127.395  94.598  1.00  0.74           N
ATOM   4150  CA  HIS A 263     201.104 128.145  93.405  1.00  0.74           C
ATOM   4151  C   HIS A 263     200.736 127.267  92.209  1.00  0.74           C
ATOM   4152  O   HIS A 263     199.680 127.413  91.590  1.00  0.74           O
ATOM   4153  CB  HIS A 263     202.269 129.068  92.960  1.00  0.74           C
ATOM   4154  CG  HIS A 263     202.060 129.811  91.674  1.00  0.74           C
ATOM   4155  ND1 HIS A 263     201.142 130.833  91.621  1.00  0.74           N
ATOM   4156  CD2 HIS A 263     202.713 129.707  90.488  1.00  0.74           C
ATOM   4157  CE1 HIS A 263     201.263 131.345  90.416  1.00  0.74           C
ATOM   4158  NE2 HIS A 263     202.198 130.699  89.683  1.00  0.74           N
ATOM   4159  H   HIS A 263     202.428 127.535  94.962  1.00  0.00           H
ATOM   4160  HA  HIS A 263     200.245 128.768  93.654  1.00  0.00           H
ATOM   4161  HB2 HIS A 263     202.432 129.803  93.748  1.00  0.00           H
ATOM   4162  HB3 HIS A 263     203.170 128.462  92.864  1.00  0.00           H
ATOM   4163  HD2 HIS A 263     203.480 128.992  90.229  1.00  0.00           H
ATOM   4164  HE1 HIS A 263     200.684 132.182  90.054  1.00  0.00           H
ATOM   4165  HE2 HIS A 263     202.466 130.904  88.731  1.00  0.00           H
ATOM   4166  N   HIS A 264     201.582 126.275  91.866  1.00  0.72           N
ATOM   4167  CA  HIS A 264     201.374 125.463  90.677  1.00  0.72           C
ATOM   4168  C   HIS A 264     200.255 124.441  90.815  1.00  0.72           C
ATOM   4169  O   HIS A 264     199.664 124.027  89.817  1.00  0.72           O
ATOM   4170  CB  HIS A 264     202.684 124.802  90.189  1.00  0.72           C
ATOM   4171  CG  HIS A 264     203.552 125.785  89.455  1.00  0.72           C
ATOM   4172  ND1 HIS A 264     204.532 126.489  90.121  1.00  0.72           N
ATOM   4173  CD2 HIS A 264     203.493 126.187  88.157  1.00  0.72           C
ATOM   4174  CE1 HIS A 264     205.054 127.299  89.226  1.00  0.72           C
ATOM   4175  NE2 HIS A 264     204.461 127.160  88.017  1.00  0.72           N
ATOM   4176  H   HIS A 264     202.384 126.090  92.452  1.00  0.00           H
ATOM   4177  HA  HIS A 264     201.066 126.149  89.888  1.00  0.00           H
ATOM   4178  HB2 HIS A 264     203.231 124.420  91.051  1.00  0.00           H
ATOM   4179  HB3 HIS A 264     202.440 123.973  89.524  1.00  0.00           H
ATOM   4180  HD2 HIS A 264     202.825 125.820  87.392  1.00  0.00           H
ATOM   4181  HE1 HIS A 264     205.858 127.991  89.431  1.00  0.00           H
ATOM   4182  HD1 HIS A 264     204.794 126.401  91.092  1.00  0.00           H
ATOM   4183  N   LYS A 265     199.871 124.062  92.052  1.00  0.66           N
ATOM   4184  CA  LYS A 265     198.678 123.263  92.278  1.00  0.66           C
ATOM   4185  C   LYS A 265     197.381 124.054  92.152  1.00  0.66           C
ATOM   4186  O   LYS A 265     196.335 123.476  91.875  1.00  0.66           O
ATOM   4187  CB  LYS A 265     198.721 122.560  93.659  1.00  0.66           C
ATOM   4188  CG  LYS A 265     199.727 121.398  93.675  1.00  0.66           C
ATOM   4189  CD  LYS A 265     199.708 120.562  94.967  1.00  0.66           C
ATOM   4190  CE  LYS A 265     200.282 121.299  96.181  1.00  0.66           C
ATOM   4191  NZ  LYS A 265     200.336 120.384  97.343  1.00  0.66           N
ATOM   4192  H   LYS A 265     200.430 124.342  92.845  1.00  0.00           H
ATOM   4193  HA  LYS A 265     198.659 122.483  91.516  1.00  0.00           H
ATOM   4194  HB2 LYS A 265     197.729 122.171  93.888  1.00  0.00           H
ATOM   4195  HB3 LYS A 265     199.004 123.287  94.420  1.00  0.00           H
ATOM   4196  HG2 LYS A 265     199.499 120.738  92.838  1.00  0.00           H
ATOM   4197  HG3 LYS A 265     200.729 121.803  93.537  1.00  0.00           H
ATOM   4198  HD2 LYS A 265     198.676 120.289  95.186  1.00  0.00           H
ATOM   4199  HD3 LYS A 265     200.285 119.652  94.804  1.00  0.00           H
ATOM   4200  HE2 LYS A 265     201.288 121.649  95.949  1.00  0.00           H
ATOM   4201  HE3 LYS A 265     199.647 122.152  96.421  1.00  0.00           H
ATOM   4202  HZ1 LYS A 265     200.715 120.874  98.141  1.00  0.00           H
ATOM   4203  HZ2 LYS A 265     200.926 119.594  97.122  1.00  0.00           H
ATOM   4204  HZ3 LYS A 265     199.405 120.059  97.559  1.00  0.00           H
ATOM   4205  N   CYS A 266     197.407 125.392  92.318  1.00  0.68           N
ATOM   4206  CA  CYS A 266     196.260 126.251  92.044  1.00  0.68           C
ATOM   4207  C   CYS A 266     196.094 126.503  90.550  1.00  0.68           C
ATOM   4208  O   CYS A 266     195.005 126.426  89.985  1.00  0.68           O
ATOM   4209  CB  CYS A 266     196.438 127.594  92.807  1.00  0.68           C
ATOM   4210  SG  CYS A 266     195.075 128.806  92.708  1.00  0.68           S
ATOM   4211  H   CYS A 266     198.261 125.820  92.648  1.00  0.00           H
ATOM   4212  HA  CYS A 266     195.361 125.758  92.415  1.00  0.00           H
ATOM   4213  HB2 CYS A 266     196.586 127.354  93.860  1.00  0.00           H
ATOM   4214  HB3 CYS A 266     197.345 128.074  92.439  1.00  0.00           H
ATOM   4215  HG  CYS A 266     195.581 130.039  92.618  1.00  0.00           H
ATOM   4216  N   LYS A 267     197.212 126.774  89.852  1.00  0.61           N
ATOM   4217  CA  LYS A 267     197.237 127.099  88.436  1.00  0.61           C
ATOM   4218  C   LYS A 267     196.710 126.013  87.493  1.00  0.61           C
ATOM   4219  O   LYS A 267     196.094 126.309  86.463  1.00  0.61           O
ATOM   4220  CB  LYS A 267     198.692 127.474  88.050  1.00  0.61           C
ATOM   4221  CG  LYS A 267     198.947 127.789  86.563  1.00  0.61           C
ATOM   4222  CD  LYS A 267     198.067 128.920  85.996  1.00  0.61           C
ATOM   4223  CE  LYS A 267     198.220 129.122  84.486  1.00  0.61           C
ATOM   4224  NZ  LYS A 267     197.905 127.853  83.788  1.00  0.61           N
ATOM   4225  H   LYS A 267     198.093 126.750  90.345  1.00  0.00           H
ATOM   4226  HA  LYS A 267     196.620 127.986  88.292  1.00  0.00           H
ATOM   4227  HB2 LYS A 267     198.972 128.355  88.628  1.00  0.00           H
ATOM   4228  HB3 LYS A 267     199.345 126.652  88.342  1.00  0.00           H
ATOM   4229  HG2 LYS A 267     199.991 128.079  86.450  1.00  0.00           H
ATOM   4230  HG3 LYS A 267     198.771 126.885  85.980  1.00  0.00           H
ATOM   4231  HD2 LYS A 267     197.024 128.683  86.207  1.00  0.00           H
ATOM   4232  HD3 LYS A 267     198.324 129.851  86.502  1.00  0.00           H
ATOM   4233  HE2 LYS A 267     199.245 129.417  84.260  1.00  0.00           H
ATOM   4234  HE3 LYS A 267     197.535 129.901  84.152  1.00  0.00           H
ATOM   4235  HZ1 LYS A 267     198.005 127.983  82.791  1.00  0.00           H
ATOM   4236  HZ2 LYS A 267     198.540 127.132  84.099  1.00  0.00           H
ATOM   4237  HZ3 LYS A 267     196.956 127.580  83.998  1.00  0.00           H
ATOM   4238  N   ASN A 268     196.974 124.732  87.818  1.00  0.61           N
ATOM   4239  CA  ASN A 268     196.697 123.597  86.953  1.00  0.61           C
ATOM   4240  C   ASN A 268     195.558 122.733  87.501  1.00  0.61           C
ATOM   4241  O   ASN A 268     195.393 121.573  87.119  1.00  0.61           O
ATOM   4242  CB  ASN A 268     197.987 122.753  86.777  1.00  0.61           C
ATOM   4243  CG  ASN A 268     199.061 123.572  86.061  1.00  0.61           C
ATOM   4244  OD1 ASN A 268     198.805 124.466  85.248  1.00  0.61           O
ATOM   4245  ND2 ASN A 268     200.341 123.242  86.354  1.00  0.61           N
ATOM   4246  H   ASN A 268     197.391 124.549  88.720  1.00  0.00           H
ATOM   4247  HA  ASN A 268     196.400 123.976  85.975  1.00  0.00           H
ATOM   4248  HB2 ASN A 268     198.357 122.453  87.757  1.00  0.00           H
ATOM   4249  HB3 ASN A 268     197.759 121.864  86.189  1.00  0.00           H
ATOM   4250 HD21 ASN A 268     200.533 122.503  87.015  1.00  0.00           H
ATOM   4251 HD22 ASN A 268     201.104 123.735  85.912  1.00  0.00           H
ATOM   4252  N   SER A 269     194.725 123.283  88.407  1.00  0.57           N
ATOM   4253  CA  SER A 269     193.613 122.557  89.006  1.00  0.57           C
ATOM   4254  C   SER A 269     192.400 123.465  89.147  1.00  0.57           C
ATOM   4255  O   SER A 269     192.216 124.431  88.407  1.00  0.57           O
ATOM   4256  CB  SER A 269     194.009 121.947  90.386  1.00  0.57           C
ATOM   4257  OG  SER A 269     193.108 120.928  90.838  1.00  0.57           O
ATOM   4258  H   SER A 269     194.879 124.242  88.683  1.00  0.00           H
ATOM   4259  HA  SER A 269     193.346 121.738  88.339  1.00  0.00           H
ATOM   4260  HB2 SER A 269     194.024 122.747  91.126  1.00  0.00           H
ATOM   4261  HB3 SER A 269     195.010 121.522  90.308  1.00  0.00           H
ATOM   4262  HG  SER A 269     193.598 120.120  91.009  1.00  0.00           H
ATOM   4263  N   ARG A 270     191.506 123.148  90.100  1.00  0.50           N
ATOM   4264  CA  ARG A 270     190.316 123.908  90.420  1.00  0.50           C
ATOM   4265  C   ARG A 270     190.613 125.294  90.985  1.00  0.50           C
ATOM   4266  O   ARG A 270     191.090 125.427  92.106  1.00  0.50           O
ATOM   4267  CB  ARG A 270     189.463 123.143  91.467  1.00  0.50           C
ATOM   4268  CG  ARG A 270     188.102 123.800  91.788  1.00  0.50           C
ATOM   4269  CD  ARG A 270     187.369 123.129  92.952  1.00  0.50           C
ATOM   4270  NE  ARG A 270     185.997 123.737  93.001  1.00  0.50           N
ATOM   4271  CZ  ARG A 270     185.090 123.528  93.962  1.00  0.50           C
ATOM   4272  NH1 ARG A 270     183.908 124.133  93.870  1.00  0.50           N
ATOM   4273  NH2 ARG A 270     185.360 122.759  95.009  1.00  0.50           N
ATOM   4274  H   ARG A 270     191.679 122.310  90.637  1.00  0.00           H
ATOM   4275  HA  ARG A 270     189.725 124.024  89.511  1.00  0.00           H
ATOM   4276  HB2 ARG A 270     190.036 123.079  92.392  1.00  0.00           H
ATOM   4277  HB3 ARG A 270     189.283 122.133  91.098  1.00  0.00           H
ATOM   4278  HG2 ARG A 270     188.274 124.846  92.043  1.00  0.00           H
ATOM   4279  HG3 ARG A 270     187.471 123.753  90.901  1.00  0.00           H
ATOM   4280  HD2 ARG A 270     187.897 123.316  93.887  1.00  0.00           H
ATOM   4281  HD3 ARG A 270     187.294 122.056  92.775  1.00  0.00           H
ATOM   4282  HE  ARG A 270     185.737 124.355  92.246  1.00  0.00           H
ATOM   4283 HH11 ARG A 270     183.705 124.728  93.079  1.00  0.00           H
ATOM   4284 HH12 ARG A 270     183.214 123.997  94.591  1.00  0.00           H
ATOM   4285 HH21 ARG A 270     186.261 122.309  95.086  1.00  0.00           H
ATOM   4286 HH22 ARG A 270     184.665 122.624  95.729  1.00  0.00           H
ATOM   4287  N   ARG A 271     190.283 126.367  90.233  1.00  0.32           N
ATOM   4288  CA  ARG A 271     190.438 127.741  90.692  1.00  0.32           C
ATOM   4289  C   ARG A 271     189.575 128.138  91.883  1.00  0.32           C
ATOM   4290  O   ARG A 271     190.004 128.861  92.777  1.00  0.32           O
ATOM   4291  CB  ARG A 271     190.222 128.761  89.553  1.00  0.32           C
ATOM   4292  CG  ARG A 271     191.331 128.672  88.491  1.00  0.32           C
ATOM   4293  CD  ARG A 271     191.273 129.811  87.475  1.00  0.32           C
ATOM   4294  NE  ARG A 271     192.363 129.538  86.491  1.00  0.32           N
ATOM   4295  CZ  ARG A 271     192.514 130.200  85.338  1.00  0.32           C
ATOM   4296  NH1 ARG A 271     193.416 129.776  84.457  1.00  0.32           N
ATOM   4297  NH2 ARG A 271     191.771 131.260  85.036  1.00  0.32           N
ATOM   4298  H   ARG A 271     189.911 126.209  89.308  1.00  0.00           H
ATOM   4299  HA  ARG A 271     191.475 127.847  91.011  1.00  0.00           H
ATOM   4300  HB2 ARG A 271     190.217 129.766  89.975  1.00  0.00           H
ATOM   4301  HB3 ARG A 271     189.259 128.569  89.080  1.00  0.00           H
ATOM   4302  HG2 ARG A 271     192.298 128.703  88.994  1.00  0.00           H
ATOM   4303  HG3 ARG A 271     191.239 127.723  87.963  1.00  0.00           H
ATOM   4304  HD2 ARG A 271     191.439 130.768  87.969  1.00  0.00           H
ATOM   4305  HD3 ARG A 271     190.307 129.813  86.971  1.00  0.00           H
ATOM   4306  HE  ARG A 271     193.027 128.809  86.709  1.00  0.00           H
ATOM   4307 HH11 ARG A 271     193.984 128.967  84.665  1.00  0.00           H
ATOM   4308 HH12 ARG A 271     193.533 130.263  83.580  1.00  0.00           H
ATOM   4309 HH21 ARG A 271     191.075 131.591  85.689  1.00  0.00           H
ATOM   4310 HH22 ARG A 271     191.902 131.734  84.154  1.00  0.00           H
ATOM   4311  N   GLN A 272     188.308 127.685  91.925  1.00  0.51           N
ATOM   4312  CA  GLN A 272     187.415 127.953  93.039  1.00  0.51           C
ATOM   4313  C   GLN A 272     187.904 127.374  94.364  1.00  0.51           C
ATOM   4314  O   GLN A 272     187.892 126.161  94.575  1.00  0.51           O
ATOM   4315  CB  GLN A 272     186.021 127.346  92.785  1.00  0.51           C
ATOM   4316  CG  GLN A 272     185.239 127.948  91.602  1.00  0.51           C
ATOM   4317  CD  GLN A 272     183.994 127.098  91.353  1.00  0.51           C
ATOM   4318  OE1 GLN A 272     183.909 125.945  91.793  1.00  0.51           O
ATOM   4319  NE2 GLN A 272     183.015 127.666  90.619  1.00  0.51           N
ATOM   4320  H   GLN A 272     187.964 127.136  91.150  1.00  0.00           H
ATOM   4321  HA  GLN A 272     187.310 129.032  93.149  1.00  0.00           H
ATOM   4322  HB2 GLN A 272     186.149 126.280  92.595  1.00  0.00           H
ATOM   4323  HB3 GLN A 272     185.424 127.465  93.689  1.00  0.00           H
ATOM   4324  HG2 GLN A 272     185.866 127.949  90.711  1.00  0.00           H
ATOM   4325  HG3 GLN A 272     184.943 128.969  91.842  1.00  0.00           H
ATOM   4326 HE21 GLN A 272     183.126 128.608  90.272  1.00  0.00           H
ATOM   4327 HE22 GLN A 272     182.171 127.149  90.416  1.00  0.00           H
ATOM   4328  N   GLY A 273     188.316 128.252  95.298  1.00  0.60           N
ATOM   4329  CA  GLY A 273     188.839 127.845  96.594  1.00  0.60           C
ATOM   4330  C   GLY A 273     190.330 127.649  96.634  1.00  0.60           C
ATOM   4331  O   GLY A 273     190.858 127.289  97.681  1.00  0.60           O
ATOM   4332  H   GLY A 273     188.260 129.239  95.090  1.00  0.00           H
ATOM   4333  HA2 GLY A 273     188.365 126.904  96.871  1.00  0.00           H
ATOM   4334  HA3 GLY A 273     188.568 128.601  97.331  1.00  0.00           H
ATOM   4335  N   CYS A 274     191.067 127.900  95.529  1.00  0.67           N
ATOM   4336  CA  CYS A 274     192.522 127.910  95.576  1.00  0.67           C
ATOM   4337  C   CYS A 274     193.044 129.333  95.660  1.00  0.67           C
ATOM   4338  O   CYS A 274     192.365 130.299  95.320  1.00  0.67           O
ATOM   4339  CB  CYS A 274     193.212 127.055  94.465  1.00  0.67           C
ATOM   4340  SG  CYS A 274     193.360 127.731  92.779  1.00  0.67           S
ATOM   4341  H   CYS A 274     190.599 128.084  94.653  1.00  0.00           H
ATOM   4342  HA  CYS A 274     192.791 127.440  96.522  1.00  0.00           H
ATOM   4343  HB2 CYS A 274     194.223 126.841  94.811  1.00  0.00           H
ATOM   4344  HB3 CYS A 274     192.678 126.107  94.396  1.00  0.00           H
ATOM   4345  HG  CYS A 274     192.271 127.413  92.074  1.00  0.00           H
ATOM   4346  N   HIS A 275     194.279 129.498  96.162  1.00  0.70           N
ATOM   4347  CA  HIS A 275     194.926 130.789  96.293  1.00  0.70           C
ATOM   4348  C   HIS A 275     196.181 130.751  95.460  1.00  0.70           C
ATOM   4349  O   HIS A 275     197.044 129.897  95.657  1.00  0.70           O
ATOM   4350  CB  HIS A 275     195.320 131.079  97.756  1.00  0.70           C
ATOM   4351  CG  HIS A 275     194.139 131.188  98.664  1.00  0.70           C
ATOM   4352  ND1 HIS A 275     194.319 130.960 100.015  1.00  0.70           N
ATOM   4353  CD2 HIS A 275     192.846 131.522  98.409  1.00  0.70           C
ATOM   4354  CE1 HIS A 275     193.133 131.154 100.553  1.00  0.70           C
ATOM   4355  NE2 HIS A 275     192.205 131.497  99.627  1.00  0.70           N
ATOM   4356  H   HIS A 275     194.785 128.678  96.465  1.00  0.00           H
ATOM   4357  HA  HIS A 275     194.263 131.573  95.927  1.00  0.00           H
ATOM   4358  HB2 HIS A 275     195.958 130.270  98.111  1.00  0.00           H
ATOM   4359  HB3 HIS A 275     195.881 132.013  97.792  1.00  0.00           H
ATOM   4360  HD2 HIS A 275     192.411 131.758  97.449  1.00  0.00           H
ATOM   4361  HE1 HIS A 275     192.924 131.052 101.608  1.00  0.00           H
ATOM   4362  HE2 HIS A 275     191.230 131.696  99.798  1.00  0.00           H
ATOM   4363  N   GLN A 276     196.303 131.655  94.471  1.00  0.68           N
ATOM   4364  CA  GLN A 276     197.422 131.659  93.552  1.00  0.68           C
ATOM   4365  C   GLN A 276     198.603 132.423  94.142  1.00  0.68           C
ATOM   4366  O   GLN A 276     198.858 133.577  93.802  1.00  0.68           O
ATOM   4367  CB  GLN A 276     196.994 132.209  92.168  1.00  0.68           C
ATOM   4368  CG  GLN A 276     198.048 131.907  91.082  1.00  0.68           C
ATOM   4369  CD  GLN A 276     197.654 132.406  89.696  1.00  0.68           C
ATOM   4370  OE1 GLN A 276     196.853 131.812  88.972  1.00  0.68           O
ATOM   4371  NE2 GLN A 276     198.273 133.532  89.275  1.00  0.68           N
ATOM   4372  H   GLN A 276     195.586 132.358  94.365  1.00  0.00           H
ATOM   4373  HA  GLN A 276     197.736 130.625  93.412  1.00  0.00           H
ATOM   4374  HB2 GLN A 276     196.049 131.747  91.881  1.00  0.00           H
ATOM   4375  HB3 GLN A 276     196.856 133.288  92.240  1.00  0.00           H
ATOM   4376  HG2 GLN A 276     198.192 130.828  91.032  1.00  0.00           H
ATOM   4377  HG3 GLN A 276     198.990 132.374  91.368  1.00  0.00           H
ATOM   4378 HE21 GLN A 276     198.939 133.997  89.876  1.00  0.00           H
ATOM   4379 HE22 GLN A 276     198.070 133.908  88.360  1.00  0.00           H
ATOM   4380  N   TYR A 277     199.316 131.768  95.083  1.00  0.76           N
ATOM   4381  CA  TYR A 277     200.334 132.358  95.934  1.00  0.76           C
ATOM   4382  C   TYR A 277     201.485 133.059  95.228  1.00  0.76           C
ATOM   4383  O   TYR A 277     202.079 132.571  94.270  1.00  0.76           O
ATOM   4384  CB  TYR A 277     200.965 131.296  96.876  1.00  0.76           C
ATOM   4385  CG  TYR A 277     200.016 130.882  97.963  1.00  0.76           C
ATOM   4386  CD1 TYR A 277     199.873 131.692  99.101  1.00  0.76           C
ATOM   4387  CD2 TYR A 277     199.296 129.680  97.890  1.00  0.76           C
ATOM   4388  CE1 TYR A 277     199.016 131.315 100.142  1.00  0.76           C
ATOM   4389  CE2 TYR A 277     198.441 129.295  98.935  1.00  0.76           C
ATOM   4390  CZ  TYR A 277     198.301 130.118 100.061  1.00  0.76           C
ATOM   4391  OH  TYR A 277     197.443 129.767 101.120  1.00  0.76           O
ATOM   4392  H   TYR A 277     199.125 130.784  95.205  1.00  0.00           H
ATOM   4393  HA  TYR A 277     199.841 133.098  96.564  1.00  0.00           H
ATOM   4394  HB2 TYR A 277     201.233 130.418  96.288  1.00  0.00           H
ATOM   4395  HB3 TYR A 277     201.866 131.711  97.328  1.00  0.00           H
ATOM   4396  HD1 TYR A 277     200.429 132.615  99.174  1.00  0.00           H
ATOM   4397  HD2 TYR A 277     199.400 129.045  97.022  1.00  0.00           H
ATOM   4398  HE1 TYR A 277     198.908 131.950 101.009  1.00  0.00           H
ATOM   4399  HE2 TYR A 277     197.892 128.367  98.871  1.00  0.00           H
ATOM   4400  HH  TYR A 277     196.771 130.444 101.225  1.00  0.00           H
ATOM   4401  N   VAL A 278     201.861 134.233  95.756  1.00  0.83           N
ATOM   4402  CA  VAL A 278     202.894 135.070  95.190  1.00  0.83           C
ATOM   4403  C   VAL A 278     203.840 135.464  96.300  1.00  0.83           C
ATOM   4404  O   VAL A 278     203.564 135.284  97.485  1.00  0.83           O
ATOM   4405  CB  VAL A 278     202.355 136.330  94.518  1.00  0.83           C
ATOM   4406  CG1 VAL A 278     201.528 135.954  93.274  1.00  0.83           C
ATOM   4407  CG2 VAL A 278     201.500 137.132  95.511  1.00  0.83           C
ATOM   4408  H   VAL A 278     201.397 134.549  96.595  1.00  0.00           H
ATOM   4409  HA  VAL A 278     203.446 134.490  94.451  1.00  0.00           H
ATOM   4410  HB  VAL A 278     203.197 136.947  94.204  1.00  0.00           H
ATOM   4411 HG11 VAL A 278     201.148 136.860  92.802  1.00  0.00           H
ATOM   4412 HG12 VAL A 278     202.159 135.414  92.568  1.00  0.00           H
ATOM   4413 HG13 VAL A 278     200.692 135.321  93.571  1.00  0.00           H
ATOM   4414 HG21 VAL A 278     201.120 138.029  95.022  1.00  0.00           H
ATOM   4415 HG22 VAL A 278     200.663 136.520  95.847  1.00  0.00           H
ATOM   4416 HG23 VAL A 278     202.110 137.416  96.369  1.00  0.00           H
ATOM   4417  N   ILE A 279     205.015 136.006  95.945  1.00  0.83           N
ATOM   4418  CA  ILE A 279     206.026 136.387  96.908  1.00  0.83           C
ATOM   4419  C   ILE A 279     206.180 137.895  96.861  1.00  0.83           C
ATOM   4420  O   ILE A 279     206.433 138.506  95.824  1.00  0.83           O
ATOM   4421  CB  ILE A 279     207.350 135.657  96.676  1.00  0.83           C
ATOM   4422  CG1 ILE A 279     207.137 134.139  96.915  1.00  0.83           C
ATOM   4423  CG2 ILE A 279     208.450 136.208  97.615  1.00  0.83           C
ATOM   4424  CD1 ILE A 279     208.340 133.265  96.546  1.00  0.83           C
ATOM   4425  H   ILE A 279     205.202 136.154  94.964  1.00  0.00           H
ATOM   4426  HA  ILE A 279     205.663 136.117  97.900  1.00  0.00           H
ATOM   4427  HB  ILE A 279     207.660 135.810  95.642  1.00  0.00           H
ATOM   4428 HG12 ILE A 279     206.285 133.816  96.317  1.00  0.00           H
ATOM   4429 HG13 ILE A 279     206.903 133.982  97.968  1.00  0.00           H
ATOM   4430 HG21 ILE A 279     209.384 135.675  97.434  1.00  0.00           H
ATOM   4431 HG22 ILE A 279     208.146 136.066  98.652  1.00  0.00           H
ATOM   4432 HG23 ILE A 279     208.595 137.271  97.421  1.00  0.00           H
ATOM   4433 HD11 ILE A 279     208.105 132.219  96.745  1.00  0.00           H
ATOM   4434 HD12 ILE A 279     209.202 133.563  97.143  1.00  0.00           H
ATOM   4435 HD13 ILE A 279     208.570 133.391  95.488  1.00  0.00           H
ATOM   4436  N   HIS A 280     206.012 138.568  98.009  1.00  0.81           N
ATOM   4437  CA  HIS A 280     206.270 139.989  98.086  1.00  0.81           C
ATOM   4438  C   HIS A 280     206.762 140.336  99.468  1.00  0.81           C
ATOM   4439  O   HIS A 280     206.268 139.817 100.466  1.00  0.81           O
ATOM   4440  CB  HIS A 280     205.031 140.842  97.739  1.00  0.81           C
ATOM   4441  CG  HIS A 280     205.340 142.306  97.703  1.00  0.81           C
ATOM   4442  ND1 HIS A 280     204.975 143.107  98.767  1.00  0.81           N
ATOM   4443  CD2 HIS A 280     206.104 143.007  96.826  1.00  0.81           C
ATOM   4444  CE1 HIS A 280     205.518 144.279  98.516  1.00  0.81           C
ATOM   4445  NE2 HIS A 280     206.215 144.273  97.354  1.00  0.81           N
ATOM   4446  H   HIS A 280     205.700 138.074  98.833  1.00  0.00           H
ATOM   4447  HA  HIS A 280     207.059 140.230  97.374  1.00  0.00           H
ATOM   4448  HB2 HIS A 280     204.660 140.538  96.760  1.00  0.00           H
ATOM   4449  HB3 HIS A 280     204.256 140.661  98.484  1.00  0.00           H
ATOM   4450  HD2 HIS A 280     206.535 142.646  95.904  1.00  0.00           H
ATOM   4451  HE1 HIS A 280     205.420 145.142  99.159  1.00  0.00           H
ATOM   4452  HE2 HIS A 280     206.720 145.050  96.952  1.00  0.00           H
ATOM   4453  N   ASN A 281     207.793 141.209  99.549  1.00  0.80           N
ATOM   4454  CA  ASN A 281     208.377 141.704 100.788  1.00  0.80           C
ATOM   4455  C   ASN A 281     208.863 140.581 101.710  1.00  0.80           C
ATOM   4456  O   ASN A 281     208.649 140.596 102.919  1.00  0.80           O
ATOM   4457  CB  ASN A 281     207.372 142.670 101.472  1.00  0.80           C
ATOM   4458  CG  ASN A 281     208.068 143.650 102.404  1.00  0.80           C
ATOM   4459  OD1 ASN A 281     209.290 143.729 102.490  1.00  0.80           O
ATOM   4460  ND2 ASN A 281     207.254 144.472 103.106  1.00  0.80           N
ATOM   4461  H   ASN A 281     208.189 141.544  98.682  1.00  0.00           H
ATOM   4462  HA  ASN A 281     209.252 142.294 100.515  1.00  0.00           H
ATOM   4463  HB2 ASN A 281     206.657 142.083 102.049  1.00  0.00           H
ATOM   4464  HB3 ASN A 281     206.837 143.228 100.704  1.00  0.00           H
ATOM   4465 HD21 ASN A 281     206.252 144.398 103.004  1.00  0.00           H
ATOM   4466 HD22 ASN A 281     207.649 145.160 103.732  1.00  0.00           H
ATOM   4467  N   ASN A 282     209.499 139.558 101.099  1.00  0.82           N
ATOM   4468  CA  ASN A 282     209.964 138.325 101.714  1.00  0.82           C
ATOM   4469  C   ASN A 282     208.875 137.444 102.324  1.00  0.82           C
ATOM   4470  O   ASN A 282     209.147 136.587 103.161  1.00  0.82           O
ATOM   4471  CB  ASN A 282     211.120 138.554 102.720  1.00  0.82           C
ATOM   4472  CG  ASN A 282     212.267 139.235 101.991  1.00  0.82           C
ATOM   4473  OD1 ASN A 282     212.636 138.859 100.877  1.00  0.82           O
ATOM   4474  ND2 ASN A 282     212.856 140.279 102.616  1.00  0.82           N
ATOM   4475  H   ASN A 282     209.670 139.660 100.109  1.00  0.00           H
ATOM   4476  HA  ASN A 282     210.395 137.738 100.903  1.00  0.00           H
ATOM   4477  HB2 ASN A 282     210.776 139.188 103.537  1.00  0.00           H
ATOM   4478  HB3 ASN A 282     211.456 137.596 103.117  1.00  0.00           H
ATOM   4479 HD21 ASN A 282     212.532 140.570 103.527  1.00  0.00           H
ATOM   4480 HD22 ASN A 282     213.620 140.768 102.172  1.00  0.00           H
ATOM   4481  N   LYS A 283     207.615 137.585 101.877  1.00  0.82           N
ATOM   4482  CA  LYS A 283     206.509 136.807 102.387  1.00  0.82           C
ATOM   4483  C   LYS A 283     205.797 136.098 101.258  1.00  0.82           C
ATOM   4484  O   LYS A 283     205.592 136.663 100.186  1.00  0.82           O
ATOM   4485  CB  LYS A 283     205.488 137.715 103.109  1.00  0.82           C
ATOM   4486  CG  LYS A 283     206.124 138.516 104.253  1.00  0.82           C
ATOM   4487  CD  LYS A 283     205.107 139.302 105.087  1.00  0.82           C
ATOM   4488  CE  LYS A 283     204.549 140.516 104.345  1.00  0.82           C
ATOM   4489  NZ  LYS A 283     203.603 141.224 105.230  1.00  0.82           N
ATOM   4490  H   LYS A 283     207.433 138.265 101.153  1.00  0.00           H
ATOM   4491  HA  LYS A 283     206.888 136.066 103.091  1.00  0.00           H
ATOM   4492  HB2 LYS A 283     205.067 138.413 102.385  1.00  0.00           H
ATOM   4493  HB3 LYS A 283     204.686 137.096 103.512  1.00  0.00           H
ATOM   4494  HG2 LYS A 283     206.647 137.822 104.911  1.00  0.00           H
ATOM   4495  HG3 LYS A 283     206.848 139.214 103.833  1.00  0.00           H
ATOM   4496  HD2 LYS A 283     205.595 139.645 105.999  1.00  0.00           H
ATOM   4497  HD3 LYS A 283     204.282 138.641 105.354  1.00  0.00           H
ATOM   4498  HE2 LYS A 283     205.365 141.185 104.072  1.00  0.00           H
ATOM   4499  HE3 LYS A 283     204.030 140.187 103.445  1.00  0.00           H
ATOM   4500  HZ1 LYS A 283     203.228 142.029 104.748  1.00  0.00           H
ATOM   4501  HZ2 LYS A 283     202.849 140.602 105.483  1.00  0.00           H
ATOM   4502  HZ3 LYS A 283     204.085 141.526 106.065  1.00  0.00           H
ATOM   4503  N   CYS A 284     205.373 134.841 101.487  1.00  0.86           N
ATOM   4504  CA  CYS A 284     204.526 134.107 100.560  1.00  0.86           C
ATOM   4505  C   CYS A 284     203.074 134.420 100.923  1.00  0.86           C
ATOM   4506  O   CYS A 284     202.579 134.026 101.981  1.00  0.86           O
ATOM   4507  CB  CYS A 284     204.845 132.585 100.637  1.00  0.86           C
ATOM   4508  SG  CYS A 284     203.856 131.491  99.551  1.00  0.86           S
ATOM   4509  H   CYS A 284     205.656 134.386 102.343  1.00  0.00           H
ATOM   4510  HA  CYS A 284     204.722 134.459  99.547  1.00  0.00           H
ATOM   4511  HB2 CYS A 284     204.684 132.264 101.666  1.00  0.00           H
ATOM   4512  HB3 CYS A 284     205.899 132.444 100.396  1.00  0.00           H
ATOM   4513  HG  CYS A 284     202.721 131.155 100.171  1.00  0.00           H
ATOM   4514  N   ILE A 285     202.376 135.195 100.066  1.00  0.80           N
ATOM   4515  CA  ILE A 285     201.087 135.808 100.362  1.00  0.80           C
ATOM   4516  C   ILE A 285     200.064 135.407  99.298  1.00  0.80           C
ATOM   4517  O   ILE A 285     200.467 135.040  98.194  1.00  0.80           O
ATOM   4518  CB  ILE A 285     201.153 137.339 100.470  1.00  0.80           C
ATOM   4519  CG1 ILE A 285     201.764 138.002  99.213  1.00  0.80           C
ATOM   4520  CG2 ILE A 285     201.938 137.705 101.748  1.00  0.80           C
ATOM   4521  CD1 ILE A 285     201.652 139.532  99.206  1.00  0.80           C
ATOM   4522  H   ILE A 285     202.776 135.362  99.154  1.00  0.00           H
ATOM   4523  HA  ILE A 285     200.743 135.419 101.321  1.00  0.00           H
ATOM   4524  HB  ILE A 285     200.135 137.711 100.584  1.00  0.00           H
ATOM   4525 HG12 ILE A 285     202.819 137.734  99.162  1.00  0.00           H
ATOM   4526 HG13 ILE A 285     201.260 137.610  98.330  1.00  0.00           H
ATOM   4527 HG21 ILE A 285     201.995 138.789 101.842  1.00  0.00           H
ATOM   4528 HG22 ILE A 285     202.945 137.292 101.686  1.00  0.00           H
ATOM   4529 HG23 ILE A 285     201.428 137.292 102.618  1.00  0.00           H
ATOM   4530 HD11 ILE A 285     202.102 139.926  98.294  1.00  0.00           H
ATOM   4531 HD12 ILE A 285     200.601 139.819  99.246  1.00  0.00           H
ATOM   4532 HD13 ILE A 285     202.173 139.938 100.073  1.00  0.00           H
ATOM   4533  N   PRO A 286     198.744 135.416  99.548  1.00  0.79           N
ATOM   4534  CA  PRO A 286     197.765 134.870  98.603  1.00  0.79           C
ATOM   4535  C   PRO A 286     197.661 135.558  97.256  1.00  0.79           C
ATOM   4536  O   PRO A 286     197.341 134.880  96.285  1.00  0.79           O
ATOM   4537  CB  PRO A 286     196.429 134.973  99.354  1.00  0.79           C
ATOM   4538  CG  PRO A 286     196.827 134.817 100.820  1.00  0.79           C
ATOM   4539  CD  PRO A 286     198.159 135.565 100.887  1.00  0.79           C
ATOM   4540  HA  PRO A 286     197.991 133.816  98.439  1.00  0.00           H
ATOM   4541  HB2 PRO A 286     195.749 134.178  99.049  1.00  0.00           H
ATOM   4542  HB3 PRO A 286     195.973 135.948  99.186  1.00  0.00           H
ATOM   4543  HG2 PRO A 286     196.087 135.272 101.479  1.00  0.00           H
ATOM   4544  HG3 PRO A 286     196.966 133.765 101.069  1.00  0.00           H
ATOM   4545  HD2 PRO A 286     198.810 135.122 101.641  1.00  0.00           H
ATOM   4546  HD3 PRO A 286     197.989 136.619 101.108  1.00  0.00           H
ATOM   4547  N   GLU A 287     197.863 136.886  97.193  1.00  0.74           N
ATOM   4548  CA  GLU A 287     197.705 137.673  95.988  1.00  0.74           C
ATOM   4549  C   GLU A 287     198.585 138.905  96.116  1.00  0.74           C
ATOM   4550  O   GLU A 287     198.919 139.328  97.222  1.00  0.74           O
ATOM   4551  CB  GLU A 287     196.261 138.202  95.799  1.00  0.74           C
ATOM   4552  CG  GLU A 287     195.193 137.144  95.437  1.00  0.74           C
ATOM   4553  CD  GLU A 287     193.902 137.877  95.138  1.00  0.74           C
ATOM   4554  OE1 GLU A 287     193.465 138.675  96.002  1.00  0.74           O
ATOM   4555  OE2 GLU A 287     193.409 137.823  93.993  1.00  0.74           O
ATOM   4556  H   GLU A 287     198.142 137.364  98.038  1.00  0.00           H
ATOM   4557  HA  GLU A 287     198.005 137.088  95.118  1.00  0.00           H
ATOM   4558  HB2 GLU A 287     195.956 138.678  96.731  1.00  0.00           H
ATOM   4559  HB3 GLU A 287     196.273 138.959  95.015  1.00  0.00           H
ATOM   4560  HG2 GLU A 287     195.047 136.462  96.275  1.00  0.00           H
ATOM   4561  HG3 GLU A 287     195.512 136.585  94.557  1.00  0.00           H
ATOM   4562  N   CYS A 288     198.993 139.527  94.984  1.00  0.81           N
ATOM   4563  CA  CYS A 288     199.705 140.800  95.009  1.00  0.81           C
ATOM   4564  C   CYS A 288     198.834 141.948  95.542  1.00  0.81           C
ATOM   4565  O   CYS A 288     197.636 141.987  95.238  1.00  0.81           O
ATOM   4566  CB  CYS A 288     200.280 141.220  93.625  1.00  0.81           C
ATOM   4567  SG  CYS A 288     201.543 140.080  92.968  1.00  0.81           S
ATOM   4568  H   CYS A 288     198.798 139.095  94.092  1.00  0.00           H
ATOM   4569  HA  CYS A 288     200.548 140.688  95.691  1.00  0.00           H
ATOM   4570  HB2 CYS A 288     199.457 141.267  92.912  1.00  0.00           H
ATOM   4571  HB3 CYS A 288     200.720 142.213  93.716  1.00  0.00           H
ATOM   4572  HG  CYS A 288     201.130 139.583  91.799  1.00  0.00           H
ATOM   4573  N   PRO A 289     199.360 142.893  96.325  1.00  0.81           N
ATOM   4574  CA  PRO A 289     198.598 144.043  96.793  1.00  0.81           C
ATOM   4575  C   PRO A 289     198.515 145.120  95.720  1.00  0.81           C
ATOM   4576  O   PRO A 289     199.184 145.026  94.692  1.00  0.81           O
ATOM   4577  CB  PRO A 289     199.418 144.515  98.007  1.00  0.81           C
ATOM   4578  CG  PRO A 289     200.862 144.202  97.615  1.00  0.81           C
ATOM   4579  CD  PRO A 289     200.724 142.878  96.865  1.00  0.81           C
ATOM   4580  HA  PRO A 289     197.599 143.737  97.104  1.00  0.00           H
ATOM   4581  HB2 PRO A 289     199.284 145.584  98.174  1.00  0.00           H
ATOM   4582  HB3 PRO A 289     199.136 143.953  98.897  1.00  0.00           H
ATOM   4583  HG2 PRO A 289     201.272 144.979  96.969  1.00  0.00           H
ATOM   4584  HG3 PRO A 289     201.481 144.076  98.503  1.00  0.00           H
ATOM   4585  HD2 PRO A 289     200.859 142.036  97.544  1.00  0.00           H
ATOM   4586  HD3 PRO A 289     201.450 142.827  96.054  1.00  0.00           H
ATOM   4587  N   SER A 290     197.657 146.138  95.941  1.00  0.78           N
ATOM   4588  CA  SER A 290     197.433 147.312  95.101  1.00  0.78           C
ATOM   4589  C   SER A 290     198.637 147.898  94.384  1.00  0.78           C
ATOM   4590  O   SER A 290     199.633 148.266  95.000  1.00  0.78           O
ATOM   4591  CB  SER A 290     196.769 148.456  95.905  1.00  0.78           C
ATOM   4592  OG  SER A 290     195.606 147.950  96.556  1.00  0.78           O
ATOM   4593  H   SER A 290     197.106 146.082  96.785  1.00  0.00           H
ATOM   4594  HA  SER A 290     196.722 147.016  94.330  1.00  0.00           H
ATOM   4595  HB2 SER A 290     197.470 148.834  96.650  1.00  0.00           H
ATOM   4596  HB3 SER A 290     196.487 149.262  95.228  1.00  0.00           H
ATOM   4597  HG  SER A 290     195.559 148.303  97.448  1.00  0.00           H
ATOM   4598  N   GLY A 291     198.547 148.038  93.046  1.00  0.75           N
ATOM   4599  CA  GLY A 291     199.601 148.604  92.212  1.00  0.75           C
ATOM   4600  C   GLY A 291     200.709 147.672  91.781  1.00  0.75           C
ATOM   4601  O   GLY A 291     201.597 148.095  91.041  1.00  0.75           O
ATOM   4602  H   GLY A 291     197.697 147.732  92.594  1.00  0.00           H
ATOM   4603  HA2 GLY A 291     199.131 148.996  91.310  1.00  0.00           H
ATOM   4604  HA3 GLY A 291     200.050 149.438  92.751  1.00  0.00           H
ATOM   4605  N   TYR A 292     200.702 146.388  92.197  1.00  0.76           N
ATOM   4606  CA  TYR A 292     201.775 145.447  91.892  1.00  0.76           C
ATOM   4607  C   TYR A 292     201.262 144.236  91.101  1.00  0.76           C
ATOM   4608  O   TYR A 292     200.141 143.772  91.293  1.00  0.76           O
ATOM   4609  CB  TYR A 292     202.482 144.913  93.175  1.00  0.76           C
ATOM   4610  CG  TYR A 292     203.109 145.939  94.097  1.00  0.76           C
ATOM   4611  CD1 TYR A 292     203.471 147.246  93.720  1.00  0.76           C
ATOM   4612  CD2 TYR A 292     203.379 145.538  95.417  1.00  0.76           C
ATOM   4613  CE1 TYR A 292     204.071 148.125  94.633  1.00  0.76           C
ATOM   4614  CE2 TYR A 292     203.932 146.428  96.347  1.00  0.76           C
ATOM   4615  CZ  TYR A 292     204.295 147.717  95.948  1.00  0.76           C
ATOM   4616  OH  TYR A 292     204.888 148.606  96.864  1.00  0.76           O
ATOM   4617  H   TYR A 292     199.918 146.063  92.745  1.00  0.00           H
ATOM   4618  HA  TYR A 292     202.518 145.962  91.283  1.00  0.00           H
ATOM   4619  HB2 TYR A 292     201.740 144.362  93.753  1.00  0.00           H
ATOM   4620  HB3 TYR A 292     203.259 144.214  92.868  1.00  0.00           H
ATOM   4621  HD1 TYR A 292     203.283 147.578  92.709  1.00  0.00           H
ATOM   4622  HD2 TYR A 292     203.156 144.526  95.720  1.00  0.00           H
ATOM   4623  HE1 TYR A 292     204.359 149.117  94.318  1.00  0.00           H
ATOM   4624  HE2 TYR A 292     204.078 146.118  97.371  1.00  0.00           H
ATOM   4625  HH  TYR A 292     204.339 149.388  96.952  1.00  0.00           H
ATOM   4626  N   THR A 293     202.090 143.689  90.179  1.00  0.76           N
ATOM   4627  CA  THR A 293     201.743 142.551  89.310  1.00  0.76           C
ATOM   4628  C   THR A 293     202.820 141.483  89.429  1.00  0.76           C
ATOM   4629  O   THR A 293     203.986 141.790  89.629  1.00  0.76           O
ATOM   4630  CB  THR A 293     201.600 142.944  87.837  1.00  0.76           C
ATOM   4631  OG1 THR A 293     200.503 143.832  87.681  1.00  0.76           O
ATOM   4632  CG2 THR A 293     201.284 141.762  86.910  1.00  0.76           C
ATOM   4633  H   THR A 293     203.012 144.090  90.080  1.00  0.00           H
ATOM   4634  HA  THR A 293     200.797 142.130  89.650  1.00  0.00           H
ATOM   4635  HB  THR A 293     202.514 143.434  87.502  1.00  0.00           H
ATOM   4636  HG1 THR A 293     199.850 143.656  88.362  1.00  0.00           H
ATOM   4637 HG21 THR A 293     200.847 142.133  85.983  1.00  0.00           H
ATOM   4638 HG22 THR A 293     202.203 141.220  86.687  1.00  0.00           H
ATOM   4639 HG23 THR A 293     200.578 141.093  87.402  1.00  0.00           H
ATOM   4640  N   MET A 294     202.481 140.179  89.353  1.00  0.71           N
ATOM   4641  CA  MET A 294     203.445 139.085  89.392  1.00  0.71           C
ATOM   4642  C   MET A 294     204.033 138.719  88.027  1.00  0.71           C
ATOM   4643  O   MET A 294     203.415 138.915  86.982  1.00  0.71           O
ATOM   4644  CB  MET A 294     202.829 137.807  90.028  1.00  0.71           C
ATOM   4645  CG  MET A 294     201.705 137.117  89.218  1.00  0.71           C
ATOM   4646  SD  MET A 294     200.125 138.021  89.154  1.00  0.71           S
ATOM   4647  CE  MET A 294     199.372 136.907  87.939  1.00  0.71           C
ATOM   4648  H   MET A 294     201.502 139.947  89.264  1.00  0.00           H
ATOM   4649  HA  MET A 294     204.271 139.401  90.029  1.00  0.00           H
ATOM   4650  HB2 MET A 294     203.632 137.083  90.166  1.00  0.00           H
ATOM   4651  HB3 MET A 294     202.433 138.069  91.009  1.00  0.00           H
ATOM   4652  HG2 MET A 294     201.517 136.142  89.667  1.00  0.00           H
ATOM   4653  HG3 MET A 294     202.058 136.966  88.198  1.00  0.00           H
ATOM   4654  HE1 MET A 294     198.361 137.245  87.713  1.00  0.00           H
ATOM   4655  HE2 MET A 294     199.335 135.897  88.347  1.00  0.00           H
ATOM   4656  HE3 MET A 294     199.968 136.909  87.026  1.00  0.00           H
ATOM   4657  N   ASN A 295     205.255 138.141  88.008  1.00  0.72           N
ATOM   4658  CA  ASN A 295     205.873 137.619  86.797  1.00  0.72           C
ATOM   4659  C   ASN A 295     205.562 136.136  86.570  1.00  0.72           C
ATOM   4660  O   ASN A 295     204.950 135.456  87.389  1.00  0.72           O
ATOM   4661  CB  ASN A 295     207.411 137.777  86.800  1.00  0.72           C
ATOM   4662  CG  ASN A 295     207.815 139.236  86.963  1.00  0.72           C
ATOM   4663  OD1 ASN A 295     207.331 140.143  86.288  1.00  0.72           O
ATOM   4664  ND2 ASN A 295     208.795 139.469  87.862  1.00  0.72           N
ATOM   4665  H   ASN A 295     205.765 138.068  88.877  1.00  0.00           H
ATOM   4666  HA  ASN A 295     205.479 138.179  85.949  1.00  0.00           H
ATOM   4667  HB2 ASN A 295     207.809 137.401  85.857  1.00  0.00           H
ATOM   4668  HB3 ASN A 295     207.829 137.196  87.622  1.00  0.00           H
ATOM   4669 HD21 ASN A 295     209.191 138.703  88.388  1.00  0.00           H
ATOM   4670 HD22 ASN A 295     209.132 140.410  88.009  1.00  0.00           H
ATOM   4671  N   SER A 296     205.974 135.607  85.394  1.00  0.64           N
ATOM   4672  CA  SER A 296     205.802 134.202  85.022  1.00  0.64           C
ATOM   4673  C   SER A 296     206.728 133.217  85.743  1.00  0.64           C
ATOM   4674  O   SER A 296     206.290 132.204  86.283  1.00  0.64           O
ATOM   4675  CB  SER A 296     206.022 134.033  83.487  1.00  0.64           C
ATOM   4676  OG  SER A 296     205.688 132.722  83.025  1.00  0.64           O
ATOM   4677  H   SER A 296     206.428 136.220  84.732  1.00  0.00           H
ATOM   4678  HA  SER A 296     204.773 133.920  85.246  1.00  0.00           H
ATOM   4679  HB2 SER A 296     207.071 134.226  83.261  1.00  0.00           H
ATOM   4680  HB3 SER A 296     205.407 134.762  82.959  1.00  0.00           H
ATOM   4681  HG  SER A 296     205.839 132.667  82.079  1.00  0.00           H
ATOM   4682  N   SER A 297     208.053 133.488  85.766  1.00  0.65           N
ATOM   4683  CA  SER A 297     209.052 132.555  86.282  1.00  0.65           C
ATOM   4684  C   SER A 297     209.311 132.707  87.765  1.00  0.65           C
ATOM   4685  O   SER A 297     209.317 131.734  88.516  1.00  0.65           O
ATOM   4686  CB  SER A 297     210.403 132.698  85.524  1.00  0.65           C
ATOM   4687  OG  SER A 297     210.833 134.062  85.457  1.00  0.65           O
ATOM   4688  H   SER A 297     208.367 134.379  85.409  1.00  0.00           H
ATOM   4689  HA  SER A 297     208.681 131.544  86.112  1.00  0.00           H
ATOM   4690  HB2 SER A 297     211.163 132.114  86.044  1.00  0.00           H
ATOM   4691  HB3 SER A 297     210.286 132.311  84.512  1.00  0.00           H
ATOM   4692  HG  SER A 297     211.667 134.112  84.984  1.00  0.00           H
ATOM   4693  N   ASN A 298     209.520 133.946  88.238  1.00  0.73           N
ATOM   4694  CA  ASN A 298     209.641 134.250  89.643  1.00  0.73           C
ATOM   4695  C   ASN A 298     208.335 134.841  90.136  1.00  0.73           C
ATOM   4696  O   ASN A 298     207.675 135.624  89.463  1.00  0.73           O
ATOM   4697  CB  ASN A 298     210.879 135.139  89.978  1.00  0.73           C
ATOM   4698  CG  ASN A 298     210.980 136.450  89.195  1.00  0.73           C
ATOM   4699  OD1 ASN A 298     210.150 136.854  88.385  1.00  0.73           O
ATOM   4700  ND2 ASN A 298     212.084 137.189  89.459  1.00  0.73           N
ATOM   4701  H   ASN A 298     209.596 134.705  87.576  1.00  0.00           H
ATOM   4702  HA  ASN A 298     209.779 133.302  90.164  1.00  0.00           H
ATOM   4703  HB2 ASN A 298     210.839 135.384  91.039  1.00  0.00           H
ATOM   4704  HB3 ASN A 298     211.782 134.557  89.793  1.00  0.00           H
ATOM   4705 HD21 ASN A 298     212.765 136.858  90.128  1.00  0.00           H
ATOM   4706 HD22 ASN A 298     212.226 138.071  88.987  1.00  0.00           H
ATOM   4707  N   LEU A 299     207.919 134.487  91.362  1.00  0.77           N
ATOM   4708  CA  LEU A 299     206.610 134.865  91.864  1.00  0.77           C
ATOM   4709  C   LEU A 299     206.637 136.216  92.559  1.00  0.77           C
ATOM   4710  O   LEU A 299     205.733 136.568  93.311  1.00  0.77           O
ATOM   4711  CB  LEU A 299     206.093 133.790  92.850  1.00  0.77           C
ATOM   4712  CG  LEU A 299     205.954 132.377  92.245  1.00  0.77           C
ATOM   4713  CD1 LEU A 299     205.489 131.386  93.322  1.00  0.77           C
ATOM   4714  CD2 LEU A 299     204.969 132.354  91.067  1.00  0.77           C
ATOM   4715  H   LEU A 299     208.533 133.943  91.951  1.00  0.00           H
ATOM   4716  HA  LEU A 299     205.920 134.923  91.022  1.00  0.00           H
ATOM   4717  HB2 LEU A 299     206.789 133.734  93.687  1.00  0.00           H
ATOM   4718  HB3 LEU A 299     205.120 134.104  93.227  1.00  0.00           H
ATOM   4719  HG  LEU A 299     206.932 132.059  91.883  1.00  0.00           H
ATOM   4720 HD11 LEU A 299     206.188 131.403  94.158  1.00  0.00           H
ATOM   4721 HD12 LEU A 299     204.497 131.670  93.673  1.00  0.00           H
ATOM   4722 HD13 LEU A 299     205.451 130.382  92.900  1.00  0.00           H
ATOM   4723 HD21 LEU A 299     205.299 133.057  90.303  1.00  0.00           H
ATOM   4724 HD22 LEU A 299     203.977 132.638  91.418  1.00  0.00           H
ATOM   4725 HD23 LEU A 299     204.931 131.350  90.645  1.00  0.00           H
ATOM   4726  N   LEU A 300     207.692 137.017  92.311  1.00  0.79           N
ATOM   4727  CA  LEU A 300     207.843 138.353  92.839  1.00  0.79           C
ATOM   4728  C   LEU A 300     206.812 139.318  92.280  1.00  0.79           C
ATOM   4729  O   LEU A 300     206.718 139.520  91.071  1.00  0.79           O
ATOM   4730  CB  LEU A 300     209.260 138.920  92.565  1.00  0.79           C
ATOM   4731  CG  LEU A 300     210.406 138.147  93.252  1.00  0.79           C
ATOM   4732  CD1 LEU A 300     211.764 138.715  92.819  1.00  0.79           C
ATOM   4733  CD2 LEU A 300     210.305 138.197  94.784  1.00  0.79           C
ATOM   4734  H   LEU A 300     208.426 136.659  91.716  1.00  0.00           H
ATOM   4735  HA  LEU A 300     207.705 138.304  93.919  1.00  0.00           H
ATOM   4736  HB2 LEU A 300     209.433 138.898  91.489  1.00  0.00           H
ATOM   4737  HB3 LEU A 300     209.290 139.957  92.900  1.00  0.00           H
ATOM   4738  HG  LEU A 300     210.354 137.104  92.938  1.00  0.00           H
ATOM   4739 HD21 LEU A 300     209.342 137.795  95.098  1.00  0.00           H
ATOM   4740 HD22 LEU A 300     210.394 139.230  95.120  1.00  0.00           H
ATOM   4741 HD23 LEU A 300     211.107 137.602  95.221  1.00  0.00           H
ATOM   4742 HD11 LEU A 300     211.842 138.682  91.732  1.00  0.00           H
ATOM   4743 HD12 LEU A 300     211.851 139.747  93.158  1.00  0.00           H
ATOM   4744 HD13 LEU A 300     212.564 138.119  93.259  1.00  0.00           H
ATOM   4745  N   CYS A 301     206.017 139.959  93.161  1.00  0.82           N
ATOM   4746  CA  CYS A 301     205.166 141.072  92.767  1.00  0.82           C
ATOM   4747  C   CYS A 301     205.999 142.313  92.453  1.00  0.82           C
ATOM   4748  O   CYS A 301     206.614 142.905  93.339  1.00  0.82           O
ATOM   4749  CB  CYS A 301     204.134 141.452  93.861  1.00  0.82           C
ATOM   4750  SG  CYS A 301     203.036 140.090  94.351  1.00  0.82           S
ATOM   4751  H   CYS A 301     206.012 139.657  94.125  1.00  0.00           H
ATOM   4752  HA  CYS A 301     204.622 140.787  91.866  1.00  0.00           H
ATOM   4753  HB2 CYS A 301     203.519 142.268  93.482  1.00  0.00           H
ATOM   4754  HB3 CYS A 301     204.672 141.801  94.742  1.00  0.00           H
ATOM   4755  HG  CYS A 301     203.691 139.261  95.168  1.00  0.00           H
ATOM   4756  N   THR A 302     206.044 142.734  91.178  1.00  0.78           N
ATOM   4757  CA  THR A 302     206.806 143.878  90.702  1.00  0.78           C
ATOM   4758  C   THR A 302     205.918 145.112  90.650  1.00  0.78           C
ATOM   4759  O   THR A 302     204.707 144.989  90.444  1.00  0.78           O
ATOM   4760  CB  THR A 302     207.433 143.661  89.322  1.00  0.78           C
ATOM   4761  OG1 THR A 302     206.476 143.216  88.374  1.00  0.78           O
ATOM   4762  CG2 THR A 302     208.497 142.562  89.432  1.00  0.78           C
ATOM   4763  H   THR A 302     205.507 142.216  90.497  1.00  0.00           H
ATOM   4764  HA  THR A 302     207.610 144.069  91.413  1.00  0.00           H
ATOM   4765  HB  THR A 302     207.893 144.587  88.976  1.00  0.00           H
ATOM   4766  HG1 THR A 302     205.614 143.157  88.792  1.00  0.00           H
ATOM   4767 HG21 THR A 302     208.952 142.397  88.455  1.00  0.00           H
ATOM   4768 HG22 THR A 302     208.031 141.639  89.776  1.00  0.00           H
ATOM   4769 HG23 THR A 302     209.264 142.869  90.143  1.00  0.00           H
ATOM   4770  N   PRO A 303     206.428 146.325  90.858  1.00  0.78           N
ATOM   4771  CA  PRO A 303     205.609 147.526  90.774  1.00  0.78           C
ATOM   4772  C   PRO A 303     205.298 147.922  89.341  1.00  0.78           C
ATOM   4773  O   PRO A 303     206.152 147.830  88.461  1.00  0.78           O
ATOM   4774  CB  PRO A 303     206.445 148.585  91.511  1.00  0.78           C
ATOM   4775  CG  PRO A 303     207.892 148.127  91.313  1.00  0.78           C
ATOM   4776  CD  PRO A 303     207.775 146.605  91.361  1.00  0.78           C
ATOM   4777  HA  PRO A 303     204.676 147.364  91.314  1.00  0.00           H
ATOM   4778  HB2 PRO A 303     206.289 149.572  91.075  1.00  0.00           H
ATOM   4779  HB3 PRO A 303     206.193 148.595  92.571  1.00  0.00           H
ATOM   4780  HG2 PRO A 303     208.534 148.497  92.113  1.00  0.00           H
ATOM   4781  HG3 PRO A 303     208.266 148.451  90.342  1.00  0.00           H
ATOM   4782  HD2 PRO A 303     208.528 146.141  90.725  1.00  0.00           H
ATOM   4783  HD3 PRO A 303     207.876 146.250  92.387  1.00  0.00           H
ATOM   4784  N   CYS A 304     204.052 148.357  89.085  1.00  0.65           N
ATOM   4785  CA  CYS A 304     203.582 148.669  87.752  1.00  0.65           C
ATOM   4786  C   CYS A 304     203.880 150.081  87.294  1.00  0.65           C
ATOM   4787  O   CYS A 304     203.847 151.047  88.053  1.00  0.65           O
ATOM   4788  CB  CYS A 304     202.050 148.491  87.667  1.00  0.65           C
ATOM   4789  SG  CYS A 304     201.588 146.761  87.948  1.00  0.65           S
ATOM   4790  H   CYS A 304     203.414 148.472  89.859  1.00  0.00           H
ATOM   4791  HA  CYS A 304     204.048 147.975  87.052  1.00  0.00           H
ATOM   4792  HB2 CYS A 304     201.575 149.115  88.424  1.00  0.00           H
ATOM   4793  HB3 CYS A 304     201.706 148.799  86.679  1.00  0.00           H
ATOM   4794  HG  CYS A 304     200.897 146.308  86.898  1.00  0.00           H
ATOM   4795  N   LEU A 305     204.093 150.248  85.974  1.00  0.42           N
ATOM   4796  CA  LEU A 305     204.104 151.548  85.326  1.00  0.42           C
ATOM   4797  C   LEU A 305     202.685 152.058  85.077  1.00  0.42           C
ATOM   4798  O   LEU A 305     202.271 152.313  83.950  1.00  0.42           O
ATOM   4799  CB  LEU A 305     204.879 151.492  83.986  1.00  0.42           C
ATOM   4800  CG  LEU A 305     206.376 151.149  84.127  1.00  0.42           C
ATOM   4801  CD1 LEU A 305     207.011 150.969  82.740  1.00  0.42           C
ATOM   4802  CD2 LEU A 305     207.143 152.223  84.914  1.00  0.42           C
[truncated: 2,251,166 more chars]
